# Supplementary material for: In Silico Analysis Highlights Potential Predictive Indicators Associated with Secondary Progressive Multiple Sclerosis
Source: MDPI journal article supplement (doi:10.3390/ijms25063374), 2024-03-16
Supplement: s1 [file s1]

Supplementary Figure S2

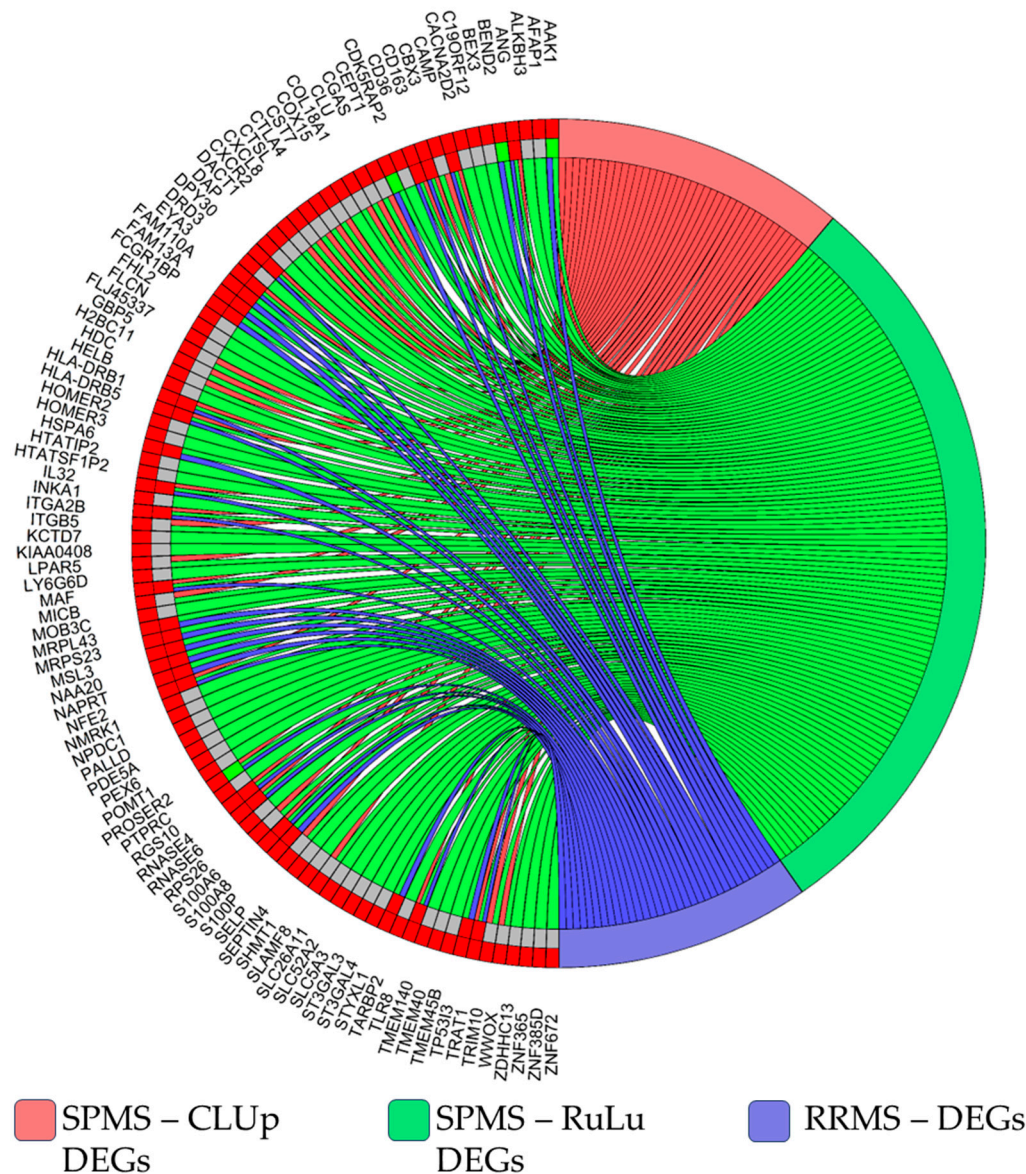

Supplementary Figure S2. In the chord plot we report RuLu DEGs (left-hand side) and the phenotypic groups in which they were differentially expressed (right-hand side). On the left, the outer ring reports the expression status in SPMS patients, while the inner one reports the expression status in RRMS patients. Red genes are up-regulated and Green down-regulated, while Gray represent no Differential expression. DEGs belonging to CLUp are linked to the red sector on the right-hand side, DEGs belonging to RuLu are linked to the green sector and genes found to also be differentially expressed in RRMS patients are linked to the blue sector.
