# Supplementary material for: In Silico Analysis Highlights Potential Predictive Indicators Associated with Secondary Progressive Multiple Sclerosis
Source: Int J Mol Sci. 2024 Mar 16;25(6):3374. doi: 10.3390/ijms25063374 (PMC10970138; doi:10.3390/ijms25063374)
Supplement: Supplementary file 1 [file ijms-25-03374-s001.zip]

Archive with 7 entries (7 files):
- Supplementary Figure S1.pdf
- Supplementary Figure S2.pdf
- Supplementary Table S1.xlsx
- Supplementary Table S2.xlsx
- Supplementary Table S3.xlsx
- Supplementary Table S4.xlsx
- Supplementary Table S5.xlsx
