# Supplementary material for: In Silico Analysis Highlights Potential Predictive Indicators Associated with Secondary Progressive Multiple Sclerosis
Source: Int J Mol Sci. 2024 Mar 16;25(6):3374. doi: 10.3390/ijms25063374 (PMC10970138; doi:10.3390/ijms25063374)
Supplement: Supplementary file 1 [file ijms-25-03374-s001.zip › Supplementary Table S1.xlsx]

## Sheet: GSE126802
Gene	FC	q.Value	p.Value	Direction
IGHM	5.13611	6.22e-09	1.82e-13	1
IGLL5	4.52489	2.8e-08	2.46e-12	1
SERPINA3	2.76855	4.92e-06	1.01e-09	1
HSPA1A	2.70197	2.64e-05	9.28e-09	1
S100A8	1.87371	2.7e-05	1.27e-08	1
HSPA1B	2.00521	0.0009269	5.7e-07	1
TUBA1C	2.04666	0.0009774	6.59e-07	1
ITGB1BP1	2.11864	0.001037	7.29e-07	1
CFD	2.13402	0.001039	7.61e-07	1
SERPINH1	2.07598	0.001244	1.02e-06	1
BAG3	2.30734	0.001245	9.85e-07	1
LY6H	1.95963	0.001894	1.78e-06	1
CHI3L2	2.14225	0.00192	1.74e-06	1
HSPA6	2.37699	0.002024	1.72e-06	1
HSPH1	2.05465	0.002271	2.26e-06	1
GPNMB	2.05804	0.003501	3.59e-06	1
DNAJB1	2.0028	0.005523	5.83e-06	1
HBB	1.7316	0.005613	6.42e-06	1
CD44	1.94439	0.005903	6.92e-06	1
SLC5A3	1.98886	0.005949	7.5e-06	1
APOC1	1.79565	0.006002	7.39e-06	1
S100A10	1.96232	0.006085	7.31e-06	1
P4HA2	1.91095	0.006165	7.95e-06	1
EMP1	1.74886	0.006782	8.94e-06	1
IGFBP7	1.89717	0.006934	9.35e-06	1
ANXA1	1.76585	0.007085	9.76e-06	1
HBD	1.86289	0.007583	1.07e-05	1
CHORDC1	1.86846	0.009001	1.29e-05	1
SLC14A1	1.61551	0.009494	1.39e-05	1
DNAJA1P5	1.87864	0.009506	1.48e-05	1
S100A6	1.93424	0.009556	1.46e-05	1
ANXA2	1.70387	0.01034	1.79e-05	1
CD163	1.76367	0.01037	1.76e-05	1
MGST1	1.87688	0.01042	1.68e-05	1
SPR	1.80603	0.01047	1.72e-05	1
PALLD	1.85219	0.01048	1.66e-05	1
S100A9	1.51561	0.01052	1.76e-05	1
SNORD17	1.87406	0.01075	1.89e-05	1
RFTN1	1.66279	0.01179	2.11e-05	1
TUBB6	1.71939	0.01194	2.21e-05	1
RMRP	1.83083	0.01225	2.33e-05	1
CHRM4	1.81291	0.01232	2.31e-05	1
DNAJA1	1.89358	0.0133	2.57e-05	1
HLA-DQB1	1.76866	0.01336	2.62e-05	1
SNORA73A	1.8305	0.01398	2.79e-05	1
CXCR4	1.58078	0.01427	2.88e-05	1
SLCO4A1	1.5758	0.01557	3.19e-05	1
LOC100653210	1.88573	0.01658	3.5e-05	1
IFITM1	1.7854	0.01799	3.95e-05	1
CP	1.67954	0.01812	3.93e-05	1
TMTC1	1.74034	0.01818	4.05e-05	1
RPPH1	1.71792	0.01833	4.14e-05	1
S1PR3	1.79211	0.02018	4.61e-05	1
MRPS6	1.85701	0.02075	4.8e-05	1
HSPB1	1.85494	0.02076	4.87e-05	1
DCN	1.76491	0.02201	5.23e-05	1
TAGLN2	1.78508	0.023	5.53e-05	1
IGJ	1.76149	0.02326	5.73e-05	1
ANGPT2	1.70184	0.02331	5.81e-05	1
S100A12	1.37099	0.02409	6.28e-05	1
VIM	1.69808	0.02412	6.22e-05	1
DTNA	1.74277	0.02427	6.47e-05	1
IGLL1	1.95313	0.02439	6.22e-05	1
HTATIP2	1.74277	0.02444	6.44e-05	1
GPX3	1.70707	0.02449	6.68e-05	1
LOC96610	1.82849	0.02451	6.61e-05	1
CACYBP	1.80115	0.02704	7.53e-05	1
SNAR-A3	1.56937	0.02744	7.96e-05	1
PRKX	1.6518	0.0275	7.82e-05	1
FAM46C	1.78031	0.02756	7.91e-05	1
CCL2	1.28866	0.0288	8.52e-05	1
CAV1	1.77305	0.02993	8.95e-05	1
LGALS3	1.7343	0.03021	9.12e-05	1
C10orf105	1.47319	0.0306	9.33e-05	1
C11orf96	1.46349	0.03212	9.88e-05	1
RNU105A	1.79501	0.0324	0.0001006	1
RAB13	1.71851	0.0337	0.0001067	1
HSP90AB5P	1.68265	0.03401	0.0001066	1
RASD1	1.46994	0.03642	0.0001174	1
AHSA2	1.6518	0.03799	0.0001258	1
LRRD1	1.48214	0.0383	0.0001257	1
APOLD1	1.54991	0.03908	0.0001306	1
HLA-DRB5	1.29483	0.03943	0.0001329	1
TIMP1	1.65645	0.03962	0.0001405	1
CFI	1.71028	0.03965	0.0001418	1
ANGPT1	1.56006	0.03977	0.0001399	1
ADAMTS18	1.09218	0.0398	0.0001388	1
PIRT	1.68124	0.03991	0.000145	1
HSP90AB1	1.70097	0.03991	0.000138	1
SLAMF8	1.6488	0.03992	0.0001357	1
PGM2L1	1.49566	0.04013	0.0001376	1
CASP7	1.6975	0.04016	0.0001471	1
MKNK2	1.58705	0.04066	0.0001501	1
C4B	1.55207	0.04104	0.0001551	1
ANO6	1.71057	0.04105	0.0001527	1
C1S	1.61603	0.04106	0.000154	1
AQP4	1.59617	0.04229	0.0001611	1
MAPK4	1.67364	0.04277	0.0001667	1
MSR1	1.56323	0.04289	0.0001659	1
CDKN2C	1.67252	0.04316	0.0001657	1
TNFRSF12A	1.54799	0.04441	0.0001757	1
AHSA1	1.77841	0.04941	0.0001969	1
HSPA4L	1.69319	0.04982	0.0002	1
TTR	0.261917	2.82e-05	8.27e-10	-1
CCL3	0.46729	0.04763	2.79e-06	-1

## Sheet: GSE131282
Gene	FC	q.Value	p.Value	Direction
LOC340529	3.30579	2.76e-13	5.74e-18	1
HLA-DRB1	2.85714	3.85e-12	1.6e-16	1
HLA-DRB5	2.6976	3.61e-11	2.25e-15	1
CPNE1	2.91121	5.53e-11	4.59e-15	1
ATP5EP2	2.73299	3.41e-10	3.55e-14	1
EVI2A	2.0903	5.99e-09	7.47e-13	1
SPRN	2.31214	8.54e-08	1.24e-11	1
FRMPD2L1	2.16029	1.02e-07	2.13e-11	1
C1QTNF4	2.27739	1.43e-07	3.26e-11	1
B4GALT2	2.23065	1.99e-07	5.8e-11	1
PTPRA	2.23664	2.6e-07	8.65e-11	1
COL4A3	2.18675	2.75e-07	8.59e-11	1
NPAS4	2.16544	3.05e-07	1.08e-10	1
FKBP2	2.14731	3.37e-07	1.26e-10	1
STMN1	2.06016	3.39e-07	1.34e-10	1
TCEB2	2.16403	3.43e-07	1.43e-10	1
NRARP	2.18341	3.44e-07	1.5e-10	1
IL12RB2	2.14041	5.02e-07	2.4e-10	1
CPVL	1.85357	5.37e-07	2.68e-10	1
GRP	2.10393	7.63e-07	4.13e-10	1
BDNF	2.14684	1e-06	5.85e-10	1
HLA-F	2.0803	1.11e-06	7.15e-10	1
LYPD6B	2.06612	1.11e-06	6.72e-10	1
TMEM25	1.4979	1.13e-06	7.06e-10	1
NRXN2	2.11149	1.15e-06	8.11e-10	1
HCK	2.02306	1.23e-06	9.2e-10	1
FST	2.03335	1.41e-06	1.08e-09	1
PSMB9	2.05128	1.44e-06	1.13e-09	1
CENPP	2.06313	1.53e-06	1.24e-09	1
MGC39900	2.0496	1.54e-06	1.28e-09	1
EYA4	2.04499	1.61e-06	1.37e-09	1
AKAP10	2.0429	1.89e-06	1.69e-09	1
CEP250	2.03874	1.92e-06	1.68e-09	1
SOHLH2	2.00441	2.02e-06	1.85e-09	1
PTPN18	2.07641	2.02e-06	1.93e-09	1
MUCL1	2.02224	2.19e-06	2.23e-09	1
GSTM5	1.99283	2.69e-06	3.24e-09	1
BEND3	1.99641	2.72e-06	3.22e-09	1
MED24	1.43802	2.73e-06	2.89e-09	1
MGA	1.98926	2.75e-06	3.2e-09	1
LST1	1.98177	2.79e-06	3.19e-09	1
SMAGP	1.99681	2.8e-06	3.44e-09	1
TASP1	2.01086	2.83e-06	3.17e-09	1
TACR3	2.02224	2.83e-06	3.12e-09	1
CXorf64	2.01005	2.93e-06	3.65e-09	1
EEF1B2	1.98649	3.14e-06	4.05e-09	1
MIR564	1.98689	3.21e-06	4.4e-09	1
ACOT2	1.96309	3.24e-06	4.31e-09	1
SP8	1.94818	3.24e-06	4.25e-09	1
VASP	1.96618	3.25e-06	4.39e-09	1
ZNF831	2.0016	3.35e-06	4.67e-09	1
LHX6	1.97981	3.47e-06	4.97e-09	1
SYT6	1.96502	3.62e-06	5.34e-09	1
HAS1	1.95733	3.65e-06	5.31e-09	1
CA10	1.91681	3.83e-06	5.73e-09	1
C6orf174	1.93686	3.89e-06	5.9e-09	1
C14orf121	1.98886	3.96e-06	6.18e-09	1
S100A9	1.84468	3.97e-06	6.27e-09	1
MGAT4B	1.93986	3.98e-06	6.13e-09	1
NCAPG2	1.91278	4.14e-06	6.62e-09	1
ZNF706	1.95236	4.16e-06	6.74e-09	1
MAD2L1BP	1.94288	4.45e-06	7.39e-09	1
FRMPD2L2	1.8943	4.47e-06	7.34e-09	1
CSAG1	1.92864	5.07e-06	8.54e-09	1
LOC653602	1.94477	5.59e-06	9.53e-09	1
LDB3	2.04666	5.64e-06	9.74e-09	1
PPM1G	1.96232	6.08e-06	1.09e-08	1
FAM26C	1.90949	6.09e-06	1.13e-08	1
HIST1H2BK	1.9305	6.14e-06	1.07e-08	1
USMG5	1.81951	6.77e-06	1.31e-08	1
APLP2	1.94288	6.83e-06	1.29e-08	1
GOLT1A	1.80668	6.88e-06	1.29e-08	1
MYH11	1.85701	7.03e-06	1.39e-08	1
P4HA2	1.92641	7.1e-06	1.39e-08	1
USP1	1.93949	7.52e-06	1.5e-08	1
BHMT	1.87723	7.52e-06	1.53e-08	1
CABP1	1.90186	7.55e-06	1.55e-08	1
GSTT2	1.93162	7.67e-06	1.6e-08	1
RET	1.91168	7.8e-06	1.64e-08	1
NPY2R	1.8622	7.86e-06	1.72e-08	1
KIAA0895L	1.90767	7.89e-06	1.71e-08	1
BRI3BP	1.91644	7.95e-06	1.69e-08	1
SGSM1	1.92493	8.5e-06	1.87e-08	1
RPL8	1.86498	9.01e-06	2.01e-08	1
GALNTL6	1.80832	9.47e-06	2.13e-08	1
PPP4R1L	1.89036	9.58e-06	2.17e-08	1
SLC25A24	1.88679	9.75e-06	2.25e-08	1
GPR6	1.77841	9.76e-06	2.23e-08	1
MFSD2	1.88679	9.85e-06	2.29e-08	1
LUZP6	1.89072	9.99e-06	2.35e-08	1
SDHAF1	1.86916	1.01e-05	2.39e-08	1
LAMA3	1.89215	1.09e-05	2.63e-08	1
SRC	1.89897	1.09e-05	2.6e-08	1
ACCN4	1.87547	1.09e-05	2.66e-08	1
FLJ30058	1.85288	1.15e-05	2.83e-08	1
IL1RL1	1.57159	1.16e-05	2.91e-08	1
RASSF1	1.87266	1.16e-05	2.9e-08	1
APBB1	1.86463	1.19e-05	3.02e-08	1
ZNF236	1.85288	1.25e-05	3.21e-08	1
DALRD3	1.88857	1.29e-05	3.34e-08	1
CACNA2D4	1.7319	1.33e-05	3.47e-08	1
PDE6H	1.81061	1.35e-05	3.55e-08	1
CTCF	1.86986	1.35e-05	3.59e-08	1
TCTE3	1.81094	1.41e-05	3.78e-08	1
BAD	1.89179	1.42e-05	3.84e-08	1
TEAD4	1.80148	1.44e-05	4.03e-08	1
PHC2	1.87126	1.45e-05	4e-08	1
OAS1	1.88218	1.45e-05	3.99e-08	1
GPR125	1.85014	1.46e-05	3.96e-08	1
TRA1P2	1.84128	1.48e-05	4.25e-08	1
DUSP9	1.84638	1.48e-05	4.19e-08	1
HBG2	1.82548	1.49e-05	4.24e-08	1
TFR2	1.85943	1.58e-05	4.55e-08	1
RAE1	1.82515	1.66e-05	4.84e-08	1
BAT4	1.85219	1.67e-05	4.9e-08	1
PTHLH	1.84366	1.69e-05	5.01e-08	1
CHRNA4	1.87864	1.7e-05	5.35e-08	1
GPR4	1.4817	1.71e-05	5.15e-08	1
BLOC1S2	1.83756	1.71e-05	5.18e-08	1
RPLP0	1.82249	1.71e-05	5.23e-08	1
C7orf20	1.84536	1.71e-05	5.34e-08	1
ITGAL	1.83756	1.72e-05	5.32e-08	1
FAM78A	1.83756	1.72e-05	5.14e-08	1
LPPR3	1.83318	1.73e-05	5.45e-08	1
WDR3	1.84094	1.8e-05	5.72e-08	1
C1QTNF9B	1.83824	1.84e-05	6.01e-08	1
CCDC5	1.84264	1.85e-05	6e-08	1
C17orf106	1.86706	1.86e-05	5.99e-08	1
C21orf128	1.83385	1.87e-05	5.98e-08	1
ZNF74	1.83688	1.87e-05	6.19e-08	1
ACYP2	1.82983	1.87e-05	6.15e-08	1
MATR3	1.84366	1.89e-05	6.33e-08	1
VWA1	1.84502	1.9e-05	6.38e-08	1
FRAT1	1.81127	1.96e-05	6.65e-08	1
SLC35E4	1.82315	1.98e-05	6.79e-08	1
KCNH5	1.844	1.98e-05	6.75e-08	1
KCNMB2	1.81357	2.01e-05	6.94e-08	1
C5orf34	1.80636	2.01e-05	6.98e-08	1
CHMP2A	1.82249	2.04e-05	7.12e-08	1
HOPX	1.82315	2.04e-05	7.3e-08	1
ST20	1.83083	2.05e-05	7.29e-08	1
FPR1	1.71527	2.05e-05	7.21e-08	1
POU2F1	1.81951	2.06e-05	7.26e-08	1
HDC	1.78731	2.12e-05	7.65e-08	1
PTTG3P	1.77148	2.12e-05	7.64e-08	1
HLA-A29.1	1.25016	2.17e-05	8e-08	1
NLRC4	1.82017	2.2e-05	8.13e-08	1
RGS10	1.80636	2.21e-05	8.27e-08	1
RNF43	1.80766	2.22e-05	8.25e-08	1
PCTK1	1.78923	2.23e-05	8.43e-08	1
EIF3CL	1.81818	2.23e-05	8.49e-08	1
MPV17L2	1.82682	2.24e-05	8.41e-08	1
GMEB1	1.79953	2.41e-05	9.31e-08	1
EMID2	1.79533	2.42e-05	9.3e-08	1
CPT1B	1.80375	2.5e-05	9.71e-08	1
MEN1	1.81884	2.51e-05	9.8e-08	1
RGAG1	1.82116	2.69e-05	1.07e-07	1
GPR12	1.80995	2.78e-05	1.12e-07	1
RNASE4	1.76274	2.82e-05	1.15e-07	1
TNMD	1.82482	2.83e-05	1.16e-07	1
FAM19A4	1.81159	2.83e-05	1.15e-07	1
C9orf3	1.80963	2.88e-05	1.19e-07	1
MMP15	1.78795	3.05e-05	1.27e-07	1
C8orf31	1.80473	3.06e-05	1.28e-07	1
TMEM132E	1.80278	3.14e-05	1.33e-07	1
RPS26	1.75994	3.14e-05	1.32e-07	1
CTU2	1.81159	3.19e-05	1.36e-07	1
DPH3	1.7854	3.2e-05	1.36e-07	1
LMOD1	1.8031	3.21e-05	1.37e-07	1
TMUB2	1.76523	3.24e-05	1.4e-07	1
CHRNA1	1.74764	3.26e-05	1.41e-07	1
LTBP4	1.73702	3.32e-05	1.45e-07	1
ZNF710	1.80799	3.4e-05	1.49e-07	1
GRID2	1.78508	3.41e-05	1.51e-07	1
INCENP	1.78508	3.55e-05	1.57e-07	1
CBLN4	1.67532	3.55e-05	1.58e-07	1
NDRG4	1.78795	3.69e-05	1.65e-07	1
LY6H	1.734	3.7e-05	1.66e-07	1
SLC26A8	1.77305	3.75e-05	1.69e-07	1
C17orf87	1.75377	3.87e-05	1.79e-07	1
EDA	1.76897	3.87e-05	1.77e-07	1
RGPD6	1.77274	3.87e-05	1.78e-07	1
GNPTAB	1.76897	3.87e-05	1.8e-07	1
RPS7	1.68095	3.88e-05	1.76e-07	1
ZNF174	1.78158	3.88e-05	1.79e-07	1
SYCE1	1.78063	3.91e-05	1.85e-07	1
SPON2	1.80018	3.91e-05	1.84e-07	1
SNORA56	1.76491	3.93e-05	1.86e-07	1
C7orf52	1.80571	3.97e-05	1.91e-07	1
C2orf88	1.75009	3.97e-05	1.94e-07	1
ARHGAP6	1.78063	3.98e-05	1.9e-07	1
DMRT3	1.74978	3.98e-05	1.94e-07	1
ARC	1.77148	3.99e-05	1.9e-07	1
C10orf2	1.7671	3.99e-05	1.93e-07	1
ADAM28	1.755	4e-05	1.93e-07	1
FZD1	1.76367	4.02e-05	2.02e-07	1
MAGED1	1.76678	4.03e-05	1.99e-07	1
GNB5	1.73732	4.04e-05	2.01e-07	1
MAP1LC3A	1.79019	4.04e-05	1.99e-07	1
BATF3	1.76149	4.04e-05	2.01e-07	1
CNTD1	1.77873	4.05e-05	1.99e-07	1
MS4A8B	1.77494	4.11e-05	2.12e-07	1
CCNE1	1.76211	4.13e-05	2.11e-07	1
LOC729234	1.77999	4.14e-05	2.11e-07	1
UCK1	1.7762	4.17e-05	2.18e-07	1
NRG2	1.74978	4.18e-05	2.19e-07	1
PHRF1	1.78763	4.19e-05	2.18e-07	1
RASSF5	1.76025	4.25e-05	2.24e-07	1
C2orf65	1.77117	4.35e-05	2.31e-07	1
RPL36	1.76897	4.36e-05	2.32e-07	1
SOX3	1.76149	4.38e-05	2.34e-07	1
BICC1	1.77525	4.39e-05	2.35e-07	1
SSH1	1.72295	4.4e-05	2.37e-07	1
GPR173	1.77179	4.41e-05	2.38e-07	1
BRIP1	1.76149	4.45e-05	2.41e-07	1
GDF1	1.7696	4.61e-05	2.51e-07	1
XRN2	1.05009	4.79e-05	2.64e-07	1
SOX1	1.77431	4.86e-05	2.69e-07	1
LOC285016	1.71145	5.04e-05	2.8e-07	1
KIAA0492	1.7343	5.12e-05	2.9e-07	1
LSM12	1.73792	5.13e-05	2.88e-07	1
GPR27	1.74459	5.14e-05	2.89e-07	1
TIMM44	1.75469	5.14e-05	2.92e-07	1
KRT5	1.7328	5.14e-05	2.87e-07	1
HTR2C	1.7449	5.15e-05	2.87e-07	1
CTGLF1	1.75531	5.24e-05	2.99e-07	1
CECR5	1.74186	5.26e-05	3.02e-07	1
TNXB	1.79921	5.28e-05	3.02e-07	1
AURKA	1.73521	5.31e-05	3.06e-07	1
CDGAP	1.69952	5.35e-05	3.09e-07	1
TIMP4	1.75408	5.45e-05	3.16e-07	1
CCDC62	1.76554	5.49e-05	3.21e-07	1
DLGAP4	1.77336	5.51e-05	3.24e-07	1
AGPAT3	1.77085	5.58e-05	3.32e-07	1
NBLA00301	1.74917	5.58e-05	3.34e-07	1
LOC728620	1.76025	5.61e-05	3.37e-07	1
THAP4	1.74459	5.66e-05	3.41e-07	1
SLC2A9	1.74672	5.67e-05	3.43e-07	1
SH3BGR	1.7298	5.7e-05	3.46e-07	1
KRI1	1.74703	5.75e-05	3.5e-07	1
ARHGAP19	1.75685	5.79e-05	3.54e-07	1
CENPV	1.72861	5.88e-05	3.61e-07	1
SGTB	1.08436	5.88e-05	3.62e-07	1
NUDT1	1.73491	5.93e-05	3.66e-07	1
DDX58	1.71703	6.11e-05	3.8e-07	1
PCDHA13	1.7337	6.12e-05	3.79e-07	1
ZNF668	1.72712	6.15e-05	3.86e-07	1
EIF2S2	1.7328	6.18e-05	3.86e-07	1
ADAM15	1.75009	6.2e-05	3.91e-07	1
HK1	1.7138	6.3e-05	3.98e-07	1
PMS2	1.7343	6.33e-05	4.03e-07	1
TAF12	1.71585	6.34e-05	4.02e-07	1
LANCL3	1.70823	6.43e-05	4.2e-07	1
ALDH1A2	1.70416	6.44e-05	4.19e-07	1
BCR	1.7188	6.46e-05	4.18e-07	1
DDX19B	1.74459	6.48e-05	4.13e-07	1
CD97	1.73762	6.49e-05	4.17e-07	1
LOC389813	1.74764	6.49e-05	4.25e-07	1
MOV10	1.72831	6.53e-05	4.3e-07	1
KIAA0408	1.71527	6.54e-05	4.32e-07	1
GSG1L	1.78317	6.61e-05	4.38e-07	1
WDR89	1.72503	6.62e-05	4.41e-07	1
IL34	1.74825	6.81e-05	4.54e-07	1
HBQ1	1.73702	6.85e-05	4.59e-07	1
LPCAT4	1.73551	6.94e-05	4.66e-07	1
EGFL7	1.71585	6.98e-05	4.7e-07	1
PHTF2	1.72028	7.1e-05	4.8e-07	1
VAX2	1.72533	7.15e-05	4.84e-07	1
RDH5	1.72058	7.24e-05	4.94e-07	1
C18orf25	1.72087	7.25e-05	4.93e-07	1
IPPK	1.72295	7.37e-05	5.04e-07	1
HS3ST3B1	1.67729	7.37e-05	5.1e-07	1
MRPS11	1.70823	7.37e-05	5.06e-07	1
CCDC127	1.72563	7.39e-05	5.1e-07	1
ZFP64	1.73853	7.44e-05	5.17e-07	1
MAGEA10	1.71792	7.53e-05	5.24e-07	1
RTBDN	1.70823	7.53e-05	5.26e-07	1
LMNB2	1.68947	7.76e-05	5.45e-07	1
CNN1	1.71792	7.82e-05	5.51e-07	1
AK3L1	1.73551	7.82e-05	5.52e-07	1
KIAA1407	1.69348	7.82e-05	5.54e-07	1
GDPD5	1.70242	7.91e-05	5.63e-07	1
SORBS3	1.7059	7.94e-05	5.66e-07	1
RTN4RL2	1.71703	7.94e-05	5.68e-07	1
CACNA1B	1.69722	7.96e-05	5.71e-07	1
HBG1	1.69924	8.04e-05	5.78e-07	1
C1orf83	1.71174	8.12e-05	5.86e-07	1
ADK	1.70619	8.13e-05	5.9e-07	1
ZNF530	1.70969	8.14e-05	6.03e-07	1
ZNF826	1.71204	8.15e-05	6.02e-07	1
FBXL21	1.69837	8.16e-05	5.98e-07	1
LOC400120	1.58479	8.43e-05	6.29e-07	1
PGA5	1.69176	8.43e-05	6.28e-07	1
STYXL1	1.70532	8.59e-05	6.43e-07	1
ASAH1	1.70155	8.64e-05	6.49e-07	1
MRPS34	1.70999	8.65e-05	6.51e-07	1
DBI	1.69005	8.67e-05	6.54e-07	1
PSMG4	1.6714	8.69e-05	6.58e-07	1
EGR3	1.72921	8.85e-05	6.72e-07	1
HIST3H2A	1.69005	8.88e-05	6.78e-07	1
KLK6	1.68748	8.96e-05	6.85e-07	1
TMEM27	1.65426	9.01e-05	6.91e-07	1
MIR663B	1.72533	9.07e-05	7.07e-07	1
ELK3	1.68719	9.08e-05	7.02e-07	1
LOC286512	1.65044	9.09e-05	7.01e-07	1
POLR1A	1.70242	9.11e-05	7.01e-07	1
MYCN	1.70416	9.11e-05	7.14e-07	1
ABCB8	1.71174	9.17e-05	7.2e-07	1
TMEM233	1.55135	9.27e-05	7.4e-07	1
ALOX5	1.62946	9.27e-05	7.44e-07	1
CCDC94	1.69837	9.27e-05	7.35e-07	1
UBTF	1.74004	9.28e-05	7.39e-07	1
PROK2	1.70532	9.28e-05	7.31e-07	1
PDRG1	1.68805	9.29e-05	7.47e-07	1
NUP50	1.66973	9.29e-05	7.44e-07	1
C4orf21	1.66778	9.34e-05	7.59e-07	1
F8	1.69981	9.35e-05	7.54e-07	1
KLK7	1.38122	9.37e-05	7.59e-07	1
PSPH	1.68976	9.38e-05	7.59e-07	1
SPRED3	1.7307	9.43e-05	7.7e-07	1
FOXO3	1.70068	9.43e-05	7.8e-07	1
C19orf12	1.70503	9.43e-05	7.73e-07	1
SLC22A6	1.7337	9.44e-05	7.79e-07	1
CLK2	1.68748	9.44e-05	7.77e-07	1
C21orf119	1.6952	9.46e-05	7.77e-07	1
ASB12	1.70097	9.51e-05	7.93e-07	1
KIAA1026	1.65728	9.52e-05	7.92e-07	1
NTN5	1.72087	9.53e-05	7.96e-07	1
CCNA1	1.64772	9.62e-05	8.1e-07	1
KIRREL3	1.70765	9.63e-05	8.13e-07	1
SERPINA7	1.68719	9.66e-05	8.17e-07	1
ASGR2	1.68719	9.67e-05	8.2e-07	1
GTF2H2D	1.6909	9.77e-05	8.33e-07	1
TRIM7	1.68011	9.79e-05	8.33e-07	1
KIF2A	1.67645	9.89e-05	8.47e-07	1
TCF20	1.70271	9.94e-05	8.53e-07	1
ADAMTS2	1.66639	9.98e-05	8.61e-07	1
HCG4	1.55715	0.0001003	8.69e-07	1
B3GAT1	1.69664	0.0001012	8.79e-07	1
FHL2	1.71409	0.0001014	8.85e-07	1
TNFRSF6B	1.53941	0.0001017	8.9e-07	1
VIT	1.69434	0.0001032	9.09e-07	1
RDH12	1.68464	0.0001033	9.13e-07	1
SIRT6	1.68095	0.0001046	9.3e-07	1
CACYBP	1.64447	0.0001046	9.26e-07	1
FADS2	1.63212	0.0001054	9.47e-07	1
EXOC2	1.64772	0.0001055	9.43e-07	1
FAM20C	1.6909	0.0001055	9.46e-07	1
MLXIP	1.68691	0.0001057	9.51e-07	1
ARHGAP30	1.68947	0.0001072	9.69e-07	1
MYO19	1.69176	0.0001074	9.74e-07	1
LAMA1	1.64745	0.0001081	9.86e-07	1
MGP	1.71615	0.0001081	9.89e-07	1
MIR604	1.6852	0.0001092	1.01e-06	1
KIF4A	1.68663	0.0001093	1e-06	1
TYROBP	1.65536	0.00011	1.02e-06	1
TCOF1	1.68492	0.00011	1.02e-06	1
LOC375323	1.68322	0.00011	1.02e-06	1
STAP2	1.69664	0.0001103	1.03e-06	1
APRT	1.68011	0.0001105	1.03e-06	1
ETF1	1.67757	0.0001113	1.05e-06	1
LGR5	1.6889	0.0001115	1.04e-06	1
IL8	1.61551	0.0001122	1.06e-06	1
ZNF702P	1.64042	0.0001124	1.06e-06	1
ELMOD1	1.45985	0.0001129	1.07e-06	1
NOB1	1.66223	0.0001146	1.09e-06	1
ATG9B	1.69377	0.0001158	1.11e-06	1
GRINL1A	1.66556	0.0001165	1.11e-06	1
PANK1	1.6742	0.0001168	1.12e-06	1
THG1L	1.60643	0.000117	1.13e-06	1
PPAP2B	1.69291	0.0001179	1.14e-06	1
RPP38	1.68805	0.0001182	1.14e-06	1
MAGEC3	1.67926	0.0001192	1.15e-06	1
PTPLA	1.65782	0.0001193	1.16e-06	1
HYAL2	1.66417	0.0001209	1.19e-06	1
SCARA5	1.66113	0.000121	1.19e-06	1
FAM153A	1.72503	0.0001212	1.18e-06	1
IL6	1.53092	0.0001215	1.19e-06	1
DBH	1.69377	0.0001228	1.21e-06	1
LOR	1.68237	0.0001234	1.22e-06	1
NAPSB	1.66861	0.0001235	1.22e-06	1
FLT3LG	1.66168	0.0001236	1.23e-06	1
ANO1	1.66085	0.0001242	1.24e-06	1
GPX5	1.58328	0.000125	1.25e-06	1
PYGM	1.61447	0.000125	1.25e-06	1
FKBP1P1	1.68719	0.0001253	1.26e-06	1
TMEM88	1.67616	0.0001258	1.26e-06	1
SERPINB2	1.65044	0.0001262	1.28e-06	1
MAGEF1	1.63934	0.0001262	1.28e-06	1
SLC36A2	1.6852	0.0001263	1.27e-06	1
CIDEA	1.68095	0.0001264	1.27e-06	1
ABCC1	1.69348	0.0001265	1.28e-06	1
DPH1	1.66445	0.000128	1.3e-06	1
MAP3K15	1.6728	0.0001284	1.31e-06	1
KIAA1432	1.657	0.0001323	1.35e-06	1
USP2	1.66611	0.0001325	1.36e-06	1
ZNF350	1.65453	0.0001334	1.38e-06	1
UGT2B7	1.54823	0.0001335	1.37e-06	1
FAM83H	1.67336	0.0001357	1.42e-06	1
MIR612	1.64908	0.0001358	1.41e-06	1
ZNHIT3	1.68011	0.0001358	1.41e-06	1
MED16	1.63666	0.000136	1.42e-06	1
C4orf44	1.66003	0.0001361	1.42e-06	1
DVL1	1.66583	0.0001366	1.43e-06	1
ZFYVE9	1.60539	0.0001366	1.44e-06	1
SSPO	1.67364	0.0001369	1.45e-06	1
DHRS12	1.65317	0.0001369	1.44e-06	1
OR4K14	1.63613	0.000137	1.45e-06	1
ARFGAP1	1.66889	0.0001371	1.46e-06	1
LOC399744	1.71174	0.0001371	1.46e-06	1
ENTPD6	1.6756	0.0001372	1.46e-06	1
ZNF367	1.64501	0.0001376	1.47e-06	1
SLC25A21	1.65481	0.0001384	1.48e-06	1
C16orf70	1.6518	0.0001384	1.49e-06	1
CA12	1.60385	0.0001386	1.49e-06	1
MAGEE2	1.65508	0.000139	1.5e-06	1
CD84	1.64501	0.0001402	1.52e-06	1
FARS2	1.64718	0.0001439	1.56e-06	1
ABL2	1.65453	0.0001446	1.58e-06	1
INF2	1.6714	0.0001448	1.58e-06	1
PHF11	1.66806	0.0001449	1.58e-06	1
APTX	1.65453	0.0001462	1.6e-06	1
ZNF688	1.66973	0.0001473	1.62e-06	1
NRF1	1.67813	0.0001473	1.62e-06	1
LOC649864	1.66334	0.0001475	1.62e-06	1
EXTL3	1.64799	0.0001481	1.64e-06	1
AGRN	1.67588	0.0001487	1.65e-06	1
AGPAT1	1.67448	0.0001489	1.65e-06	1
RPL32P3	1.67392	0.0001503	1.67e-06	1
HPS1	1.6488	0.0001521	1.7e-06	1
MOCS2	1.64177	0.0001543	1.72e-06	1
AP3M1	1.63988	0.0001543	1.73e-06	1
TCEB3C	1.42694	0.0001544	1.73e-06	1
ERCC1	1.63559	0.0001559	1.75e-06	1
NR3C1	1.64501	0.0001571	1.78e-06	1
HBEGF	1.66334	0.0001572	1.77e-06	1
CAND2	1.66806	0.0001572	1.77e-06	1
GEMIN8	1.5625	0.0001585	1.8e-06	1
KCNH2	1.68719	0.000159	1.81e-06	1
CAPN9	1.61264	0.0001592	1.82e-06	1
C20orf26	1.66667	0.0001592	1.81e-06	1
UCP2	1.6469	0.0001597	1.83e-06	1
MED8	1.63881	0.0001639	1.88e-06	1
MIR874	1.6675	0.0001641	1.88e-06	1
MIR761	1.64042	0.000165	1.9e-06	1
FRG2C	1.65865	0.0001671	1.93e-06	1
GIPC1	1.64555	0.0001681	1.94e-06	1
SLC7A3	1.62946	0.0001686	1.96e-06	1
C10orf113	1.65426	0.0001688	1.96e-06	1
CHRDL2	1.68748	0.0001695	1.97e-06	1
NSUN5C	1.65948	0.000171	1.99e-06	1
CDH3	1.63586	0.0001712	1.99e-06	1
ZNF334	1.66058	0.0001748	2.05e-06	1
KIAA0802	1.64042	0.0001749	2.05e-06	1
C5orf25	1.64745	0.0001751	2.06e-06	1
SPIN2B	1.69033	0.0001781	2.1e-06	1
PTP4A2	1.63506	0.0001794	2.13e-06	1
GSTT1	1.43123	0.0001799	2.14e-06	1
TRIM65	1.638	0.0001801	2.14e-06	1
INVS	1.64204	0.0001856	2.22e-06	1
HSPBP1	1.62734	0.0001857	2.22e-06	1
MIA3	1.6239	0.0001858	2.24e-06	1
LOC92154	1.63479	0.0001859	2.24e-06	1
HSPD1	1.64231	0.000186	2.24e-06	1
PRIC285	1.63159	0.0001862	2.25e-06	1
TRHDE	1.67168	0.0001863	2.24e-06	1
PHF19	1.65344	0.0001865	2.24e-06	1
SLC32A1	1.52882	0.0001868	2.24e-06	1
FLJ46838	1.65371	0.0001873	2.27e-06	1
MAF	1.58881	0.0001874	2.28e-06	1
KLK5	1.638	0.0001893	2.31e-06	1
FLJ41649	1.62285	0.0001895	2.3e-06	1
KCNAB2	1.638	0.0001925	2.35e-06	1
TP53I3	1.64962	0.0001938	2.39e-06	1
DPP9	1.64177	0.0001939	2.38e-06	1
GEMIN5	1.6176	0.000194	2.38e-06	1
TMEM110	1.65317	0.0001942	2.39e-06	1
NDUFA7	1.58278	0.0001945	2.41e-06	1
SLN	1.52045	0.0001946	2.4e-06	1
LOC729399	1.58403	0.0001947	2.42e-06	1
OR5AR1	1.58806	0.000195	2.41e-06	1
WTIP	1.64015	0.0001985	2.48e-06	1
DNAJB5	1.63506	0.0002012	2.52e-06	1
EXT1	1.62946	0.0002015	2.53e-06	1
C5orf36	1.63452	0.0002016	2.53e-06	1
ZMAT5	1.63613	0.0002019	2.54e-06	1
NBR1	1.63345	0.0002026	2.55e-06	1
GHRL	1.62048	0.0002031	2.56e-06	1
TBL3	1.64123	0.0002038	2.58e-06	1
SERPINB8	1.63908	0.0002039	2.59e-06	1
CSAG3A	1.65782	0.0002046	2.6e-06	1
MBLAC1	1.62417	0.0002056	2.62e-06	1
PIWIL2	1.63613	0.0002059	2.62e-06	1
GOLGA7	1.63586	0.000206	2.63e-06	1
SEMA3E	1.60539	0.0002064	2.64e-06	1
CSF3	1.51263	0.000207	2.66e-06	1
ANKRD5	1.62999	0.000209	2.69e-06	1
TCEAL4	1.63026	0.000209	2.69e-06	1
TREX2	1.68294	0.0002093	2.7e-06	1
LBH	1.64745	0.00021	2.71e-06	1
TACR1	1.65317	0.00021	2.72e-06	1
ZNF517	1.64339	0.0002104	2.72e-06	1
ULK1	1.62787	0.0002107	2.73e-06	1
CUX1	1.64772	0.0002119	2.76e-06	1
PAK3	1.65453	0.000212	2.76e-06	1
LOC222967	1.64258	0.0002134	2.78e-06	1
SNX15	1.65262	0.0002145	2.8e-06	1
CRH	1.51953	0.0002164	2.83e-06	1
S100A11	1.6176	0.0002165	2.83e-06	1
ZNF528	1.61917	0.0002181	2.86e-06	1
CA5BP	1.63319	0.0002188	2.88e-06	1
EIF3B	1.64745	0.0002198	2.89e-06	1
SST	1.55255	0.0002221	2.94e-06	1
PLB1	1.67757	0.0002222	2.94e-06	1
PCDHAC2	1.63345	0.0002223	2.93e-06	1
LOC441150	1.61734	0.0002234	2.96e-06	1
XAGE1A	1.63773	0.000224	2.98e-06	1
SRPK3	1.68067	0.0002253	3e-06	1
ARSB	1.61865	0.0002255	3e-06	1
FSHR	1.6728	0.0002263	3.02e-06	1
TBXAS1	1.63854	0.0002271	3.04e-06	1
EPHA3	1.64826	0.000231	3.09e-06	1
APOB	1.62575	0.0002328	3.12e-06	1
C2orf66	1.5921	0.0002334	3.14e-06	1
MAGED4B	1.63881	0.0002335	3.16e-06	1
ITGA3	1.6415	0.0002336	3.17e-06	1
ZNF503	1.64393	0.0002337	3.14e-06	1
FSTL4	1.62522	0.0002337	3.15e-06	1
ETFB	1.59693	0.0002339	3.14e-06	1
METRN	1.62946	0.0002363	3.22e-06	1
ATG16L1	1.61917	0.0002366	3.22e-06	1
PWWP2	1.64015	0.0002369	3.22e-06	1
SLC22A18	1.62787	0.0002378	3.24e-06	1
OR14C36	1.64636	0.0002422	3.31e-06	1
LYPD5	1.63479	0.0002437	3.33e-06	1
ADAMTS4	1.59388	0.0002477	3.4e-06	1
TRIM54	1.62417	0.000248	3.42e-06	1
NLF2	1.61264	0.0002482	3.41e-06	1
SCRT1	1.55739	0.0002488	3.43e-06	1
KIRREL	1.64312	0.0002501	3.46e-06	1
FCN3	1.59464	0.0002505	3.47e-06	1
ZFYVE28	1.62364	0.000251	3.48e-06	1
MPPE1	1.60643	0.0002523	3.51e-06	1
FLJ34503	1.62206	0.0002526	3.53e-06	1
STEAP2	1.5873	0.0002527	3.54e-06	1
CDK8	1.61447	0.0002546	3.58e-06	1
CYP2B7P1	1.62813	0.0002552	3.59e-06	1
FLJ45337	1.60436	0.0002553	3.6e-06	1
OR2M4	1.63666	0.0002581	3.65e-06	1
MGC2752	1.61082	0.0002584	3.66e-06	1
ZCCHC16	1.64096	0.0002594	3.68e-06	1
HM13	1.61655	0.0002599	3.71e-06	1
MXI1	1.61603	0.0002599	3.7e-06	1
C13orf36	1.48655	0.0002599	3.71e-06	1
KCNK6	1.60849	0.00026	3.72e-06	1
NCF4	1.63372	0.0002605	3.73e-06	1
GTPBP10	1.57456	0.000263	3.78e-06	1
AKIRIN1	1.59923	0.0002633	3.79e-06	1
HOMER2	1.62893	0.0002656	3.84e-06	1
WDR24	1.61342	0.0002657	3.86e-06	1
DNAJC12	1.58403	0.0002659	3.84e-06	1
LOC728666	1.60411	0.000266	3.85e-06	1
NLRP3	1.59363	0.0002663	3.85e-06	1
AKAP14	1.61786	0.0002751	4.01e-06	1
MSC	1.60798	0.0002759	4.03e-06	1
RAB17	1.60565	0.0002799	4.09e-06	1
TTC23L	1.6129	0.0002828	4.15e-06	1
ZNF639	1.62206	0.0002829	4.14e-06	1
RTEL1	1.64069	0.0002843	4.18e-06	1
KLF10	1.5977	0.0002844	4.19e-06	1
PGM5	1.63026	0.0002846	4.2e-06	1
DTNBP1	1.60927	0.0002847	4.19e-06	1
PORCN	1.59693	0.0002865	4.25e-06	1
TSTA3	1.60798	0.0002866	4.26e-06	1
RILPL2	1.60256	0.0002867	4.24e-06	1
MIR1208	1.56299	0.0002867	4.26e-06	1
HDLBP	1.61577	0.0002879	4.29e-06	1
MMP9	1.51745	0.0002888	4.3e-06	1
KCNIP3	1.59312	0.0002906	4.34e-06	1
CCDC148	1.5186	0.0002919	4.36e-06	1
NTRK1	1.60591	0.0002929	4.39e-06	1
ADSL	1.6072	0.0002931	4.39e-06	1
DNMT3A	1.60411	0.000294	4.41e-06	1
GLCCI1	1.61786	0.0002965	4.46e-06	1
SLC22A7	1.60333	0.0002968	4.48e-06	1
LOC728903	1.57978	0.0002971	4.49e-06	1
ALOX12P2	1.60411	0.0002972	4.48e-06	1
ATP5D	1.60333	0.0002976	4.5e-06	1
SBK1	1.61134	0.0002976	4.48e-06	1
FSBP	1.60927	0.0002983	4.54e-06	1
PCIF1	1.5949	0.0002985	4.55e-06	1
DCAF12L2	1.62232	0.0002986	4.56e-06	1
MYOCD	1.63052	0.0002986	4.54e-06	1
SPIN2A	1.60488	0.0002986	4.57e-06	1
RALGDS	1.62813	0.0002988	4.53e-06	1
TP53AIP1	1.57381	0.0003	4.6e-06	1
PSPN	1.63934	0.0003007	4.62e-06	1
TK1	1.62893	0.0003008	4.64e-06	1
DPP3	1.60565	0.0003009	4.63e-06	1
ENTPD4	1.59693	0.0003037	4.7e-06	1
ABCA2	1.64231	0.0003041	4.7e-06	1
HIST1H3H	1.62311	0.0003065	4.75e-06	1
NDUFA11	1.57406	0.0003075	4.78e-06	1
CBWD3	1.61186	0.0003077	4.77e-06	1
KIAA0467	1.61996	0.000311	4.84e-06	1
MFSD7	1.62206	0.0003121	4.87e-06	1
OSTN	1.54871	0.0003125	4.87e-06	1
PCDHGC4	1.61708	0.0003133	4.89e-06	1
ZSWIM3	1.61943	0.0003137	4.9e-06	1
TNFRSF12A	1.61499	0.0003155	4.94e-06	1
PMEPA1	1.60617	0.0003162	4.96e-06	1
NUAK2	1.60154	0.0003186	5e-06	1
LOC100132288	1.57704	0.0003189	5.02e-06	1
GABRG3	1.6	0.0003191	5.04e-06	1
ATP8B1	1.58028	0.0003205	5.07e-06	1
FKSG44	1.59058	0.0003208	5.07e-06	1
IL1B	1.48898	0.0003209	5.1e-06	1
HOOK2	1.61996	0.000321	5.09e-06	1
LTC4S	1.61629	0.0003212	5.09e-06	1
CRYM	1.57233	0.0003214	5.11e-06	1
DHCR7	1.57307	0.0003215	5.12e-06	1
BEND4	1.5625	0.0003268	5.21e-06	1
CBX2	1.58932	0.0003281	5.24e-06	1
OVOL2	1.56986	0.0003287	5.26e-06	1
BCAS3	1.60102	0.0003293	5.28e-06	1
GPRC5C	1.62364	0.0003295	5.27e-06	1
CHST6	1.55642	0.0003348	5.37e-06	1
CBX8	1.59693	0.0003363	5.4e-06	1
ASAH2B	1.57679	0.000337	5.42e-06	1
TICAM1	1.58831	0.0003393	5.47e-06	1
ACP6	1.52486	0.0003408	5.53e-06	1
FAM101B	1.61525	0.000341	5.5e-06	1
TDRD1	1.61603	0.000341	5.52e-06	1
NRN1L	1.59821	0.0003415	5.52e-06	1
TMEM140	1.55497	0.0003418	5.56e-06	1
SUPT6H	1.60051	0.0003427	5.59e-06	1
C13orf16	1.6072	0.0003433	5.6e-06	1
DAB1	1.58228	0.0003434	5.62e-06	1
FSHB	1.58856	0.0003437	5.63e-06	1
STAR	1.61134	0.0003453	5.66e-06	1
CEP27	1.59439	0.0003527	5.79e-06	1
MIR1251	1.58983	0.0003529	5.8e-06	1
NMUR2	1.56863	0.0003536	5.87e-06	1
CXCL12	1.52323	0.0003537	5.82e-06	1
LOC155060	1.60668	0.0003537	5.87e-06	1
P2RX4	1.5916	0.0003538	5.86e-06	1
NCRNA00181	1.62075	0.000354	5.84e-06	1
ZIC5	1.60026	0.0003542	5.86e-06	1
ZNF550	1.5916	0.0003545	5.85e-06	1
ATG9A	1.5674	0.0003548	5.9e-06	1
LOC100129211	1.56666	0.0003557	5.93e-06	1
SNRNP200	1.57604	0.0003557	5.92e-06	1
CCDC4	1.60617	0.0003648	6.09e-06	1
CALN1	1.60823	0.0003651	6.14e-06	1
PENK	1.36649	0.0003653	6.14e-06	1
LDLRAD3	1.58504	0.0003656	6.13e-06	1
VCX2	1.54083	0.0003657	6.12e-06	1
C9orf116	1.58856	0.0003667	6.21e-06	1
ST6GAL2	1.58579	0.0003668	6.2e-06	1
TRAP1	1.49566	0.0003678	6.24e-06	1
PCDHA5	1.59591	0.0003691	6.28e-06	1
LOC100130053	1.56006	0.0003694	6.27e-06	1
NPFFR2	1.58655	0.0003728	6.37e-06	1
PCA3	1.54369	0.0003748	6.42e-06	1
AGPAT2	1.45201	0.0003748	6.41e-06	1
ZNF835	1.58907	0.0003758	6.45e-06	1
KHK	1.59312	0.0003764	6.47e-06	1
CAMK2N2	1.59464	0.0003768	6.47e-06	1
SNORD94	1.48544	0.0003769	6.5e-06	1
POLD4	1.59795	0.000377	6.49e-06	1
HS6ST1	1.5916	0.0003779	6.52e-06	1
TECPR2	1.58278	0.0003791	6.55e-06	1
TMEM99	1.58328	0.0003792	6.56e-06	1
PARVG	1.53846	0.0003794	6.57e-06	1
LRDD	1.62522	0.0003808	6.6e-06	1
SARDH	1.60823	0.0003809	6.61e-06	1
ADSSL1	1.57431	0.0003815	6.63e-06	1
PBLD	1.53233	0.0003818	6.64e-06	1
EPN2	1.57878	0.0003904	6.81e-06	1
CACNG5	1.63185	0.0003911	6.83e-06	1
NUDT6	1.58128	0.0003917	6.85e-06	1
GNG13	1.5949	0.0003918	6.86e-06	1
AMPD2	1.58781	0.0003935	6.9e-06	1
TRIM36	1.55328	0.0003936	6.9e-06	1
SLC4A2	1.58203	0.0003953	6.94e-06	1
ATP11A	1.5706	0.0003962	6.97e-06	1
EFNB1	1.60051	0.0003978	7.01e-06	1
LOC201175	1.60411	0.0003981	7.02e-06	1
KLF6	1.57183	0.0003989	7.04e-06	1
CMIP	1.58203	0.0004021	7.11e-06	1
SGCG	1.56421	0.0004032	7.14e-06	1
OR4E2	1.4941	0.0004037	7.18e-06	1
C9orf140	1.53752	0.0004041	7.17e-06	1
ALAS2	1.14613	0.0004042	7.19e-06	1
XYLT1	1.56937	0.0004044	7.21e-06	1
C19orf24	1.58781	0.0004044	7.21e-06	1
TACC3	1.58378	0.000407	7.28e-06	1
VIP	1.58228	0.0004103	7.34e-06	1
RBM35A	1.57456	0.0004104	7.36e-06	1
SAMD3	1.59439	0.0004107	7.36e-06	1
C1orf66	1.57381	0.0004111	7.38e-06	1
LOC402117	1.5625	0.0004123	7.41e-06	1
HLA-DRB4	1.20091	0.0004141	7.47e-06	1
EDG7	1.52091	0.0004142	7.47e-06	1
FLJ40434	1.5873	0.0004143	7.46e-06	1
ERN1	1.57085	0.0004178	7.56e-06	1
ATP6V1E2	1.57406	0.0004181	7.55e-06	1
DNAH5	1.56961	0.0004197	7.6e-06	1
MPZL1	1.57978	0.0004201	7.62e-06	1
FITM2	1.57629	0.0004234	7.68e-06	1
SIDT1	1.43513	0.0004291	7.8e-06	1
FLJ90650	1.59515	0.0004323	7.88e-06	1
STK16	1.60256	0.0004323	7.86e-06	1
MICALCL	1.58203	0.0004324	7.87e-06	1
CCNC	1.57282	0.0004329	7.9e-06	1
2024-03-02	1.57828	0.0004335	7.92e-06	1
ELMO1	1.5748	0.0004344	7.95e-06	1
OR2AK2	1.57729	0.0004352	7.97e-06	1
NRTN	1.62443	0.0004367	8.01e-06	1
TAS2R9	1.56642	0.0004367	8.02e-06	1
HLA-DRB3	1.48655	0.0004367	8.02e-06	1
LMX1B	1.54703	0.000437	8.07e-06	1
OPN4	1.59236	0.000437	8.06e-06	1
PALB2	1.5625	0.0004375	8.06e-06	1
NPAS1	1.59109	0.0004379	8.09e-06	1
CD200R1	1.55497	0.0004379	8.06e-06	1
IL1F9	1.56666	0.0004398	8.14e-06	1
PCDHGA2	1.59795	0.0004418	8.18e-06	1
ZNF341	1.57679	0.0004441	8.24e-06	1
PCDHB11	1.56863	0.0004442	8.25e-06	1
KLHL34	1.5758	0.0004442	8.25e-06	1
LGR8	1.58203	0.0004443	8.28e-06	1
CORO6	1.56372	0.0004447	8.27e-06	1
NFIC	1.57233	0.0004453	8.3e-06	1
XAGE1	1.59261	0.0004468	8.34e-06	1
ZNF365	1.55448	0.0004469	8.35e-06	1
GCNT2	1.59439	0.0004485	8.4e-06	1
HSPC171	1.58278	0.0004487	8.4e-06	1
SPTBN4	1.58983	0.0004508	8.45e-06	1
IL17RE	1.59872	0.0004515	8.49e-06	1
PRKAB1	1.59008	0.0004515	8.48e-06	1
CCDC84	1.55812	0.0004538	8.55e-06	1
WNT16	1.57456	0.0004544	8.6e-06	1
ST3GAL4	1.56031	0.0004548	8.59e-06	1
UBE2J2	1.57257	0.0004551	8.62e-06	1
LRRC16B	1.60205	0.0004607	8.75e-06	1
ARID5A	1.55594	0.0004687	8.92e-06	1
BCAS4	1.56104	0.0004689	8.92e-06	1
GTSE1	1.59439	0.0004724	9e-06	1
ADAM32	1.58781	0.0004725	9.03e-06	1
C15orf60	1.54512	0.0004729	9.04e-06	1
DUSP21	1.58705	0.000473	9.03e-06	1
DLL3	1.57828	0.0004735	9.07e-06	1
HNRNPK	1.54991	0.0004737	9.08e-06	1
LBR	1.55594	0.0004762	9.15e-06	1
TAC3	1.58881	0.0004762	9.17e-06	1
ACY1	1.5753	0.0004764	9.16e-06	1
LOC645447	1.57778	0.0004766	9.14e-06	1
PARK2	1.56323	0.0004791	9.26e-06	1
LOC729905	1.56446	0.0004798	9.3e-06	1
C11orf67	1.54369	0.0004798	9.29e-06	1
SELP	1.57159	0.0004862	9.44e-06	1
PLAC9	1.57654	0.0004865	9.44e-06	1
ZSCAN2	1.58529	0.000487	9.47e-06	1
RCP9	1.57109	0.0004872	9.48e-06	1
TMEM16D	1.57085	0.0004875	9.5e-06	1
EPHA10	1.56568	0.0004883	9.52e-06	1
PABPC5	1.57109	0.0004886	9.54e-06	1
TXNDC11	1.56519	0.0004893	9.57e-06	1
TBXA2R	1.57778	0.0004897	9.57e-06	1
WDR46	1.53799	0.0004901	9.6e-06	1
PRKCE	1.47667	0.000492	9.66e-06	1
CUZD1	1.58932	0.000492	9.64e-06	1
CRAT	1.57431	0.0004929	9.68e-06	1
NUBP2	1.57629	0.0004939	9.72e-06	1
ANKRD24	1.5753	0.0004941	9.72e-06	1
CSAG3B	1.61917	0.0004943	9.74e-06	1
C3orf35	1.57456	0.0005	9.86e-06	1
RAB5C	1.48214	0.0005016	9.9e-06	1
LOC606724	1.55448	0.0005019	9.92e-06	1
SDC3	1.58781	0.0005023	9.94e-06	1
NCAPH2	1.58128	0.0005029	9.96e-06	1
PHLDB3	1.56299	0.0005057	1e-05	1
LOC391825	1.54297	0.0005088	1.01e-05	1
LILRB2	1.47124	0.0005113	1.02e-05	1
SLC2A5	1.50716	0.0005116	1.02e-05	1
RFFL	1.54775	0.0005119	1.02e-05	1
MAPK11	1.58554	0.0005148	1.03e-05	1
KIAA1772	1.55521	0.0005151	1.03e-05	1
CPNE5	1.54178	0.0005154	1.03e-05	1
CDKN1A	1.57035	0.0005159	1.03e-05	1
NPHP4	1.55183	0.000516	1.03e-05	1
LLGL2	1.60798	0.0005176	1.04e-05	1
DNMBP	1.56715	0.0005178	1.04e-05	1
PDE4C	1.54226	0.0005239	1.06e-05	1
SH2D4A	1.56863	0.0005264	1.06e-05	1
CLDN18	1.53139	0.0005334	1.08e-05	1
ALOX12B	1.50739	0.0005344	1.08e-05	1
ZC3H12A	1.60026	0.0005372	1.09e-05	1
TARBP2	1.5753	0.0005375	1.09e-05	1
ABCF3	1.53398	0.0005376	1.09e-05	1
PRAMEF10	1.48699	0.000538	1.09e-05	1
LOC728310	1.55063	0.00054	1.1e-05	1
UBE2I	1.57431	0.0005405	1.1e-05	1
TSPO	1.56031	0.000542	1.11e-05	1
FCGR1B	1.44217	0.0005433	1.11e-05	1
NPM3	1.5647	0.0005467	1.12e-05	1
ICA1	1.57654	0.0005475	1.12e-05	1
NCAPD3	1.54847	0.000548	1.12e-05	1
PLAG1	1.55933	0.0005574	1.15e-05	1
LRRC45	1.55594	0.0005579	1.15e-05	1
LOC492303	1.57953	0.0005582	1.15e-05	1
WWOX	1.55739	0.0005583	1.15e-05	1
STBD1	1.52952	0.0005585	1.15e-05	1
ARHGAP11A	1.56226	0.0005585	1.15e-05	1
C11orf45	1.55545	0.0005587	1.15e-05	1
POLR3H	1.55304	0.0005591	1.16e-05	1
ODF3	1.50761	0.0005599	1.16e-05	1
ADAMTSL4	1.56177	0.0005601	1.16e-05	1
ALOX15B	1.51953	0.0005604	1.17e-05	1
JAG2	1.54727	0.0005613	1.17e-05	1
DUOX1	1.52439	0.0005653	1.18e-05	1
RGS8	1.51883	0.0005672	1.18e-05	1
ZNRD1	1.56104	0.0005693	1.19e-05	1
OR8S1	1.55521	0.0005694	1.19e-05	1
SLC15A3	1.53917	0.0005718	1.2e-05	1
DGKZ	1.55594	0.0005719	1.2e-05	1
LOC642782	1.58932	0.0005719	1.2e-05	1
MCHR2	1.3914	0.0005721	1.2e-05	1
NOXO1	1.56937	0.0005721	1.2e-05	1
TRAF3IP3	1.62206	0.0005778	1.22e-05	1
SPG21	1.5528	0.0005779	1.22e-05	1
SCGB1A1	1.53728	0.0005813	1.23e-05	1
RAB7B	1.51515	0.0005834	1.24e-05	1
BAI1	1.55448	0.0005884	1.25e-05	1
LYZ	1.3988	0.0005896	1.25e-05	1
SLC11A1	1.45159	0.0005905	1.25e-05	1
DLX6AS	1.54583	0.0005934	1.26e-05	1
MAD1L1	1.56031	0.0005986	1.28e-05	1
SLC6A12	1.56986	0.0005991	1.28e-05	1
KYNU	1.54202	0.0005991	1.28e-05	1
RAPGEF1	1.5425	0.0006	1.28e-05	1
GPAA1	1.55039	0.000601	1.29e-05	1
GPAT2	1.55376	0.0006054	1.3e-05	1
C16orf71	1.56691	0.0006156	1.33e-05	1
PARP10	1.58028	0.0006158	1.33e-05	1
MRPL4	1.55159	0.0006162	1.33e-05	1
Gcom1	1.51976	0.0006164	1.33e-05	1
SCARNA20	1.58128	0.0006169	1.33e-05	1
FGFR4	1.61082	0.0006184	1.34e-05	1
TAS1R3	1.61186	0.0006215	1.35e-05	1
METRNL	1.5753	0.0006246	1.36e-05	1
PCDHB8	1.53941	0.000626	1.36e-05	1
IFRD2	1.57159	0.0006267	1.36e-05	1
P2RY4	1.56666	0.0006301	1.37e-05	1
ASFMR1	1.5706	0.0006343	1.39e-05	1
ARHGEF1	1.55424	0.0006344	1.39e-05	1
UBD	1.5387	0.0006346	1.39e-05	1
PPARA	1.5456	0.000635	1.38e-05	1
BICD2	1.54703	0.0006399	1.4e-05	1
TINAGL1	1.56887	0.0006404	1.4e-05	1
RBM4	1.55594	0.0006409	1.4e-05	1
CD320	1.5528	0.0006422	1.41e-05	1
TSPAN1	1.53988	0.0006434	1.41e-05	1
LOC400446	1.56226	0.0006454	1.42e-05	1
VPS39	1.53398	0.0006488	1.43e-05	1
LOC400464	1.55788	0.00065	1.43e-05	1
LRTM1	1.5528	0.0006559	1.45e-05	1
TMOD3	1.54871	0.0006562	1.45e-05	1
ULBP2	1.55812	0.0006576	1.45e-05	1
DUX4	1.53468	0.0006608	1.46e-05	1
USP31	1.54607	0.0006609	1.47e-05	1
COL22A1	1.48765	0.0006626	1.47e-05	1
TOR3A	1.54273	0.000668	1.48e-05	1
MRPL20	1.50921	0.0006683	1.49e-05	1
IGBP1	1.53116	0.0006768	1.51e-05	1
DHX35	1.54297	0.000677	1.51e-05	1
GRIPAP1	1.54059	0.0006781	1.51e-05	1
FAM123C	1.55569	0.0006784	1.51e-05	1
SPTY2D1	1.53304	0.0006795	1.52e-05	1
FTHL12	1.5328	0.0006804	1.52e-05	1
CRABP2	1.5186	0.0006807	1.53e-05	1
SERF1A	1.53586	0.0006807	1.53e-05	1
POPDC2	1.54226	0.0006807	1.53e-05	1
ZC4H2	1.5425	0.000685	1.54e-05	1
MIR1911	1.56642	0.000687	1.55e-05	1
C13orf39	1.39626	0.0006915	1.56e-05	1
L2HGDH	1.55087	0.000693	1.56e-05	1
LOC648718	1.54919	0.0006933	1.57e-05	1
THOC6	1.55448	0.0006947	1.57e-05	1
CLN8	1.51423	0.0007006	1.59e-05	1
PTP4A3	1.54871	0.0007021	1.59e-05	1
CD8A	1.48987	0.0007033	1.6e-05	1
WASH3P	1.55473	0.0007041	1.6e-05	1
TLE2	1.5586	0.0007042	1.6e-05	1
ALDH3A2	1.50716	0.0007069	1.61e-05	1
HELB	1.53539	0.0007105	1.62e-05	1
ACOT11	1.54464	0.0007112	1.62e-05	1
GNA15	1.54751	0.0007205	1.65e-05	1
VENTXP1	1.58479	0.0007211	1.65e-05	1
LY6D	1.51883	0.0007293	1.67e-05	1
PTS	1.49633	0.0007297	1.67e-05	1
PNRC1	1.53775	0.0007297	1.68e-05	1
NKX2-1	1.52555	0.0007314	1.68e-05	1
MBD3	1.56715	0.0007322	1.69e-05	1
GRIN1	1.5387	0.0007326	1.69e-05	1
SDCCAG3	1.55183	0.0007344	1.7e-05	1
KLK2	1.4997	0.0007371	1.7e-05	1
DISP2	1.54083	0.0007373	1.71e-05	1
C1orf95	1.5124	0.0007415	1.72e-05	1
CDCA5	1.51722	0.0007415	1.72e-05	1
CT47A6	1.60051	0.0007419	1.72e-05	1
PIGG	1.53163	0.0007421	1.73e-05	1
CNTNAP3	1.52952	0.0007426	1.73e-05	1
BOC	1.53046	0.0007513	1.75e-05	1
MTNR1A	1.54131	0.0007515	1.75e-05	1
HPCAL1	1.42674	0.0007519	1.75e-05	1
SLC35A2	1.54012	0.0007543	1.76e-05	1
SNAI3	1.55982	0.0007548	1.77e-05	1
UFSP1	1.55618	0.0007569	1.77e-05	1
OBFC1	1.50921	0.0007597	1.78e-05	1
C16orf59	1.53069	0.00076	1.78e-05	1
ZNF385C	1.52765	0.0007662	1.8e-05	1
F10	1.57134	0.0007713	1.82e-05	1
MAST1	1.52625	0.0007718	1.82e-05	1
PVRL1	1.52625	0.0007725	1.82e-05	1
CDKN2D	1.55666	0.0007771	1.84e-05	1
CEACAM1	1.53092	0.0007807	1.85e-05	1
PRSS3	1.50353	0.000784	1.86e-05	1
COL20A1	1.5569	0.000786	1.87e-05	1
CBFA2T2	1.54297	0.0007864	1.87e-05	1
TBL2	1.49768	0.0007868	1.88e-05	1
HLA-DOA	1.51676	0.000787	1.87e-05	1
MSL3	1.53046	0.0007872	1.88e-05	1
BAT3	1.52858	0.0007874	1.87e-05	1
CDA	1.49298	0.0007878	1.88e-05	1
FTHL2	1.53046	0.0007899	1.89e-05	1
LOC653803	1.52253	0.0007949	1.9e-05	1
KCNG2	1.58529	0.000796	1.91e-05	1
AFAP1	1.55063	0.000799	1.91e-05	1
OTOF	1.52068	0.0007995	1.92e-05	1
MMP2	1.54799	0.0008024	1.93e-05	1
SGPL1	1.5387	0.0008027	1.93e-05	1
NR4A1	1.55135	0.0008033	1.93e-05	1
SPAG6	1.49142	0.0008037	1.93e-05	1
TUG1	1.5528	0.0008038	1.94e-05	1
ZNF205	1.53327	0.0008038	1.94e-05	1
AADAT	1.52648	0.000804	1.94e-05	1
TMEM159	1.49477	0.0008044	1.94e-05	1
C20orf4	1.53846	0.0008046	1.94e-05	1
FAM71E1	1.53398	0.0008047	1.94e-05	1
ADA	1.46757	0.0008084	1.96e-05	1
RCE1	1.54369	0.0008133	1.97e-05	1
C5orf45	1.32345	0.0008161	1.98e-05	1
RNF126	1.54202	0.0008167	1.98e-05	1
YIPF7	1.52812	0.0008199	1.99e-05	1
BRMS1	1.54775	0.0008209	2e-05	1
MIR148B	1.56519	0.0008212	2e-05	1
C19orf30	1.53046	0.0008217	2e-05	1
SCRIB	1.52532	0.0008266	2.02e-05	1
RASGEF1C	1.5456	0.0008267	2.02e-05	1
NLRC3	1.55933	0.0008273	2.02e-05	1
LOC100131096	1.53116	0.0008274	2.02e-05	1
EVPL	1.52648	0.0008279	2.02e-05	1
PRCC	1.53022	0.0008297	2.03e-05	1
LYZL4	1.52114	0.0008316	2.04e-05	1
REEP6	1.53894	0.0008328	2.04e-05	1
NPDC1	1.48434	0.0008377	2.06e-05	1
SPINK9	1.49254	0.0008387	2.06e-05	1
GJB3	1.49098	0.0008412	2.07e-05	1
ZNF646	1.55521	0.0008417	2.07e-05	1
PCDHB17	1.55135	0.0008443	2.08e-05	1
GJD3	1.52161	0.0008458	2.09e-05	1
BAIAP2L1	1.54464	0.0008463	2.09e-05	1
ORAI1	1.54178	0.0008498	2.1e-05	1
ECGF1	1.50376	0.0008536	2.12e-05	1
PRMT7	1.5528	0.0008542	2.12e-05	1
KIAA1984	1.52253	0.0008546	2.12e-05	1
MMD2	1.54799	0.0008565	2.13e-05	1
LOC646617	1.53046	0.0008694	2.16e-05	1
EHMT1	1.55111	0.0008701	2.17e-05	1
CYB561D1	1.52253	0.0008727	2.18e-05	1
C22orf13	1.51469	0.0008732	2.18e-05	1
BMP4	1.54895	0.0008812	2.2e-05	1
TNFRSF25	1.5456	0.0008835	2.21e-05	1
KLK8	1.54679	0.0008847	2.22e-05	1
TOP2A	1.50466	0.0008854	2.22e-05	1
JUP	1.50038	0.0008855	2.22e-05	1
GRAP	1.55788	0.0008878	2.23e-05	1
MIR933	1.53046	0.00089	2.24e-05	1
TNFRSF18	1.53233	0.0008962	2.26e-05	1
GFRA4	1.55376	0.000897	2.26e-05	1
LOC729384	1.42878	0.0008981	2.26e-05	1
DACT1	1.55063	0.0008985	2.27e-05	1
GPATCH4	1.54107	0.0009003	2.27e-05	1
LRRC24	1.53116	0.0009006	2.28e-05	1
JMJD4	1.52625	0.0009007	2.28e-05	1
DUT	1.52648	0.0009008	2.28e-05	1
OR4P4	1.44404	0.0009008	2.28e-05	1
GAGE12G	1.45582	0.0009017	2.29e-05	1
SLC4A11	1.55255	0.0009021	2.29e-05	1
C17orf50	1.55207	0.0009056	2.3e-05	1
FLT3	1.52184	0.0009109	2.32e-05	1
OSCAR	1.5186	0.0009154	2.33e-05	1
OR56B1	1.50602	0.0009231	2.35e-05	1
OTP	1.57505	0.0009249	2.36e-05	1
GTF2IRD1	1.52882	0.0009252	2.36e-05	1
ISG20	1.4637	0.0009262	2.36e-05	1
SPACA5B	1.51035	0.0009281	2.37e-05	1
MCART2	1.54775	0.0009382	2.4e-05	1
NHSL2	1.55958	0.0009427	2.41e-05	1
SNRNP25	1.35648	0.0009451	2.42e-05	1
CNN2	1.50489	0.0009456	2.42e-05	1
TBC1D25	1.49098	0.0009502	2.44e-05	1
CD68	1.40588	0.0009532	2.45e-05	1
GLIS2	1.55328	0.0009635	2.48e-05	1
ST5	1.52648	0.0009667	2.49e-05	1
MSLN	1.4828	0.0009668	2.49e-05	1
HYI	1.52718	0.000967	2.49e-05	1
TEX11	1.50989	0.0009743	2.52e-05	1
EBP	1.51355	0.0009745	2.52e-05	1
SLC23A2	1.52045	0.0009748	2.52e-05	1
LILRB4	1.51745	0.000975	2.52e-05	1
MGAT3	1.52695	0.000983	2.54e-05	1
C5orf49	1.46778	0.0009842	2.55e-05	1
PLAA	1.51953	0.0009864	2.56e-05	1
JMJD6	1.52323	0.0009866	2.56e-05	1
PDGFRL	1.51584	0.0009892	2.57e-05	1
POLR2J	1.514	0.0009958	2.59e-05	1
ZNF473	1.5186	0.0009964	2.59e-05	1
FAM176B	1.50376	0.001001	2.61e-05	1
ONECUT2	1.53374	0.001002	2.61e-05	1
POLR2D	1.51745	0.001002	2.62e-05	1
CDKN2C	1.51999	0.001003	2.62e-05	1
ZDHHC12	1.54083	0.001004	2.62e-05	1
SETD4	1.51378	0.001005	2.62e-05	1
PRKX	1.53186	0.001008	2.64e-05	1
FGFR1	1.51035	0.001019	2.67e-05	1
LINCR	1.52602	0.001019	2.67e-05	1
LOC100129502	1.50399	0.00102	2.67e-05	1
LOC340260	1.50875	0.001031	2.71e-05	1
LOC92659	1.53046	0.001037	2.73e-05	1
GTF3C5	1.51584	0.001037	2.73e-05	1
TAC4	1.50489	0.001039	2.74e-05	1
PCDHGA4	1.53398	0.001041	2.75e-05	1
PRKD2	1.50489	0.001043	2.75e-05	1
TTC36	1.52929	0.001055	2.79e-05	1
RAB37	1.52462	0.001056	2.79e-05	1
ZNF43	1.51172	0.001056	2.79e-05	1
RPESP	1.52462	0.00106	2.81e-05	1
GINS2	1.49231	0.001068	2.83e-05	1
SDS	1.42268	0.00107	2.84e-05	1
ADCY4	1.50376	0.00107	2.84e-05	1
ANKRD6	1.48655	0.001071	2.85e-05	1
LOC731486	1.51745	0.001075	2.86e-05	1
HIST1H2BJ	1.51332	0.001076	2.87e-05	1
LOC143941	1.53398	0.001077	2.88e-05	1
DEFA1	1.28949	0.001078	2.88e-05	1
PXMP2	1.48832	0.00108	2.89e-05	1
FCGRT	1.51378	0.001086	2.9e-05	1
CLUL1	1.37552	0.001092	2.92e-05	1
LOC285908	1.52253	0.001093	2.93e-05	1
LPPR1	1.51607	0.001093	2.94e-05	1
SPG7	1.48412	0.001094	2.94e-05	1
LOC100132727	1.52905	0.001099	2.95e-05	1
PVR	1.51653	0.0011	2.96e-05	1
HSPC111	1.54226	0.001102	2.97e-05	1
IRF5	1.34807	0.001107	2.98e-05	1
STEAP3	1.46778	0.00111	2.99e-05	1
REC8	1.51378	0.001113	3e-05	1
ITPRIPL1	1.50784	0.001119	3.02e-05	1
HMGN2	1.50875	0.001121	3.03e-05	1
UOX	1.46886	0.001132	3.07e-05	1
LOC440595	1.47558	0.001132	3.06e-05	1
ZNF778	1.50534	0.001133	3.07e-05	1
CRHR2	1.50331	0.001133	3.07e-05	1
IFT140	1.51999	0.001143	3.1e-05	1
ZIM2	1.43143	0.001152	3.14e-05	1
CACNG8	1.52393	0.001159	3.16e-05	1
DNASE1L2	1.52975	0.001161	3.18e-05	1
SLC37A3	1.5186	0.001161	3.18e-05	1
SOLH	1.50489	0.001161	3.19e-05	1
TNFAIP8	1.51103	0.001162	3.18e-05	1
TRADD	1.51999	0.001162	3.18e-05	1
RFC3	1.35759	0.001162	3.18e-05	1
OSBPL5	1.53421	0.001162	3.17e-05	1
PRTG	1.52022	0.001169	3.21e-05	1
OR5P2	1.39005	0.00117	3.22e-05	1
SPINK5	1.49254	0.001175	3.23e-05	1
OR2A9P	1.46092	0.00118	3.25e-05	1
FABP6	1.51446	0.001191	3.28e-05	1
MIR338	1.52277	0.001192	3.29e-05	1
SUPV3L1	1.50966	0.001194	3.3e-05	1
LOC440570	1.44321	0.001199	3.31e-05	1
FAM65C	1.47254	0.001199	3.32e-05	1
DCAF15	1.5024	0.001201	3.33e-05	1
GCHFR	1.51722	0.001202	3.33e-05	1
LOC100134363	1.4941	0.001221	3.39e-05	1
SIM2	1.52602	0.001225	3.41e-05	1
TPM4	1.48192	0.001226	3.41e-05	1
ADRA2A	1.50784	0.001226	3.41e-05	1
C10orf84	1.49589	0.001228	3.42e-05	1
PARD6G	1.53445	0.001232	3.44e-05	1
GRID1	1.51561	0.001239	3.46e-05	1
TRIM14	1.50648	0.001243	3.47e-05	1
MIR221	1.49925	0.001244	3.48e-05	1
ZFHX3	1.48854	0.001244	3.48e-05	1
HIST1H1A	1.50966	0.00125	3.5e-05	1
C6orf162	1.42308	0.001257	3.53e-05	1
HNRNPA1	1.50421	0.001258	3.53e-05	1
HIPK4	1.49678	0.00126	3.54e-05	1
HORMAD2	1.48346	0.001263	3.55e-05	1
OR9K2	1.45033	0.001267	3.57e-05	1
HSPB2	1.49925	0.001267	3.56e-05	1
THSD1	1.52161	0.001267	3.57e-05	1
GALNT10	1.48987	0.001274	3.59e-05	1
CCL3L3	1.49477	0.001277	3.62e-05	1
BTF3	1.48898	0.001277	3.61e-05	1
ZNF750	1.51999	0.001278	3.61e-05	1
TLR10	1.48588	0.001278	3.62e-05	1
TNFRSF13C	1.46306	0.001278	3.61e-05	1
SNORA52	1.54369	0.001278	3.61e-05	1
DUSP5P	1.50716	0.001279	3.63e-05	1
IER3	1.4637	0.001282	3.65e-05	1
PRKCDBP	1.47645	0.001282	3.64e-05	1
CYB561	1.52882	0.001284	3.66e-05	1
LOC649159	1.54655	0.001285	3.66e-05	1
USE1	1.5024	0.001286	3.67e-05	1
MKKS	1.49993	0.001286	3.67e-05	1
LOC644949	1.48787	0.001287	3.67e-05	1
C2orf15	1.49343	0.001296	3.7e-05	1
MON1B	1.50466	0.001298	3.71e-05	1
FAM160B1	1.53445	0.001303	3.73e-05	1
MGST1	1.42613	0.001304	3.73e-05	1
MDK	1.4988	0.001304	3.74e-05	1
DUS3L	1.52858	0.001304	3.73e-05	1
BMP15	1.5163	0.00131	3.76e-05	1
SMTN	1.52393	0.00131	3.77e-05	1
GPR68	1.46778	0.00131	3.76e-05	1
RBP4	1.39997	0.001311	3.77e-05	1
RIBC1	1.49993	0.001312	3.77e-05	1
TEX13A	1.52999	0.001312	3.78e-05	1
SIVA1	1.49009	0.001325	3.82e-05	1
ZBTB32	1.56299	0.001329	3.83e-05	1
SLC7A4	1.50421	0.001329	3.84e-05	1
CLDN15	1.51653	0.001334	3.87e-05	1
C7orf28A	1.4828	0.001335	3.87e-05	1
GULP1	1.47016	0.001336	3.87e-05	1
ADCY5	1.50173	0.001341	3.89e-05	1
MCPH1	1.50761	0.001341	3.89e-05	1
C12orf8	1.49522	0.001345	3.91e-05	1
SIVA	1.50421	0.001346	3.91e-05	1
CDH7	1.51446	0.001355	3.94e-05	1
ARHGAP10	1.514	0.001355	3.94e-05	1
BTBD3	1.50399	0.001356	3.95e-05	1
C1orf102	1.4997	0.001357	3.95e-05	1
C9orf130	1.51745	0.00136	3.97e-05	1
MAGEA2	1.50716	0.001365	3.99e-05	1
AKR7A3	1.50331	0.001369	4e-05	1
GLI3	1.50173	0.001382	4.04e-05	1
C10orf67	1.51584	0.001383	4.05e-05	1
CEP164	1.49948	0.001396	4.09e-05	1
C4orf23	1.50989	0.001397	4.1e-05	1
ATAD3C	1.51309	0.001402	4.11e-05	1
C10orf47	1.51149	0.001404	4.13e-05	1
OR56A4	1.43021	0.001411	4.15e-05	1
CCR10	1.5024	0.001416	4.17e-05	1
CCDC37	1.48346	0.001417	4.18e-05	1
FGD5	1.50286	0.001418	4.18e-05	1
FES	1.523	0.001419	4.19e-05	1
ISG15	1.5058	0.00142	4.19e-05	1
HR	1.51814	0.001435	4.24e-05	1
CER1	1.52929	0.001435	4.24e-05	1
NOX1	1.4997	0.001436	4.25e-05	1
ZNF235	1.49187	0.001449	4.29e-05	1
TRAF2	1.51035	0.001451	4.31e-05	1
FAM21C	1.43225	0.001451	4.31e-05	1
MYH7	1.42674	0.001451	4.3e-05	1
LOC645431	1.50286	0.001451	4.31e-05	1
DAPL1	1.49925	0.001451	4.31e-05	1
INHBB	1.49365	0.001454	4.33e-05	1
CCDC101	1.49701	0.001456	4.34e-05	1
UBE2L6	1.49925	0.001456	4.33e-05	1
LOC100131786	1.4839	0.001456	4.34e-05	1
TNFRSF19	1.5083	0.001462	4.36e-05	1
FOLR1	1.47995	0.001463	4.37e-05	1
ABCF2	1.48987	0.001464	4.37e-05	1
PPP1R1A	1.4941	0.001465	4.38e-05	1
GRAMD2	1.45455	0.001483	4.44e-05	1
FUNDC2	1.46499	0.001484	4.45e-05	1
KCNQ4	1.48258	0.001486	4.46e-05	1
TRMT2B	1.48017	0.00149	4.47e-05	1
HS6ST3	1.48126	0.001491	4.48e-05	1
FLJ16734	1.52253	0.001497	4.52e-05	1
CYP2S1	1.50852	0.001498	4.51e-05	1
B3GNT7	1.53492	0.001498	4.51e-05	1
NSMCE2	1.4892	0.001498	4.51e-05	1
ANKRD30B	1.49031	0.001498	4.52e-05	1
NRM	1.50083	0.001504	4.54e-05	1
CYS1	1.50625	0.001504	4.55e-05	1
PCDHGB6	1.50399	0.001504	4.55e-05	1
CRABP1	1.43658	0.001515	4.59e-05	1
CDK3	1.52975	0.001515	4.59e-05	1
C1orf159	1.49701	0.001516	4.59e-05	1
RNH1	1.4476	0.001516	4.59e-05	1
ATG4D	1.52068	0.001518	4.61e-05	1
RPL29	1.48236	0.001519	4.62e-05	1
KIF21B	1.4881	0.001522	4.63e-05	1
ELAC2	1.49589	0.001534	4.67e-05	1
LOC440396	1.49187	0.001535	4.67e-05	1
PUS1	1.50399	0.00154	4.69e-05	1
NPHS2	1.43266	0.001546	4.72e-05	1
LOC100133607	1.48633	0.001546	4.72e-05	1
ABHD11	1.51057	0.001547	4.73e-05	1
ALS2CL	1.51515	0.001547	4.72e-05	1
ZSCAN10	1.50534	0.001559	4.77e-05	1
OR52I2	1.37665	0.001565	4.8e-05	1
FGF22	1.53539	0.001566	4.8e-05	1
FLJ46257	1.45433	0.001566	4.79e-05	1
TACR2	1.53186	0.001567	4.8e-05	1
WISP2	1.49723	0.001575	4.86e-05	1
POU3F3	1.47232	0.001576	4.84e-05	1
C9orf41	1.48522	0.001576	4.86e-05	1
MRPL11	1.48943	0.001576	4.85e-05	1
OTUD7A	1.51057	0.001577	4.84e-05	1
TMC4	1.53374	0.001577	4.85e-05	1
GALNTL4	1.49432	0.001577	4.84e-05	1
SNORA74B	1.4806	0.001577	4.85e-05	1
C3orf52	1.49611	0.001583	4.88e-05	1
FAM127C	1.48324	0.001584	4.89e-05	1
FBXW2	1.47406	0.001585	4.9e-05	1
SLC37A1	1.48104	0.001585	4.91e-05	1
LOC401233	1.43781	0.001585	4.91e-05	1
C1orf165	1.48456	0.001585	4.9e-05	1
ARD1B	1.42288	0.001586	4.9e-05	1
EXOSC4	1.4892	0.001586	4.92e-05	1
SCAMP4	1.49098	0.001587	4.92e-05	1
EME2	1.5108	0.001593	4.95e-05	1
SLA2	1.5124	0.001596	4.96e-05	1
POU3F4	1.48787	0.001597	4.96e-05	1
ATP6V0A4	1.50421	0.001601	4.98e-05	1
C17orf101	1.47973	0.001602	4.99e-05	1
CTDP1	1.48965	0.001602	5e-05	1
TRERF1	1.48633	0.001603	4.99e-05	1
SYN1	1.49343	0.001609	5.02e-05	1
DEPDC5	1.5024	0.001609	5.02e-05	1
ANKRD39	1.47689	0.00161	5.03e-05	1
MNDA	1.48544	0.001627	5.09e-05	1
MIST	1.49165	0.001629	5.1e-05	1
KCNJ14	1.49254	0.001632	5.12e-05	1
SH3BP5	1.47951	0.001632	5.11e-05	1
ZNF75D	1.17371	0.001632	5.11e-05	1
CD36	1.40944	0.001638	5.14e-05	1
ITGB1BP1	1.48126	0.001639	5.15e-05	1
CYP4Z1	1.468	0.001639	5.14e-05	1
RASSF6	1.4881	0.001648	5.18e-05	1
LOC100130604	1.47842	0.00165	5.19e-05	1
TMCO4	1.4341	0.001656	5.21e-05	1
GMPPB	1.49343	0.001657	5.22e-05	1
SOX18	1.45012	0.001664	5.25e-05	1
ZCCHC12	1.22745	0.001668	5.27e-05	1
ERAP1	1.42066	0.001668	5.27e-05	1
GAGE4	1.39179	0.001668	5.26e-05	1
ZNF764	1.47384	0.001669	5.28e-05	1
HYAL3	1.48876	0.001672	5.29e-05	1
DNAJC30	1.47232	0.001674	5.3e-05	1
GRB7	1.49254	0.001678	5.32e-05	1
HCN4	1.48743	0.00169	5.36e-05	1
PRO0628	1.47232	0.00169	5.37e-05	1
C6orf25	1.4341	0.001701	5.41e-05	1
OR13A1	1.48588	0.001715	5.46e-05	1
OR51E1	1.48765	0.001723	5.49e-05	1
CRYBB2	1.46113	0.001743	5.57e-05	1
CTSA	1.48082	0.001743	5.56e-05	1
PHF8	1.48236	0.001747	5.58e-05	1
CD151	1.47493	0.001751	5.6e-05	1
VWCE	1.47514	0.001755	5.61e-05	1
HOTAIR	1.50898	0.001755	5.62e-05	1
OTC	1.48965	0.001755	5.62e-05	1
ANXA13	1.50173	0.001781	5.71e-05	1
MGLL	1.50263	0.001787	5.74e-05	1
LOC643949	1.47645	0.001787	5.73e-05	1
LSM7	1.4979	0.001788	5.74e-05	1
FLJ45256	1.48787	0.001789	5.75e-05	1
GNL3	1.48544	0.001794	5.77e-05	1
OR8U1	1.43926	0.001794	5.78e-05	1
MLC1	1.49678	0.001802	5.81e-05	1
RHBDL2	1.45921	0.001809	5.84e-05	1
KCNK4	1.50286	0.00181	5.84e-05	1
LIMK1	1.4721	0.00181	5.84e-05	1
SERHL	1.46735	0.001821	5.88e-05	1
PAFAH2	1.4892	0.001823	5.89e-05	1
ZNF394	1.49544	0.001828	5.91e-05	1
BNIPL	1.48522	0.001829	5.92e-05	1
CORO1B	1.48412	0.001834	5.94e-05	1
TMEM200C	1.47885	0.001834	5.94e-05	1
TRPM3	1.46542	0.001836	5.96e-05	1
CRYGA	1.49522	0.001844	5.99e-05	1
SORCS1	1.46071	0.001845	5.99e-05	1
C9orf95	1.46135	0.001847	6e-05	1
PARVB	1.47689	0.001851	6.02e-05	1
ADAM33	1.4828	0.001852	6.03e-05	1
ANKRD44	1.4771	0.001853	6.03e-05	1
CHRNB1	1.47885	0.001864	6.08e-05	1
ZFHX2	1.44613	0.001875	6.13e-05	1
PKN1	1.48324	0.001875	6.13e-05	1
C15orf23	1.37722	0.001876	6.13e-05	1
OR4K15	1.40607	0.001882	6.17e-05	1
CCNB3	1.49298	0.001882	6.17e-05	1
RUNX1	1.52161	0.001884	6.18e-05	1
LOC387723	1.46757	0.001885	6.19e-05	1
CLIC3	1.49187	0.001888	6.2e-05	1
CHERP	1.4771	0.001893	6.23e-05	1
OSBPL7	1.47362	0.001893	6.23e-05	1
RHOD	1.50376	0.001894	6.22e-05	1
ATAD3B	1.49365	0.001898	6.25e-05	1
NHS	1.50512	0.0019	6.26e-05	1
LOC100190940	1.47037	0.001909	6.3e-05	1
POR	1.47776	0.001912	6.32e-05	1
ZNF414	1.48854	0.001919	6.35e-05	1
SDC1	1.49454	0.001919	6.34e-05	1
HLA-DRA	1.33851	0.001936	6.41e-05	1
FAM9B	1.46177	0.001946	6.45e-05	1
ALDH4A1	1.4708	0.001951	6.48e-05	1
MAGI3	1.47995	0.001951	6.48e-05	1
CARTPT	1.26486	0.001952	6.48e-05	1
DPY30	1.46714	0.001954	6.5e-05	1
LOC100131187	1.41603	0.001955	6.51e-05	1
ROBO1	1.49723	0.001957	6.52e-05	1
COG7	1.46692	0.001962	6.54e-05	1
LOC96597	1.47493	0.001963	6.55e-05	1
MAP3K7IP1	1.49858	0.001963	6.56e-05	1
TMEM119	1.47536	0.001963	6.55e-05	1
GPR114	1.49544	0.001963	6.54e-05	1
BRS3	1.5006	0.001966	6.58e-05	1
POFUT2	1.50308	0.001967	6.57e-05	1
CTAGE5	1.45497	0.001969	6.59e-05	1
NXPH4	1.52788	0.001971	6.6e-05	1
HSD17B14	1.49499	0.001992	6.68e-05	1
PTPRC	1.48456	0.001999	6.71e-05	1
APBB2	1.48346	0.001999	6.71e-05	1
AP1B1	1.46735	0.002002	6.73e-05	1
SPSB1	1.48324	0.002002	6.74e-05	1
MDN1	1.46951	0.002003	6.74e-05	1
PDGFD	1.4455	0.002003	6.73e-05	1
DERPC	1.47254	0.002003	6.74e-05	1
C3orf47	1.50286	0.002012	6.79e-05	1
TTC12	1.44844	0.002023	6.83e-05	1
LGI3	1.47124	0.002037	6.89e-05	1
CCDC48	1.4622	0.002038	6.9e-05	1
FAM179A	1.37005	0.002038	6.89e-05	1
FXN	1.46327	0.002059	6.98e-05	1
LOC123876	1.38179	0.002064	7e-05	1
TRIM16	1.49544	0.002066	7.01e-05	1
MLLT1	1.48832	0.002073	7.04e-05	1
NR1H2	1.47232	0.002079	7.07e-05	1
CASP9	1.49076	0.002081	7.09e-05	1
IFIT3	1.45688	0.002081	7.09e-05	1
MRI1	1.46327	0.002082	7.09e-05	1
SRA1	1.4637	0.002083	7.08e-05	1
LOC100128510	1.46649	0.002085	7.11e-05	1
LIPC	1.44488	0.002087	7.12e-05	1
ZNF599	1.47449	0.002087	7.12e-05	1
SDCBP2	1.42837	0.002121	7.24e-05	1
SDR9C7	1.48346	0.002129	7.28e-05	1
CHMP6	1.47885	0.00213	7.29e-05	1
RTN4RL1	1.47798	0.002147	7.36e-05	1
CDC42EP1	1.46563	0.002157	7.4e-05	1
RAD51L3	1.45794	0.002159	7.41e-05	1
LOC338799	1.42045	0.002162	7.43e-05	1
NSUN7	1.46757	0.002168	7.45e-05	1
CLEC4F	1.43885	0.00217	7.46e-05	1
FAM129B	1.45943	0.002179	7.5e-05	1
IGSF1	1.46284	0.002182	7.53e-05	1
NOG	1.46735	0.002182	7.52e-05	1
C1orf91	1.4782	0.002185	7.54e-05	1
ZNF320	1.47973	0.002186	7.55e-05	1
NAT5	1.46007	0.002188	7.56e-05	1
C2orf70	1.48368	0.002196	7.59e-05	1
CBX3	1.45159	0.002206	7.64e-05	1
LOC643923	1.4817	0.002207	7.64e-05	1
B3GNT4	1.46908	0.00221	7.66e-05	1
HARBI1	1.45666	0.002216	7.68e-05	1
RPS15A	1.47254	0.002219	7.7e-05	1
IP6K3	1.43266	0.002222	7.71e-05	1
MAK	1.45433	0.002223	7.73e-05	1
CD207	1.48368	0.002224	7.73e-05	1
GPR26	1.4039	0.002238	7.79e-05	1
BEST4	1.44928	0.002242	7.82e-05	1
LOC389332	1.4537	0.002242	7.81e-05	1
SFTPD	1.44238	0.002246	7.84e-05	1
CD37	1.50128	0.002247	7.85e-05	1
CALB2	1.47037	0.002248	7.85e-05	1
FOXP4	1.46049	0.002257	7.9e-05	1
TBC1D26	1.48126	0.002258	7.9e-05	1
DUSP26	1.38947	0.002261	7.92e-05	1
FLJ40852	1.46028	0.002262	7.93e-05	1
PIN1L	1.44928	0.002267	7.95e-05	1
MFSD4	1.46284	0.002282	8.02e-05	1
C3orf37	1.46908	0.002282	8.01e-05	1
LRRTM3	1.45943	0.002285	8.04e-05	1
RPS6KA6	1.43947	0.002286	8.04e-05	1
LCE6A	1.48214	0.002287	8.04e-05	1
HSD3B7	1.47907	0.002289	8.07e-05	1
ADAM3A	1.29149	0.002289	8.06e-05	1
RENBP	1.46092	0.002299	8.11e-05	1
DOC2A	1.42511	0.002303	8.13e-05	1
CRSP2	1.4497	0.002325	8.21e-05	1
CLIC5	1.43678	0.002338	8.27e-05	1
FCAR	1.46391	0.002344	8.29e-05	1
PRR22	1.45921	0.002369	8.39e-05	1
GABRQ	1.38735	0.002375	8.45e-05	1
FGF8	1.46864	0.002376	8.45e-05	1
MADCAM1	1.47232	0.002376	8.44e-05	1
RAET1E	1.4782	0.002377	8.47e-05	1
C6orf142	1.41004	0.002377	8.44e-05	1
FAM183B	1.4839	0.002378	8.43e-05	1
SPRR2E	1.35796	0.002378	8.48e-05	1
CENPO	1.46199	0.002378	8.46e-05	1
CD96	1.46391	0.002379	8.44e-05	1
TMEM201	1.47776	0.002379	8.49e-05	1
NOC4L	1.47514	0.002379	8.48e-05	1
UGT2B11	1.36874	0.002379	8.48e-05	1
HINFP	1.44781	0.002386	8.53e-05	1
IRGQ	1.46028	0.002398	8.58e-05	1
TAF6	1.47124	0.002399	8.58e-05	1
OGN	1.46156	0.002402	8.6e-05	1
OLFML2A	1.42308	0.002405	8.62e-05	1
PHEX	1.43802	0.002407	8.64e-05	1
RFNG	1.46306	0.002409	8.65e-05	1
GADD45G	1.45096	0.002409	8.63e-05	1
FNIP1	1.45159	0.002411	8.68e-05	1
TMEM161A	1.47645	0.002411	8.67e-05	1
LOC100128675	1.42106	0.002421	8.72e-05	1
NPFFR1	1.46113	0.002422	8.73e-05	1
PRLHR	1.45964	0.002422	8.74e-05	1
LOC388565	1.46692	0.002428	8.77e-05	1
SLC7A5P1	1.42146	0.002437	8.81e-05	1
HIST1H2BN	1.4341	0.002445	8.85e-05	1
LOC643509	1.44509	0.002455	8.89e-05	1
NFKB2	1.46542	0.002458	8.91e-05	1
EIF2B4	1.47145	0.002466	8.94e-05	1
FGF11	1.43926	0.002479	8.99e-05	1
HCRTR2	1.41303	0.002485	9.03e-05	1
RECQL4	1.47885	0.002485	9.03e-05	1
CCDC123	1.47297	0.002485	9.03e-05	1
ZNF815	1.46327	0.002486	9.02e-05	1
PRSS27	1.41084	0.002487	9.05e-05	1
CD163	1.15835	0.002487	9.05e-05	1
WBSCR16	1.45285	0.002495	9.09e-05	1
CLEC9A	1.39723	0.0025	9.11e-05	1
C11orf21	1.50489	0.002502	9.13e-05	1
LATS2	1.46606	0.002502	9.12e-05	1
ACCSL	1.47037	0.002503	9.14e-05	1
FLJ32011	1.42207	0.002518	9.2e-05	1
HOM-TES-103	1.45709	0.002521	9.21e-05	1
C4orf48	1.45794	0.002525	9.23e-05	1
STAB1	1.42288	0.00253	9.26e-05	1
SRMS	1.4758	0.002531	9.26e-05	1
DBN1	1.44865	0.002534	9.28e-05	1
DDX11	1.485	0.002535	9.3e-05	1
RAB43	1.45985	0.002537	9.3e-05	1
PANK4	1.4497	0.002537	9.31e-05	1
IRAK4	1.46007	0.002543	9.35e-05	1
LIF	1.45815	0.002544	9.37e-05	1
EIF4G1	1.45773	0.002544	9.34e-05	1
WDR5	1.44865	0.002544	9.36e-05	1
ARL9	1.41945	0.002544	9.35e-05	1
FIGN	1.46199	0.002544	9.36e-05	1
LOC100132037	1.43431	0.002545	9.38e-05	1
SERPINI2	1.35501	0.002559	9.44e-05	1
BAIAP2	1.44739	0.002577	9.51e-05	1
HAP1	1.43328	0.002582	9.53e-05	1
AHR	1.45921	0.002588	9.57e-05	1
TBCD	1.44467	0.002593	9.59e-05	1
LSP1	1.44509	0.002606	9.65e-05	1
SIRT2	1.46929	0.00261	9.67e-05	1
CTGLF6	1.44217	0.002612	9.69e-05	1
PTGR2	1.44802	0.002612	9.68e-05	1
RPS19BP1	1.4537	0.002625	9.76e-05	1
MYBPH	1.31839	0.002626	9.76e-05	1
KCTD14	1.4806	0.002626	9.76e-05	1
LOC648852	1.44238	0.002638	9.82e-05	1
OR2AE1	1.4573	0.002642	9.84e-05	1
OR2L2	1.47406	0.002649	9.87e-05	1
C16orf67	1.46456	0.002651	9.87e-05	1
DNAJC5	1.46714	0.002654	9.9e-05	1
OR10G8	1.38543	0.002658	9.92e-05	1
NCF1	1.44865	0.002662	9.94e-05	1
CCNDBP1	1.46092	0.002663	9.94e-05	1
GABRA3	1.47275	0.002665	9.97e-05	1
LOC441046	1.43719	0.002665	9.97e-05	1
MRPS12	1.44907	0.002665	9.96e-05	1
ANAPC2	1.45815	0.002674	0.0001002	1
PLAU	1.45391	0.002676	0.0001004	1
C9orf106	1.44404	0.002676	0.0001004	1
JUB	1.46092	0.002679	0.0001007	1
CSF1	1.49142	0.002679	0.0001006	1
LOC389791	1.48854	0.002686	0.000101	1
ABHD2	1.4637	0.002687	0.0001011	1
SETD8	1.46391	0.002692	0.0001014	1
DGKD	1.443	0.002694	0.0001017	1
LOC100134396	1.44342	0.002696	0.0001016	1
KBTBD12	1.45222	0.002697	0.0001016	1
CAD	1.44928	0.002697	0.0001016	1
C14orf178	1.50534	0.002701	0.000102	1
TK2	1.45773	0.002712	0.0001024	1
PGAM5	1.45709	0.002717	0.0001027	1
AMICA1	1.45921	0.002719	0.0001028	1
C19orf23	1.46135	0.002725	0.0001032	1
GALIG	1.42735	0.002725	0.0001031	1
SNRPB	1.46391	0.002728	0.0001033	1
CTSL1	1.45138	0.002733	0.0001037	1
MCM2	1.43472	0.002738	0.0001039	1
HSD17B3	1.44823	0.002739	0.000104	1
HPS5	1.45879	0.002752	0.0001046	1
LOC440027	1.44425	0.002753	0.0001047	1
PANX1	1.40548	0.002757	0.0001049	1
ZFP41	1.4771	0.002759	0.000105	1
MIR660	1.45497	0.002761	0.0001052	1
ENOX2	1.45794	0.002776	0.0001059	1
LOC389101	1.41824	0.002798	0.0001068	1
CTRB2	1.4771	0.002804	0.0001071	1
SNX20	1.47536	0.00281	0.0001074	1
LRRN4CL	1.4912	0.002828	0.0001084	1
TUBB6	1.46477	0.002829	0.0001082	1
SPANXE	1.48544	0.00283	0.0001083	1
CRMP1	1.44571	0.00283	0.0001082	1
MTHFD2	1.44321	0.002831	0.0001082	1
NLRP2	1.37608	0.002849	0.0001093	1
C1orf89	1.44823	0.002854	0.0001096	1
CLCN5	1.41103	0.002855	0.0001096	1
NUP93	1.42308	0.002866	0.0001101	1
IQCD	1.46929	0.002873	0.0001104	1
FBXO10	1.459	0.002881	0.0001108	1
GPR120	1.41163	0.002881	0.0001108	1
WNT7A	1.43328	0.002891	0.0001113	1
FTHL17	1.49165	0.002901	0.0001118	1
TOR1B	1.46735	0.002922	0.0001126	1
BSG	1.48456	0.002942	0.0001135	1
CLEC2B	1.43328	0.002944	0.0001137	1
FUT10	1.44051	0.002947	0.0001138	1
BRUNOL5	1.42106	0.002955	0.0001143	1
PBOV1	1.42674	0.002958	0.0001145	1
LRRC33	1.443	0.002958	0.0001145	1
IIP45	1.49365	0.002959	0.0001145	1
SNCA	1.29534	0.002961	0.0001147	1
C19orf61	1.44134	0.002963	0.0001149	1
CCDC107	1.44238	0.002968	0.0001151	1
LRRC29	1.44051	0.002986	0.0001159	1
MIR370	1.42878	0.002999	0.0001166	1
ZBTB16	1.4556	0.003016	0.0001173	1
VGLL2	1.49477	0.003024	0.0001177	1
GALR3	1.46156	0.003027	0.0001179	1
MUM1L1	1.32802	0.003029	0.000118	1
NCRNA00115	1.46994	0.003039	0.0001184	1
AGXT2L2	1.46242	0.003046	0.0001188	1
PRKCG	1.37589	0.003049	0.000119	1
NCRNA00086	1.43781	0.003055	0.0001193	1
ICAM3	1.45285	0.003057	0.0001195	1
GAS7	1.46628	0.003059	0.0001196	1
POLR1D	1.45307	0.00306	0.0001198	1
CGI-96	1.45879	0.003062	0.0001198	1
UHRF1	1.4339	0.003065	0.00012	1
LOC650368	1.47514	0.003065	0.0001201	1
LOC100130598	1.44488	0.003078	0.0001208	1
SOX17	1.4247	0.003091	0.0001214	1
PTPRR	1.42167	0.003092	0.0001214	1
UBE2E3	1.44676	0.003125	0.000123	1
NCALD	1.30685	0.003125	0.000123	1
CENPF	1.40706	0.003133	0.0001234	1
ZNF775	1.45815	0.003138	0.0001241	1
ANKRD11	1.44802	0.003139	0.000124	1
ANKLE2	1.44844	0.003139	0.0001243	1
UPP1	1.46972	0.00314	0.000124	1
HSD17B8	1.35833	0.00314	0.0001243	1
LOC100132391	1.4339	0.003142	0.000124	1
ALKBH3	1.45391	0.003142	0.000124	1
RGNEF	1.40076	0.003147	0.0001247	1
LOC643882	1.42837	0.003149	0.0001248	1
RNPS1	1.44196	0.00315	0.000125	1
CMTM1	1.42572	0.003152	0.000125	1
CYP2B6	1.49477	0.003154	0.0001252	1
HS3ST2	1.32328	0.003154	0.0001253	1
S100P	1.40924	0.003167	0.0001259	1
CTLA4	1.41965	0.003171	0.0001262	1
TMEM194B	1.42694	0.003172	0.0001261	1
C3orf32	1.44655	0.00319	0.000127	1
LOC391352	1.4341	0.003196	0.0001273	1
FOXD4L2	1.39509	0.003202	0.0001276	1
CSAD	1.46778	0.003205	0.0001278	1
SYN3	1.42146	0.003215	0.0001283	1
TRIM10	1.46199	0.003217	0.0001283	1
ANKFN1	1.41583	0.003219	0.0001286	1
RPTOR	1.46327	0.003221	0.0001287	1
C1QL2	1.42918	0.003231	0.0001292	1
ANKRD2	1.44259	0.003243	0.0001298	1
PRR20C	1.26791	0.003244	0.0001297	1
CSMD3	1.43761	0.003256	0.0001304	1
DAP	1.41183	0.003257	0.0001305	1
ZGPAT	1.45328	0.003265	0.000131	1
GCK	1.27632	0.003266	0.000131	1
DSCAM	1.44383	0.003267	0.0001309	1
MBD4	1.27714	0.003268	0.0001312	1
ARHGEF10L	1.43534	0.003269	0.0001313	1
ITGB5	1.43308	0.003286	0.000132	1
WFDC13	1.44238	0.00329	0.0001323	1
MIR1913	1.49589	0.003293	0.0001325	1
SNHG7	1.4403	0.003313	0.0001335	1
AURKC	1.44217	0.003325	0.0001342	1
C2orf62	1.39821	0.003336	0.0001347	1
FLRT1	1.45349	0.00334	0.000135	1
PLA2R1	1.4374	0.003343	0.0001352	1
WEE2	1.41263	0.00335	0.0001355	1
RASSF3	1.443	0.00337	0.0001364	1
KALRN	1.45307	0.003384	0.0001371	1
EFTUD1	1.4339	0.003395	0.0001378	1
ANPEP	1.48588	0.003396	0.0001378	1
RS1	1.39899	0.003396	0.0001377	1
C11orf83	1.41383	0.003397	0.0001377	1
C10orf32	1.42898	0.003405	0.0001383	1
TUT1	1.43988	0.003417	0.0001389	1
RRN3P2	1.40706	0.003421	0.0001391	1
IL1RL2	1.46692	0.003423	0.0001393	1
EBI3	1.37438	0.003452	0.0001407	1
FBXO7	1.43596	0.003453	0.0001406	1
VISA	1.4341	0.003455	0.0001408	1
RIN3	1.48566	0.003479	0.0001422	1
FLJ32784	1.44488	0.003482	0.0001421	1
SPC24	1.45012	0.003507	0.0001434	1
C6orf150	1.43451	0.003511	0.0001437	1
PCTK3	1.42248	0.003513	0.0001438	1
GSTT2B	1.34264	0.00352	0.0001442	1
TAF1C	1.43164	0.00353	0.0001448	1
TPM2	1.42146	0.003534	0.000145	1
MTUS2	1.40311	0.003536	0.0001452	1
LOC440558	1.44321	0.003536	0.0001452	1
SERGEF	1.39997	0.003548	0.0001459	1
TP53AP1	1.43102	0.003565	0.0001468	1
TCEB3CL	1.00695	0.003571	0.0001471	1
C2orf48	1.46199	0.003575	0.0001474	1
KRTAP5-8	1.47341	0.003587	0.000148	1
ZNF223	1.43637	0.003593	0.0001482	1
TTF2	1.42491	0.003595	0.0001484	1
BCYRN1	1.41643	0.003611	0.0001494	1
SIAH1	1.43823	0.003614	0.0001496	1
GLTPD1	1.4247	0.003622	0.00015	1
PXMP4	1.43719	0.003622	0.0001501	1
SIRT3	1.42857	0.003623	0.0001502	1
B3GALT4	1.42613	0.003626	0.0001504	1
EFNA5	1.44802	0.003628	0.0001506	1
NOL10	1.42531	0.00363	0.0001507	1
C21orf49	1.4476	0.00363	0.0001506	1
GMIP	1.42959	0.003634	0.000151	1
LOC647436	1.42572	0.00364	0.0001514	1
BAZ1A	1.43308	0.00364	0.0001513	1
FPGS	1.42714	0.003641	0.0001515	1
MCM5	1.42714	0.00365	0.000152	1
TH	1.45688	0.003651	0.0001522	1
FLJ45422	1.41223	0.003664	0.0001532	1
MAP1LC3C	1.46306	0.003664	0.0001528	1
HRIHFB2122	1.44238	0.003665	0.0001531	1
C12orf72	1.44238	0.003665	0.0001532	1
BYSL	1.42207	0.003666	0.0001532	1
UGT2A2	1.31978	0.003667	0.0001531	1
PSMB8	1.43637	0.003669	0.0001535	1
ZYG11A	1.43062	0.003675	0.000154	1
SCARF2	1.4476	0.003697	0.0001552	1
LOC643998	1.40607	0.003697	0.0001552	1
SPTB	1.43266	0.003704	0.0001556	1
LOC100130758	1.44134	0.003706	0.0001559	1
RAB8A	1.42592	0.003706	0.0001558	1
HTR1B	1.43554	0.00371	0.0001561	1
CLDN9	1.46972	0.003714	0.0001563	1
LOC648343	1.43021	0.00372	0.0001566	1
COX15	1.42714	0.003737	0.0001575	1
ZNF467	1.43864	0.003743	0.0001579	1
GCLM	1.40944	0.003746	0.0001581	1
HS1BP3	1.44886	0.003747	0.0001583	1
CHST10	1.43968	0.003749	0.0001583	1
PLK4	1.37268	0.003756	0.0001588	1
MAGEC1	1.41764	0.003757	0.0001588	1
JAKMIP3	1.40786	0.003759	0.0001591	1
MKNK1	1.44155	0.00376	0.0001591	1
ZNF284	1.26008	0.003779	0.0001602	1
LOC643842	1.41084	0.003798	0.0001611	1
FSCN3	1.42714	0.003802	0.0001613	1
dJ222E13.2	1.44383	0.003818	0.0001621	1
MRPL23	1.43205	0.003826	0.0001625	1
DNASE1	1.43554	0.003827	0.0001626	1
PCBD2	1.41583	0.003831	0.0001629	1
HGFAC	1.44404	0.003842	0.0001635	1
FSD1	1.41223	0.003851	0.0001641	1
VEGFC	1.44488	0.003855	0.0001643	1
DEAF1	1.42106	0.003872	0.0001653	1
CCDC146	1.43534	0.003889	0.0001664	1
RNF190	1.41403	0.003899	0.000167	1
ROBO4	1.43761	0.003903	0.0001673	1
TMEM225	1.40647	0.003903	0.0001672	1
AQP10	1.46628	0.003906	0.0001675	1
CDKN2A	1.42592	0.003916	0.000168	1
LOC284751	1.46306	0.003924	0.0001685	1
DDX12	1.44071	0.003924	0.0001686	1
DDI2	1.374	0.003924	0.0001684	1
CORO2A	1.42328	0.003926	0.0001688	1
FAM110A	1.45709	0.003928	0.0001689	1
UTF1	1.36184	0.003937	0.0001695	1
OTOL1	1.43062	0.003937	0.0001694	1
C3orf75	1.43451	0.003946	0.00017	1
GALNT4	1.42735	0.003947	0.0001701	1
FCF1	1.39801	0.003971	0.0001714	1
TMEM143	1.43554	0.003971	0.0001713	1
LOC284009	1.45391	0.003974	0.0001716	1
MICB	1.39899	0.003976	0.0001718	1
ASTN2	1.45455	0.003976	0.0001718	1
LOC646276	1.42552	0.00398	0.0001721	1
ZNF93	1.42511	0.003986	0.0001724	1
CD276	1.45815	0.004016	0.000174	1
ROPN1	1.37684	0.004016	0.0001739	1
ALPK1	1.42918	0.004026	0.0001746	1
UBL4B	1.42389	0.004026	0.0001748	1
BCOR	1.42005	0.004027	0.0001749	1
SLC16A11	1.4476	0.004029	0.0001746	1
DIDO1	1.41183	0.004042	0.0001759	1
THBS1	1.36407	0.004043	0.0001758	1
LOC729668	1.46135	0.004044	0.0001758	1
CYB5RL	1.43534	0.004046	0.0001758	1
C4orf17	1.41663	0.004047	0.0001761	1
CENPH	1.42592	0.00405	0.0001765	1
KCTD2	1.40056	0.004072	0.0001776	1
RIMBP3	1.47689	0.004106	0.0001793	1
ABCC11	1.42106	0.004107	0.0001793	1
HGD	1.39782	0.004113	0.0001797	1
C2orf78	1.44009	0.004144	0.0001812	1
DIP2A	1.45964	0.004145	0.0001814	1
VARS	1.43225	0.004145	0.0001813	1
LRRC3B	1.41323	0.004158	0.0001821	1
PRR11	1.41004	0.004165	0.0001826	1
CORO7	1.41643	0.004166	0.0001825	1
FAM48B2	1.47449	0.004166	0.0001827	1
FAM48A	1.40865	0.004167	0.000183	1
DMGDH	1.36668	0.004169	0.0001829	1
S100A13	1.44238	0.004171	0.0001832	1
DDX47	1.41263	0.004171	0.0001834	1
KRT71	1.39159	0.004172	0.0001833	1
AXIN1	1.45624	0.004185	0.0001841	1
IQCF2	1.46413	0.004197	0.0001849	1
MGC19604	1.44321	0.004199	0.0001849	1
C6orf124	1.43205	0.004199	0.0001848	1
GLI2	1.40489	0.004205	0.0001854	1
LOC728116	1.43472	0.004206	0.0001855	1
NFYA	1.41583	0.004214	0.000186	1
FLJ40113	1.41924	0.004217	0.0001862	1
CHCHD6	1.39665	0.004231	0.0001869	1
DNPEP	1.41784	0.004239	0.0001873	1
ZIK1	1.40174	0.004248	0.0001878	1
ACAP3	1.43246	0.004274	0.0001891	1
SYNJ1	1.39334	0.004275	0.0001892	1
NF2	1.42146	0.004286	0.0001898	1
TRMU	1.42187	0.004293	0.0001901	1
GAGE12J	1.29349	0.004296	0.0001905	1
CCNG2	1.43123	0.004296	0.0001904	1
TMEM191A	1.43062	0.004298	0.0001907	1
DRD4	1.3776	0.004324	0.0001919	1
MVD	1.42349	0.004334	0.0001924	1
LOC644250	1.43349	0.004339	0.0001927	1
HTR3B	1.42613	0.004362	0.0001939	1
ANGPT4	1.38198	0.004376	0.0001946	1
KIF23	1.41183	0.004385	0.0001951	1
SNORA41	1.42878	0.00439	0.0001954	1
MIIP	1.42714	0.004404	0.0001961	1
ZNF14	1.42146	0.004405	0.0001963	1
C20orf12	1.41985	0.004406	0.0001963	1
PDZD7	1.41543	0.004428	0.0001975	1
APBA3	1.42045	0.004433	0.0001978	1
ATP12A	1.41985	0.004435	0.0001978	1
MRPL28	1.43349	0.004436	0.0001981	1
BIRC7	1.3914	0.004446	0.0001986	1
LOC729646	1.38141	0.004452	0.000199	1
VRK3	1.42633	0.004453	0.0001991	1
A1CF	1.38562	0.004475	0.0002002	1
TPO	1.43205	0.004492	0.0002011	1
TMEM61	1.46306	0.004495	0.0002013	1
UNKL	1.43947	0.004497	0.0002015	1
SPINK2	1.41743	0.004499	0.0002017	1
SLCO5A1	1.41804	0.004499	0.0002018	1
NR4A3	1.42735	0.004502	0.000202	1
C20orf29	1.42045	0.004512	0.0002026	1
ITGB4	1.34391	0.004516	0.000203	1
LOC440925	1.42066	0.004517	0.0002029	1
OAZ2	1.39005	0.00452	0.0002032	1
KCNG1	1.43885	0.004533	0.0002039	1
FAM24A	1.44676	0.004533	0.000204	1
SLC13A3	1.41363	0.004536	0.0002042	1
MSH4	1.37608	0.004536	0.0002043	1
PHF17	1.41423	0.004557	0.0002054	1
LOC645262	1.41703	0.004564	0.0002058	1
PLA2G5	1.3947	0.004569	0.0002061	1
SCIN	1.26088	0.004571	0.0002064	1
LIN37	1.4243	0.004573	0.0002064	1
LOC554226	1.37155	0.004584	0.0002071	1
DNHD1	1.39704	0.004597	0.0002078	1
TTC7B	1.41423	0.004598	0.000208	1
C22orf29	1.41703	0.004599	0.0002082	1
GPC6	1.42187	0.0046	0.0002082	1
C21orf54	1.38026	0.00461	0.0002088	1
HNRNPAB	1.42796	0.004617	0.0002092	1
LOC644404	1.40687	0.004626	0.0002097	1
SLC29A4	1.41163	0.004632	0.0002101	1
TPRXL	1.44991	0.004633	0.0002104	1
FGF20	1.41884	0.004642	0.0002108	1
LRRC20	1.42491	0.004643	0.000211	1
CNIH3	1.31423	0.004654	0.0002117	1
S100A4	1.26119	0.004654	0.0002118	1
ADAM21P	1.35593	0.004655	0.0002116	1
C3orf18	1.42025	0.004655	0.0002119	1
GPR17	1.34626	0.004672	0.0002129	1
NLRP6	1.43616	0.004692	0.000214	1
C8G	1.47601	0.004693	0.0002147	1
C18orf22	1.42653	0.004693	0.0002148	1
EPB41L4B	1.38007	0.004695	0.0002147	1
SLIT1	1.39841	0.004695	0.000215	1
HCG27	1.41443	0.004696	0.0002144	1
ALDOB	1.39412	0.004697	0.0002152	1
CXCR7	1.38447	0.004697	0.0002145	1
ARR3	1.42755	0.004698	0.0002147	1
TMEM90B	1.42349	0.004704	0.0002156	1
SMPD2	1.41283	0.004712	0.0002161	1
FBP1	1.41904	0.004727	0.0002169	1
KIF24	1.37741	0.004736	0.0002174	1
SH3TC1	1.39567	0.004738	0.0002176	1
SLBP	1.40786	0.004766	0.000219	1
LILRA6	1.29534	0.004777	0.0002197	1
SGPP2	1.43225	0.004777	0.0002197	1
NKIRAS2	1.41743	0.004789	0.0002204	1
OR52I1	1.34989	0.004803	0.0002212	1
FLJ12684	1.40746	0.004806	0.0002216	1
UNC93B1	1.41804	0.004817	0.0002222	1
UCK2	1.41643	0.004824	0.0002226	1
FCN2	1.44802	0.004828	0.0002229	1
LOC340527	1.41044	0.004847	0.000224	1
GDPD3	1.42248	0.004868	0.0002251	1
KIAA0406	1.40667	0.004875	0.0002256	1
PIP5K2B	1.3887	0.004889	0.0002263	1
PGD	1.39938	0.004891	0.0002265	1
EFNA3	1.44113	0.004891	0.0002266	1
GRK6	1.41764	0.00492	0.0002286	1
RNASE6	1.40667	0.004921	0.0002283	1
MIR631	1.42674	0.004922	0.0002286	1
SCGB1C1	1.36426	0.004923	0.0002283	1
RNASE8	1.43534	0.004926	0.0002291	1
C4orf28	1.40667	0.004951	0.0002304	1
C4orf3	1.40885	0.004952	0.0002306	1
C1orf117	1.43843	0.004957	0.0002309	1
LOC441956	1.3231	0.004958	0.0002313	1
CSF2RA	1.41804	0.004959	0.0002311	1
LOC400558	1.42653	0.004961	0.0002316	1
SPRR2B	1.3412	0.004967	0.000232	1
ZNF300	1.39295	0.004969	0.0002325	1
DPEP3	1.40885	0.00497	0.0002324	1
BCL2L12	1.43761	0.00497	0.0002323	1
PILRA	1.43349	0.004971	0.0002323	1
ESPL1	1.3947	0.004992	0.0002337	1
FKBP1A	1.41784	0.005003	0.0002344	1
IDE	1.42796	0.005004	0.0002345	1
AZI1	1.43575	0.005004	0.0002344	1
ARMC6	1.41543	0.00501	0.0002349	1
HIST2H4A	1.39645	0.005029	0.0002359	1
SNORA63	1.42045	0.005033	0.0002362	1
COMT	1.39919	0.005054	0.0002376	1
SLC16A13	1.44342	0.005054	0.0002374	1
C3orf54	1.41864	0.005055	0.0002376	1
GLRA2	1.35962	0.005062	0.0002382	1
CNTFR	1.40786	0.005077	0.0002394	1
C6orf27	1.40351	0.005078	0.0002393	1
ATP6V1B1	1.42248	0.005108	0.0002411	1
NDUFB6	1.42755	0.005116	0.0002416	1
CST7	1.42776	0.005141	0.000243	1
PPEF1	1.36855	0.005144	0.0002433	1
PSCD4	1.32908	0.00515	0.0002436	1
PNMT	1.35227	0.005159	0.0002442	1
DYTN	1.28717	0.005172	0.000245	1
ZCCHC5	1.42268	0.005173	0.0002454	1
KRT16	1.33422	0.005173	0.000245	1
IFFO1	1.43082	0.005173	0.0002453	1
GGNBP2	1.3403	0.005175	0.0002453	1
THBD	1.39315	0.005182	0.0002459	1
OPA3	1.42491	0.005193	0.0002466	1
C19orf18	1.37533	0.005194	0.0002467	1
GAGE12E	1.38908	0.00522	0.0002481	1
LOC150185	1.34953	0.005232	0.0002489	1
ICOSLG	1.39899	0.005233	0.000249	1
THSD3	1.4403	0.005239	0.0002495	1
CSTF1	1.40568	0.005241	0.0002495	1
NUP214	1.41024	0.005246	0.0002499	1
YRDC	1.40076	0.00525	0.0002503	1
TSPYL3	1.42005	0.005258	0.0002507	1
C5AR1	1.39704	0.005263	0.0002511	1
STK32A	1.42086	0.005265	0.0002513	1
TMEM18	1.40509	0.005265	0.0002514	1
ITPA	1.3637	0.005299	0.0002531	1
DMKN	1.42308	0.005308	0.0002537	1
RASL11A	1.40528	0.005312	0.000254	1
SBK2	1.37855	0.005314	0.0002542	1
PDLIM2	1.38639	0.005315	0.0002545	1
LAD1	1.37306	0.005317	0.0002546	1
SPATA13	1.37798	0.00533	0.0002554	1
ADAR	1.41703	0.005346	0.0002563	1
MACROD2	1.3816	0.005376	0.0002578	1
RALY	1.41804	0.005384	0.0002585	1
FAM118B	1.41283	0.005393	0.0002591	1
NFRKB	1.41103	0.005407	0.0002599	1
TBC1D2B	1.41403	0.005417	0.0002605	1
FLJ41562	1.38985	0.005439	0.0002618	1
HHIPL1	1.43554	0.005439	0.0002616	1
LGALS9	1.39198	0.005466	0.0002633	1
ST3GAL1	1.41343	0.005471	0.0002636	1
IMPDH1	1.40786	0.005475	0.000264	1
HIC1	1.36668	0.005475	0.0002639	1
RASAL2	1.41163	0.005487	0.0002649	1
MBTPS1	1.40786	0.005488	0.0002648	1
C4orf49	1.40825	0.005494	0.0002653	1
DNAH9	1.37969	0.005509	0.0002665	1
GAMT	1.40449	0.005509	0.0002661	1
DAGLA	1.40449	0.005509	0.0002663	1
WNK2	1.40469	0.00551	0.0002664	1
IL17F	1.38313	0.005511	0.0002667	1
SAPS2	1.15996	0.005519	0.0002672	1
ADAMTS16	1.41263	0.005522	0.0002674	1
PPP2R3B	1.4039	0.00553	0.0002681	1
GALE	1.46671	0.005541	0.0002688	1
NADSYN1	1.4039	0.005543	0.0002688	1
LOC723972	1.40805	0.005572	0.0002704	1
TEX14	1.40786	0.005584	0.0002713	1
ZNF48	1.41363	0.005588	0.0002718	1
FAM123A	1.41363	0.005591	0.0002717	1
GOLM1	1.41543	0.005603	0.0002728	1
PINX1	1.40825	0.005618	0.0002736	1
PTGER1	1.42308	0.005621	0.0002739	1
STK24	1.40627	0.005635	0.0002747	1
MECR	1.39295	0.005641	0.0002752	1
MGC33407	1.42328	0.005641	0.0002751	1
FLJ42953	1.33618	0.00566	0.0002764	1
OR52K1	1.40548	0.00567	0.000277	1
TMPRSS5	1.3837	0.005679	0.0002776	1
LOC100131905	1.41343	0.00568	0.0002776	1
SNX32	1.39723	0.005683	0.0002779	1
SPEF1	1.40726	0.005683	0.0002781	1
MED27	1.41363	0.005694	0.000279	1
LOC401010	1.39723	0.005695	0.0002792	1
FLJ22639	1.41603	0.005696	0.0002788	1
MRPL27	1.41543	0.005713	0.0002802	1
NPR3	1.3885	0.005743	0.0002818	1
LOC154761	1.40469	0.005745	0.0002821	1
MS4A12	1.34012	0.005757	0.0002828	1
TTLL4	1.39801	0.005768	0.0002836	1
SLC4A5	1.41084	0.00577	0.0002835	1
PLEC1	1.41965	0.005779	0.0002842	1
ACE	1.43451	0.005806	0.0002858	1
NEK10	1.39528	0.005816	0.0002867	1
SLAMF8	1.35007	0.005818	0.000287	1
FGF12	1.40667	0.005819	0.0002867	1
LOC641942	1.38889	0.005819	0.0002872	1
LRSAM1	1.44488	0.00582	0.0002866	1
ABLIM1	1.41423	0.00582	0.000287	1
MC5R	1.41463	0.005904	0.0002915	1
HNRNPCL1	1.40647	0.00591	0.0002921	1
LDOC1	1.3885	0.005911	0.0002921	1
SLC10A4	1.3837	0.005948	0.0002944	1
OR5B3	1.2276	0.005949	0.0002948	1
TMEM131	1.40311	0.005951	0.0002948	1
NUDT18	1.38927	0.005978	0.0002965	1
RGAG4	1.39782	0.005981	0.0002968	1
PRDM14	1.42755	0.00599	0.0002976	1
SLC10A2	1.32926	0.005995	0.0002983	1
ATP2C2	1.40174	0.005995	0.0002982	1
OR2B2	1.38217	0.005997	0.0002982	1
OR8U8	1.28123	0.006006	0.0002991	1
GUCY1B2	1.42086	0.00601	0.0002996	1
EXD3	1.41503	0.006019	0.0003002	1
DGCR6	1.40766	0.006022	0.0003004	1
CD93	1.24254	0.006039	0.0003014	1
MAPK15	1.37589	0.006051	0.0003021	1
CBX4	1.38102	0.006069	0.0003035	1
C5orf20	1.44886	0.006071	0.0003034	1
FLJ44955	1.39841	0.006071	0.0003039	1
SLC30A2	1.39101	0.006071	0.0003033	1
LOC729402	1.30753	0.006078	0.0003046	1
ANXA8L2	1.38504	0.006079	0.0003046	1
C19orf60	1.39821	0.00608	0.0003051	1
SH2D3C	1.3837	0.006081	0.000305	1
ZC3HAV1L	1.40627	0.006082	0.0003049	1
NET1	1.38581	0.006119	0.0003074	1
TNIP3	1.36036	0.006119	0.0003073	1
EIF4EBP1	1.39684	0.006126	0.0003079	1
POLR2L	1.40667	0.006147	0.0003091	1
CABP2	1.40944	0.006152	0.0003095	1
KCMF1	1.40174	0.006171	0.0003106	1
PCOLCE2	1.34898	0.006175	0.0003109	1
[truncated: 5,795 more rows]

## Sheet: GSSE17048
Gene	FC	q.Value	p.Value	Direction
HLA-DRB5	5.48847	1.63e-27	4.32e-32	1
HLA-DRB1	4.0833	1.95e-26	1.03e-30	1
LOC651436	1.78571	4.86e-13	3.85e-17	1
LOC654194	1.58128	5.09e-13	5.39e-17	1
RPL31	1.77715	8.09e-13	1.5e-16	1
RPL21	1.68776	8.15e-13	1.08e-16	1
RPS3A	1.69492	9.21e-13	1.95e-16	1
LOC653773	1.76616	9.39e-13	1.49e-16	1
RPL26	1.75963	9.96e-13	2.37e-16	1
RPL9	1.69895	1.2e-12	3.17e-16	1
RPL17	1.7328	1.98e-12	6.29e-16	1
LOC642250	1.70882	2.11e-12	6.13e-16	1
RPL39	1.63506	4.9e-12	1.69e-15	1
HINT1	1.63026	1.49e-11	5.53e-15	1
RPS17	1.60488	1.91e-11	8.57e-15	1
LOC650276	1.62893	1.91e-11	8.07e-15	1
COMMD6	1.69434	1.98e-11	7.84e-15	1
LOC648622	1.5321	4.14e-11	1.97e-14	1
RPL23	1.59693	4.74e-11	2.38e-14	1
COX7C	1.57085	7.02e-11	3.72e-14	1
RPS24	1.58629	8.46e-11	4.7e-14	1
LOC731640	1.51999	9.55e-11	5.56e-14	1
LOC402057	1.53586	1.12e-10	6.79e-14	1
SNORD13	1.57134	1.3e-10	8.23e-14	1
S100P	1.55545	1.93e-10	1.28e-13	1
LOC388532	1.53445	2.19e-10	1.51e-13	1
C15ORF15	1.54512	3.18e-10	2.27e-13	1
LOC648000	1.55569	3.94e-10	2.91e-13	1
TOMM7	1.52068	4.02e-10	3.08e-13	1
RPS15A	1.46049	4.71e-10	3.74e-13	1
NDUFA4	1.45603	8.85e-10	7.26e-13	1
LOC391656	1.41924	9.39e-10	7.95e-13	1
PFDN5	1.54154	9.67e-10	8.44e-13	1
LOC388621	1.46735	1.13e-09	1.01e-12	1
C13ORF27	1.46391	1.4e-09	1.3e-12	1
RPL27	1.47514	1.49e-09	1.42e-12	1
SNRPG	1.52323	1.68e-09	1.65e-12	1
UQCRQ	1.45709	2.86e-09	2.87e-12	1
LY96	1.43554	2.93e-09	3.02e-12	1
LOC646766	1.48434	4.36e-09	4.61e-12	1
SNRPD2	1.48214	4.39e-09	4.88e-12	1
LOC651202	1.4839	4.47e-09	4.85e-12	1
RPL41	1.4039	6e-09	6.83e-12	1
LOC440737	1.43184	8.86e-09	1.03e-11	1
ARL17P1	1.41523	1.07e-08	1.27e-11	1
S100A12	1.39743	1.35e-08	1.68e-11	1
LOC441246	1.43947	1.37e-08	1.74e-11	1
RPL7	1.48743	1.37e-08	1.67e-11	1
LOC647361	1.40706	1.91e-08	2.48e-11	1
RPS10	1.42552	1.95e-08	2.58e-11	1
EEF1B2	1.47623	2.19e-08	2.95e-11	1
ANXA1	1.46649	2.41e-08	3.32e-11	1
IGJ	1.36631	2.46e-08	3.45e-11	1
COX7B	1.43123	3.1e-08	4.52e-11	1
LOC643284	1.38236	3.14e-08	4.49e-11	1
RPS27L	1.4556	3.92e-08	5.8e-11	1
KLRB1	1.37912	4.02e-08	6.06e-11	1
FCER1A	1.46456	4.38e-08	6.72e-11	1
RPL35	1.40588	4.65e-08	7.26e-11	1
XIST	1.28008	5.05e-08	8.02e-11	1
COX7A2	1.35208	5.38e-08	8.68e-11	1
RPS27	1.35446	5.57e-08	9.14e-11	1
LOC650518	1.40095	6.18e-08	1.03e-10	1
RPS18	1.38389	6.27e-08	1.06e-10	1
CD52	1.3344	6.61e-08	1.14e-10	1
LOC642989	1.37137	7.69e-08	1.34e-10	1
PSMA6	1.40095	8.92e-08	1.58e-10	1
CLC	1.30941	1.07e-07	1.93e-10	1
LOC441377	1.15794	1.14e-07	2.14e-10	1
ORM1	1.34012	1.15e-07	2.1e-10	1
RPS26L1	1.25141	1.15e-07	2.13e-10	1
CCDC72	1.44175	1.28e-07	2.43e-10	1
LOC650646	1.23548	1.62e-07	3.13e-10	1
RPS26	1.23047	2.1e-07	4.11e-10	1
RPS26L	1.23426	2.14e-07	4.31e-10	1
LSM3	1.43885	2.16e-07	4.28e-10	1
GZMA	1.33191	2.41e-07	4.92e-10	1
C17ORF61	1.33245	2.57e-07	5.36e-10	1
LOC389787	1.26711	2.59e-07	5.35e-10	1
LOC644934	1.21448	3.99e-07	8.44e-10	1
NDUFA1	1.32328	4.2e-07	8.99e-10	1
LOC442454	1.37476	4.4e-07	9.54e-10	1
LOC641848	1.38332	5.83e-07	1.28e-09	1
RBX1	1.30344	9.91e-07	2.2e-09	1
TMCO1	1.33654	1.08e-06	2.48e-09	1
LOC728973	1.31631	1.09e-06	2.48e-09	1
ATP5O	1.365	1.1e-06	2.48e-09	1
NDUFB3	1.35612	1.22e-06	2.87e-09	1
LOC731365	1.33833	1.23e-06	2.87e-09	1
LOC647340	1.30822	1.36e-06	3.25e-09	1
RPL30	1.2945	1.65e-06	3.98e-09	1
NDUFB2	1.31648	1.81e-06	4.41e-09	1
RNASE2	1.22264	1.87e-06	4.61e-09	1
NDUFS4	1.35263	2.01e-06	5e-09	1
LOC653658	1.21389	2.26e-06	5.68e-09	1
RNASE3	1.24782	2.36e-06	6e-09	1
C14ORF156	1.36351	2.43e-06	6.23e-09	1
CD3D	1.34264	2.57e-06	6.67e-09	1
DBI	1.32961	2.69e-06	7.05e-09	1
P2RY5	1.35281	2.91e-06	7.71e-09	1
ERH	1.32135	3.94e-06	1.05e-08	1
HBE1	1.02501	4.77e-06	1.29e-08	1
CIP29	1.37137	4.77e-06	1.3e-08	1
EVI2A	1.26008	5.31e-06	1.46e-08	1
S100A8	1.3089	8.33e-06	2.31e-08	1
LOC285900	1.32714	8.58e-06	2.4e-08	1
LOC100008589	1.21818	8.82e-06	2.5e-08	1
RWDD1	1.31544	9.43e-06	2.69e-08	1
LOC646483	1.29634	1.02e-05	2.94e-08	1
TXNDC17	1.28502	1.13e-05	3.28e-08	1
RPL24	1.29618	1.13e-05	3.33e-08	1
ATP5I	1.30293	1.21e-05	3.59e-08	1
SUB1	1.27894	1.27e-05	3.81e-08	1
LOC440567	1.26775	1.35e-05	4.07e-08	1
RPS20	1.26326	1.4e-05	4.26e-08	1
ACTR6	1.32696	1.56e-05	4.8e-08	1
LOC729008	1.30124	1.58e-05	4.89e-08	1
HS.524705	1.17288	1.68e-05	5.24e-08	1
KLRF1	1.27861	1.71e-05	5.37e-08	1
NDUFS5	1.27421	1.72e-05	5.46e-08	1
LOC646200	1.27894	1.8e-05	5.77e-08	1
ERAF	1.09854	1.9e-05	6.12e-08	1
RPL35A	1.29668	1.9e-05	6.19e-08	1
LOC651064	1.31096	1.98e-05	6.56e-08	1
ATP5J	1.30993	1.99e-05	6.51e-08	1
MYL6	1.23701	2.18e-05	7.26e-08	1
LOC644511	1.26984	2.3e-05	7.73e-08	1
UQCRH	1.27779	2.34e-05	7.97e-08	1
MRPL13	1.30634	2.35e-05	7.96e-08	1
HSP90AA1	1.28074	2.68e-05	9.21e-08	1
DEFA4	1.09625	2.83e-05	9.82e-08	1
PPP3R1	1.26952	2.97e-05	1.04e-07	1
LOC647673	1.19732	3.21e-05	1.14e-07	1
TXN	1.22549	3.23e-05	1.14e-07	1
GZMK	1.1936	3.32e-05	1.19e-07	1
PPBP	1.13688	3.38e-05	1.22e-07	1
MRPS18C	1.27243	3.43e-05	1.25e-07	1
RPS29	1.24533	3.49e-05	1.28e-07	1
AKR1C3	1.24875	3.61e-05	1.33e-07	1
KIR3DL2	1.05552	3.63e-05	1.34e-07	1
HDC	1.14534	3.86e-05	1.45e-07	1
FAU	1.28238	4.02e-05	1.53e-07	1
MARCO	1.26358	4.02e-05	1.52e-07	1
HS.573503	1.10266	4.72e-05	1.82e-07	1
RPL4	1.28222	4.73e-05	1.81e-07	1
ATP5C1	1.23564	4.76e-05	1.85e-07	1
ENY2	1.25502	5.17e-05	2.03e-07	1
LSM1	1.25581	5.48e-05	2.16e-07	1
C17ORF45	1.25439	6.54e-05	2.61e-07	1
IFI44L	1.08401	6.88e-05	2.77e-07	1
IFI44	1.17744	8.15e-05	3.3e-07	1
GLRX	1.20919	8.52e-05	3.49e-07	1
TXNDC1	1.24425	8.57e-05	3.49e-07	1
PAX7	1.23457	8.61e-05	3.55e-07	1
ATP6V1G1	1.23716	8.73e-05	3.63e-07	1
FCGR1A	1.2273	9e-05	3.76e-07	1
PSMA4	1.26968	9.46e-05	3.98e-07	1
EIF3E	1.24054	0.0001009	4.27e-07	1
C14ORF112	1.26438	0.0001057	4.5e-07	1
ABCA1	1.17883	0.0001095	4.69e-07	1
LOC650298	1.16428	0.0001156	4.98e-07	1
COMMD3	1.26598	0.0001175	5.13e-07	1
LOC644863	1.25786	0.0001285	5.64e-07	1
SRP14	1.25518	0.0001434	6.37e-07	1
NFXL1	1.17827	0.0001438	6.35e-07	1
CAPZA2	1.19446	0.000147	6.57e-07	1
LSM5	1.27113	0.0001496	6.77e-07	1
GZMH	1.02533	0.0001498	6.74e-07	1
RPS21	1.2335	0.0001607	7.31e-07	1
HIST1H4C	1.23747	0.0001629	7.46e-07	1
PPA1	1.26566	0.000168	7.73e-07	1
FKBP5	1.22564	0.0001743	8.07e-07	1
PRDX4	1.16618	0.0001926	8.97e-07	1
C8ORF59	1.25141	0.0002065	9.72e-07	1
C12ORF57	1.22489	0.0002255	1.07e-06	1
LOC401206	1.21996	0.0002293	1.1e-06	1
RPS6	1.25802	0.0002297	1.09e-06	1
LOC729466	1.25676	0.0002351	1.14e-06	1
ATP5L	1.23533	0.0002418	1.18e-06	1
LOC652493	1.11321	0.0002527	1.24e-06	1
MRPL51	1.20584	0.0002594	1.31e-06	1
LOC649923	1.12918	0.00026	1.28e-06	1
KIR3DL1	1.12095	0.0002607	1.31e-06	1
EEF1G	1.22941	0.0002611	1.3e-06	1
CHMP5	1.22609	0.0002612	1.31e-06	1
LOC642113	1.08331	0.000262	1.3e-06	1
SS18L2	1.24409	0.0002623	1.33e-06	1
TPST1	1.1868	0.0002652	1.35e-06	1
LSM7	1.24564	0.0002748	1.41e-06	1
TINP1	1.25534	0.0002835	1.46e-06	1
CTSG	1.10865	0.0002857	1.49e-06	1
SNHG5	1.23701	0.0002866	1.49e-06	1
C20ORF52	1.24906	0.0002911	1.53e-06	1
RPS14	1.21286	0.0003054	1.61e-06	1
SHFM1	1.22534	0.0003096	1.65e-06	1
RPL11	1.23442	0.000327	1.76e-06	1
LOC401233	1.17841	0.0003336	1.8e-06	1
RPS25	1.19389	0.0003397	1.84e-06	1
PSMC2	1.25865	0.0003575	1.95e-06	1
RPL6	1.22971	0.0003608	1.98e-06	1
GTF2H5	1.23885	0.0003748	2.06e-06	1
DPY30	1.23579	0.0004034	2.24e-06	1
PRICKLE4	1.23381	0.0004044	2.24e-06	1
MRPL22	1.23442	0.0004073	2.27e-06	1
HS.579530	1.25047	0.000408	2.3e-06	1
LOC650557	1.21403	0.0004081	2.29e-06	1
GIMAP7	1.23839	0.0004453	2.53e-06	1
RPL36AL	1.20048	0.0004639	2.65e-06	1
IFIT1	1.04428	0.0004737	2.72e-06	1
BLOC1S1	1.15141	0.000478	2.76e-06	1
COX17	1.22474	0.0004805	2.8e-06	1
LOC388344	1.11819	0.0004809	2.79e-06	1
PSMB1	1.23168	0.0004824	2.82e-06	1
LOC647450	1.07458	0.0004921	2.9e-06	1
MRPS23	1.23472	0.0004925	2.92e-06	1
TMEM126A	1.24039	0.0004931	2.9e-06	1
MRPS22	1.22714	0.0005174	3.08e-06	1
C14ORF2	1.16523	0.0005176	3.09e-06	1
LOC158345	1.19417	0.0005294	3.19e-06	1
METAP2	1.24906	0.0005298	3.21e-06	1
TAX1BP1	1.20351	0.0005666	3.46e-06	1
MRPL3	1.21936	0.0005709	3.5e-06	1
MS4A3	1.23274	0.0005735	3.54e-06	1
GMFG	1.21021	0.0005739	3.55e-06	1
LOC644297	1.20715	0.0005812	3.61e-06	1
KIR2DS5	1.12108	0.0005866	3.66e-06	1
HERC5	1.08003	0.0005883	3.69e-06	1
DPM1	1.23305	0.0006328	3.98e-06	1
GNG11	1.14653	0.0006394	4.04e-06	1
CAMK1G	1.02828	0.0007425	4.75e-06	1
ELA2	1.06781	0.0007432	4.74e-06	1
LOC441775	1.13443	0.0007721	4.96e-06	1
AIF1	1.20106	0.0007844	5.06e-06	1
CNIH4	1.17165	0.0008016	5.22e-06	1
LOC643007	1.23564	0.0008222	5.37e-06	1
HS.347034	1.21743	0.000824	5.41e-06	1
HSPE1	1.23198	0.0008493	5.59e-06	1
TPT1	1.19147	0.0008739	5.78e-06	1
LOC283412	1.20351	0.0008832	5.86e-06	1
UCP2	1.13443	0.0009069	6.07e-06	1
HMGB2	1.19574	0.0009069	6.09e-06	1
PI3	1.06872	0.000907	6.05e-06	1
CD160	1.21065	0.0009384	6.36e-06	1
RPL13A	1.19417	0.0009562	6.5e-06	1
CEBPZ	1.23793	0.0009624	6.59e-06	1
TIMM10	1.10595	0.0009632	6.57e-06	1
LOC648343	1.23305	0.0009655	6.64e-06	1
CMTM2	1.11123	0.001045	7.21e-06	1
COPS5	1.21877	0.001061	7.35e-06	1
TNFSF10	1.17371	0.001104	7.68e-06	1
ISG15	1.06485	0.001112	7.77e-06	1
LOC341457	1.17536	0.001133	7.94e-06	1
RPA3	1.19289	0.00126	8.87e-06	1
SF3B14	1.16768	0.001266	8.94e-06	1
RSAD2	1.0226	0.001286	9.11e-06	1
LGALS2	1.18231	0.001326	9.44e-06	1
RPL5	1.18991	0.001369	9.78e-06	1
BEX2	1.23244	0.001455	1.04e-05	1
RGS18	1.12473	0.001467	1.06e-05	1
HS.99472	1.14666	0.001488	1.08e-05	1
POLR3GL	1.24486	0.001493	1.08e-05	1
POLE4	1.15128	0.001509	1.1e-05	1
ITGA2B	1.13636	0.001535	1.12e-05	1
CD69	1.24891	0.001559	1.15e-05	1
LOC391356	1.21271	0.001612	1.19e-05	1
LDHB	1.12841	0.001646	1.22e-05	1
BSG	1.02051	0.001682	1.26e-05	1
MRPL1	1.23686	0.001682	1.25e-05	1
FGFBP2	1.1029	0.001691	1.27e-05	1
RPL13	1.20062	0.001733	1.31e-05	1
FCGR1B	1.11272	0.001744	1.32e-05	1
SRP14P1	1.18737	0.001787	1.36e-05	1
ZNHIT3	1.20525	0.001822	1.39e-05	1
FLJ11795	1.14639	0.001905	1.46e-05	1
LOC644642	1.05031	0.001905	1.46e-05	1
HS.86941	1.16023	0.001976	1.52e-05	1
LOC651149	1.13843	0.002113	1.63e-05	1
LOC440055	1.13804	0.002157	1.68e-05	1
C22ORF30	1.04439	0.00219	1.71e-05	1
MRPL50	1.17261	0.002209	1.73e-05	1
CAMP	1.00675	0.002303	1.81e-05	1
SRP19	1.20135	0.002407	1.9e-05	1
EMG1	1.19446	0.002629	2.09e-05	1
VCAN	1.14969	0.00271	2.17e-05	1
RPL34	1.19746	0.002718	2.16e-05	1
LOC730953	1.17509	0.002742	2.21e-05	1
IGLL1	1.09577	0.002879	2.32e-05	1
TAOK1	1.08413	0.002992	2.42e-05	1
RPS26P10	1.13753	0.002994	2.43e-05	1
CPA3	1.14168	0.003123	2.54e-05	1
PROS1	1.06338	0.003201	2.62e-05	1
COMMD8	1.17952	0.003218	2.65e-05	1
LOC388720	1.14443	0.003226	2.65e-05	1
LOC653147	1.18878	0.003232	2.67e-05	1
MS4A6A	1.16822	0.003238	2.68e-05	1
PSMC6	1.21492	0.003287	2.73e-05	1
LOC220433	1.09075	0.003316	2.77e-05	1
C1ORF41	1.19918	0.003379	2.85e-05	1
SLC45A3	1.14916	0.003388	2.85e-05	1
HS.544988	1.05274	0.003466	2.93e-05	1
GTSCR1	1.19818	0.003482	2.96e-05	1
LOC284821	1.14811	0.003516	3e-05	1
LOC441763	1.01947	0.00361	3.09e-05	1
MRPL36	1.19048	0.003657	3.14e-05	1
C9ORF95	1.19489	0.00373	3.22e-05	1
C16ORF61	1.178	0.003797	3.28e-05	1
LOC402251	1.14508	0.003811	3.31e-05	1
EEF1D	1.21212	0.003813	3.32e-05	1
ATP5F1	1.17481	0.003824	3.34e-05	1
TMEM126B	1.17897	0.003869	3.39e-05	1
RPL26L1	1.17883	0.003995	3.52e-05	1
BMP8B	1.1012	0.004	3.51e-05	1
KIR2DL1	1.0644	0.004071	3.62e-05	1
CISD1	1.18737	0.004073	3.61e-05	1
LOC653505	1.14351	0.004078	3.6e-05	1
SEC11C	1.2025	0.004088	3.66e-05	1
HDDC2	1.20453	0.004096	3.65e-05	1
NUDT2	1.20642	0.004227	3.79e-05	1
MGC29506	1.16564	0.004379	3.96e-05	1
LOC645683	1.17938	0.004416	4.02e-05	1
SOD1	1.18821	0.004417	4.01e-05	1
VAMP8	1.1485	0.004428	4.04e-05	1
LOC645138	1.12145	0.004433	4.06e-05	1
LOC642035	1.1632	0.004435	4.07e-05	1
LOC643011	1.10181	0.004684	4.31e-05	1
SNX2	1.20163	0.004741	4.38e-05	1
CACNA1I	1.18723	0.004747	4.41e-05	1
IFIT3	1.04145	0.004749	4.4e-05	1
KIR3DL3	1.11982	0.004783	4.47e-05	1
MDH1	1.18596	0.004796	4.47e-05	1
MGC4677	1.11657	0.004836	4.53e-05	1
LOC641710	1.11582	0.004932	4.63e-05	1
MTIF3	1.18568	0.00503	4.74e-05	1
LOC127295	1.15701	0.00519	4.9e-05	1
IAH1	1.1755	0.005254	4.99e-05	1
LY6E	1.08589	0.005266	4.99e-05	1
LOC440993	1.17165	0.005316	5.09e-05	1
DNAJA1	1.16077	0.005344	5.13e-05	1
GATA2	1.10975	0.005661	5.45e-05	1
LOC401397	1.15808	0.005748	5.55e-05	1
EBI2	1.1812	0.005774	5.59e-05	1
EIF2AK2	1.10241	0.005783	5.63e-05	1
C21ORF81	1.15687	0.005791	5.62e-05	1
KCTD7	1.12461	0.005991	5.85e-05	1
PASK	1.1542	0.006003	5.88e-05	1
RPLP0	1.12549	0.006053	5.94e-05	1
LOC649548	1.13507	0.006204	6.12e-05	1
DNAJC8	1.17813	0.006245	6.18e-05	1
RPS4X	1.12196	0.006308	6.26e-05	1
GTF3A	1.19119	0.006362	6.33e-05	1
LOC647856	1.16645	0.006371	6.35e-05	1
HS.191464	1.10877	0.006381	6.38e-05	1
GSTM2	1.0018	0.006407	6.44e-05	1
HS.551815	1.1609	0.006409	6.43e-05	1
AP1S2	1.12625	0.006425	6.48e-05	1
LOC649049	1.10314	0.006457	6.52e-05	1
NFIX	1.03552	0.006472	6.56e-05	1
CD48	1.12296	0.006481	6.58e-05	1
MGC72104	1.13636	0.006639	6.76e-05	1
LGALS1	1.13973	0.006653	6.81e-05	1
UBL5	1.13494	0.006661	6.8e-05	1
SGSH	1.16891	0.006704	6.88e-05	1
SLC5A8	1.08413	0.006873	7.07e-05	1
HS.534061	1.03061	0.00689	7.11e-05	1
HS.577763	1.11148	0.007041	7.32e-05	1
OLFM4	1.05664	0.007043	7.29e-05	1
LOC647834	1.08507	0.007054	7.31e-05	1
MRPS33	1.20729	0.007094	7.41e-05	1
SLPI	1.09087	0.007106	7.41e-05	1
MRPL14	1.16279	0.007107	7.45e-05	1
LOC652694	1.08038	0.007169	7.55e-05	1
TMEM156	1.12575	0.007172	7.53e-05	1
VIPR1	1.17495	0.007295	7.7e-05	1
LOC651763	1.07817	0.007398	7.83e-05	1
NDUFAF2	1.18568	0.007456	7.91e-05	1
FAM14A	1.15594	0.007456	7.93e-05	1
SEC11A	1.17702	0.007501	8e-05	1
HS.282397	1.05854	0.0076	8.12e-05	1
TBC1D10B	1.0101	0.007858	8.42e-05	1
RARS	1.19703	0.007869	8.47e-05	1
ATP5J2	1.16741	0.007872	8.45e-05	1
C11ORF46	1.14364	0.007873	8.5e-05	1
C6ORF129	1.1744	0.007971	8.62e-05	1
IGBP1	1.15875	0.008078	8.76e-05	1
CYP1B1	1.09146	0.008311	9.08e-05	1
KRT72	1.07701	0.008329	9.08e-05	1
MFHAS1	1.18878	0.008352	9.15e-05	1
C8ORF40	1.19962	0.008582	9.42e-05	1
TSHZ2	1.17	0.008616	9.48e-05	1
MRPL33	1.1526	0.008757	9.66e-05	1
PARK7	1.17827	0.008879	9.84e-05	1
LYZ	1.11136	0.009083	0.0001009	1
LOC346950	1.08483	0.009115	0.0001015	1
SLU7	1.16904	0.009174	0.0001024	1
CWC15	1.15128	0.009264	0.0001039	1
PKP2	1.11982	0.009277	0.0001038	1
CCDC53	1.16333	0.009368	0.0001053	1
LOC651751	1.06849	0.009399	0.0001059	1
PSMA3	1.17675	0.009463	0.0001069	1
LOC441193	1.12676	0.009487	0.0001077	1
TNFRSF17	1.16401	0.009507	0.0001081	1
SFMBT2	1.15674	0.009511	0.0001084	1
LOC402694	1.14797	0.00954	0.0001093	1
HS.538099	1.12461	0.009543	0.0001091	1
LOC645018	1.05641	0.00972	0.0001118	1
GNL2	1.17137	0.009729	0.0001122	1
NOP5/NOP58	1.17689	0.009881	0.0001142	1
LOC347292	1.16144	0.01009	0.0001169	1
CD3G	1.11012	0.01013	0.000118	1
SRP9	1.15221	0.01015	0.0001179	1
DPH5	1.17883	0.01023	0.0001193	1
CCDC59	1.19161	0.01026	0.0001202	1
RPS27A	1.11719	0.01035	0.0001216	1
HS.562039	1.07747	0.01046	0.0001231	1
GZMB	1.09565	0.0107	0.0001262	1
ATP5EP2	1.11807	0.01092	0.0001294	1
FAM153B	1.09951	0.01092	0.0001291	1
RPL36	1.16945	0.01125	0.0001339	1
ZNF91	1.10583	0.01125	0.0001336	1
LOC649447	1.16239	0.01134	0.0001353	1
HOXC10	1.11346	0.01139	0.0001361	1
GEMIN6	1.16959	0.01143	0.0001373	1
CHD9	1.16496	0.01145	0.0001378	1
C14ORF142	1.17772	0.01145	0.0001372	1
C21ORF7	1.06689	0.01148	0.0001388	1
BXDC1	1.18666	0.0115	0.0001387	1
MGRN1	1.03445	0.0116	0.0001405	1
LOC653158	1.13507	0.01186	0.000144	1
ZBTB16	1.18441	0.0119	0.0001451	1
TIGA1	1.19204	0.01191	0.0001449	1
LOC648249	1.13469	0.01191	0.0001459	1
ZNF22	1.15875	0.01193	0.0001464	1
TMED4	1.12221	0.01211	0.0001489	1
IFNGR1	1.13792	0.01216	0.0001499	1
HS.563486	1.08992	0.01232	0.0001522	1
ACAT1	1.16104	0.01232	0.0001526	1
PDCD10	1.16496	0.01265	0.0001572	1
LOC134997	1.09806	0.01266	0.0001571	1
TBCA	1.16387	0.01269	0.0001581	1
EIF2A	1.19218	0.01292	0.0001613	1
CWF19L2	1.18343	0.01297	0.0001622	1
MATR3	1.14443	0.01304	0.0001635	1
HS.143018	1.10865	0.01313	0.0001649	1
FAM83F	1.03788	0.01319	0.0001664	1
LOC653316	1.11136	0.01321	0.0001663	1
GPR65	1.12347	0.01339	0.0001693	1
VBP1	1.1562	0.01343	0.0001702	1
CKS2	1.15287	0.01361	0.0001728	1
C12ORF62	1.14482	0.01368	0.0001745	1
LOC653702	1.18737	0.01397	0.0001785	1
ANKRD55	1.09987	0.014	0.0001796	1
U2AF1L2	1.12486	0.01401	0.0001794	1
TNFAIP6	1.05708	0.01403	0.0001815	1
RGS10	1.12347	0.01405	0.0001813	1
BPI	1.07021	0.01405	0.0001806	1
RPS13	1.15447	0.01407	0.0001812	1
LOC648659	1.2222	0.01412	0.000183	1
CRBN	1.18441	0.01448	0.0001881	1
LOC650263	1.06033	0.01453	0.0001892	1
DDX50	1.17633	0.01471	0.0001918	1
SLC35A1	1.13649	0.01511	0.0001975	1
ITGA3	1.16333	0.01526	0.0001999	1
PLA2G7	1.10583	0.01532	0.000201	1
HS.580457	1.09685	0.01583	0.0002085	1
PRDX1	1.12841	0.01601	0.0002114	1
GM2A	1.09987	0.01623	0.0002155	1
BOLA2	1.14273	0.01623	0.0002151	1
LOC643882	1.06621	0.01642	0.0002185	1
SFRS16	1.16632	0.01647	0.00022	1
LOC642678	1.06906	0.01649	0.0002198	1
RNASE6	1.06078	0.0166	0.0002226	1
PSMB7	1.1566	0.01662	0.0002234	1
PTPLAD2	1.01215	0.01696	0.0002283	1
MRPL40	1.16442	0.01701	0.0002294	1
HS.97779	1.10339	0.01707	0.0002312	1
HS.193767	1.09745	0.01709	0.0002309	1
MRPL32	1.15741	0.01746	0.0002379	1
HS.569831	1.05031	0.01746	0.0002374	1
CCR7	1.04756	0.01791	0.0002449	1
GDPD5	1.12549	0.01822	0.0002497	1
LOC728417	1.09529	0.01853	0.0002554	1
CCL3L3	1.04537	0.01855	0.0002552	1
CCT2	1.1374	0.01856	0.0002548	1
MAP2K1IP1	1.10266	0.01871	0.0002583	1
LOC646043	1.09661	0.01875	0.0002593	1
DDIT4	1.14771	0.01934	0.000268	1
KIAA0492	1.07793	0.01941	0.0002695	1
MS4A2	1.1636	0.01943	0.0002703	1
VPS29	1.15848	0.01946	0.0002713	1
RPS3	1.17302	0.01996	0.0002793	1
IGFBP1	1.02828	0.01999	0.0002808	1
DRAP1	1.11844	0.02	0.0002814	1
LINGO2	1.19019	0.02	0.0002793	1
LOC653157	1.11582	0.02008	0.0002831	1
EIF2C2	1.11645	0.02025	0.0002861	1
PRPH	1.10193	0.02027	0.0002869	1
STAG3L2	1.14325	0.02032	0.0002881	1
NBPF20	1.0226	0.02079	0.0002959	1
CRYZ	1.15781	0.02081	0.0002957	1
HS.436134	1.12714	0.02099	0.0002992	1
GPR56	1.05843	0.02136	0.0003057	1
KIAA0372	1.16428	0.02138	0.0003065	1
RPS5	1.14416	0.02178	0.0003134	1
TCN1	1.08038	0.02207	0.0003188	1
PIK3IP1	1.12867	0.02211	0.0003187	1
NDUFS3	1.13792	0.02231	0.000324	1
C6ORF125	1.16104	0.02231	0.0003234	1
HS.97696	1.126	0.0224	0.0003259	1
ARGLU1	1.12956	0.02349	0.0003423	1
SSTR2	1.02396	0.02373	0.0003477	1
CD3E	1.05686	0.02375	0.0003475	1
FLJ11783	1.16836	0.02383	0.0003499	1
PLRG1	1.1554	0.02388	0.0003518	1
HMG2L1	1.04932	0.02396	0.0003537	1
NLRP8	1.11148	0.02427	0.0003595	1
SDPR	1.05585	0.02444	0.0003627	1
NECAP2	1.06975	0.02444	0.0003633	1
MRLC2	1.15101	0.02451	0.000365	1
C6ORF170	1.07504	0.02457	0.0003666	1
PTPRCAP	1.13533	0.0246	0.0003682	1
TCEAL8	1.17192	0.02461	0.0003678	1
NME1	1.1566	0.02476	0.0003714	1
LOC643433	1.13675	0.02478	0.000373	1
COPS4	1.13507	0.02482	0.0003742	1
SELK	1.09302	0.02491	0.0003769	1
TXNDC9	1.11445	0.02491	0.0003762	1
C9ORF130	1.0268	0.02494	0.000378	1
H1F0	1.11198	0.02573	0.0003921	1
COQ5	1.13947	0.02614	0.0003989	1
MRPL17	1.1217	0.02626	0.0004015	1
LOC646562	1.05263	0.02634	0.0004034	1
MRPS21	1.1722	0.02637	0.0004046	1
SCOC	1.13225	0.02642	0.0004061	1
EPC1	1.13263	0.02642	0.0004075	1
NPCDR1	1.08342	0.02646	0.0004074	1
METTL5	1.13856	0.02664	0.0004122	1
RPS9	1.13675	0.02669	0.0004122	1
ATP6V1D	1.11025	0.02672	0.0004141	1
LOC152578	1.04548	0.02719	0.0004229	1
IL8	1.05574	0.02738	0.0004265	1
LOC641693	1.10889	0.0274	0.0004276	1
PAM	1.07342	0.02758	0.0004318	1
LOC647074	1.09625	0.02759	0.000435	1
HS.554324	1.09111	0.0276	0.0004344	1
CREBZF	1.16036	0.0276	0.0004314	1
SAMD9	1.08731	0.0276	0.0004337	1
PCYOX1	1.08992	0.02761	0.0004332	1
TRAPPC4	1.16973	0.02812	0.0004441	1
PCMT1	1.14521	0.02863	0.000456	1
SH2D1A	1.13033	0.02864	0.0004553	1
HS.452445	1.11857	0.02866	0.000455	1
CHST12	1.14521	0.02867	0.0004542	1
TMEM165	1.13443	0.02884	0.00046	1
STAB1	1.1217	0.02895	0.0004633	1
LOC613037	1.14012	0.02896	0.0004626	1
LOC400566	1.07411	0.02908	0.000467	1
CD79A	1.03455	0.0291	0.0004665	1
CEACAM6	1.0175	0.02911	0.0004682	1
POLR1E	1.16741	0.02943	0.0004741	1
HS.552025	1.05899	0.02997	0.0004835	1
XPNPEP2	1.11894	0.02999	0.0004847	1
GPR1	1.06929	0.03025	0.0004898	1
KIAA0748	1.10975	0.03046	0.0004947	1
G6PC	1.05175	0.03049	0.0004968	1
LSMD1	1.10705	0.03051	0.0004963	1
SPON2	1.14548	0.03056	0.0004996	1
C9ORF46	1.15875	0.03078	0.0005039	1
HS.470804	1.07066	0.03082	0.0005062	1
IL4R	1.10072	0.03083	0.0005057	1
MRPL15	1.10975	0.031	0.0005109	1
ITM2A	1.12133	0.03114	0.000514	1
FLNA	1.11185	0.03116	0.0005151	1
EOMES	1.07354	0.03133	0.0005188	1
LOC439949	1.0143	0.03138	0.0005222	1
HS.567464	1.10229	0.03142	0.0005244	1
CKLF	1.09373	0.03142	0.0005219	1
CD58	1.10693	0.03152	0.000527	1
HS.572649	1.09445	0.03181	0.0005327	1
SLC30A9	1.1426	0.03189	0.0005348	1
TAF7	1.12322	0.03192	0.0005362	1
LOC652624	1.11894	0.03192	0.000537	1
CRIP2	1.04701	0.03213	0.0005414	1
C21ORF128	1.06236	0.03217	0.000543	1
UBXD4	1.06998	0.03234	0.0005467	1
CLDND2	1.10363	0.03241	0.0005487	1
RTN2	1.14443	0.03252	0.0005523	1
LOC642210	1.12689	0.0326	0.0005562	1
MRP63	1.08015	0.03267	0.0005556	1
INDOL1	1.15022	0.0327	0.0005588	1
TRAT1	1.16185	0.03275	0.0005605	1
C4ORF33	1.13263	0.03284	0.0005637	1
GHDC	1.15194	0.03289	0.0005637	1
EIF4A2	1.15902	0.03313	0.0005704	1
PDAP1	1.16973	0.03376	0.0005823	1
C1ORF71	1.09254	0.03398	0.0005888	1
LOC648470	1.14403	0.03399	0.000588	1
LOC648003	1.06952	0.03401	0.0005901	1
MAL	1.10181	0.03431	0.0005962	1
ZBTB40	1.12397	0.03437	0.0005982	1
LOC387867	1.09075	0.03463	0.0006083	1
NUCB2	1.1325	0.03463	0.0006037	1
NDUFV2	1.15287	0.03467	0.0006081	1
ALS2CR14	1.01958	0.0347	0.0006067	1
LOC648099	1.11309	0.03472	0.0006079	1
CST7	1.08755	0.03474	0.0006065	1
HS.482960	1.07515	0.03479	0.0006139	1
ZMAT2	1.07089	0.03481	0.0006124	1
RIOK2	1.14863	0.03482	0.0006135	1
CHD8	1.13688	0.03499	0.0006183	1
HAT1	1.13379	0.03535	0.0006257	1
NAT5	1.16077	0.03547	0.0006287	1
LOC653226	1.11744	0.03567	0.0006331	1
C19ORF53	1.14416	0.03571	0.0006357	1
PIGK	1.15181	0.03574	0.0006372	1
TYW1	1.01031	0.03576	0.0006357	1
PPIG	1.13366	0.03627	0.0006476	1
CD320	1.11669	0.03641	0.0006511	1
ZRANB2	1.12082	0.03656	0.0006546	1
FRG1	1.0755	0.03701	0.0006658	1
C4BPA	1.02333	0.03702	0.000665	1
EVI5	1.02754	0.03704	0.0006643	1
PA2G4	1.07875	0.0371	0.0006683	1
PI16	1.09004	0.0372	0.0006722	1
HERC2	1.16877	0.03725	0.000672	1
IRS2	1.06474	0.03772	0.0006825	1
RPS11	1.10828	0.03776	0.0006862	1
C1ORF85	1.12322	0.03777	0.0006854	1
ASNSD1	1.08885	0.03781	0.0006852	1
C1ORF77	1.04406	0.03825	0.0006971	1
HS.580437	1.13701	0.03829	0.0006968	1
TXNDC12	1.12816	0.03839	0.0007047	1
LOC401677	1.12322	0.03841	0.000704	1
BXDC5	1.11919	0.03841	0.0007031	1
POU2F2	1.11957	0.03842	0.0007022	1
NDUFB7	1.13097	0.03861	0.0007119	1
GMFB	1.11321	0.03861	0.0007169	1
ANAPC10	1.14025	0.03866	0.0007169	1
ARG1	1.05197	0.03868	0.0007111	1
HMG1L1	1.08272	0.03868	0.0007151	1
CCDC71	1.16754	0.03868	0.0007161	1
SCARNA9	1.11769	0.03877	0.0007209	1
C1QB	1.11632	0.03914	0.000729	1
ARTN	1.05597	0.03918	0.0007306	1
RPAIN	1.16591	0.0395	0.0007376	1
SRGN	1.07562	0.03978	0.000745	1
MRPL21	1.13379	0.03988	0.0007479	1
NSMCE4A	1.16131	0.04006	0.0007523	1
SCGB3A1	1.08838	0.04091	0.0007694	1
LOC649150	1.06735	0.04106	0.0007733	1
CD24	1.05652	0.04138	0.0007816	1
PHF5A	1.1152	0.04138	0.0007805	1
AZU1	1.10717	0.04195	0.0007935	1
RSL1D1	1.12778	0.04202	0.0007958	1
ARID5B	1.13611	0.04224	0.0008023	1
CD19	1.04004	0.04228	0.0008019	1
ESCO1	1.14521	0.04229	0.0008054	1
GSTO1	1.12714	0.04234	0.0008052	1
LOC731985	1.10902	0.04244	0.0008094	1
AIM2	1.11957	0.04271	0.0008169	1
HS.444999	1.12829	0.04271	0.0008179	1
GIMAP2	1.06315	0.04282	0.0008212	1
USP16	1.16713	0.04367	0.0008398	1
CD27	1.06146	0.04391	0.0008468	1
DTWD2	1.01533	0.04406	0.0008508	1
VSTM1	1.05977	0.04409	0.0008525	1
ABCB10	1.14758	0.04419	0.0008556	1
TTC30A	1.1207	0.04447	0.0008623	1
FLJ37396	1.06123	0.04499	0.0008747	1
ANXA3	1.07458	0.04503	0.0008743	1
SLC25A36	1.13533	0.0454	0.0008838	1
IL7R	1.08295	0.04542	0.0008854	1
NOC3L	1.1162	0.04544	0.000887	1
ITLN1	1.06417	0.04548	0.000889	1
MRPS28	1.11408	0.04561	0.0008964	1
LOC440927	1.11136	0.04565	0.0008936	1
ADAM7	1.11694	0.04567	0.0008963	1
ZNF557	1.04015	0.04571	0.000896	1
HS.57870	1.00381	0.0458	0.0009014	1
SH2D1B	1.0805	0.04605	0.0009088	1
ZNF302	1.15687	0.04606	0.0009076	1
FLJ10916	1.09004	0.0461	0.000911	1
CLDND1	1.15982	0.04626	0.0009152	1
C19ORF2	1.16144	0.04639	0.0009203	1
UCHL3	1.1279	0.04645	0.0009203	1
FLJ42957	1.10546	0.04681	0.0009299	1
ANKDD1A	1.04965	0.04726	0.0009402	1
AZI2	1.09673	0.04744	0.0009463	1
ZNF816A	1.13135	0.04749	0.0009459	1
CLNS1A	1.1374	0.04786	0.0009559	1
MGC5457	1.10668	0.04821	0.0009666	1
IL17RD	1.00705	0.04822	0.0009656	1
SPRYD5	1.07354	0.04827	0.0009691	1
C22ORF34	1.10877	0.04842	0.0009735	1
C19ORF30	1.14338	0.04877	0.0009818	1
SNRPF	1.11433	0.04968	0.001001	1
RPL12	1.10132	0.04979	0.001005	1
LOC649143	0.407	7.56e-20	2e-24	-1
HLA-A29.1	0.540541	8.09e-14	4.28e-18	-1
SERPINA13	0.751315	9.45e-11	7.5e-15	-1
MYOM2	0.68918	5.28e-10	5.59e-14	-1
HLA-DQB1	0.625	6.86e-10	9.07e-14	-1
RNF213	0.809061	1.16e-09	1.84e-13	-1
RAP1GAP	0.735294	1.18e-09	2.18e-13	-1
DPYSL5	0.760456	2.99e-09	6.32e-13	-1
LOC653600	0.824402	6.56e-09	1.74e-12	-1
LOC440313	0.77101	3.06e-08	8.89e-12	-1
HBG1	0.809717	4.7e-08	1.99e-11	-1
LOC652140	0.814996	4.72e-08	1.87e-11	-1
HBG2	0.8	5.02e-08	1.59e-11	-1
HBZ	0.81367	5.02e-08	1.86e-11	-1
LOC731682	0.694927	5.22e-08	1.8e-11	-1
DEFA3	0.915751	5.51e-08	2.48e-11	-1
DEFA1	0.876424	6.98e-08	3.32e-11	-1
LOC388588	0.8285	9.25e-08	4.9e-11	-1
LILRA3	0.680735	9.43e-08	4.74e-11	-1
GPR177	0.719942	1.35e-07	7.5e-11	-1
GPR175	0.788644	1.42e-07	8.26e-11	-1
LOC728358	0.906618	1.43e-07	8.67e-11	-1
LOC652616	0.718907	1.54e-07	9.75e-11	-1
C20ORF108	0.793651	1.74e-07	1.15e-10	-1
HBM	0.754148	2.11e-07	1.45e-10	-1
HLA-DRB4	0.760456	2.3e-07	1.64e-10	-1
SPRYD3	0.783085	3e-07	2.22e-10	-1
HIP1	0.76746	3.13e-07	2.4e-10	-1
KRT1	0.862069	3.52e-07	2.8e-10	-1
HS.544245	0.896057	3.59e-07	2.95e-10	-1
NCF1	0.757576	4.51e-07	3.82e-10	-1
RPS4Y1	0.728863	5.09e-07	4.44e-10	-1
LOC389599	0.747943	6.07e-07	5.46e-10	-1
LOC652968	0.958773	6.25e-07	5.79e-10	-1
GYPB	0.807754	6.98e-07	6.84e-10	-1
CFD	0.764526	7.14e-07	6.8e-10	-1
EPB49	0.844595	1.04e-06	1.04e-09	-1
LOC644852	0.834028	1.1e-06	1.13e-09	-1
LOC645284	0.948767	1.22e-06	1.3e-09	-1
IFITM3	0.838223	1.31e-06	1.43e-09	-1
ZNF683	0.818331	1.49e-06	1.65e-09	-1
MUC6	0.868056	1.52e-06	1.73e-09	-1
IL8RB	0.77101	2.1e-06	2.44e-09	-1
TNS1	0.784314	2.17e-06	2.64e-09	-1
NKX3-1	0.8285	2.18e-06	2.6e-09	-1
TMEM176A	0.843882	2.46e-06	3.06e-09	-1
HLA-DRB6	0.773994	2.56e-06	3.25e-09	-1
CCDC52	0.956023	2.6e-06	3.37e-09	-1
LOC440359	0.73692	2.82e-06	3.73e-09	-1
LOC654055	0.814332	3.76e-06	5.07e-09	-1
HBD	0.944287	4.59e-06	6.32e-09	-1
HS.571622	0.909091	5.29e-06	7.41e-09	-1
VWCE	0.820345	5.73e-06	8.18e-09	-1
CDC34	0.766871	7.33e-06	1.11e-08	-1
LRG1	0.75188	7.34e-06	1.07e-08	-1
LOC387686	0.914077	7.39e-06	1.1e-08	-1
LOC645128	0.792393	7.97e-06	1.22e-08	-1
RTF1	0.884956	8.07e-06	1.28e-08	-1
HS.565320	0.859845	8.19e-06	1.28e-08	-1
FFAR2	0.786782	8.25e-06	1.33e-08	-1
TRIM58	0.77821	9.87e-06	1.62e-08	-1
ALS2CR2	0.810373	9.98e-06	1.66e-08	-1
FOLR3	0.909091	1.08e-05	1.82e-08	-1
SLC6A10P	0.841043	1.46e-05	2.51e-08	-1
KIAA1324	0.893655	1.61e-05	2.82e-08	-1
RUNDC3A	0.819672	1.63e-05	2.89e-08	-1
FTHL3	0.791766	1.69e-05	3.03e-08	-1
LOC284422	0.860585	1.97e-05	3.6e-08	-1
HIST1H2BD	0.769823	2e-05	3.7e-08	-1
JARID1D	0.816993	2e-05	3.75e-08	-1
GUK1	0.793651	2.16e-05	4.1e-08	-1
JAK1	0.819672	2.21e-05	4.27e-08	-1
TMEM158	0.801925	2.27e-05	4.5e-08	-1
LCN2	0.894454	2.27e-05	4.45e-08	-1
MYL4	0.832639	2.28e-05	4.64e-08	-1
FAM46C	0.905797	2.29e-05	4.61e-08	-1
CA1	0.960615	2.36e-05	4.92e-08	-1
IFIT1L	0.874891	2.36e-05	4.88e-08	-1
EPB42	0.861326	2.46e-05	5.27e-08	-1
BLVRB	0.856164	2.48e-05	5.24e-08	-1
SELENBP1	0.864304	2.57e-05	5.58e-08	-1
ERAP2	0.904159	2.6e-05	5.71e-08	-1
HBQ1	0.825083	2.76e-05	6.13e-08	-1
SLC6A8	0.83612	3.02e-05	6.79e-08	-1
LOC653635	0.806452	3.08e-05	7.09e-08	-1
FCGR3A	0.837521	3.1e-05	7.04e-08	-1
LGALS3	0.958773	3.33e-05	7.76e-08	-1
HCG4	0.823723	3.49e-05	8.22e-08	-1
FPR2	0.814996	3.53e-05	8.41e-08	-1
D4S234E	0.815661	3.8e-05	9.14e-08	-1
NOV	0.805802	3.98e-05	9.68e-08	-1
TGM3	0.806452	4.01e-05	9.87e-08	-1
LYPD2	0.773994	4.2e-05	1.05e-07	-1
IGF2BP2	0.867303	4.48e-05	1.14e-07	-1
HLA-C	0.94162	4.69e-05	1.2e-07	-1
SLC4A1	0.914913	5.69e-05	1.48e-07	-1
P704P	0.809717	6.33e-05	1.66e-07	-1
IL1RN	0.778816	6.6e-05	1.75e-07	-1
LOC648796	0.853971	7.78e-05	2.08e-07	-1
ASPRV1	0.784314	7.85e-05	2.12e-07	-1
TESC	0.821693	7.88e-05	2.15e-07	-1
ARPC1B	0.83682	7.94e-05	2.19e-07	-1
LRRC25	0.810373	7.94e-05	2.23e-07	-1
WDR40A	0.838926	8.02e-05	2.23e-07	-1
HS.544409	0.902527	8.5e-05	2.41e-07	-1
RNF10	0.837521	8.8e-05	2.58e-07	-1
SIGLEC10	0.783699	8.85e-05	2.55e-07	-1
ADRA2C	0.984252	8.87e-05	2.58e-07	-1
UBXD1	0.840336	8.9e-05	2.64e-07	-1
CCR3	0.820345	8.92e-05	2.55e-07	-1
CEACAM8	0.97561	9.38e-05	2.81e-07	-1
FLJ11151	0.802568	9.72e-05	2.93e-07	-1
HIST1H2AC	0.814332	0.0001013	3.11e-07	-1
CDKN1C	0.796178	0.0001021	3.16e-07	-1
LOC643933	0.93633	0.0001076	3.36e-07	-1
FTHL8	0.807754	0.0001101	3.47e-07	-1
NCF2	0.8	0.0001118	3.58e-07	-1
PHLDB1	0.93985	0.000112	3.62e-07	-1
HS.534439	0.859845	0.0001124	3.57e-07	-1
HSPA1A	0.784929	0.0001129	3.67e-07	-1
MX1	0.946074	0.0001213	4.01e-07	-1
CD248	0.803213	0.0001217	3.99e-07	-1
CD8A	0.840336	0.0001248	4.16e-07	-1
LOC389286	0.83682	0.0001293	4.34e-07	-1
RHOB	0.823045	0.0001324	4.48e-07	-1
PIP5K2A	0.855432	0.0001333	4.58e-07	-1
GYPE	0.874126	0.0001337	4.56e-07	-1
NINJ1	0.785546	0.0001383	4.79e-07	-1
CDA	0.807103	0.000158	5.52e-07	-1
HIST1H4H	0.789889	0.0001589	5.63e-07	-1
FOXO4	0.821693	0.0001599	5.75e-07	-1
MBNL3	0.825083	0.0001601	5.63e-07	-1
GPR97	0.839631	0.0001609	5.75e-07	-1
CLEC12A	0.963391	0.0001611	5.92e-07	-1
HIST1H1C	0.805153	0.0001613	5.89e-07	-1
ALPL	0.884956	0.0001624	5.89e-07	-1
LOC402221	0.848896	0.0001831	6.83e-07	-1
HS.562660	0.813008	0.0001837	6.8e-07	-1
TSPAN5	0.87108	0.0001883	7.12e-07	-1
EIF1AY	0.879507	0.0001889	7.1e-07	-1
PDZK1IP1	0.88574	0.0001972	7.56e-07	-1
HAGH	0.839631	0.0001983	7.66e-07	-1
ACTRT1	0.837521	0.0002098	8.16e-07	-1
HIST2H2BE	0.81367	0.0002269	8.88e-07	-1
FLJ40722	0.962464	0.0002469	9.73e-07	-1
PANX2	0.815661	0.0002544	1.01e-06	-1
TREML2	0.807754	0.0002669	1.07e-06	-1
LOC651612	0.824402	0.0002701	1.09e-06	-1
HS.133050	0.998004	0.0002706	1.1e-06	-1
PGD	0.810373	0.0002791	1.15e-06	-1
FECH	0.908265	0.0002806	1.14e-06	-1
TLR1	0.825083	0.0002954	1.22e-06	-1
LILRA2	0.801925	0.0002978	1.24e-06	-1
PRKY	0.861326	0.0003017	1.26e-06	-1
ROPN1B	0.949668	0.0003052	1.28e-06	-1
HEMGN	0.844595	0.0003106	1.32e-06	-1
ZFP36L1	0.803213	0.0003115	1.33e-06	-1
TMEM140	0.825764	0.0003199	1.37e-06	-1
FTHL2	0.876424	0.0003406	1.47e-06	-1
B4GALT5	0.838223	0.000355	1.56e-06	-1
C5ORF4	0.86881	0.0003593	1.59e-06	-1
POLG	0.798085	0.0003746	1.7e-06	-1
FAM116B	0.924214	0.0003749	1.71e-06	-1
RBM38	0.851064	0.0003768	1.69e-06	-1
MSRB2	0.810373	0.000383	1.76e-06	-1
MANSC1	0.816327	0.000384	1.76e-06	-1
CHSY1	0.820345	0.0003909	1.81e-06	-1
STX11	0.814996	0.0003992	1.86e-06	-1
LOC399942	0.821018	0.000411	1.92e-06	-1
ZDHHC18	0.805802	0.0004179	1.98e-06	-1
MYADM	0.808407	0.0004228	2.01e-06	-1
CSDA	0.821018	0.0004234	2.03e-06	-1
IL1B	0.8	0.0004611	2.24e-06	-1
HPS1	0.84674	0.0004623	2.23e-06	-1
PRSS33	0.919963	0.0004627	2.24e-06	-1
HS.291319	0.974659	0.0004637	2.28e-06	-1
CDC42EP2	0.820345	0.000465	2.28e-06	-1
E2F2	0.873362	0.0004687	2.32e-06	-1
XK	0.933707	0.0004927	2.45e-06	-1
ST6GALNAC4	0.876424	0.0004997	2.5e-06	-1
FKSG30	0.856164	0.0005017	2.52e-06	-1
C16ORF35	0.877963	0.0005296	2.69e-06	-1
ALOX5AP	0.81367	0.0005306	2.68e-06	-1
SEC14L1	0.805153	0.0005565	2.87e-06	-1
LOC644063	0.858369	0.0005576	2.86e-06	-1
CYP27A1	0.873362	0.0005587	2.85e-06	-1
ASF1B	0.805153	0.0005744	2.98e-06	-1
F11R	0.813008	0.000582	3.03e-06	-1
FTHL12	0.829876	0.0006204	3.25e-06	-1
FBXO7	0.845309	0.0006272	3.3e-06	-1
ZFP36	0.832639	0.0006338	3.35e-06	-1
IKZF1	0.84674	0.0006583	3.5e-06	-1
DYSF	0.863558	0.000681	3.64e-06	-1
LRRN3	0.953289	0.0007372	3.96e-06	-1
BASP1	0.827815	0.0007478	4.06e-06	-1
P2RX1	0.834028	0.0007494	4.04e-06	-1
TMOD1	0.919963	0.0007595	4.14e-06	-1
FLJ14166	0.824402	0.0007613	4.17e-06	-1
PSMC4	0.859107	0.000777	4.28e-06	-1
LOC643319	0.857633	0.0007843	4.34e-06	-1
NOL10	0.877193	0.0008663	4.81e-06	-1
BCL2L1	0.911577	0.0009587	5.38e-06	-1
HS.149244	0.873362	0.0009717	5.48e-06	-1
TMEM86B	0.846024	0.0009805	5.55e-06	-1
SLC38A5	0.877193	0.0009816	5.58e-06	-1
RAB3IL1	0.882613	0.0009829	5.62e-06	-1
PGLYRP1	0.859107	0.001022	5.86e-06	-1
LOC647742	0.970874	0.001038	6.01e-06	-1
TGM2	0.831255	0.001039	5.99e-06	-1
KRT23	0.841043	0.001062	6.21e-06	-1
MMP9	0.942507	0.001064	6.28e-06	-1
FTHL11	0.845309	0.001064	6.19e-06	-1
LOC642103	0.909091	0.001064	6.25e-06	-1
MGC13005	0.83682	0.001071	6.34e-06	-1
FKBP8	0.929368	0.001122	6.74e-06	-1
ZFP36L2	0.877963	0.001124	6.72e-06	-1
IFI27	0.995025	0.001124	6.69e-06	-1
FRAT1	0.831255	0.00114	6.87e-06	-1
SERPINE2	0.837521	0.00117	7.15e-06	-1
MAEA	0.84674	0.001174	7.14e-06	-1
MCTP2	0.881834	0.001175	7.12e-06	-1
LOC642817	0.924214	0.001176	7.31e-06	-1
PIM1	0.813008	0.00118	7.31e-06	-1
OSBP2	0.971817	0.001182	7.28e-06	-1
LOC347376	0.869565	0.001187	7.28e-06	-1
HS.495041	0.853971	0.001225	7.65e-06	-1
OLIG2	0.914913	0.001237	7.76e-06	-1
NCF4	0.832639	0.001304	8.21e-06	-1
RALB	0.834725	0.001323	8.4e-06	-1
LPCAT2	0.940734	0.001324	8.44e-06	-1
LITAF	0.824402	0.00137	8.77e-06	-1
GMPR	0.92081	0.001387	8.95e-06	-1
IL8RA	0.841751	0.001409	9.24e-06	-1
HS.567460	0.928505	0.00141	9.21e-06	-1
HS.546375	0.914913	0.001411	9.18e-06	-1
ALAS2	0.942507	0.001414	9.17e-06	-1
PADI4	0.846024	0.00148	9.75e-06	-1
LOC732007	0.892061	0.001559	1.03e-05	-1
TARP	0.915751	0.00157	1.04e-05	-1
NAPSB	0.853971	0.001603	1.07e-05	-1
NADK	0.824402	0.001657	1.11e-05	-1
LOC643668	0.835422	0.001735	1.17e-05	-1
CHST13	0.938086	0.001736	1.18e-05	-1
LOC644250	0.942507	0.001736	1.18e-05	-1
CYP4F3	0.866551	0.001747	1.19e-05	-1
PTMA	0.969932	0.001754	1.2e-05	-1
CDH2	0.83682	0.0018	1.24e-05	-1
SELL	0.830565	0.001894	1.31e-05	-1
C13ORF18	0.85034	0.00208	1.44e-05	-1
PROK2	0.879507	0.002175	1.52e-05	-1
SLC25A39	0.804505	0.002176	1.53e-05	-1
LOC653994	0.88574	0.002178	1.53e-05	-1
HS.412918	0.924214	0.002238	1.58e-05	-1
IRF1	0.858369	0.002265	1.61e-05	-1
IKZF3	0.894454	0.002309	1.64e-05	-1
SLC43A2	0.854701	0.002312	1.65e-05	-1
HS.436060	0.892061	0.002332	1.67e-05	-1
NCF1B	0.858369	0.002363	1.7e-05	-1
CA4	0.870322	0.002435	1.78e-05	-1
ACSL1	0.860585	0.002441	1.78e-05	-1
PSG9	0.849618	0.002443	1.8e-05	-1
SESN3	0.958773	0.002448	1.78e-05	-1
ZNF467	0.876424	0.002456	1.78e-05	-1
CSF2RB	0.911577	0.002463	1.78e-05	-1
LOC441019	0.930233	0.002464	1.84e-05	-1
MAP7	0.82713	0.002471	1.84e-05	-1
RPS4Y2	0.898473	0.002472	1.83e-05	-1
LOC201175	0.844595	0.002476	1.84e-05	-1
BID	0.821018	0.002491	1.88e-05	-1
ACTA2	0.881834	0.002503	1.89e-05	-1
ADIPOR1	0.859845	0.002506	1.9e-05	-1
F2RL1	0.856164	0.002518	1.95e-05	-1
KIAA1949	0.832639	0.002524	1.94e-05	-1
MME	0.865052	0.002525	1.92e-05	-1
IL6R	0.913242	0.002527	1.93e-05	-1
SNCA	0.968054	0.002528	1.94e-05	-1
TMEM91	0.831947	0.002531	1.96e-05	-1
NR1D1	0.931966	0.002547	1.98e-05	-1
SDCBP	0.854701	0.002595	2.03e-05	-1
GP9	0.879507	0.002598	2.03e-05	-1
PHOSPHO1	0.846024	0.002647	2.09e-05	-1
FBXO33	0.84317	0.002649	2.09e-05	-1
SMOX	0.856164	0.002654	2.09e-05	-1
EHD1	0.840336	0.002672	2.12e-05	-1
GPR162	0.86881	0.002808	2.24e-05	-1
HS.512096	0.899281	0.002823	2.26e-05	-1
PGAM1	0.888099	0.002888	2.32e-05	-1
SH2B2	0.84317	0.002893	2.33e-05	-1
HS.564949	0.902527	0.002894	2.34e-05	-1
PSG3	0.84246	0.002952	2.4e-05	-1
TUBA1C	0.875657	0.002961	2.4e-05	-1
OR2W3	0.892061	0.00304	2.48e-05	-1
LBA1	0.838223	0.003053	2.5e-05	-1
HIST1H2BC	0.829876	0.003129	2.57e-05	-1
PPP2R5B	0.853242	0.003139	2.6e-05	-1
NFE2	0.84317	0.003142	2.61e-05	-1
HLA-G	0.859107	0.003377	2.81e-05	-1
TLE3	0.877193	0.003453	2.89e-05	-1
GSTM1	0.979432	0.003484	2.92e-05	-1
WIPF1	0.839631	0.003511	2.96e-05	-1
KIAA0513	0.84246	0.00357	3.02e-05	-1
LOC646531	0.86881	0.003707	3.18e-05	-1
GSTT1	0.969932	0.003711	3.15e-05	-1
C7ORF27	0.88574	0.003717	3.18e-05	-1
PIK3AP1	0.884173	0.003832	3.3e-05	-1
ZNF223	0.977517	0.003835	3.32e-05	-1
OLIG1	0.877193	0.003841	3.31e-05	-1
GTF2IP1	0.865052	0.004089	3.55e-05	-1
JMJD3	0.856898	0.004187	3.64e-05	-1
CD300C	0.887311	0.004191	3.66e-05	-1
HCLS1	0.848176	0.00421	3.69e-05	-1
GLRX5	0.928505	0.00427	3.75e-05	-1
MAP1LC3A	0.830565	0.004281	3.77e-05	-1
LOC653778	0.884173	0.004322	3.82e-05	-1
ZMIZ1	0.848176	0.004342	3.86e-05	-1
NINJ2	0.864304	0.004379	3.9e-05	-1
SLC2A14	0.864304	0.004418	3.96e-05	-1
HS.520591	0.944287	0.004435	4.04e-05	-1
SRXN1	0.894454	0.004436	4.02e-05	-1
SNAP23	0.834028	0.004444	4.02e-05	-1
PI4KAP1	0.876424	0.004453	4e-05	-1
SPI1	0.891266	0.004456	4.02e-05	-1
HS.193406	0.845309	0.004526	4.13e-05	-1
FPR1	0.88574	0.004529	4.16e-05	-1
RPS23	0.948767	0.004543	4.18e-05	-1
SIPA1L3	0.925926	0.004617	4.26e-05	-1
LSP1	0.876424	0.004632	4.29e-05	-1
TST	0.84674	0.00465	4.33e-05	-1
FIBCD1	0.88574	0.004661	4.33e-05	-1
HS.553301	0.906618	0.004667	4.36e-05	-1
CHURC1	0.976563	0.004674	4.39e-05	-1
SGK	0.840336	0.004686	4.39e-05	-1
BEST1	0.853242	0.004779	4.51e-05	-1
HS.562943	0.903342	0.004917	4.66e-05	-1
OKL38	0.869565	0.004988	4.74e-05	-1
BCL3	0.861326	0.004998	4.79e-05	-1
LOC729905	0.855432	0.005008	4.78e-05	-1
CYORF15A	0.925069	0.005016	4.78e-05	-1
MOSC1	0.88968	0.00505	4.85e-05	-1
MED25	0.851064	0.005093	4.9e-05	-1
LOC284988	0.851789	0.005097	4.92e-05	-1
RGL4	0.853971	0.005122	4.99e-05	-1
CEBPB	0.859845	0.005124	4.97e-05	-1
C20ORF27	0.843882	0.005136	4.97e-05	-1
YPEL3	0.837521	0.005167	5.04e-05	-1
ARHGAP30	0.838926	0.005272	5.16e-05	-1
LOC255783	0.859107	0.005299	5.24e-05	-1
PF4V1	0.895255	0.005308	5.24e-05	-1
LOC646508	0.899281	0.005322	5.28e-05	-1
DAPK2	0.855432	0.00541	5.38e-05	-1
MKRN1	0.878735	0.005536	5.54e-05	-1
PTGDS	0.938967	0.00554	5.53e-05	-1
TRIOBP	0.824402	0.005556	5.6e-05	-1
MOBKL2A	0.847458	0.005556	5.59e-05	-1
VAV3	0.87184	0.005566	5.58e-05	-1
GNAQ	0.921659	0.005659	5.72e-05	-1
IPO8	0.897666	0.005664	5.74e-05	-1
GPX1	0.890472	0.005868	5.96e-05	-1
ANP32A	0.870322	0.005995	6.11e-05	-1
CD97	0.865801	0.006012	6.14e-05	-1
NCF1C	0.847458	0.006187	6.35e-05	-1
C16ORF57	0.849618	0.006277	6.46e-05	-1
NAPSA	0.855432	0.006298	6.5e-05	-1
HS.356079	0.906618	0.006361	6.58e-05	-1
SIRPB1	0.884173	0.006383	6.64e-05	-1
ADM	0.870322	0.006388	6.62e-05	-1
NFIL3	0.852515	0.006405	6.68e-05	-1
ARF3	0.834725	0.006432	6.72e-05	-1
HIST1H2BK	0.84246	0.006596	6.91e-05	-1
TM6SF1	0.874126	0.006643	6.98e-05	-1
ACTR3	0.908265	0.006734	7.09e-05	-1
LOC644774	0.904159	0.00674	7.13e-05	-1
HIST2H2AA3	0.87184	0.006749	7.12e-05	-1
ESPN	0.880282	0.006758	7.17e-05	-1
MAFB	0.870322	0.00711	7.6e-05	-1
FRAT2	0.859845	0.007123	7.59e-05	-1
LOC652826	0.880282	0.007215	7.73e-05	-1
IFI6	0.95057	0.007264	7.82e-05	-1
MAST3	0.860585	0.007271	7.81e-05	-1
GNG2	0.87108	0.007295	7.87e-05	-1
HLA-E	0.847458	0.007306	7.9e-05	-1
LOC728643	0.868056	0.007405	8.03e-05	-1
NR2C2	0.927644	0.007421	8.07e-05	-1
SULF2	0.875657	0.007436	8.1e-05	-1
PFKFB3	0.870322	0.007456	8.15e-05	-1
PRDX2	0.88968	0.007529	8.25e-05	-1
TGFA	0.845309	0.007596	8.36e-05	-1
GSPT1	0.896861	0.007605	8.35e-05	-1
C1ORF24	0.884956	0.007617	8.4e-05	-1
BPGM	0.913242	0.007782	8.63e-05	-1
IFIT2	0.918274	0.008119	9.02e-05	-1
NUAK2	0.862069	0.008147	9.07e-05	-1
LYL1	0.862069	0.0082	9.18e-05	-1
LOC646463	0.84674	0.008205	9.16e-05	-1
LCP2	0.855432	0.008355	9.39e-05	-1
CARS2	0.84246	0.008364	9.38e-05	-1
GATA1	0.919963	0.008369	9.43e-05	-1
NRGN	0.958773	0.008428	9.52e-05	-1
FOS	0.896057	0.00849	9.61e-05	-1
MAPK3	0.835422	0.008508	9.68e-05	-1
HIST1H2BE	0.868056	0.008525	9.67e-05	-1
APOBEC3A	0.961538	0.00854	9.74e-05	-1
HS.409730	0.972763	0.008625	9.86e-05	-1
ABHD5	0.8726	0.008894	0.0001021	-1
C19ORF22	0.882613	0.008932	0.0001028	-1
GYPC	0.907441	0.008949	0.0001032	-1
MPEG1	0.88574	0.009023	0.0001043	-1
MGC42367	0.891266	0.009038	0.0001047	-1
TAGLN2	0.848176	0.009046	0.0001053	-1
LOC650919	0.862813	0.009058	0.0001057	-1
TLR6	0.893655	0.009059	0.0001066	-1
LOC654155	0.884956	0.009062	0.0001052	-1
TFF3	0.904159	0.009062	0.0001069	-1
HERC3	0.913242	0.009075	0.0001061	-1
LYN	0.853242	0.009079	0.0001066	-1
IL18RAP	0.962464	0.009106	0.0001077	-1
LASP1	0.855432	0.009208	0.0001094	-1
TMPRSS9	0.865052	0.009216	0.0001092	-1
FCRLA	0.944287	0.00924	0.00011	-1
MT2A	0.930233	0.00925	0.0001104	-1
PILRA	0.852515	0.009331	0.0001118	-1
MBOAT7	0.891266	0.009348	0.0001118	-1
PFKFB4	0.873362	0.009505	0.0001144	-1
DAZAP2	0.866551	0.009539	0.0001151	-1
EEPD1	0.857633	0.009628	0.0001164	-1
ZNF185	0.873362	0.009812	0.0001194	-1
FCGR2A	0.857633	0.009832	0.0001194	-1
OASL	0.931966	0.009837	0.0001192	-1
SRRD	0.938086	0.00985	0.0001201	-1
NAPRT1	0.863558	0.01001	0.0001223	-1
ZNF264	0.838926	0.01001	0.0001226	-1
NDEL1	0.853971	0.01002	0.0001236	-1
CARM1	0.912409	0.01004	0.0001235	-1
CPEB4	0.929368	0.01006	0.0001234	-1
CEACAM1	0.86881	0.01006	0.0001243	-1
LOC648024	0.944287	0.01008	0.0001248	-1
VPREB3	0.923361	0.01012	0.0001255	-1
CNTNAP2	0.946074	0.01019	0.0001267	-1
FAM65A	0.856898	0.0102	0.0001279	-1
C18ORF10	0.904977	0.0102	0.0001277	-1
GPR109A	0.897666	0.01024	0.0001276	-1
RXRA	0.843882	0.01032	0.0001297	-1
NLRC5	0.894454	0.01044	0.0001314	-1
HS.544069	0.88574	0.01064	0.0001345	-1
RAB33B	0.932836	0.01064	0.0001343	-1
SEPX1	0.853971	0.01088	0.0001379	-1
PELI1	0.886525	0.01092	0.0001386	-1
RNF123	0.870322	0.01114	0.0001424	-1
EPSTI1	0.990099	0.01119	0.0001433	-1
CCNG2	0.866551	0.0112	0.0001437	-1
CHMP2A	0.844595	0.01127	0.0001449	-1
PAK2	0.843882	0.01129	0.0001454	-1
SLC31A2	0.880282	0.01142	0.0001474	-1
LOC643031	0.915751	0.01146	0.0001483	-1
HS.508682	0.879507	0.01152	0.0001493	-1
SRF	0.849618	0.01157	0.0001503	-1
IQGAP1	0.907441	0.01169	0.0001524	-1
GRINA	0.976563	0.0117	0.0001522	-1
HLA-DQA1	0.995025	0.01175	0.0001535	-1
C15ORF39	0.853971	0.01198	0.0001571	-1
HS.187290	0.931966	0.01208	0.0001588	-1
C20ORF100	0.888099	0.01224	0.0001612	-1
TRIM8	0.857633	0.01296	0.0001711	-1
C19ORF35	0.880282	0.01307	0.0001728	-1
LOC731777	0.881834	0.0132	0.0001749	-1
SLC6A6	0.903342	0.0134	0.000178	-1
LOC650832	0.891266	0.01352	0.0001807	-1
ETS2	0.857633	0.01354	0.0001806	-1
DMXL2	0.907441	0.01356	0.0001804	-1
HS.568928	0.854701	0.01362	0.0001822	-1
GALNAC4S-6ST	0.877963	0.01367	0.0001834	-1
FAM53C	0.883392	0.01387	0.0001864	-1
SOD2	0.881834	0.01396	0.000188	-1
GAST	0.87108	0.0142	0.000192	-1
SNAP29	0.840336	0.01428	0.0001934	-1
TUBB2A	0.976563	0.01432	0.0001951	-1
IFNGR2	0.860585	0.01432	0.0001943	-1
REPS2	0.881057	0.01434	0.000195	-1
KLRG1	0.930233	0.01445	0.0001972	-1
HS.144312	0.870322	0.01449	0.0001981	-1
HLA-H	0.891266	0.01453	0.0001991	-1
LOC649841	0.999001	0.01468	0.0002019	-1
DKFZP434K191	0.99108	0.01473	0.0002035	-1
GATS	0.862813	0.01473	0.000203	-1
GNLY	0.981354	0.01493	0.0002065	-1
NCOR1	0.884173	0.01522	0.0002109	-1
HES4	0.94162	0.01542	0.0002142	-1
COTL1	0.894454	0.01544	0.0002152	-1
RRAGD	0.879507	0.01545	0.000215	-1
ESAM	0.856898	0.01565	0.0002186	-1
HS.558488	0.869565	0.01566	0.0002199	-1
NAMPT	0.910747	0.01568	0.0002199	-1
EMR3	0.867303	0.01569	0.0002208	-1
HLX	0.88574	0.01576	0.0002222	-1
MARCH2	0.884956	0.01579	0.0002234	-1
PNPLA2	0.987167	0.0159	0.0002254	-1
WSB2	0.88968	0.01598	0.000227	-1
OR2AG1	0.877963	0.01601	0.0002279	-1
IGF2R	0.927644	0.01607	0.0002291	-1
LOC653498	0.915751	0.01624	0.0002324	-1
RHD	0.843882	0.01626	0.0002322	-1
CUEDC1	0.865801	0.01626	0.0002332	-1
PIK3CD	0.870322	0.01629	0.0002339	-1
S100A11	0.848176	0.01647	0.0002371	-1
LOC643738	0.863558	0.01648	0.0002376	-1
MEFV	0.876424	0.01661	0.0002412	-1
BDKRB1	0.980392	0.01662	0.000241	-1
LAG3	0.962464	0.01663	0.0002406	-1
LOC147804	0.87108	0.01687	0.0002454	-1
ARPC4	0.873362	0.01696	0.0002472	-1
JUNB	0.908265	0.01699	0.0002481	-1
VPS37C	0.859107	0.01704	0.0002493	-1
SKAP2	0.88574	0.0171	0.0002507	-1
DPM2	0.937207	0.01711	0.0002516	-1
MCOLN1	0.935454	0.01712	0.0002522	-1
LOC728070	0.88968	0.01713	0.0002515	-1
TNIP1	0.847458	0.01713	0.0002542	-1
CASC3	0.859107	0.01714	0.0002539	-1
CORO1A	0.866551	0.01717	0.0002539	-1
DGAT2	0.894454	0.01719	0.0002537	-1
CYBA	0.858369	0.0172	0.0002562	-1
GIT2	0.877963	0.01721	0.0002558	-1
LOC642178	0.876424	0.01751	0.0002612	-1
CHPT1	0.946074	0.01786	0.0002669	-1
LOC652755	0.93633	0.01868	0.0002797	-1
CREBBP	0.875657	0.01871	0.0002806	-1
MXI1	0.859845	0.01876	0.0002829	-1
IRF5	0.956023	0.01879	0.0002823	-1
ROPN1L	0.897666	0.01879	0.0002828	-1
LOC649946	0.974659	0.01893	0.0002879	-1
HS.163752	0.963391	0.01893	0.0002875	-1
NFS1	0.910747	0.01896	0.0002888	-1
ZRANB1	0.88574	0.019	0.0002899	-1
LOC653610	0.875657	0.01922	0.0002939	-1
CCL5	0.923361	0.01931	0.0002963	-1
USP10	0.909091	0.01933	0.0002961	-1
LOC728499	0.95511	0.01943	0.0002991	-1
KCNJ15	0.907441	0.0195	0.0003012	-1
WAS	0.86881	0.01953	0.0003022	-1
PPP1R15A	0.884173	0.01953	0.0003012	-1
LOC643313	0.969932	0.01991	0.0003086	-1
PLXNC1	0.984252	0.02025	0.0003144	-1
SERTAD2	0.8726	0.02031	0.0003159	-1
SNX10	0.896057	0.02047	0.0003189	-1
CD164	0.928505	0.02054	0.0003212	-1
ACTN1	0.886525	0.02055	0.0003218	-1
NOTCH1	0.925926	0.02056	0.0003209	-1
C9ORF62	0.965251	0.02058	0.0003228	-1
FLI1	0.914077	0.02074	0.0003258	-1
NUP62	0.881057	0.0209	0.0003289	-1
LTF	0.961538	0.02095	0.0003309	-1
RASGRP1	0.912409	0.02098	0.0003308	-1
SIGLEC5	0.897666	0.02119	0.0003358	-1
LOC730820	0.886525	0.0212	0.0003354	-1
EMR2	0.899281	0.02134	0.0003393	-1
LOC645609	0.849618	0.02134	0.0003387	-1
PICALM	0.875657	0.02137	0.0003404	-1
RAB11FIP1	0.862069	0.0214	0.0003413	-1
DHRS9	0.922509	0.02177	0.0003485	-1
AMY1A	0.965251	0.02195	0.0003519	-1
CD300LF	0.884173	0.02221	0.0003566	-1
QPCT	0.909918	0.02241	0.0003611	-1
TSPAN9	0.921659	0.02252	0.0003633	-1
BNIP3L	0.952381	0.02257	0.0003654	-1
IQWD1	0.88968	0.02277	0.0003692	-1
PLAUR	0.90009	0.02306	0.0003752	-1
SEPT5	0.909091	0.02306	0.0003746	-1
TBL1X	0.873362	0.02314	0.0003777	-1
ATG4B	0.917431	0.02326	0.0003802	-1
M6PRBP1	0.868056	0.02328	0.0003824	-1
LOC642377	0.987167	0.02329	0.000382	-1
ELOVL5	0.881057	0.02331	0.0003816	-1
FCGR3B	0.887311	0.02336	0.0003844	-1
ATG2A	0.881057	0.02344	0.000387	-1
SLC15A3	0.873362	0.02348	0.0003869	-1
MSRA	0.862813	0.02352	0.0003894	-1
STXBP2	0.923361	0.02354	0.0003904	-1
PIK3CG	0.903342	0.02385	0.0003963	-1
RIPK5	0.907441	0.02389	0.0003975	-1
ALDH5A1	0.881057	0.02404	0.0004019	-1
CXCR3	0.909918	0.02406	0.0004017	-1
LOC390466	0.886525	0.02406	0.000401	-1
CEACAM4	0.892857	0.0241	0.0004035	-1
UBE2O	0.95057	0.0242	0.0004059	-1
PPP1CA	0.909918	0.02427	0.0004083	-1
KLF13	0.880282	0.02438	0.0004107	-1
CAPZA1	0.970874	0.02439	0.0004135	-1
AMICA1	0.884956	0.02439	0.0004116	-1
LOC729021	0.957854	0.0244	0.0004124	-1
SH2D3C	0.87108	0.02442	0.0004133	-1
CAMK1D	0.934579	0.02459	0.0004195	-1
RBBP5	0.882613	0.0246	0.000419	-1
ANKRD33	0.860585	0.02461	0.0004186	-1
DPF2	0.856164	0.0248	0.0004238	-1
PTGES3	0.896057	0.02482	0.0004248	-1
CD81	0.906618	0.02487	0.0004263	-1
PIPSL	0.904159	0.02493	0.000428	-1
ALDOA	0.895255	0.02553	0.0004397	-1
YBX1	0.901713	0.02573	0.0004458	-1
TUBA1A	0.851789	0.02573	0.0004471	-1
SLA	0.873362	0.02574	0.0004466	-1
LILRA5	0.905797	0.02575	0.0004442	-1
KLRD1	0.957854	0.02575	0.0004481	-1
CDKN2D	0.873362	0.02579	0.0004455	-1
RNF144B	0.88574	0.02601	0.0004534	-1
SSH2	0.892061	0.02604	0.0004546	-1
HS.538418	0.8726	0.0261	0.0004571	-1
ARRDC3	0.917431	0.02612	0.0004568	-1
HOXB2	0.951475	0.02617	0.0004589	-1
SQSTM1	0.890472	0.02622	0.0004605	-1
HK2	0.874126	0.02645	0.0004653	-1
ATP6V0C	0.88574	0.02649	0.0004666	-1
RNF19B	0.967118	0.02661	0.0004703	-1
C10ORF26	0.926784	0.02663	0.0004699	-1
HIST1H3H	0.886525	0.02667	0.000472	-1
ZNFX1	0.899281	0.02669	0.0004738	-1
ADAM19	0.888889	0.0267	0.0004753	-1
APH1B	0.865801	0.02671	0.0004734	-1
PLA2G4C	0.895255	0.02673	0.0004751	-1
CNN2	0.882613	0.02675	0.0004769	-1
PTGS2	0.92081	0.02701	0.0004823	-1
PDK4	0.961538	0.02715	0.0004854	-1
NFKBIA	0.904977	0.02719	0.000487	-1
CBS	0.990099	0.02724	0.0004915	-1
LMO2	0.901713	0.02725	0.0004909	-1
JARID2	0.877963	0.02725	0.0004895	-1
KCTD10	0.899281	0.02726	0.0004903	-1
SELPLG	0.956938	0.02727	0.000489	-1
CCR1	0.894454	0.0274	0.0004964	-1
RHOG	0.866551	0.02741	0.0004951	-1
CTDSP2	0.880282	0.02742	0.0004962	-1
PID1	0.906618	0.02754	0.0005005	-1
FHL3	0.924214	0.02778	0.0005063	-1
DR1	0.892061	0.0278	0.0005059	-1
NAT8B	0.891266	0.0279	0.0005092	-1
RCSD1	0.854701	0.02811	0.0005138	-1
TSEN34	0.880282	0.02821	0.0005163	-1
TBC1D9	0.886525	0.02892	0.0005301	-1
SIAH2	0.940734	0.02899	0.0005321	-1
SLC2A6	0.881834	0.02901	0.0005334	-1
MAF1	0.894454	0.02906	0.0005351	-1
SLC2A3	0.88574	0.02912	0.0005368	-1
RNF11	0.919118	0.0292	0.0005391	-1
LOC641996	0.923361	0.02927	0.0005421	-1
ARPC5	0.858369	0.02971	0.0005509	-1
FICD	0.876424	0.02989	0.000555	-1
HN1	0.8726	0.03016	0.0005609	-1
LBR	0.949668	0.03023	0.0005645	-1
GPR146	0.944287	0.03027	0.0005645	-1
CEP27	0.990099	0.03029	0.0005641	-1
PTGS1	0.899281	0.03039	0.0005692	-1
LYSMD2	0.864304	0.03039	0.0005683	-1
VRK3	0.8726	0.03042	0.0005706	-1
PACSIN2	0.883392	0.03046	0.000572	-1
LOC643287	0.968054	0.03046	0.0005753	-1
LOC654103	0.900901	0.03047	0.0005746	-1
TFG	0.898473	0.03047	0.0005771	-1
HS.374460	0.927644	0.03049	0.0005766	-1
HS.580229	0.908265	0.03051	0.0005745	-1
PHC2	0.908265	0.03054	0.0005744	-1
TREM1	0.91659	0.03069	0.0005821	-1
TMBIM1	0.862069	0.03072	0.0005843	-1
MID1IP1	0.876424	0.03073	0.000586	-1
WIPI1	0.864304	0.03073	0.0005837	-1
JMJD1C	0.913242	0.03074	0.0005856	-1
UBE2H	0.902527	0.03088	0.0005898	-1
WARS	0.90009	0.03096	0.0005938	-1
NBPF10	0.968054	0.03097	0.0005923	-1
B9D2	0.893655	0.031	0.0005937	-1
EIF1B	0.881834	0.0312	0.0005992	-1
FBP1	0.874126	0.0313	0.0006019	-1
LOC441743	0.978474	0.03199	0.0006161	-1
ENC1	0.924214	0.03204	0.0006178	-1
TUBA4A	0.881057	0.03228	0.0006242	-1
PRR6	0.873362	0.0323	0.0006237	-1
HECA	0.901713	0.03251	0.0006304	-1
OSBPL2	0.878735	0.03255	0.0006303	-1
C22ORF13	0.900901	0.03255	0.0006321	-1
RAC2	0.862813	0.03379	0.0006579	-1
KRT3	0.96432	0.03382	0.0006575	-1
ACPT	0.926784	0.03385	0.0006607	-1
LOC389293	0.997009	0.03387	0.0006604	-1
PDLIM7	0.877963	0.034	0.0006646	-1
DUSP1	0.910747	0.03414	0.0006683	-1
GAB2	0.899281	0.03455	0.0006773	-1
CDC2L2	0.891266	0.03472	0.0006824	-1
CD46	0.910747	0.03472	0.0006815	-1
PTPRC	0.930233	0.03513	0.0006932	-1
TRIB1	0.884173	0.03513	0.0006943	-1
CENTD3	0.894454	0.03517	0.0006932	-1
CLOCK	0.856164	0.03519	0.0006925	-1
LOC400986	0.954198	0.03532	0.0006989	-1
TNFRSF1B	0.899281	0.03544	0.0007032	-1
MIDN	0.876424	0.03545	0.0007023	-1
C5AR1	0.902527	0.03552	0.0007055	-1
ANXA2P1	0.937207	0.03571	0.0007113	-1
PYGL	0.931099	0.03593	0.0007176	-1
C10ORF73	0.909918	0.03595	0.0007169	-1
HS.540965	0.90009	0.036	0.0007218	-1
MAK	0.917431	0.03601	0.0007202	-1
HIVEP1	0.874126	0.03603	0.0007215	-1
PLSCR3	0.943396	0.03604	0.0007236	-1
C8ORF45	0.951475	0.03615	0.0007276	-1
MGC13057	0.92081	0.03618	0.0007273	-1
ASCC2	0.925926	0.03642	0.0007341	-1
BLZF1	0.970874	0.03729	0.0007547	-1
PLEKHO2	0.876424	0.03731	0.000754	-1
GRB2	0.881057	0.03752	0.0007653	-1
LOC642934	0.925926	0.03753	0.0007663	-1
GHRL	0.879507	0.03754	0.0007616	-1
TMEM55A	0.906618	0.03755	0.0007609	-1
XYLT1	0.963391	0.03756	0.000764	-1
ERF	0.887311	0.03756	0.0007631	-1
GRN	0.907441	0.03756	0.000765	-1
LOC648210	0.960615	0.03761	0.0007691	-1
LIMK2	0.92081	0.03766	0.000771	-1
MIAT	0.962464	0.03787	0.0007773	-1
LOC650761	0.91659	0.0379	0.0007769	-1
LRP10	0.903342	0.03812	0.0007844	-1
IMPA2	0.892857	0.03814	0.0007838	-1
GPR44	0.972763	0.03823	0.0007888	-1
LOC646786	0.965251	0.03825	0.0007883	-1
HS.306876	0.869565	0.03854	0.0007971	-1
TNFSF14	0.928505	0.03855	0.0007964	-1
ARF1	0.869565	0.03857	0.000799	-1
HS.570385	0.94697	0.03868	0.0008022	-1
LOC653888	0.894454	0.03874	0.0008076	-1
DUSP6	0.917431	0.03878	0.0008074	-1
RAB5A	0.87108	0.03881	0.0008069	-1
RBPMS2	0.923361	0.03882	0.0008102	-1
FAM101B	0.92081	0.03885	0.0008066	-1
PLCG2	0.865052	0.03903	0.0008177	-1
PLAGL2	0.877193	0.03904	0.0008158	-1
TIMP2	0.896861	0.03931	0.0008245	-1
SLC25A37	0.887311	0.03949	0.0008294	-1
TSPAN1	0.868056	0.03991	0.0008393	-1
SLC30A3	0.905797	0.04031	0.0008487	-1
HS.555181	0.897666	0.04056	0.0008551	-1
BTN3A2	0.897666	0.04069	0.0008588	-1
ALOX5	0.905797	0.04094	0.0008664	-1
CLDN14	0.881057	0.04117	0.0008724	-1
PRIC285	0.97561	0.04123	0.0008769	-1
S100A4	0.88968	0.04126	0.0008763	-1
FAM49B	0.905797	0.0414	0.0008816	-1
SLC19A1	0.904977	0.04173	0.0008896	-1
RNPEP	0.931099	0.04178	0.0008918	-1
MBP	0.88968	0.04178	0.0008941	-1
YIPF3	0.874891	0.0418	0.0008957	-1
RP2	0.915751	0.04181	0.0008936	-1
SIPA1L2	0.956023	0.04205	0.0009022	-1
ARID1A	0.896861	0.04231	0.0009088	-1
LOC646447	0.969932	0.04256	0.0009153	-1
ZFAND3	0.878735	0.04258	0.000918	-1
DEDD2	0.862069	0.04259	0.0009171	-1
VASH1	0.932836	0.04269	0.0009215	-1
LOC646064	0.890472	0.04308	0.000931	-1
RPRC1	0.882613	0.04328	0.0009387	-1
SALL3	0.911577	0.0433	0.000938	-1
GPR109B	0.898473	0.04349	0.0009445	-1
LOC728452	0.938086	0.04389	0.0009543	-1
ORAI2	0.884173	0.0439	0.000957	-1
C1ORF176	0.938967	0.04392	0.0009561	-1
NDUFS2	0.882613	0.04418	0.000964	-1
DNAJB2	0.909091	0.0444	0.0009701	-1
MX2	0.919963	0.04449	0.0009734	-1
ANPEP	0.961538	0.04456	0.0009796	-1
HS.436679	0.865052	0.04458	0.0009787	-1
DNA2	0.914077	0.04459	0.0009778	-1
PAK1	0.867303	0.04461	0.0009819	-1
ODC1	0.908265	0.04464	0.0009778	-1
ZNF217	0.909918	0.04474	0.0009858	-1
FAM129A	0.946074	0.04474	0.000987	-1
MORF4L1	0.888099	0.04496	0.000993	-1
HS.150808	0.915751	0.04513	0.0009991	-1
PPTC7	0.876424	0.04514	0.001002	-1
BOK	0.994036	0.04516	0.001001	-1
MAP3K2	0.912409	0.04517	0.001004	-1
DVL3	0.881834	0.04529	0.001007	-1
SEPT7	0.956938	0.04556	0.001015	-1
PLCB2	0.886525	0.04559	0.001017	-1
ELL	0.905797	0.04565	0.001019	-1
NPL	0.907441	0.04606	0.001029	-1
PTMS	0.959693	0.04631	0.001036	-1
MNDA	0.93633	0.04639	0.001042	-1
JDP2	0.893655	0.04642	0.00104	-1
LOC643357	0.923361	0.04644	0.001042	-1
HS.574671	0.890472	0.04656	0.001047	-1
FAM21A	0.959693	0.04665	0.00105	-1
GK	0.914077	0.04691	0.001057	-1
KLHDC8B	0.937207	0.04703	0.001061	-1
LRRK2	0.927644	0.0474	0.001072	-1
TALDO1	0.877193	0.04753	0.001076	-1
LOC728411	0.910747	0.04763	0.00108	-1
AQP9	0.888889	0.04799	0.001089	-1
C1ORF55	0.888889	0.04849	0.001103	-1
PLCG1	0.895255	0.0485	0.001102	-1
MAP2K3	0.918274	0.04854	0.001106	-1
PCDHB9	0.999001	0.04857	0.001109	-1
AP1M1	0.876424	0.04862	0.001109	-1
PLSCR1	0.969932	0.04918	0.001124	-1
SLC4A5	0.994036	0.0494	0.00113	-1
KLF2	0.870322	0.04964	0.001138	-1
DARC	0.935454	0.04967	0.00114	-1
C10ORF54	0.909091	0.0498	0.001145	-1
PECAM1	0.892857	0.04982	0.001148	-1
FAM73A	0.993049	0.0499	0.001151	-1

## Sheet: E-MTAB-4890
Gene	FC	q.Value	p.Value	Direction
HBG1	2.01654	1.18e-17	5.32e-22	1
HBG2	1.95046	6.96e-17	6.28e-21	1
HBD	1.76211	6.53e-14	8.83e-18	1
GP9	1.68947	3.82e-12	6.89e-16	1
TSPAN18	1.6442	3.87e-12	8.73e-16	1
ERAF	1.57381	3.55e-10	9.6e-14	1
RBPMS2	1.59312	3.79e-10	1.2e-13	1
GZMH	1.52765	7.29e-10	2.63e-13	1
LGALS2	1.485	8.29e-10	3.36e-13	1
TSPAN33	1.56986	8.76e-10	4.74e-13	1
FBXW7	1.46994	9.06e-10	4.49e-13	1
PDK4	1.40213	9.24e-10	4.17e-13	1
HLA-DRB1	1.20817	3.07e-09	1.8e-12	1
HLA-DRB5	1.6442	4.53e-09	3.06e-12	1
TMEM158	1.45879	4.76e-09	3e-12	1
SH3KBP1	1.49544	6.45e-09	4.65e-12	1
HDC	1.39743	1.02e-08	7.8e-12	1
TSPAN9	1.45943	1.18e-08	9.59e-12	1
NFAT5	1.4043	1.19e-08	1.02e-11	1
RGS1	1.41483	1.27e-08	1.15e-11	1
SPOCD1	1.46049	1.36e-08	1.29e-11	1
CDK5RAP2	1.51492	1.54e-08	1.53e-11	1
PROS1	1.40845	2.68e-08	2.9e-11	1
VWF	1.41363	2.76e-08	2.86e-11	1
PVALB	1.40825	4.53e-08	5.11e-11	1
HBQ1	1.44571	4.71e-08	5.51e-11	1
RPS4Y1	1.07043	1.04e-07	1.32e-10	1
NAT8B	1.43678	1.06e-07	1.29e-10	1
GP6	1.40568	1.22e-07	1.59e-10	1
THBS1	1.39489	1.3e-07	1.76e-10	1
SPATA13	1.26904	1.65e-07	2.3e-10	1
PTGS1	1.41403	1.7e-07	2.45e-10	1
CTDSPL	1.36911	1.73e-07	2.65e-10	1
PPP3R1	1.46886	1.76e-07	2.62e-10	1
MYL4	1.42735	2.47e-07	4.01e-10	1
AQP9	1.40905	2.5e-07	3.94e-10	1
NFE2	1.39334	2.58e-07	4.31e-10	1
RBM43	1.30395	4.15e-07	7.11e-10	1
TNNT1	1.35318	4.97e-07	8.74e-10	1
JARID1D	1.09373	5.51e-07	9.93e-10	1
PRKY	1.07956	5.83e-07	1.08e-09	1
DKFZp686K16132	1.23993	7.42e-07	1.4e-09	1
MPL	1.32679	9e-07	1.79e-09	1
FAM46C	1.37268	9.33e-07	1.98e-09	1
LAIR2	1.31735	9.43e-07	2.08e-09	1
CD9	1.34571	9.53e-07	1.98e-09	1
SAMD14	1.36649	9.6e-07	2.08e-09	1
NPDC1	1.38619	9.71e-07	1.97e-09	1
MSL3L1	1.28041	1.04e-06	2.4e-09	1
MAF	1.40964	1.06e-06	2.39e-09	1
C1QA	1.28883	1.16e-06	2.76e-09	1
YTHDC1	1.23305	1.16e-06	2.82e-09	1
RXRB	1.39665	1.3e-06	3.28e-09	1
LIMS1	1.26454	1.45e-06	3.74e-09	1
ITGA2B	1.29366	1.84e-06	4.82e-09	1
CLDN5	1.36482	1.85e-06	4.91e-09	1
ASGR1	1.37589	2.23e-06	6.12e-09	1
CHST13	1.34228	2.25e-06	6.08e-09	1
MMP25	1.32538	2.34e-06	6.54e-09	1
DUSP2	1.25802	2.41e-06	6.95e-09	1
MAX	1.3541	2.43e-06	6.9e-09	1
TST	1.37419	2.49e-06	7.3e-09	1
HOXB2	1.36203	2.68e-06	7.98e-09	1
GNAZ	1.36836	2.69e-06	8.12e-09	1
SMARCD3	1.36556	3.14e-06	9.61e-09	1
AMMECR1	1.3624	3.14e-06	9.77e-09	1
CYorf15A	1.05597	3.46e-06	1.09e-08	1
PF4V1	1.12613	3.72e-06	1.21e-08	1
CDC2L2	1.22339	3.74e-06	1.2e-08	1
HBA1	1.31544	4.09e-06	1.35e-08	1
LY96	1.34535	4.12e-06	1.39e-08	1
MOBKL2C	1.36147	4.16e-06	1.39e-08	1
CYorf15B	1.02554	5.44e-06	1.86e-08	1
PDE5A	1.33387	5.69e-06	1.97e-08	1
FSTL1	1.25865	6.16e-06	2.17e-08	1
TMSB4Y	1.17	6.28e-06	2.24e-08	1
CABP5	1.3238	6.54e-06	2.36e-08	1
CTSL1	1.31648	6.91e-06	2.55e-08	1
SELP	1.32979	6.92e-06	2.53e-08	1
VENTX	1.28717	7.74e-06	2.9e-08	1
SIPA1L1	1.35962	8.29e-06	3.18e-08	1
FOSB	1.07712	8.32e-06	3.15e-08	1
SH3BGRL2	1.29249	8.34e-06	3.27e-08	1
HLA-DQB1	1.16809	8.75e-06	3.47e-08	1
PTPRC	1.27	9.19e-06	3.69e-08	1
TUBA1C	1.34138	9.21e-06	3.74e-08	1
HBB	1.34192	9.64e-06	4e-08	1
SLC1A7	1.32644	9.68e-06	4.1e-08	1
EIF2AK1	1.34553	9.71e-06	4.07e-08	1
S100P	1.29199	9.73e-06	3.99e-08	1
HIST1H2BD	1.18991	1.05e-05	4.47e-08	1
IKZF1	1.19574	1.08e-05	4.68e-08	1
PDGFRB	1.32433	1.15e-05	5.04e-08	1
GABARAPL1	1.31978	1.61e-05	7.12e-08	1
ACSBG1	1.30617	1.66e-05	7.47e-08	1
SYTL4	1.3031	1.66e-05	7.41e-08	1
MADD	1.34354	1.68e-05	7.66e-08	1
FOXP1	1.28304	1.7e-05	7.8e-08	1
PDZK1IP1	1.18977	1.7e-05	7.91e-08	1
RGS18	1.26151	1.71e-05	8.1e-08	1
PNMA3	1.25125	1.73e-05	8.09e-08	1
CLOCK	1.3289	1.76e-05	8.41e-08	1
PPP2R2B	1.30225	1.81e-05	8.72e-08	1
C1QB	1.29904	1.82e-05	8.87e-08	1
C7orf41	1.26422	1.91e-05	9.38e-08	1
MYEOV	1.32591	1.99e-05	1e-07	1
CLIC1	1.31337	2e-05	1e-07	1
ARHGAP21	1.31926	2.01e-05	9.97e-08	1
OXTR	1.31909	2.06e-05	1.05e-07	1
RAB11FIP5	1.30976	2.09e-05	1.07e-07	1
CAMP	1.06998	2.58e-05	1.34e-07	1
PRSS23	1.29032	2.59e-05	1.35e-07	1
DAB2	1.2631	2.69e-05	1.42e-07	1
PAPD5	1.31544	2.76e-05	1.51e-07	1
ABCA1	1.30124	2.77e-05	1.5e-07	1
OSBP2	1.28287	2.78e-05	1.48e-07	1
FPR1	1.29049	2.79e-05	1.5e-07	1
FAM13A1	1.31787	3.44e-05	1.89e-07	1
HIST2H2AC	1.3231	3.5e-05	1.94e-07	1
MPP1	1.27616	3.69e-05	2.06e-07	1
ABCC3	1.26438	3.74e-05	2.11e-07	1
HIRIP3	1.31216	4.21e-05	2.41e-07	1
TUBB1	1.2364	4.21e-05	2.39e-07	1
GM2A	1.29702	4.75e-05	2.76e-07	1
ZNF185	1.26727	4.76e-05	2.74e-07	1
FRMD3	1.20627	4.81e-05	2.82e-07	1
AK1	1.30412	4.88e-05	2.88e-07	1
SDPR	1.2288	4.99e-05	2.97e-07	1
ZNF467	1.30804	5.37e-05	3.22e-07	1
GNG11	1.25802	5.48e-05	3.34e-07	1
ANKDD1A	1.1946	5.5e-05	3.32e-07	1
NAPRT1	1.24906	6.29e-05	3.86e-07	1
C20orf94	1.27502	6.37e-05	3.93e-07	1
NOTCH1	1.29618	6.87e-05	4.31e-07	1
CAST	1.23655	6.89e-05	4.29e-07	1
DMN	1.22699	7.01e-05	4.46e-07	1
E2F2	1.27714	7.03e-05	4.44e-07	1
NFIB	1.28041	7.1e-05	4.54e-07	1
PI16	1.26807	7.11e-05	4.59e-07	1
ANKRD33	1.25802	7.26e-05	4.71e-07	1
DHRS9	1.25739	7.69e-05	5.02e-07	1
S100A6	1.29668	7.88e-05	5.19e-07	1
CLEC1B	1.22234	8.26e-05	5.47e-07	1
TAF15	1.20802	8.5e-05	5.67e-07	1
CD63	1.28999	9.17e-05	6.16e-07	1
TMEM140	1.23808	9.22e-05	6.23e-07	1
DCAKD	1.31527	9.32e-05	6.35e-07	1
MMRN1	1.28816	9.4e-05	6.44e-07	1
ZFAND2A	1.28816	9.63e-05	6.64e-07	1
PLOD2	1.27162	9.68e-05	6.72e-07	1
MGC13057	1.23092	9.8e-05	6.89e-07	1
CALML4	1.28156	0.0001056	7.47e-07	1
IRX3	1.24116	0.0001131	8.05e-07	1
BTBD12	1.30276	0.0001143	8.19e-07	1
HIST1H1C	1.27959	0.0001193	8.66e-07	1
CTSZ	1.18934	0.0001196	8.63e-07	1
C20orf55	1.28617	0.0001239	9.05e-07	1
C19orf59	1.23762	0.0001263	9.28e-07	1
DAP	1.28916	0.0001272	9.41e-07	1
MEIS1	1.21818	0.0001284	9.55e-07	1
IL4R	1.26088	0.0001338	1e-06	1
BTBD14A	1.2875	0.0001385	1.05e-06	1
C4orf18	1.22971	0.0001389	1.05e-06	1
ADM	1.25219	0.0001392	1.06e-06	1
CPSF1	1.26358	0.0001427	1.1e-06	1
CXorf20	1.23107	0.000143	1.11e-06	1
SMOX	1.24131	0.0001612	1.26e-06	1
ANKMY1	1.23655	0.000162	1.26e-06	1
ABR	1.30191	0.0001631	1.29e-06	1
TEP1	1.07458	0.0001633	1.3e-06	1
FADS3	1.28883	0.0001642	1.31e-06	1
PPIL3	1.25109	0.0001648	1.33e-06	1
TPCN2	1.27877	0.0001656	1.33e-06	1
IL12RB1	1.29032	0.0001658	1.35e-06	1
TNNC2	1.21847	0.000168	1.37e-06	1
CXCL5	1.22324	0.0001768	1.45e-06	1
CDKN1A	1.23533	0.0001773	1.46e-06	1
TP53I13	1.25078	0.0001817	1.52e-06	1
CTLA4	1.24766	0.0001824	1.52e-06	1
ZNF600	1.1919	0.0001845	1.56e-06	1
PADI4	1.23259	0.0001983	1.68e-06	1
SCARB1	1.24254	0.0002013	1.73e-06	1
PCNX	1.29232	0.0002023	1.72e-06	1
LILRB3	1.25929	0.0002161	1.87e-06	1
ACTA2	1.22384	0.0002318	2.02e-06	1
TMEM106C	1.29266	0.0002579	2.26e-06	1
ZNF438	1.28568	0.0002685	2.36e-06	1
DSC2	1.24549	0.0002686	2.37e-06	1
SLC26A11	1.28287	0.0002727	2.42e-06	1
TMEM144	1.24162	0.0002803	2.51e-06	1
LAG3	1.22805	0.0002807	2.51e-06	1
RALGDS	1.27243	0.0002811	2.54e-06	1
CDCA7	1.276	0.0002866	2.61e-06	1
NUAK1	1.25282	0.0002996	2.74e-06	1
PLOD1	1.26695	0.0003086	2.84e-06	1
PPIE	1.23107	0.0003145	2.92e-06	1
VNN1	1.15473	0.0003147	2.94e-06	1
ZNF683	1.01864	0.0003148	2.91e-06	1
EGR2	1.06519	0.0003197	3e-06	1
ST3GAL6	1.2458	0.0003288	3.1e-06	1
FLCN	1.21492	0.0003403	3.24e-06	1
TFPI	1.26791	0.0003557	3.4e-06	1
GP1BB	1.23655	0.0003584	3.44e-06	1
DUSP1	1.12082	0.000365	3.52e-06	1
UBXD4	1.26454	0.000374	3.64e-06	1
FLJ14213	1.22714	0.0003743	3.63e-06	1
MICB	1.24922	0.0003757	3.68e-06	1
F13A1	1.15942	0.0003806	3.74e-06	1
DPYSL4	1.17398	0.0004027	3.99e-06	1
P2RY13	1.15327	0.0004041	3.99e-06	1
BATF	1.2427	0.0004158	4.14e-06	1
C5orf4	1.20005	0.000429	4.29e-06	1
RORA	1.25929	0.0004425	4.45e-06	1
SNCA	1.20337	0.0004465	4.51e-06	1
KIR2DL3	1.14129	0.000447	4.53e-06	1
SRF	1.25992	0.0004667	4.75e-06	1
SLC25A14	1.27437	0.000482	4.95e-06	1
FAM118A	1.05753	0.0004837	4.95e-06	1
SGSH	1.27146	0.0004867	5.02e-06	1
CTSD	1.24394	0.000494	5.12e-06	1
VCL	1.23457	0.0005028	5.24e-06	1
SIPA1	1.25691	0.0005118	5.35e-06	1
CYB5R1	1.25913	0.0005211	5.52e-06	1
HIST1H2BG	1.18245	0.0005219	5.51e-06	1
UIMC1	1.26598	0.0005345	5.69e-06	1
ABTB1	1.24054	0.0005408	5.78e-06	1
CSDE1	1.25502	0.0005442	5.84e-06	1
SPSB3	1.26199	0.0005616	6.05e-06	1
NCKAP1	1.26183	0.0005658	6.12e-06	1
SLC2A6	1.23457	0.000567	6.16e-06	1
CD244	1.23548	0.000568	6.2e-06	1
SLC24A3	1.11919	0.0005855	6.41e-06	1
SIRT7	1.23442	0.0005922	6.57e-06	1
KCTD12	1.20729	0.0005946	6.57e-06	1
CD36	1.18963	0.0005956	6.55e-06	1
HIST1H4C	1.20062	0.000602	6.7e-06	1
TKTL1	1.1722	0.0006106	6.85e-06	1
ETFB	1.25219	0.0006106	6.83e-06	1
PROK2	1.17523	0.0006327	7.13e-06	1
CARD11	1.23503	0.000634	7.2e-06	1
IKZF3	1.20496	0.000635	7.19e-06	1
PSMD8	1.25439	0.0006383	7.28e-06	1
PGRMC1	1.19847	0.000677	7.75e-06	1
TCEAL3	1.26759	0.0007202	8.28e-06	1
APOBEC3A	1.10939	0.0007411	8.55e-06	1
RAB32	1.2335	0.0007429	8.64e-06	1
NINJ2	1.21729	0.0007442	8.62e-06	1
C15orf26	1.22279	0.0007479	8.73e-06	1
SLC41A3	1.24875	0.0007541	8.84e-06	1
KIAA0408	1.05274	0.0007586	8.93e-06	1
FLJ43339	1.23993	0.000777	9.21e-06	1
BAG4	1.22895	0.000778	9.19e-06	1
PRKDC	1.18008	0.000782	9.31e-06	1
C7orf27	1.24517	0.0008153	9.74e-06	1
ABLIM3	1.17841	0.0008171	9.8e-06	1
PACS1	1.22205	0.0008309	1e-05	1
CCDC23	1.26231	0.0008312	1e-05	1
LOC400566	1.02754	0.0008608	1.04e-05	1
JAM3	1.11595	0.000864	1.05e-05	1
HAVCR2	1.23472	0.0008677	1.09e-05	1
DDEF2	1.2161	0.000869	1.09e-05	1
XK	1.19246	0.0008703	1.08e-05	1
UTY	1.09004	0.0008718	1.09e-05	1
KIR2DL4	1.12867	0.0008731	1.08e-05	1
FAM120A	1.24969	0.0008732	1.08e-05	1
C5orf21	1.26024	0.0008738	1.07e-05	1
ST3GAL4	1.25235	0.0008993	1.13e-05	1
PPP1R15A	1.213	0.0009377	1.19e-05	1
EXOSC6	1.23426	0.0009471	1.2e-05	1
HES4	1.13934	0.0009617	1.23e-05	1
UNC119	1.2631	0.0009722	1.25e-05	1
CD3G	1.21065	0.0009754	1.25e-05	1
LCN2	1.13148	0.000977	1.26e-05	1
VPS16	1.24008	0.0009912	1.28e-05	1
EVA1	1.19875	0.001007	1.31e-05	1
LTB4R	1.2213	0.00101	1.31e-05	1
PYHIN1	1.23062	0.00101	1.32e-05	1
FLJ22531	1.22669	0.001014	1.33e-05	1
2002-03-01	1.16673	0.001036	1.36e-05	1
NR4A2	1.06826	0.001067	1.41e-05	1
FLJ45337	1.19632	0.001071	1.43e-05	1
GZMA	1.18723	0.001074	1.43e-05	1
FLJ20054	1.24642	0.001077	1.43e-05	1
HSPA6	1.12562	0.00108	1.45e-05	1
EOMES	1.18343	0.001086	1.46e-05	1
HMOX1	1.20351	0.001093	1.48e-05	1
SLC2A8	1.20294	0.001101	1.49e-05	1
FAM129B	1.22609	0.001136	1.55e-05	1
PLEK	1.23732	0.001143	1.56e-05	1
ATF5	1.22115	0.001145	1.57e-05	1
FOLR3	1.0101	0.001155	1.59e-05	1
GNL3L	1.17702	0.001156	1.59e-05	1
MIF4GD	1.24301	0.00116	1.61e-05	1
EDARADD	1.2219	0.001172	1.63e-05	1
CCDC92	1.23671	0.001178	1.64e-05	1
PAQR4	1.24378	0.001199	1.68e-05	1
CLEC12A	1.11185	0.001206	1.7e-05	1
HSPC159	1.21551	0.001208	1.7e-05	1
DKFZp434K191	1.19775	0.00124	1.76e-05	1
AFAP1	1.22971	0.001255	1.78e-05	1
MUC1	1.24969	0.001273	1.82e-05	1
INPPL1	1.23609	0.001275	1.82e-05	1
RHOC	1.21492	0.001287	1.85e-05	1
KIAA0195	1.25094	0.00129	1.85e-05	1
EGR1	1.01051	0.001291	1.86e-05	1
FAM53C	1.24131	0.001296	1.88e-05	1
RASSF4	1.22564	0.001305	1.89e-05	1
LOC728358	1.0445	0.001321	1.92e-05	1
HRB	1.22115	0.001331	1.96e-05	1
MAP4K5	1.24782	0.001334	1.96e-05	1
UBL4A	1.21007	0.001336	1.96e-05	1
NOD1	1.23747	0.001339	1.96e-05	1
CTTN	1.15101	0.001356	2.01e-05	1
OTUD5	1.24177	0.001357	2.02e-05	1
TAGLN	1.13097	0.001357	2.01e-05	1
C8orf16	1.1976	0.001365	2.04e-05	1
ITGB5	1.16986	0.001382	2.07e-05	1
PHGDHL1	1.25219	0.001394	2.09e-05	1
RSU1	1.13417	0.001395	2.1e-05	1
IRAK3	1.22489	0.001405	2.12e-05	1
FAM65A	1.21227	0.001426	2.16e-05	1
GRAMD1A	1.21212	0.001469	2.23e-05	1
PAK2	1.10877	0.001497	2.28e-05	1
POMT1	1.21566	0.001588	2.43e-05	1
ZNF672	1.22369	0.001609	2.47e-05	1
FAM14A	1.19962	0.001609	2.47e-05	1
FYTTD1	1.1868	0.001615	2.49e-05	1
PRPF19	1.23047	0.001649	2.55e-05	1
BRWD1	1.16727	0.001656	2.57e-05	1
MMD	1.14824	0.001671	2.6e-05	1
EDG2	1.18638	0.001685	2.63e-05	1
DKFZp761E198	1.06644	0.001705	2.67e-05	1
ASCC2	1.23701	0.001721	2.7e-05	1
TIMM10	1.20019	0.001726	2.72e-05	1
GNL1	1.23138	0.001726	2.75e-05	1
C14orf80	1.22745	0.001729	2.72e-05	1
GPR172A	1.24549	0.001729	2.74e-05	1
CRAT	1.21818	0.00173	2.75e-05	1
UNQ501	1.22399	0.001751	2.79e-05	1
HNMT	1.22264	0.001774	2.84e-05	1
SQRDL	1.21227	0.001814	2.91e-05	1
PIGX	1.16306	0.001816	2.92e-05	1
C8orf55	1.18991	0.001898	3.06e-05	1
MXD1	1.21714	0.001902	3.1e-05	1
SNN	1.19546	0.001905	3.1e-05	1
MAFB	1.14745	0.001906	3.09e-05	1
Sep-04	1.20409	0.001906	3.12e-05	1
IMPDH1	1.17758	0.002005	3.29e-05	1
GFOD2	1.23503	0.00203	3.34e-05	1
PIK3AP1	1.1217	0.002043	3.38e-05	1
GSTT1	1.08155	0.002046	3.38e-05	1
PDLIM1	1.14903	0.002079	3.45e-05	1
ZFP36	1.18022	0.002079	3.46e-05	1
PIAS3	1.2288	0.002088	3.48e-05	1
LTB	1.20613	0.002095	3.5e-05	1
MFAP3L	1.21981	0.002125	3.56e-05	1
FHL1	1.16537	0.002143	3.6e-05	1
CMTM5	1.14286	0.002149	3.62e-05	1
HIST1H2BJ	1.12854	0.002161	3.66e-05	1
WASF3	1.19962	0.002165	3.66e-05	1
NME4	1.16645	0.002203	3.74e-05	1
TMEM137	1.11086	0.002279	3.88e-05	1
KLHL22	1.23274	0.002285	3.9e-05	1
KCNJ2	1.10558	0.002343	4.01e-05	1
CCL5	1.14626	0.002395	4.11e-05	1
OSBPL5	1.19033	0.002415	4.16e-05	1
C1orf82	1.17426	0.002416	4.17e-05	1
CEP27	1.16659	0.00243	4.21e-05	1
TRIM10	1.24316	0.002434	4.24e-05	1
LOC196752	1.22384	0.002472	4.32e-05	1
NCF4	1.21936	0.002522	4.43e-05	1
FCGR2A	1.18133	0.002546	4.52e-05	1
OVGP1	1.19147	0.002549	4.52e-05	1
SFXN1	1.22956	0.002555	4.52e-05	1
SORT1	1.19489	0.002556	4.51e-05	1
GSTM3	1.13212	0.002658	4.74e-05	1
TRPC4AP	1.2108	0.002664	4.74e-05	1
C14orf169	1.22654	0.002729	4.88e-05	1
CBX3	1.15955	0.002737	4.91e-05	1
RUFY1	1.12625	0.002778	5e-05	1
MGC14376	1.17702	0.002829	5.1e-05	1
TREML1	1.16673	0.002879	5.22e-05	1
AHNAK	1.21168	0.002881	5.21e-05	1
CCDC49	1.20598	0.002898	5.3e-05	1
PPBP	1.11944	0.002899	5.28e-05	1
KIR3DL2	1.0322	0.002904	5.3e-05	1
DDIT4	1.02323	0.002937	5.39e-05	1
SLC16A5	1.21507	0.00294	5.41e-05	1
ARL2	1.20569	0.002994	5.52e-05	1
ITPA	1.22264	0.003037	5.63e-05	1
C1orf21	1.19818	0.003038	5.64e-05	1
HEXIM2	1.21921	0.003043	5.63e-05	1
MXRA7	1.213	0.003064	5.72e-05	1
ALOX5	1.17744	0.003067	5.74e-05	1
CD83	1.07112	0.003081	5.78e-05	1
GNA15	1.21521	0.003148	5.92e-05	1
KRTCAP2	1.22956	0.003155	5.94e-05	1
SIRPA	1.18526	0.003159	5.98e-05	1
S100A8	1.20511	0.003159	5.97e-05	1
SIL1	1.21168	0.003293	6.25e-05	1
PIGQ	1.20685	0.003294	6.28e-05	1
KHSRP	1.19933	0.0033	6.28e-05	1
RRAGD	1.21729	0.003341	6.39e-05	1
C3orf54	1.20077	0.003362	6.44e-05	1
DNHD2	1.17206	0.003405	6.55e-05	1
LOC201175	1.21981	0.003412	6.55e-05	1
TLR8	1.11458	0.003416	6.59e-05	1
GABARAP	1.19517	0.003423	6.62e-05	1
TRIB1	1.16279	0.003444	6.68e-05	1
TNFSF4	1.1919	0.003473	6.75e-05	1
SLC26A6	1.20715	0.0035	6.82e-05	1
SNF8	1.19789	0.003579	6.99e-05	1
CCDC106	1.16795	0.003587	7.02e-05	1
LGR6	1.17316	0.003595	7.05e-05	1
TETRAN	1.22609	0.003621	7.12e-05	1
SLC2A3	1.19546	0.003635	7.18e-05	1
CALD1	1.16754	0.003638	7.17e-05	1
NCOA4	1.20221	0.003708	7.37e-05	1
TMEM45B	1.17371	0.00371	7.36e-05	1
ATP2A3	1.17897	0.003795	7.6e-05	1
RNF113A	1.21315	0.003801	7.59e-05	1
DNAJB12	1.21684	0.003806	7.64e-05	1
PTGER4	1.21021	0.003809	7.59e-05	1
PIM1	1.21256	0.003842	7.72e-05	1
CA2	1.01843	0.003958	7.98e-05	1
WWP2	1.21758	0.00397	8.02e-05	1
AXUD1	1.16469	0.003972	8.07e-05	1
HES6	1.1744	0.003973	8.06e-05	1
RPS6KA3	1.13456	0.003984	8.12e-05	1
BIRC3	1.21684	0.004009	8.21e-05	1
S100A12	1.08354	0.00401	8.19e-05	1
PRR14	1.22474	0.004127	8.47e-05	1
PLD3	1.22055	0.00415	8.53e-05	1
IRF1	1.20322	0.004152	8.55e-05	1
TRIM24	1.2161	0.004176	8.62e-05	1
PTGER2	1.21212	0.004193	8.68e-05	1
RNF122	1.18835	0.0042	8.71e-05	1
IL8	1.05619	0.004221	8.77e-05	1
WDR41	1.14771	0.004252	8.89e-05	1
ANAPC4	1.20511	0.004354	9.13e-05	1
LOC729853	1.04515	0.004391	9.26e-05	1
GTF2H4	1.20846	0.004397	9.26e-05	1
ZNF364	1.17855	0.0044	9.32e-05	1
C17orf75	1.18343	0.004401	9.25e-05	1
ATF3	1.13212	0.004418	9.4e-05	1
CXCL16	1.18638	0.004423	9.39e-05	1
EBP	1.19318	0.004427	9.44e-05	1
RHOU	1.16401	0.004474	9.56e-05	1
CST7	1.09926	0.004534	9.71e-05	1
NT5C3L	1.21477	0.004534	9.73e-05	1
C19orf12	1.20163	0.004601	9.89e-05	1
HIST1H3F	1.07066	0.004626	0.0001001	1
CA1	1.20496	0.004631	0.0001004	1
C6orf21	1.16741	0.004633	0.0001	1
OSM	1.1566	0.004761	0.0001035	1
EPB41L3	1.1558	0.004772	0.0001039	1
VNN3	1.15888	0.004847	0.0001057	1
MC1R	1.18413	0.004951	0.0001082	1
ODC1	1.1538	0.004953	0.000109	1
SPINT2	1.21655	0.004962	0.0001089	1
ACOT7	1.20861	0.004964	0.0001088	1
GPR162	1.13494	0.004968	0.0001095	1
DNASE2	1.20163	0.004986	0.0001103	1
AP1B1	1.20192	0.004989	0.0001102	1
LRRC6	1.19746	0.005007	0.0001115	1
CPD	1.21788	0.005009	0.0001111	1
IL32	1.1773	0.005011	0.0001114	1
PRDM4	1.22011	0.005075	0.0001132	1
MAP4K2	1.22324	0.005093	0.0001141	1
ANKRD57	1.17952	0.005138	0.0001156	1
P2RY5	1.18708	0.00514	0.0001154	1
IKBKG	1.2054	0.005154	0.0001162	1
IL15	1.20163	0.005176	0.0001169	1
PBEF1	1.14943	0.00522	0.0001184	1
CREB5	1.14903	0.005222	0.0001182	1
RAD21	1.12931	0.005264	0.0001198	1
RTN1	1.13792	0.005281	0.0001212	1
DUSP4	1.1805	0.005289	0.0001211	1
KPNA5	1.18259	0.00529	0.0001209	1
CAPN1	1.21021	0.00529	0.0001207	1
TCEAL2	1.21921	0.005302	0.0001219	1
SF3A3	1.21036	0.005344	0.0001231	1
HSPBAP1	1.21448	0.005392	0.0001244	1
LOC729030	1.19417	0.005473	0.0001268	1
UPP1	1.20584	0.005492	0.0001285	1
GSTM1	1.02743	0.005498	0.0001284	1
UBE2D3	1.20671	0.005506	0.0001283	1
CDKN2D	1.17994	0.005507	0.0001279	1
FAM76A	1.21359	0.005516	0.0001283	1
RAP2A	1.16713	0.005623	0.0001318	1
PEX6	1.09349	0.005674	0.0001332	1
EML2	1.18934	0.005677	0.0001336	1
MAPKAPK3	1.19133	0.005682	0.000134	1
PHACS	1.0304	0.005705	0.0001348	1
IGFBP3	1.18526	0.005827	0.0001382	1
IMPA2	1.15607	0.005828	0.0001379	1
IXL	1.21996	0.005896	0.0001401	1
KCNK12	1.21124	0.005917	0.0001411	1
GUSBL2	1.1946	0.005926	0.000141	1
LOC401233	1.0717	0.005927	0.0001427	1
SH2B1	1.17938	0.005929	0.000143	1
SIAHBP1	1.14574	0.005929	0.0001419	1
STOM	1.1956	0.005933	0.0001423	1
CCAR1	1.10181	0.005934	0.0001418	1
ANG	1.13353	0.006019	0.0001454	1
COX19	1.16537	0.006025	0.0001464	1
PIAS4	1.20221	0.006033	0.0001463	1
TPM1	1.07285	0.006037	0.0001461	1
ACSL1	1.16618	0.006137	0.0001494	1
SPARC	1.12045	0.006154	0.0001501	1
SLC25A19	1.18864	0.006154	0.0001504	1
PARP4	1.21625	0.006176	0.0001512	1
ITGB1	1.19646	0.006178	0.0001521	1
FAM32A	1.20685	0.00618	0.0001516	1
BAMBI	1.18779	0.006186	0.000152	1
TMEM16F	1.16455	0.006189	0.0001526	1
IL13RA1	1.1655	0.00621	0.0001534	1
RAB20	1.1334	0.006214	0.0001538	1
SHMT1	1.18469	0.006299	0.0001562	1
C6orf64	1.1976	0.006321	0.0001573	1
C9orf95	1.18078	0.006326	0.0001571	1
TUBA4A	1.17192	0.006441	0.0001606	1
KIAA1913	1.1909	0.006451	0.0001617	1
F2R	1.14732	0.006456	0.0001615	1
SASH1	1.1755	0.006467	0.0001615	1
HOMER2	1.13572	0.006575	0.0001651	1
TRAPPC3	1.20106	0.006584	0.0001659	1
PIK3R2	1.20729	0.006592	0.0001658	1
HIST1H2BH	1.09051	0.006667	0.0001683	1
GSDMDC1	1.20062	0.006734	0.0001703	1
NGFRAP1	1.15433	0.006792	0.0001721	1
NFIL3	1.16063	0.006797	0.0001725	1
TGFBR3	1.14732	0.00682	0.0001734	1
HADHA	1.20308	0.006824	0.0001738	1
IFT57	1.19346	0.006977	0.000178	1
CRISPLD2	1.10668	0.00699	0.0001787	1
PFKFB4	1.18217	0.00701	0.0001798	1
XAF1	1.10047	0.00702	0.0001797	1
TDG	1.17592	0.007185	0.0001846	1
S100A9	1.08542	0.007202	0.0001854	1
TAP1	1.19489	0.007358	0.0001897	1
DCLRE1A	1.18737	0.007398	0.0001914	1
IRAK2	1.20178	0.007403	0.0001919	1
ASNS	1.19175	0.007439	0.0001942	1
MPDU1	1.19218	0.007444	0.0001933	1
PIP5K2A	1.19904	0.007449	0.0001937	1
NR1H3	1.18737	0.007451	0.0001941	1
ATPAF1	1.20077	0.007527	0.0001971	1
RBM12B	1.17288	0.007576	0.0001988	1
ARIH2	1.20149	0.007608	0.0002	1
GRM2	1.20178	0.007681	0.0002022	1
TMEM111	1.1733	0.007735	0.000204	1
RAB6B	1.07285	0.007768	0.0002052	1
VAMP8	1.19689	0.007801	0.0002064	1
EMILIN2	1.17966	0.007804	0.0002068	1
ARL4A	1.17897	0.007926	0.0002104	1
ST3GAL3	1.18737	0.007938	0.0002111	1
MCOLN2	1.14051	0.007951	0.0002118	1
CCL4	1.09158	0.007956	0.0002123	1
PHF21A	1.19417	0.00798	0.0002133	1
ZNF223	1.12663	0.008012	0.0002145	1
ZBP1	1.16523	0.008056	0.0002161	1
GSK3B	1.19119	0.008066	0.0002171	1
KIF21A	1.18483	0.008066	0.0002167	1
TMEM30A	1.18652	0.008088	0.0002184	1
STYXL1	1.17689	0.008095	0.0002182	1
CCR4	1.17952	0.008118	0.0002196	1
CXorf38	1.07216	0.008123	0.0002204	1
PTGS2	1.02145	0.008205	0.0002234	1
SLAMF7	1.16306	0.008205	0.000223	1
ACSL5	1.20467	0.00822	0.0002242	1
NCLN	1.19531	0.008256	0.0002255	1
MGC29891	1.13084	0.008264	0.0002261	1
ZRANB1	1.18906	0.008273	0.0002267	1
FARSLB	1.11532	0.008371	0.0002298	1
ZNF777	1.19161	0.008502	0.0002338	1
MRPS16	1.19503	0.008533	0.0002358	1
DCLRE1C	1.1609	0.008547	0.0002358	1
PBX2	1.14194	0.008636	0.0002398	1
SH2D2A	1.1426	0.008645	0.0002408	1
IFI6	1.07689	0.008648	0.0002397	1
SLC10A3	1.18315	0.008722	0.0002438	1
C19orf33	1.06101	0.008735	0.0002437	1
SLC8A3	1.16877	0.008882	0.000249	1
VASP	1.1636	0.008927	0.0002507	1
TBL1X	1.1892	0.008969	0.0002523	1
FLJ39531	1.1636	0.009016	0.0002544	1
MRPL17	1.17343	0.009021	0.0002541	1
C3orf21	1.18638	0.009097	0.0002571	1
ZDHHC20	1.14456	0.009099	0.0002576	1
HIST1H2BK	1.14639	0.009322	0.0002643	1
NLRP3	1.1534	0.00951	0.0002705	1
PAPD1	1.15875	0.009562	0.0002728	1
UBE2J1	1.16727	0.009577	0.0002737	1
CARHSP1	1.1936	0.009635	0.0002762	1
PRDX6	1.1711	0.009637	0.0002759	1
MT2A	1.13302	0.009659	0.0002774	1
RNASE2	1.06496	0.009676	0.0002783	1
STARD8	1.18526	0.009848	0.0002837	1
GMPR	1.15101	0.009857	0.0002844	1
NCAPD2	1.17786	0.009874	0.0002857	1
TNFAIP3	1.06758	0.009886	0.0002856	1
TSHZ3	1.17426	0.009956	0.0002886	1
C17orf56	1.17786	0.0101	0.0002932	1
C20orf27	1.15996	0.01017	0.0002956	1
HEXDC	1.13817	0.01026	0.0002989	1
JSRP1	1.1936	0.01028	0.0003004	1
IL8RB	1.13071	0.01029	0.0003	1
DGCR6L	1.15062	0.0103	0.0003012	1
TMEM127	1.1773	0.01037	0.0003042	1
CYLD	1.1605	0.01041	0.0003061	1
ERN1	1.17014	0.01043	0.000307	1
PRDM1	1.13546	0.01044	0.0003079	1
TOM1L2	1.19246	0.01046	0.0003088	1
POLE	1.19689	0.01046	0.0003098	1
CDS2	1.18568	0.01047	0.0003106	1
SH3GL1	1.18329	0.01047	0.0003096	1
C6orf204	1.05519	0.01047	0.0003112	1
RAB1A	1.18413	0.01056	0.0003143	1
BTK	1.12625	0.01063	0.0003167	1
SLC9A1	1.19062	0.01066	0.0003201	1
LRP5L	1.13507	0.01067	0.0003199	1
DYNLL2	1.15741	0.01067	0.0003195	1
STXBP5	1.1812	0.01068	0.0003192	1
ZNF652	1.10339	0.01069	0.0003191	1
SDC4	1.16564	0.01073	0.000323	1
CD163	1.11508	0.01074	0.0003229	1
BSCL2	1.17675	0.01109	0.0003355	1
RNF19	1.1566	0.01116	0.0003387	1
2006-03-01	1.17041	0.01117	0.0003383	1
HELB	1.10169	0.01118	0.0003403	1
DNM3	1.09493	0.01119	0.00034	1
MEF2D	1.18723	0.01119	0.0003411	1
FBXL5	1.17994	0.01121	0.000342	1
CYP1B1	1.06576	0.01121	0.0003431	1
LIN54	1.17883	0.01134	0.0003476	1
ATP6V1E1	1.17	0.01136	0.0003487	1
RUNDC2B	1.13314	0.01137	0.0003496	1
BLVRA	1.1029	0.01147	0.0003532	1
KIAA1618	1.12918	0.01154	0.0003562	1
ITGAD	1.15634	0.01154	0.0003557	1
TXNDC3	1.14679	0.01163	0.0003638	1
C1orf198	1.1325	0.01163	0.0003633	1
PLXDC2	1.16333	0.01164	0.0003632	1
RNASE6	1.08225	0.01165	0.0003603	1
C1orf19	1.1773	0.01166	0.0003617	1
C6orf150	1.11408	0.01166	0.0003632	1
AMFR	1.14758	0.01166	0.000362	1
HOMER3	1.18245	0.01167	0.0003613	1
MTP18	1.16741	0.01182	0.0003704	1
LOC88523	1.19175	0.01186	0.000372	1
TTC16	1.13779	0.01195	0.0003761	1
STX1A	1.18948	0.01197	0.000376	1
TNF	1.11408	0.01232	0.0003881	1
FN3KRP	1.19246	0.01244	0.0003926	1
ZNF365	1.13186	0.01246	0.0003939	1
CMTM4	1.18483	0.01277	0.0004046	1
RGS10	1.19403	0.01286	0.0004082	1
CD300C	1.06712	0.01287	0.0004094	1
SLC35D2	1.17206	0.01296	0.0004148	1
VAV3	1.17647	0.01299	0.0004164	1
PIK3R1	1.18133	0.013	0.0004148	1
POU2F2	1.17096	0.01301	0.0004147	1
C9orf114	1.17619	0.01305	0.0004188	1
NRG1	1.15741	0.01317	0.0004232	1
TJP2	1.17606	0.01317	0.0004237	1
TXNRD2	1.19275	0.01326	0.0004273	1
SLCO3A1	1.18835	0.01335	0.000431	1
SQSTM1	1.0929	0.01341	0.0004333	1
AFAP1L2	1.15447	0.01345	0.0004352	1
C5orf15	1.18666	0.01346	0.0004362	1
MRPL43	1.13636	0.01349	0.000438	1
PPP2R3A	1.10558	0.01354	0.0004399	1
GALNAC4S-6ST	1.15647	0.01371	0.0004461	1
FAM129A	1.14587	0.01383	0.0004506	1
ACRBP	1.0644	0.01386	0.0004537	1
MST150	1.17938	0.01388	0.0004535	1
CD160	1.0618	0.01389	0.0004535	1
KRT73	1.03972	0.01395	0.0004571	1
C9orf37	1.1812	0.01397	0.0004584	1
C16orf61	1.20802	0.01398	0.0004601	1
RPL27A	1.04351	0.01399	0.0004597	1
FIBP	1.13908	0.01408	0.0004646	1
KLF6	1.12625	0.01409	0.0004644	1
VEZF1	1.16036	0.01418	0.0004692	1
KBTBD11	1.1558	0.01419	0.0004688	1
SLC43A2	1.14784	0.01424	0.0004718	1
C17orf61	1.18666	0.01433	0.0004762	1
SIGLEC10	1.09325	0.01437	0.0004779	1
RNF10	1.15527	0.0144	0.0004797	1
SPTBN1	1.08637	0.01468	0.0004896	1
CYBB	1.14824	0.01469	0.0004906	1
SMARCD2	1.17509	0.01487	0.0004986	1
CACNA2D2	1.1655	0.01488	0.0004985	1
CDK9	1.17082	0.01489	0.0004981	1
KIF1B	1.17123	0.01494	0.0005018	1
HTATIP2	1.19019	0.01525	0.0005135	1
CCS	1.17883	0.0154	0.0005208	1
EMD	1.17495	0.01542	0.0005208	1
MYLK	1.08436	0.01543	0.0005223	1
TRIM58	1.12499	0.01544	0.0005205	1
STAT1	1.15754	0.01545	0.0005236	1
BHLHB2	1.16212	0.01568	0.0005321	1
KIAA1875	1.14811	0.01578	0.0005364	1
EHD1	1.16645	0.01585	0.0005395	1
SNX15	1.17702	0.01595	0.000545	1
DRD3	1.13392	0.01596	0.000544	1
FHL2	1.11919	0.01597	0.000545	1
ALDOC	1.12931	0.016	0.0005473	1
CNTNAP1	1.15714	0.01601	0.0005508	1
XAB1	1.14534	0.01603	0.0005505	1
TMEM11	1.16986	0.01603	0.0005491	1
LASP1	1.18835	0.01605	0.0005505	1
ZNF101	1.09806	0.01606	0.0005529	1
IPP	1.06952	0.0161	0.0005561	1
ENPP4	1.13921	0.01611	0.0005555	1
ABL1	1.153	0.01617	0.000559	1
TMOD1	1.17412	0.01617	0.0005599	1
E4F1	1.18203	0.01627	0.0005641	1
GFOD1	1.16768	0.01641	0.0005697	1
SGK	1.08944	0.01648	0.0005727	1
PTCRA	1.16932	0.01687	0.0005871	1
C3orf40	1.18864	0.01692	0.0005897	1
PERLD1	1.17426	0.01701	0.0005934	1
LRRC41	1.16713	0.01707	0.0005965	1
ZNF593	1.16117	0.0171	0.0005989	1
KLF11	1.16822	0.0172	0.0006032	1
CSDA	1.15942	0.01725	0.0006064	1
C3AR1	1.15607	0.01727	0.0006064	1
SLC44A1	1.18652	0.01731	0.0006093	1
LRIG2	1.14653	0.01734	0.0006121	1
FECH	1.15982	0.01734	0.0006128	1
RABGGTA	1.17192	0.01736	0.0006118	1
H3F3B	1.10156	0.01742	0.0006165	1
HERC5	1.08707	0.01743	0.0006174	1
DACT1	1.07724	0.01744	0.0006189	1
DGCR6	1.1236	0.01749	0.0006212	1
CPT1A	1.17357	0.01758	0.0006275	1
BAG3	1.1489	0.01759	0.0006272	1
IDS	1.18175	0.0176	0.0006267	1
IER3	1.02796	0.01761	0.0006264	1
SPIRE1	1.18906	0.01776	0.0006349	1
TOMM34	1.16891	0.01778	0.0006371	1
ZNF653	1.167	0.0178	0.0006371	1
OLFM1	1.09373	0.01789	0.0006428	1
CPEB4	1.13779	0.0179	0.000644	1
TOX	1.18963	0.01803	0.0006493	1
C17orf79	1.19062	0.01809	0.0006533	1
FRS3	1.17069	0.0181	0.0006526	1
UROS	1.17178	0.0183	0.0006615	1
MYO5A	1.17813	0.01842	0.0006666	1
GFRA2	1.1534	0.01847	0.0006693	1
FLJ39822	1.15274	0.01857	0.0006738	1
TIPARP	1.16973	0.01858	0.000676	1
DNAJB9	1.1383	0.0186	0.0006756	1
ALOX12	1.01978	0.01884	0.0006872	1
DOCK2	1.15902	0.01887	0.0006871	1
PCBP2	1.16009	0.0189	0.00069	1
MGC4093	1.16442	0.01903	0.0006958	1
C10orf35	1.16482	0.01905	0.0006982	1
PLEKHO1	1.18273	0.01906	0.0006995	1
CPVL	1.05186	0.01907	0.0006979	1
MRPL1	1.15101	0.01917	0.0007044	1
C1orf112	1.1892	0.01938	0.0007139	1
M6PR	1.13895	0.01939	0.0007132	1
N4BP2	1.1162	0.01955	0.0007209	1
DHRS13	1.16537	0.01955	0.0007227	1
RNASET2	1.17151	0.01956	0.0007223	1
ZSWIM1	1.16727	0.01967	0.0007281	1
NFKBIZ	1.12435	0.01997	0.000741	1
THOC5	1.16932	0.02009	0.0007462	1
HMHA1	1.15234	0.0201	0.0007475	1
RAB10	1.16482	0.02013	0.0007496	1
NEXN	1.1197	0.02014	0.0007518	1
H2AFJ	1.1546	0.02016	0.0007533	1
HRASLS	1.08613	0.02017	0.0007518	1
CYP27A1	1.10205	0.02032	0.0007632	1
CUEDC1	1.15154	0.02032	0.0007639	1
C10orf28	1.15567	0.02035	0.0007614	1
EIF2B5	1.14943	0.02035	0.0007631	1
COL18A1	1.08684	0.02036	0.0007626	1
RAB11A	1.14969	0.02057	0.0007744	1
CENPB	1.17509	0.02076	0.0007823	1
WIPF1	1.11396	0.02082	0.0007855	1
AP1S2	1.11383	0.02135	0.0008066	1
GLA	1.16387	0.02139	0.0008089	1
IFNG	1.12841	0.02151	0.0008154	1
APP	1.14207	0.02151	0.0008147	1
MRPS18A	1.16347	0.02164	0.0008215	1
ITCH	1.12841	0.0217	0.0008255	1
PPP4C	1.18343	0.02171	0.0008249	1
TMEM40	1.14943	0.02174	0.000828	1
ZNF659	1.14837	0.02186	0.0008336	1
SCAP	1.18963	0.02216	0.0008462	1
MTMR11	1.13289	0.02224	0.0008503	1
ASGR2	1.10951	0.02248	0.0008602	1
NMT1	1.14377	0.0225	0.0008623	1
C3orf59	1.17	0.02253	0.0008643	1
PARN	1.17151	0.02293	0.0008807	1
PBLD	1.1029	0.02357	0.0009062	1
HIST1H2AE	1.07852	0.02369	0.0009141	1
CADM1	1.15794	0.0237	0.0009136	1
C11orf75	1.11086	0.02372	0.0009131	1
GP1BA	1.15794	0.02377	0.0009215	1
IFT122	1.1711	0.02378	0.0009198	1
GADD45B	1.14482	0.02379	0.0009192	1
C5	1.15607	0.0238	0.0009215	1
CDC7	1.15567	0.02425	0.0009414	1
SPRED1	1.13753	0.0245	0.000953	1
HIPK2	1.13033	0.02453	0.0009577	1
TARBP2	1.17261	0.02454	0.0009556	1
PALLD	1.15848	0.02454	0.0009568	1
FER1L3	1.09697	0.02463	0.0009625	1
SLC35D3	1.15875	0.02475	0.0009684	1
SFMBT2	1.10011	0.02479	0.000971	1
C10orf47	1.15794	0.0251	0.0009867	1
B4GALT7	1.17233	0.02511	0.0009858	1
C1orf144	1.15955	0.02512	0.000985	1
LEPROT	1.11932	0.02519	0.0009923	1
TSPAN17	1.16158	0.0252	0.0009916	1
TELO2	1.16645	0.02536	0.001	1
ING4	1.15875	0.02538	0.001002	1
SKAP1	1.16618	0.02553	0.001009	1
SUOX	1.16252	0.02565	0.001015	1
LRRC23	1.13482	0.02565	0.001017	1
LMNA	1.15861	0.02571	0.00102	1
TPD52L2	1.16932	0.02577	0.001025	1
MPPE1	1.14771	0.02579	0.001024	1
FOXO3A	1.16932	0.02599	0.001035	1
MAP6D1	1.16713	0.02619	0.001045	1
FCRLA	1.01812	0.02659	0.001062	1
VEZT	1.16604	0.02673	0.001069	1
C19orf53	1.16293	0.02688	0.001076	1
GUCY1A3	1.02512	0.0273	0.001094	1
RNF138	1.08483	0.02738	0.001101	1
AMD1	1.08342	0.02738	0.0011	1
DIS3L	1.16414	0.0274	0.001099	1
EIF3S10	1.14351	0.02761	0.001111	1
MBP	1.16632	0.02762	0.001114	1
EIF5	1.15875	0.02765	0.001114	1
GBP5	1.1207	0.02788	0.001126	1
KLF4	1.05296	0.02791	0.001129	1
ELP3	1.17385	0.02798	0.001133	1
C10orf97	1.17385	0.02808	0.001138	1
AZI1	1.16645	0.02809	0.00114	1
SETDB2	1.18036	0.0284	0.001154	1
ADAM19	1.09878	0.02855	0.001162	1
LOC642197	1.16387	0.02857	0.001162	1
NCKAP1L	1.15207	0.02859	0.001165	1
ULK1	1.13882	0.02879	0.001175	1
DUS2L	1.15687	0.0289	0.00118	1
ZEB2	1.13122	0.02899	0.001185	1
TRPV4	1.16564	0.02914	0.001194	1
ISG20L1	1.16023	0.02914	0.001193	1
NELF	1.09481	0.02919	0.001197	1
UCP3	1.16932	0.02927	0.001202	1
NFKBIA	1.14443	0.02944	0.001212	1
C22orf34	1.03498	0.02945	0.001211	1
NNT	1.12486	0.02947	0.001214	1
C19orf56	1.15888	0.02949	0.001218	1
CASZ1	1.14077	0.0296	0.001223	1
ZMYND15	1.12208	0.02983	0.001234	1
SSH3	1.16877	0.02988	0.001238	1
TMEM165	1.16509	0.0299	0.00124	1
LRRFIP2	1.1722	0.02992	0.001244	1
TSSC4	1.15875	0.02993	0.001245	1
RAB11FIP3	1.15982	0.02995	0.001243	1
RECQL	1.15727	0.02995	0.001247	1
HIST1H2BE	1.11062	0.02996	0.001249	1
UBE2L3	1.12448	0.03002	0.001253	1
ITPR3	1.14247	0.03017	0.001261	1
TMED3	1.17398	0.03036	0.00127	1
SCGB1C1	1.06406	0.0304	0.001273	1
CORO1C	1.12994	0.03065	0.001285	1
KRT1	1.11445	0.03079	0.001292	1
PTK2	1.16104	0.0308	0.001294	1
GPX1	1.09016	0.03094	0.001304	1
NUCKS1	1.13109	0.03096	0.001302	1
ANGEL2	1.16212	0.03096	0.001304	1
NCKIPSD	1.16225	0.03106	0.001311	1
GPR137B	1.14456	0.03116	0.001321	1
CAPN2	1.15487	0.03116	0.001316	1
ATG7	1.15915	0.03116	0.001318	1
CD52	1.15794	0.03117	0.001319	1
LOC153561	1.06022	0.03122	0.001324	1
DUSP23	1.15754	0.03128	0.001331	1
CDK2AP1	1.13804	0.03129	0.00133	1
INSIG1	1.14403	0.03131	0.00133	1
PICALM	1.1236	0.03138	0.001337	1
TMEM93	1.16959	0.03142	0.00134	1
ZNF644	1.15128	0.03154	0.001348	1
PFAAP5	1.11346	0.03171	0.001361	1
TREM1	1.14548	0.03171	0.00136	1
MTMR14	1.17343	0.03174	0.001358	1
FBN2	1.04778	0.03174	0.001359	1
GADD45A	1.12246	0.03183	0.00137	1
ATP6AP1	1.1632	0.03185	0.00137	1
MGC72104	1.11532	0.03186	0.001369	1
LILRA2	1.05452	0.03203	0.00138	1
CPNE8	1.14286	0.03241	0.001398	1
YPEL2	1.16604	0.03277	0.001418	1
HBS1L	1.09087	0.03281	0.001421	1
FLJ22662	1.02501	0.03289	0.001426	1
RIPK1	1.16279	0.03291	0.001429	1
NDUFA7	1.15327	0.03302	0.001436	1
NR2C2	1.12752	0.03311	0.001443	1
HACL1	1.1733	0.03321	0.001449	1
ORAOV1	1.1489	0.0333	0.001455	1
TNFRSF14	1.16768	0.03337	0.001459	1
SSBP2	1.15594	0.03337	0.001461	1
MAP4	1.16795	0.03342	0.001464	1
OAS2	1.11161	0.03343	0.001468	1
ADRB2	1.08921	0.03344	0.001467	1
ZNF358	1.15848	0.03358	0.001479	1
PLEKHG3	1.09782	0.03359	0.001478	1
PHCA	1.14233	0.03444	0.00152	1
FAM104B	1.14626	0.03453	0.001525	1
MSH3	1.13263	0.03457	0.001529	1
SLC12A9	1.14247	0.03476	0.001542	1
TP53I3	1.15287	0.03479	0.001542	1
CSNK1G1	1.1489	0.03487	0.00155	1
NAPB	1.16496	0.03488	0.001552	1
IFNGR1	1.14732	0.03489	0.001549	1
TAX1BP3	1.11297	0.03517	0.001568	1
UBE2G1	1.14312	0.03521	0.001571	1
PPWD1	1.14574	0.03529	0.001577	1
RPA2	1.13225	0.03553	0.001589	1
TYK2	1.15701	0.03588	0.001606	1
AP1S1	1.15969	0.03605	0.001615	1
WWOX	1.11433	0.03609	0.001619	1
RNASE4	1.09769	0.03655	0.001641	1
PTPRM	1.11919	0.03658	0.001644	1
APH1A	1.12727	0.03697	0.001665	1
COQ10B	1.13494	0.03725	0.001681	1
SLC11A2	1.13161	0.03725	0.001686	1
ZNF289	1.14561	0.03725	0.001684	1
FLJ38717	1.10132	0.03725	0.001679	1
RAE1	1.1409	0.03726	0.001683	1
CLEC2B	1.03864	0.03775	0.00171	1
SNRPB	1.13623	0.038	0.001725	1
MZF1	1.13753	0.03802	0.001724	1
USP36	1.10767	0.03816	0.001734	1
GLIPR1	1.04037	0.03817	0.001738	1
AYTL2	1.14456	0.0382	0.001738	1
MYL6	1.16185	0.03838	0.001749	1
PLEKHF1	1.0644	0.03856	0.001759	1
LOC100008589	1.09206	0.03878	0.001771	1
TYW3	1.11882	0.03897	0.001781	1
ALKBH3	1.15035	0.039	0.001788	1
MBD6	1.11421	0.03901	0.001787	1
TLR2	1.15687	0.03903	0.001786	1
GPHN	1.17467	0.03933	0.001805	1
TMEM2	1.1334	0.03944	0.001812	1
RPS6KA1	1.153	0.03961	0.001821	1
FDXR	1.16414	0.03966	0.001825	1
PSRC1	1.14758	0.03973	0.00183	1
YWHAH	1.14051	0.03994	0.001844	1
RRN3	1.15821	0.04005	0.001856	1
ZBTB16	1.06724	0.04009	0.001856	1
ST8SIA1	1.16212	0.04012	0.001854	1
MTHFD2	1.13033	0.04012	0.001855	1
PCAF	1.1439	0.04015	0.001862	1
SNX26	1.11782	0.04019	0.001866	1
CCDC25	1.15154	0.04032	0.001874	1
ALS2CR2	1.17509	0.04032	0.001879	1
UBE1L	1.15567	0.04034	0.001878	1
HIST1H1D	1.17911	0.04034	0.001877	1
FAM46A	1.14273	0.04082	0.001904	1
MMP9	1.07689	0.04132	0.001933	1
RP9	1.13135	0.04134	0.001932	1
FAM79A	1.15727	0.04162	0.001953	1
2001-05-01	1.10595	0.04193	0.001971	1
SPHAR	1.1279	0.04194	0.00197	1
APOBEC3H	1.10558	0.04242	0.001996	1
ZNF668	1.17096	0.0429	0.002021	1
DERA	1.16171	0.04311	0.002037	1
CENTD3	1.12246	0.0433	0.002053	1
HSBP1	1.1526	0.04332	0.002052	1
C9orf72	1.13071	0.04334	0.002049	1
ALDH2	1.0853	0.04357	0.002068	1
ZDHHC13	1.15287	0.04364	0.002074	1
KLF9	1.11732	0.04365	0.00208	1
SNX27	1.13327	0.04365	0.002078	1
SNAPC4	1.14613	0.04366	0.002077	1
AMT	1.13097	0.04393	0.002095	1
C3orf10	1.12133	0.044	0.0021	1
HMGCS1	1.1609	0.04415	0.002116	1
COX15	1.11894	0.04416	0.00211	1
ITSN1	1.12918	0.04417	0.002115	1
ALS2CR14	1.08155	0.04423	0.002121	1
EPB49	1.06	0.0443	0.002127	1
POLG	1.15607	0.04433	0.00213	1
BCKDK	1.14732	0.04452	0.002141	1
RPA1	1.09529	0.04452	0.002144	1
LRSAM1	1.14416	0.04466	0.002152	1
MRPL22	1.16198	0.04491	0.002166	1
SLC31A2	1.05175	0.04494	0.002171	1
CTBS	1.1566	0.04527	0.00219	1
LEPREL2	1.13186	0.0454	0.002198	1
HPCAL1	1.14995	0.04556	0.002208	1
LY6G5C	1.12309	0.04571	0.002223	1
LY6G6D	1.16973	0.04573	0.002218	1
PAXIP1	1.16795	0.04575	0.002223	1
CSTA	1.12095	0.04579	0.002223	1
NAT5	1.16442	0.04594	0.002236	1
FLJ11286	1.14863	0.04649	0.002265	1
TTC13	1.14286	0.04664	0.002277	1
CSNK2A1	1.14012	0.04671	0.002283	1
RUTBC1	1.12651	0.04712	0.002304	1
C1orf26	1.15781	0.0472	0.002311	1
ABCC4	1.09878	0.04729	0.002317	1
PRKAR1A	1.09039	0.04769	0.002339	1
BRD2	1.14064	0.04778	0.002346	1
ARHGAP18	1.11037	0.04805	0.002361	1
CHST12	1.12309	0.04807	0.002364	1
C11orf79	1.15781	0.04813	0.002373	1
UBAP2	1.16171	0.04814	0.002372	1
PRTFDC1	1.15234	0.04816	0.002371	1
CMIP	1.1485	0.04822	0.00238	1
UGCGL1	1.06826	0.04831	0.002391	1
TMED1	1.13753	0.04833	0.002395	1
GPR92	1.10693	0.04833	0.002388	1
MT1A	1.10595	0.04836	0.002398	1
SNX10	1.1236	0.0484	0.002402	1
HTR3B	1.00644	0.04872	0.00242	1
GLB1L	1.1605	0.04896	0.002434	1
LMBRD1	1.08073	0.04923	0.00245	1
PIGU	1.14325	0.0495	0.002466	1
PCSK6	1.14692	0.04952	0.002469	1
LRRC45	1.12689	0.04982	0.002493	1
ZAK	1.16212	0.04984	0.002496	1
WDR79	1.15701	0.04985	0.002492	1
SYT15	1.12994	0.04989	0.002492	1
LRRN3	0.609013	9.07e-12	4.09e-16	-1
UCP2	0.613874	2.22e-11	2e-15	-1
CXCR4	0.704722	7.74e-11	1.05e-14	-1
ATHL1	0.642674	8.89e-11	1.6e-14	-1
IGJ	0.682128	1.64e-09	4.44e-13	-1
ACTG1	0.716846	1.81e-09	4.08e-13	-1
MYOM2	0.925926	2.99e-09	1.21e-12	-1
ARHGEF1	0.665779	3.01e-09	1.09e-12	-1
IL7R	0.654022	3.2e-09	1.01e-12	-1
RPL10A	0.665336	9.84e-09	4.44e-12	-1
ACTB	0.713776	2.33e-08	1.16e-11	-1
NCF1	0.68306	4.99e-08	2.93e-11	-1
PARP10	0.69735	6.36e-08	4.01e-11	-1
SMARCC2	0.670241	9.1e-08	6.15e-11	-1
FAM100A	0.674764	1.14e-07	9.28e-11	-1
MGRN1	0.684932	1.16e-07	8.85e-11	-1
IDUA	0.682128	1.18e-07	8.49e-11	-1
NLRC5	0.745712	1.48e-07	1.27e-10	-1
CD74	0.689655	1.58e-07	1.42e-10	-1
RPLP0	0.724113	2.29e-07	2.17e-10	-1
ZNF679	0.752445	2.38e-07	2.36e-10	-1
CDK5RAP3	0.77821	2.39e-07	2.48e-10	-1
LTBP3	0.700771	2.53e-07	2.74e-10	-1
FKSG30	0.707714	2.64e-07	2.98e-10	-1
CD79B	0.725163	2.74e-07	3.21e-10	-1
EIF1AY	0.988142	3.14e-07	3.83e-10	-1
PRR5	0.702247	3.67e-07	4.64e-10	-1
CD248	0.723589	3.79e-07	4.95e-10	-1
KRT72	0.802568	4.51e-07	6.11e-10	-1
NPIP	0.734754	5.25e-07	7.57e-10	-1
SYTL1	0.709723	6.03e-07	8.97e-10	-1
TPM2	0.727802	7.5e-07	1.15e-09	-1
CD3E	0.711744	8.8e-07	1.39e-09	-1
ALDOA	0.758725	8.93e-07	1.45e-09	-1
NUAK2	0.710227	9.34e-07	1.56e-09	-1
CD37	0.708717	9.67e-07	1.66e-09	-1
D4S234E	0.774593	1.62e-06	2.92e-09	-1
JAK1	0.776398	1.84e-06	3.4e-09	-1
HIST1H2AC	0.859107	2.24e-06	4.25e-09	-1
LENG8	0.698324	2.48e-06	4.8e-09	-1
CCDC95	0.727273	2.77e-06	5.49e-09	-1
EEF1B2	0.784929	2.98e-06	6.05e-09	-1
CD79A	0.738552	3.1e-06	6.7e-09	-1
CSF3R	0.743494	3.14e-06	6.65e-09	-1
BSG	0.751315	3.31e-06	7.32e-09	-1
EDG6	0.728332	3.85e-06	8.67e-09	-1
IFI44L	0.784929	5.02e-06	1.15e-08	-1
LRAP	0.883392	5.04e-06	1.18e-08	-1
SMA4	0.796178	5.28e-06	1.31e-08	-1
LY6E	0.744048	5.3e-06	1.29e-08	-1
SLC25A22	0.735294	5.31e-06	1.36e-08	-1
HLA-C	0.816993	5.38e-06	1.36e-08	-1
KCTD13	0.730994	5.39e-06	1.29e-08	-1
GRINA	0.727802	5.89e-06	1.54e-08	-1
TSPYL2	0.770416	6.83e-06	1.82e-08	-1
ITM2C	0.733138	7.38e-06	2e-08	-1
FOS	0.896057	8.06e-06	2.22e-08	-1
ZNF91	0.809717	8.67e-06	2.42e-08	-1
ARRDC1	0.726744	8.9e-06	2.53e-08	-1
LEF1	0.746269	8.93e-06	2.62e-08	-1
HSPD1	0.773395	9.06e-06	2.61e-08	-1
LRRFIP1	0.921659	9.36e-06	2.83e-08	-1
C21orf66	0.751315	9.37e-06	2.79e-08	-1
DKFZP434A0131	0.773994	1.05e-05	3.27e-08	-1
MID1IP1	0.750188	1.06e-05	3.24e-08	-1
CD8A	0.793021	1.07e-05	3.38e-08	-1
NUP43	0.86881	1.07e-05	3.44e-08	-1
C19orf6	0.759301	1.3e-05	4.22e-08	-1
PLEC1	0.745156	1.44e-05	4.85e-08	-1
ECGF1	0.774593	1.48e-05	5.06e-08	-1
CCR7	0.753012	1.48e-05	5.21e-08	-1
JOSD2	0.737463	1.5e-05	5.36e-08	-1
NSUN5C	0.782473	2.13e-05	7.69e-08	-1
GZMM	0.765697	2.17e-05	8.13e-08	-1
CHURC1	0.796813	2.19e-05	7.98e-08	-1
MAPK8IP3	0.765111	2.49e-05	9.43e-08	-1
FGD2	0.779423	3.13e-05	1.2e-07	-1
LOC400986	0.967118	3.19e-05	1.25e-07	-1
SNRPN	0.788644	3.19e-05	1.24e-07	-1
TXK	0.772798	3.24e-05	1.3e-07	-1
TBC1D17	0.746826	3.26e-05	1.29e-07	-1
PHF1	0.761035	3.3e-05	1.34e-07	-1
G6PD	0.754148	3.57e-05	1.48e-07	-1
GATAD2B	0.755858	3.59e-05	1.5e-07	-1
AP1G2	0.75188	3.72e-05	1.59e-07	-1
HLA-DRB4	0.853242	3.94e-05	1.7e-07	-1
ABCA7	0.798722	4.16e-05	1.82e-07	-1
KIR2DL1	0.966184	4.18e-05	1.86e-07	-1
TMEM63A	0.761035	4.2e-05	1.85e-07	-1
NOSIP	0.772798	5.12e-05	2.31e-07	-1
IL27RA	0.769231	5.14e-05	2.36e-07	-1
NARG1L	0.769231	5.19e-05	2.36e-07	-1
SH3BP1	0.773395	5.31e-05	2.46e-07	-1
DC2	0.795545	5.37e-05	2.52e-07	-1
CCM2	0.859845	5.5e-05	2.6e-07	-1
GPAA1	0.760456	5.53e-05	2.64e-07	-1
PLCB2	0.789889	5.54e-05	2.7e-07	-1
TMEM16J	0.789889	5.57e-05	2.69e-07	-1
CTDSP1	0.750188	5.71e-05	2.8e-07	-1
AHDC1	0.75815	6.06e-05	3e-07	-1
GUSBL1	0.815661	6.5e-05	3.31e-07	-1
NRGN	0.848896	6.5e-05	3.28e-07	-1
NELL2	0.791139	6.74e-05	3.46e-07	-1
NLRP2	0.844595	7.1e-05	3.68e-07	-1
EDG1	0.799361	7.33e-05	3.83e-07	-1
LOC728734	0.784929	7.49e-05	3.99e-07	-1
DYRK2	0.78064	7.97e-05	4.35e-07	-1
FAM101B	0.757002	7.99e-05	4.32e-07	-1
LOC442535	0.81367	8.05e-05	4.32e-07	-1
OSBPL7	0.766871	8.08e-05	4.44e-07	-1
ID3	0.809061	8.13e-05	4.62e-07	-1
ABCA2	0.781861	8.13e-05	4.51e-07	-1
ARS2	0.770416	8.17e-05	4.57e-07	-1
BLK	0.794913	8.18e-05	4.61e-07	-1
ABLIM1	0.777001	8.2e-05	4.7e-07	-1
DUSP6	0.839631	8.66e-05	5.04e-07	-1
ARHGAP30	0.803213	9.22e-05	5.4e-07	-1
RPS23	0.821693	9.4e-05	5.55e-07	-1
CLK1	0.793651	9.47e-05	5.63e-07	-1
ROBO3	0.776398	9.48e-05	5.69e-07	-1
PFN1	0.763942	9.82e-05	5.93e-07	-1
TNRC6A	0.768049	0.000102	6.21e-07	-1
SF3A2	0.783085	0.0001058	6.49e-07	-1
MIB2	0.762195	0.0001149	7.1e-07	-1
STAB1	0.848176	0.0001184	7.47e-07	-1
FAM63A	0.923361	0.0001185	7.42e-07	-1
CCT6A	0.830565	0.0001187	7.38e-07	-1
OXNAD1	0.784314	0.0001205	7.66e-07	-1
ILF3	0.815661	0.0001214	7.77e-07	-1
MLL3	0.819672	0.0001238	8.03e-07	-1
ATM	0.788022	0.0001245	8.03e-07	-1
STX5A	0.762195	0.0001249	8.17e-07	-1
CORO7	0.766284	0.0001251	8.29e-07	-1
PLAC8	0.766871	0.0001255	8.26e-07	-1
RBM26	0.802568	0.0001333	8.89e-07	-1
GIMAP2	0.783085	0.0001417	9.52e-07	-1
MAN2C1	0.816993	0.0001451	9.87e-07	-1
AEBP1	0.770416	0.0001455	9.97e-07	-1
CCT7	0.823723	0.000147	1.02e-06	-1
LMOD3	0.928505	0.0001475	1.02e-06	-1
SLC16A3	0.8285	0.0001496	1.05e-06	-1
MS4A1	0.812348	0.0001587	1.12e-06	-1
CLPTM1	0.780031	0.0001596	1.12e-06	-1
DBP	0.770416	0.0001606	1.14e-06	-1
ABCD1	0.769231	0.0001686	1.22e-06	-1
OPN3	0.790514	0.0001752	1.27e-06	-1
MGC33556	0.786782	0.0001755	1.28e-06	-1
FLNA	0.796178	0.000183	1.35e-06	-1
LGALS3	0.812348	0.0001838	1.36e-06	-1
ZNF580	0.787402	0.0001855	1.39e-06	-1
BTF3	0.798722	0.0001864	1.39e-06	-1
PSMB8	0.810373	0.0001939	1.46e-06	-1
LYZ	0.887311	0.0001944	1.47e-06	-1
NUCB2	0.790514	0.0001945	1.48e-06	-1
PLCXD1	0.798722	0.0001969	1.51e-06	-1
AES	0.781861	0.0002083	1.61e-06	-1
CXXC5	0.786782	0.0002259	1.75e-06	-1
JUP	0.854701	0.0002275	1.79e-06	-1
CCDC88	0.794281	0.0002276	1.78e-06	-1
Sep-06	0.806452	0.000233	1.84e-06	-1
TSPAN3	0.803859	0.0002345	1.87e-06	-1
DGKA	0.789889	0.0002348	1.86e-06	-1
NFIC	0.929368	0.0002429	1.95e-06	-1
CENTB5	0.772798	0.0002614	2.11e-06	-1
RPS4X	0.803859	0.0002799	2.27e-06	-1
GPR18	0.824402	0.0002896	2.38e-06	-1
GPSN2	0.786782	0.0002911	2.38e-06	-1
FAIM3	0.789889	0.0003121	2.58e-06	-1
C22orf16	0.769231	0.0003191	2.65e-06	-1
TRIM28	0.78125	0.0003235	2.7e-06	-1
NME2	0.791766	0.0003236	2.73e-06	-1
ANPEP	0.877193	0.0003237	2.71e-06	-1
SNUPN	0.784929	0.000328	2.78e-06	-1
EI24	0.782473	0.0003355	2.86e-06	-1
NDUFB3	0.805802	0.0003464	2.98e-06	-1
HSPA1B	0.882613	0.0003485	3.02e-06	-1
TMEM176A	0.954198	0.0003525	3.07e-06	-1
MBD2	0.784314	0.0003609	3.19e-06	-1
MLF2	0.786782	0.0003627	3.19e-06	-1
TAGLN2	0.848896	0.0003628	3.17e-06	-1
POLM	0.778816	0.0003655	3.25e-06	-1
BCL9L	0.785546	0.000374	3.34e-06	-1
ATP5F1	0.809717	0.0003754	3.37e-06	-1
TES	0.81103	0.0003774	3.42e-06	-1
TDRD1	0.91659	0.0003787	3.41e-06	-1
CLIC3	0.843882	0.0003907	3.56e-06	-1
CD19	0.85034	0.0003971	3.63e-06	-1
POLR2E	0.795545	0.0004028	3.7e-06	-1
C12orf57	0.798085	0.0004031	3.73e-06	-1
TNFRSF17	0.830565	0.0004049	3.78e-06	-1
LOC399744	0.785546	0.0004068	3.78e-06	-1
RHPN1	0.786782	0.000418	3.94e-06	-1
VPREB3	0.87184	0.0004283	4.05e-06	-1
SPTAN1	0.803213	0.0004495	4.28e-06	-1
NOG	0.783699	0.0004623	4.42e-06	-1
OAS1	0.869565	0.0004661	4.48e-06	-1
TCF3	0.791139	0.0004966	4.79e-06	-1
PKM2	0.792393	0.0005082	4.93e-06	-1
CCNT1	0.803213	0.0005155	5.02e-06	-1
FBLN2	0.788644	0.0005395	5.28e-06	-1
LSP1	0.791766	0.0005637	5.54e-06	-1
GHDC	0.778816	0.0005691	5.62e-06	-1
SLC5A8	0.917431	0.0005842	5.79e-06	-1
BRI3	0.805153	0.0007284	7.45e-06	-1
METTL5	0.800641	0.0007306	7.44e-06	-1
AP2S1	0.791139	0.0007312	7.35e-06	-1
ARHGDIA	0.81367	0.0007318	7.42e-06	-1
UBE1	0.81103	0.0007349	7.55e-06	-1
ZNF121	0.830565	0.0007349	7.42e-06	-1
HMG1L1	0.83682	0.0007447	7.69e-06	-1
LOC727922	0.826446	0.0007453	7.73e-06	-1
LOC729021	0.823723	0.0007575	7.89e-06	-1
MKNK2	0.797448	0.0007581	7.93e-06	-1
SERTAD2	0.803859	0.0007738	8.13e-06	-1
JARID1C	0.786164	0.0007753	8.21e-06	-1
PNPLA2	0.811688	0.0007783	8.21e-06	-1
TPI1	0.815661	0.0007832	8.44e-06	-1
FYN	0.865052	0.0007844	8.35e-06	-1
DGKQ	0.810373	0.0007861	8.43e-06	-1
SIN3B	0.814996	0.0007881	8.42e-06	-1
CRTC1	0.785546	0.0008151	8.82e-06	-1
TBC1D10C	0.802568	0.0008369	9.13e-06	-1
APBB1IP	0.797448	0.0008371	9.09e-06	-1
PCYOX1L	0.802568	0.0008421	9.22e-06	-1
ZAP70	0.838926	0.0008482	9.33e-06	-1
EIF1AX	0.849618	0.0008631	9.53e-06	-1
PTOV1	0.802568	0.0008636	9.62e-06	-1
SPI1	0.839631	0.0008654	9.6e-06	-1
GYPC	0.818331	0.0008828	9.87e-06	-1
SPPL2B	0.791766	0.0009021	1.02e-05	-1
EEF1D	0.822368	0.0009054	1.02e-05	-1
CENPT	0.807103	0.0009059	1.03e-05	-1
IBRDC3	0.834028	0.0009364	1.06e-05	-1
PKN1	0.813008	0.0009365	1.07e-05	-1
C20orf149	0.823723	0.0009378	1.07e-05	-1
PSMC4	0.851064	0.0009416	1.08e-05	-1
HSD17B11	0.843882	0.0009584	1.11e-05	-1
ATP5D	0.791766	0.0009632	1.12e-05	-1
PYGO2	0.796178	0.0009637	1.12e-05	-1
GDI1	0.823045	0.0009926	1.16e-05	-1
POLR2J3	0.825083	0.001044	1.22e-05	-1
XAB2	0.825764	0.001045	1.23e-05	-1
PPARD	0.805153	0.001076	1.29e-05	-1
KIAA0125	0.807103	0.001076	1.3e-05	-1
CLEC11A	0.811688	0.001078	1.29e-05	-1
IFIT1	0.883392	0.001079	1.28e-05	-1
TCF7	0.794281	0.001085	1.31e-05	-1
TNFRSF13B	0.826446	0.00109	1.32e-05	-1
THOC4	0.846024	0.001142	1.39e-05	-1
SS18	0.833333	0.001151	1.41e-05	-1
AMY2B	0.848896	0.001392	1.72e-05	-1
FASTK	0.811688	0.001396	1.72e-05	-1
CSNK1G2	0.802568	0.001403	1.74e-05	-1
ZNF500	0.802568	0.001419	1.78e-05	-1
HLA-DRB3	0.851064	0.001423	1.78e-05	-1
SIGIRR	0.840336	0.001426	1.77e-05	-1
MAD1L1	0.816327	0.001431	1.8e-05	-1
ZFPM1	0.813008	0.001435	1.81e-05	-1
LGALS9	0.806452	0.001482	1.88e-05	-1
OFD1	0.830565	0.001484	1.89e-05	-1
NT5C3	0.86881	0.001493	1.92e-05	-1
RBM4	0.818331	0.001498	1.92e-05	-1
PTPN23	0.816327	0.001498	1.94e-05	-1
P2RX5	0.807754	0.001502	1.95e-05	-1
LDHB	0.81103	0.001521	1.98e-05	-1
HMGN2	0.832639	0.001521	1.99e-05	-1
SETD1A	0.818331	0.001556	2.05e-05	-1
ATN1	0.812348	0.00156	2.06e-05	-1
RNF125	0.983284	0.001577	2.09e-05	-1
PRKCB1	0.818331	0.00159	2.12e-05	-1
USP9Y	0.970874	0.001592	2.12e-05	-1
POMZP3	0.825764	0.00163	2.21e-05	-1
LOC348262	0.805802	0.001634	2.2e-05	-1
CORO1A	0.801282	0.001638	2.22e-05	-1
PTMA	0.862813	0.001638	2.2e-05	-1
LOC729416	0.94697	0.001675	2.28e-05	-1
SLC2A14	0.902527	0.001755	2.4e-05	-1
UBAP2L	0.819001	0.00176	2.41e-05	-1
AGPAT3	0.83612	0.001768	2.44e-05	-1
DCAL1	0.825083	0.001769	2.43e-05	-1
EPHX2	0.830565	0.001774	2.47e-05	-1
CNTNAP2	0.940734	0.001777	2.47e-05	-1
PDE3B	0.832639	0.001779	2.46e-05	-1
CST3	0.816993	0.001788	2.54e-05	-1
TBRG4	0.815661	0.001792	2.54e-05	-1
ISG15	0.912409	0.001794	2.53e-05	-1
C1orf43	0.83682	0.001797	2.53e-05	-1
PPIA	0.818331	0.001802	2.53e-05	-1
C13orf18	0.829187	0.001803	2.52e-05	-1
ALS2CR13	0.812348	0.001807	2.57e-05	-1
CHKB	0.833333	0.001857	2.7e-05	-1
TNRC5	0.829876	0.001862	2.69e-05	-1
CD27	0.835422	0.001864	2.71e-05	-1
BRD4	0.892061	0.001864	2.66e-05	-1
CDC2L1	0.853971	0.001866	2.68e-05	-1
POU2AF1	0.821018	0.001867	2.73e-05	-1
CFD	0.891266	0.001914	2.81e-05	-1
RPL7	0.839631	0.001924	2.84e-05	-1
ACIN1	0.808407	0.001954	2.89e-05	-1
GRHL1	0.909918	0.001957	2.9e-05	-1
COL6A2	0.831255	0.00203	3.02e-05	-1
SPN	0.984252	0.002046	3.05e-05	-1
ZNF700	0.835422	0.002052	3.07e-05	-1
COX6B1	0.818331	0.002056	3.09e-05	-1
ZNF444	0.814332	0.002056	3.1e-05	-1
TGFBR2	0.899281	0.002082	3.16e-05	-1
DLGAP4	0.817661	0.002082	3.14e-05	-1
ITFG3	0.805802	0.002085	3.16e-05	-1
RHOT2	0.826446	0.002093	3.19e-05	-1
TCL1A	0.931099	0.002122	3.24e-05	-1
STAG2	0.839631	0.002139	3.28e-05	-1
PPP1CA	0.827815	0.00214	3.29e-05	-1
DDX3Y	0.924214	0.00218	3.36e-05	-1
LONP1	0.819001	0.002182	3.37e-05	-1
PLCG1	0.822368	0.002271	3.54e-05	-1
DYRK1B	0.805153	0.002272	3.52e-05	-1
ZC3H3	0.804505	0.002277	3.54e-05	-1
C16orf30	0.824402	0.002347	3.67e-05	-1
HSPC152	0.831947	0.002354	3.7e-05	-1
BCL3	0.819672	0.002363	3.77e-05	-1
AIF1	0.852515	0.002365	3.76e-05	-1
DNHD1	0.816993	0.00237	3.76e-05	-1
MAPK8IP1	0.855432	0.002371	3.81e-05	-1
IFITM3	0.998004	0.002371	3.75e-05	-1
IIP45	0.809061	0.002374	3.75e-05	-1
CD69	0.993049	0.002414	3.88e-05	-1
HERC3	0.834725	0.002432	3.92e-05	-1
TMEM112B	0.831947	0.002561	4.16e-05	-1
ENSA	0.831255	0.002562	4.15e-05	-1
MAP1S	0.808407	0.002564	4.17e-05	-1
LYPD2	0.823045	0.002609	4.26e-05	-1
OSBPL10	0.831255	0.002657	4.35e-05	-1
TARP	0.869565	0.002723	4.47e-05	-1
PPP2R5D	0.81103	0.002766	4.55e-05	-1
LAGE3	0.814332	0.002797	4.61e-05	-1
GTF3C1	0.831947	0.002823	4.67e-05	-1
GOLGA8A	0.866551	0.002851	4.73e-05	-1
DKFZP434B0335	0.839631	0.002875	4.81e-05	-1
LOC441168	0.935454	0.002878	4.8e-05	-1
STIM1	0.817661	0.002944	4.95e-05	-1
INPP5E	0.860585	0.00301	5.08e-05	-1
NT5E	0.843882	0.00304	5.14e-05	-1
FAM73B	0.830565	0.00306	5.2e-05	-1
PIGY	0.837521	0.003065	5.2e-05	-1
CENTB1	0.855432	0.003066	5.22e-05	-1
FCER1A	0.882613	0.003073	5.27e-05	-1
MXD3	0.816327	0.003076	5.26e-05	-1
BTG2	0.88968	0.003081	5.29e-05	-1
RPL22	0.833333	0.0031	5.34e-05	-1
RHOB	0.873362	0.003115	5.43e-05	-1
PDE7A	0.819001	0.003119	5.43e-05	-1
Sep-15	0.858369	0.003122	5.46e-05	-1
MS4A7	0.915751	0.003124	5.42e-05	-1
NFKB2	0.816327	0.00313	5.42e-05	-1
USP5	0.810373	0.003136	5.41e-05	-1
PITPNM1	0.830565	0.003142	5.51e-05	-1
PYGB	0.831947	0.003154	5.55e-05	-1
C5orf16	0.823045	0.003169	5.6e-05	-1
TMEM16H	0.82713	0.003234	5.73e-05	-1
AFF3	0.858369	0.003238	5.75e-05	-1
H2AFY	0.849618	0.003338	5.94e-05	-1
PACAP	0.823723	0.003345	5.97e-05	-1
TBCD	0.87184	0.003359	6.01e-05	-1
TCIRG1	0.849618	0.003391	6.08e-05	-1
BACH2	0.818331	0.003427	6.16e-05	-1
BAT1	0.844595	0.003433	6.19e-05	-1
KLRB1	0.881834	0.00351	6.34e-05	-1
AKTIP	0.816327	0.003517	6.41e-05	-1
YPEL3	0.83682	0.003519	6.38e-05	-1
FAM49B	0.852515	0.003521	6.4e-05	-1
HAT1	0.848176	0.003536	6.46e-05	-1
PURA	0.834725	0.003541	6.48e-05	-1
HIST2H2BE	0.961538	0.003583	6.61e-05	-1
PDCD4	0.909091	0.003586	6.6e-05	-1
CXYorf3	0.831255	0.003593	6.59e-05	-1
CCNC	0.845309	0.003699	6.84e-05	-1
SLC39A3	0.82713	0.003731	6.91e-05	-1
USMG5	0.894454	0.003735	6.94e-05	-1
TLR10	0.824402	0.003752	6.99e-05	-1
CITED2	0.839631	0.003819	7.13e-05	-1
LOC90624	0.840336	0.003832	7.17e-05	-1
ADD3	0.847458	0.003892	7.3e-05	-1
DNAJB14	0.85034	0.003929	7.39e-05	-1
SDCBP	0.867303	0.003944	7.47e-05	-1
UQCRC2	0.823723	0.003952	7.46e-05	-1
PKD1	0.829876	0.003999	7.61e-05	-1
EP300	0.826446	0.004051	7.73e-05	-1
STXBP2	0.841043	0.004053	7.78e-05	-1
MTA1	0.84246	0.004059	7.78e-05	-1
DRAP1	0.837521	0.00406	7.76e-05	-1
MBTPS1	0.866551	0.004084	7.88e-05	-1
SNAP23	0.94162	0.00409	7.87e-05	-1
STK17B	0.968054	0.004119	7.97e-05	-1
SORBS3	0.814332	0.004121	8.06e-05	-1
LAP3	0.906618	0.004128	8.04e-05	-1
PTGES3	0.866551	0.00414	8.02e-05	-1
LOC653635	0.848176	0.004157	8.15e-05	-1
RANBP1	0.825083	0.004219	8.29e-05	-1
C17orf62	0.829187	0.00424	8.35e-05	-1
PILRB	0.854701	0.004283	8.46e-05	-1
DYNLRB1	0.839631	0.00432	8.59e-05	-1
SUMF2	0.882613	0.004325	8.58e-05	-1
TMED10	0.856898	0.004329	8.57e-05	-1
PLEKHB2	0.856164	0.004383	8.73e-05	-1
TCF4	0.821693	0.004394	8.79e-05	-1
MCL1	0.859107	0.004402	8.79e-05	-1
IFIT2	0.948767	0.004439	8.9e-05	-1
HLA-DOB	0.867303	0.004518	9.08e-05	-1
CEL	0.829187	0.004584	9.24e-05	-1
UPF3A	0.902527	0.004623	9.36e-05	-1
FAM102A	0.829187	0.004652	9.46e-05	-1
GSTM2	0.859845	0.004808	9.8e-05	-1
BAT2	0.8285	0.004873	9.95e-05	-1
C4orf30	0.925926	0.004889	0.0001001	-1
AHCY	0.826446	0.004933	0.0001012	-1
DPP9	0.846024	0.004934	0.0001016	-1
DHX30	0.831255	0.004936	0.0001015	-1
ELOVL5	0.848176	0.004977	0.000103	-1
FCER2	0.901713	0.005006	0.0001045	-1
SYNJ2	0.831255	0.005008	0.0001041	-1
CIC	0.839631	0.005011	0.0001044	-1
TCP1	0.866551	0.005018	0.000104	-1
C1orf63	0.852515	0.005039	0.0001056	-1
OAS3	0.844595	0.00508	0.0001067	-1
CXorf34	0.960615	0.005263	0.0001113	-1
DISC1	0.851064	0.005285	0.000112	-1
FAM18B	0.846024	0.005286	0.0001122	-1
NCOR2	0.822368	0.005343	0.0001142	-1
LSM7	0.83682	0.005352	0.0001141	-1
HIST1H3H	0.999001	0.005396	0.0001155	-1
PTK2B	0.843882	0.005465	0.0001175	-1
CENPK	0.915751	0.005472	0.0001174	-1
SELL	0.843882	0.005563	0.0001201	-1
BPTF	0.849618	0.00557	0.0001205	-1
IRF3	0.849618	0.005583	0.0001211	-1
PCDHGA1	0.909091	0.005709	0.000124	-1
SAFB2	0.83682	0.00579	0.0001261	-1
C11orf2	0.831947	0.005809	0.0001267	-1
MED25	0.84317	0.005824	0.0001273	-1
CSK	0.823723	0.005854	0.0001282	-1
YRDC	0.97561	0.005875	0.0001292	-1
TMEM134	0.832639	0.005905	0.0001302	-1
ARFGAP1	0.84246	0.005908	0.0001308	-1
HSPH1	0.843882	0.005909	0.0001305	-1
E2F5	0.831947	0.00603	0.0001337	-1
ZSCAN18	0.84246	0.006033	0.0001341	-1
ACADM	0.86881	0.006171	0.0001374	-1
ST6GAL1	0.831255	0.006199	0.0001383	-1
KLRD1	0.930233	0.006241	0.0001395	-1
SH3BGRL3	0.849618	0.006271	0.0001405	-1
HSPB1	0.851064	0.006278	0.0001409	-1
PELP1	0.841751	0.006337	0.0001425	-1
PRDX3	0.863558	0.006454	0.0001455	-1
C6orf111	0.848176	0.006522	0.0001473	-1
ENOSF1	0.861326	0.006523	0.0001476	-1
IMMT	0.829187	0.006544	0.0001484	-1
COL8A2	0.860585	0.006581	0.0001495	-1
ZUBR1	0.833333	0.006649	0.000152	-1
UNC93B1	0.8285	0.006658	0.0001519	-1
LYPLA2	0.823723	0.00677	0.0001553	-1
DMWD	0.852515	0.006782	0.0001553	-1
ELA1	0.84317	0.006809	0.0001565	-1
RLTPR	0.841751	0.006838	0.0001575	-1
RGS19	0.83682	0.006838	0.0001578	-1
SH3GLB2	0.84246	0.006839	0.0001582	-1
NDUFV1	0.84674	0.006864	0.000159	-1
AKNA	0.834725	0.006875	0.0001599	-1
GIMAP6	0.846024	0.006888	0.0001599	-1
SREBF2	0.83612	0.006917	0.0001612	-1
CCR2	0.934579	0.006941	0.0001621	-1
HTRA2	0.84246	0.006962	0.0001629	-1
BRDG1	0.863558	0.007118	0.0001668	-1
DYNLT3	0.865801	0.007265	0.0001713	-1
MRPL41	0.837521	0.007268	0.0001717	-1
DUT	0.834028	0.007391	0.0001749	-1
MORC3	0.870322	0.007466	0.000177	-1
TBC1D4	0.848176	0.007485	0.0001778	-1
EXOSC5	0.819001	0.007557	0.0001799	-1
CTSB	0.854701	0.0076	0.0001812	-1
PAQR8	0.860585	0.007611	0.0001818	-1
RORC	0.849618	0.007697	0.0001842	-1
SIRPG	0.84246	0.00776	0.0001861	-1
BTN3A2	0.886525	0.007774	0.0001868	-1
USH1G	0.906618	0.007916	0.0001906	-1
HSPE1	0.848176	0.007988	0.0001926	-1
GIT1	0.841751	0.007996	0.0001932	-1
FLJ11171	0.863558	0.008028	0.0001943	-1
CYBA	0.834028	0.008219	0.0001993	-1
LOC442578	0.862069	0.00822	0.0001997	-1
RABAC1	0.84317	0.008325	0.0002026	-1
C11orf68	0.831947	0.008353	0.0002041	-1
BFAR	0.834725	0.008359	0.0002038	-1
C7orf23	0.83612	0.008507	0.0002082	-1
IRF5	0.914077	0.008585	0.0002105	-1
HIST1H4H	0.993049	0.008679	0.0002136	-1
SLC30A5	0.864304	0.008717	0.0002149	-1
CD44	0.881057	0.008759	0.0002164	-1
PLEKHF2	0.874891	0.008826	0.0002184	-1
NUDT14	0.830565	0.008878	0.0002205	-1
CTNNB1	0.888099	0.008883	0.0002202	-1
BLNK	0.844595	0.008923	0.0002228	-1
EIF3S5	0.83682	0.008928	0.0002222	-1
CCNL1	0.901713	0.008938	0.0002228	-1
FAM43A	0.937207	0.00913	0.0002288	-1
LOC375133	0.881057	0.009171	0.0002303	-1
APRT	0.84246	0.009269	0.0002336	-1
KLRG1	0.897666	0.00927	0.000234	-1
CDKN1C	0.908265	0.009283	0.0002335	-1
KIFC2	0.860585	0.009357	0.0002366	-1
C7orf26	0.829187	0.00943	0.0002389	-1
HIATL2	0.88968	0.009503	0.0002412	-1
GBP1	0.913242	0.009875	0.0002511	-1
POLRMT	0.840336	0.009911	0.0002524	-1
C19orf22	0.856898	0.009964	0.0002542	-1
NRCAM	0.838926	0.009973	0.0002558	-1
FCER1G	0.869565	0.009983	0.0002556	-1
TAPBP	0.844595	0.01004	0.0002579	-1
LOC728188	0.881057	0.01017	0.0002618	-1
UGCG	0.892061	0.01018	0.0002626	-1
NAPSA	0.88968	0.01023	0.0002652	-1
BCL2L1	0.888099	0.01024	0.0002646	-1
CD4	0.862069	0.01024	0.000265	-1
CRTC2	0.848896	0.01038	0.0002695	-1
TMEM8	0.896861	0.01066	0.0002772	-1
HNRPUL1	0.841043	0.01108	0.0002892	-1
RASSF1	0.862813	0.01113	0.0002911	-1
SREBF1	0.845309	0.01119	0.0002932	-1
NFIX	0.857633	0.01133	0.0002973	-1
MFSD11	0.942507	0.01147	0.0003019	-1
SATB1	0.853242	0.01147	0.0003013	-1
LOC646531	0.862069	0.01151	0.0003036	-1
SPIB	0.845309	0.01154	0.0003049	-1
SDF4	0.837521	0.01172	0.0003116	-1
RASGRP2	0.856898	0.01172	0.0003112	-1
TAGAP	0.88968	0.01174	0.0003111	-1
CBLL1	0.853242	0.01175	0.0003131	-1
LOC440993	0.919963	0.01178	0.0003144	-1
IFI44	0.908265	0.01179	0.0003158	-1
SAC3D1	0.843882	0.01181	0.0003156	-1
CD40LG	0.841043	0.01198	0.0003213	-1
TYROBP	0.864304	0.01199	0.0003223	-1
OLIG1	0.910747	0.01203	0.0003238	-1
SMAP1L	0.8726	0.0121	0.0003261	-1
NIBP	0.859845	0.01214	0.0003277	-1
LPHN1	0.834725	0.01217	0.0003292	-1
PHF17	0.860585	0.0122	0.0003306	-1
ZNF654	0.877963	0.01222	0.0003317	-1
VIPR1	0.849618	0.01236	0.0003359	-1
DPYD	0.921659	0.01239	0.0003373	-1
NFE2L2	0.882613	0.01256	0.0003424	-1
TRIM56	0.845309	0.01259	0.0003439	-1
TUBA1A	0.883392	0.01265	0.0003479	-1
MRPL38	0.838223	0.01266	0.0003486	-1
C9orf142	0.851789	0.01267	0.0003478	-1
CTGLF5	0.881057	0.01268	0.000347	-1
IFIT3	0.961538	0.01268	0.0003474	-1
SDHA	0.87184	0.0127	0.0003503	-1
ZNF154	0.84246	0.01271	0.0003512	-1
TMEM51	0.88968	0.01278	0.0003542	-1
INPP4A	0.84317	0.01282	0.0003567	-1
FAM129C	0.892857	0.01284	0.0003566	-1
SDHD	0.911577	0.01291	0.0003609	-1
DKFZp564K142	0.980392	0.01292	0.0003605	-1
SLC27A6	0.886525	0.01292	0.00036	-1
WDR23	0.999001	0.01311	0.0003669	-1
ZNF217	0.904159	0.01317	0.0003694	-1
NSUN5	0.837521	0.01333	0.0003749	-1
CIAO1	0.892061	0.01343	0.0003785	-1
DHX9	0.892857	0.01347	0.0003806	-1
LTBP4	0.877963	0.01348	0.0003804	-1
MGC3020	0.854701	0.01351	0.0003829	-1
GIMAP7	0.860585	0.01364	0.0003873	-1
PAICS	0.840336	0.01372	0.0003902	-1
HSH2D	0.927644	0.01374	0.0003915	-1
ZCCHC11	0.859845	0.01376	0.0003928	-1
AGMAT	0.888099	0.01379	0.0003948	-1
BTN3A3	0.957854	0.01379	0.0003942	-1
CTR9	0.843882	0.01388	0.0003979	-1
HAPLN3	0.865801	0.01405	0.0004041	-1
ATP6V1G2	0.837521	0.01411	0.0004065	-1
CHTF18	0.868056	0.01423	0.0004105	-1
BASP1	0.868056	0.01428	0.0004125	-1
ZNF791	0.899281	0.01435	0.0004166	-1
ACTN4	0.875657	0.01437	0.0004165	-1
CBX4	0.849618	0.01438	0.0004163	-1
LOC441193	0.853242	0.0144	0.0004187	-1
DCUN1D1	0.919118	0.01444	0.0004205	-1
NR1D2	0.914913	0.01445	0.0004216	-1
FKBP2	0.881834	0.0145	0.0004237	-1
ATP13A2	0.84246	0.01457	0.0004262	-1
Sep-02	0.858369	0.01462	0.0004283	-1
OR2A1	0.877193	0.01464	0.0004297	-1
RBBP7	0.84674	0.01466	0.0004316	-1
NACA	0.853971	0.01467	0.0004324	-1
HSMPP8	0.905797	0.01479	0.0004381	-1
MNDA	0.97561	0.0148	0.0004377	-1
SAR1B	0.873362	0.0148	0.0004371	-1
DNM2	0.852515	0.01481	0.00044	-1
PPM1K	0.892061	0.01482	0.0004394	-1
ZNF385	0.869565	0.01494	0.0004444	-1
LDLRAP1	0.874126	0.01495	0.0004456	-1
TXNL1	0.870322	0.01501	0.0004485	-1
GNG10	0.881834	0.01502	0.0004483	-1
PSD4	0.851789	0.01509	0.0004516	-1
WDR5	0.852515	0.01511	0.000453	-1
C19orf24	0.841751	0.01518	0.0004557	-1
LAX1	0.904977	0.0152	0.0004571	-1
RARA	0.847458	0.01521	0.0004588	-1
FLJ00038	0.880282	0.01522	0.0004582	-1
CNOT7	0.868056	0.0153	0.000462	-1
MGC10433	0.860585	0.01546	0.0004676	-1
HLA-G	0.893655	0.01555	0.0004711	-1
CDC25B	0.859107	0.01589	0.0004819	-1
MARCKSL1	0.848896	0.01591	0.0004834	-1
SPON2	0.843882	0.01602	0.0004874	-1
AKAP8L	0.902527	0.01609	0.0004911	-1
TMUB1	0.866551	0.01609	0.0004905	-1
PCQAP	0.877193	0.01618	0.0004946	-1
ARMCX2	0.85034	0.01627	0.0004981	-1
MORF4L1	0.866551	0.01637	0.0005017	-1
DGCR8	0.901713	0.01645	0.0005049	-1
OGFR	0.85034	0.01654	0.0005086	-1
RPS6KA4	0.862069	0.01661	0.0005121	-1
GRK6	0.851789	0.01661	0.0005113	-1
TMEM123	0.877193	0.01662	0.0005132	-1
TTLL3	0.864304	0.01664	0.0005145	-1
CROP	0.857633	0.01679	0.0005201	-1
ANXA2	0.881834	0.01681	0.000522	-1
RANBP10	0.84317	0.01682	0.0005217	-1
GNG7	0.922509	0.01691	0.0005268	-1
MYC	0.892061	0.01693	0.0005267	-1
PDCD7	0.863558	0.01696	0.0005299	-1
CDCA7L	0.906618	0.01713	0.0005358	-1
SIAH1	0.881057	0.01724	0.0005409	-1
YWHAG	0.857633	0.01729	0.0005434	-1
LOC147804	0.860585	0.01731	0.0005446	-1
PEX14	0.841751	0.01735	0.00055	-1
COPE	0.851789	0.01735	0.0005489	-1
BIN1	0.875657	0.01735	0.0005467	-1
C20orf59	0.83612	0.01737	0.0005511	-1
NBPF14	0.961538	0.01739	0.0005488	-1
SCML1	0.869565	0.0174	0.0005531	-1
RAB24	0.874126	0.01756	0.0005597	-1
HYOU1	0.840336	0.01758	0.0005594	-1
C5orf29	0.930233	0.01763	0.0005627	-1
CPNE5	0.857633	0.01763	0.0005633	-1
BCL7B	0.843882	0.01763	0.0005651	-1
NDUFB6	0.855432	0.01764	0.0005647	-1
ITGA4	0.908265	0.01771	0.0005684	-1
WASF2	0.858369	0.01777	0.0005711	-1
GALNACT-2	0.95511	0.01778	0.0005722	-1
PA2G4	0.85034	0.01796	0.0005798	-1
FDFT1	0.85034	0.0181	0.0005859	-1
PWWP2	0.845309	0.01822	0.0005904	-1
LASS6	0.848176	0.01834	0.0005961	-1
RBL2	0.862069	0.01835	0.0005955	-1
HLA-DOA	0.87108	0.01838	0.0005991	-1
FLJ39653	0.855432	0.01841	0.000599	-1
ZNF3	0.848176	0.01851	0.0006049	-1
SNF1LK	0.935454	0.01853	0.0006046	-1
RELA	0.845309	0.01855	0.0006071	-1
SULF2	0.88968	0.01859	0.0006099	-1
PIP5K1C	0.862069	0.01868	0.0006147	-1
MAP2K2	0.841751	0.01882	0.0006202	-1
TSC2	0.852515	0.01889	0.0006242	-1
PPID	0.864304	0.0189	0.0006235	-1
VAMP1	0.859107	0.01903	0.0006296	-1
CAPZA1	0.925926	0.01908	0.0006323	-1
IGBP1	0.84674	0.0191	0.0006347	-1
NALP1	0.910747	0.01913	0.0006371	-1
UQCRH	0.887311	0.01914	0.0006367	-1
HINT1	0.859107	0.01927	0.0006444	-1
FAM122B	0.862813	0.01929	0.0006444	-1
TADA3L	0.846024	0.01931	0.0006468	-1
TUBGCP6	0.877963	0.01931	0.0006441	-1
SCML4	0.845309	0.01939	0.0006503	-1
ITM2A	0.901713	0.01946	0.0006543	-1
CD302	0.956938	0.01948	0.0006542	-1
USP33	0.887311	0.01953	0.0006585	-1
C11orf35	0.869565	0.01966	0.0006638	-1
SP110	0.869565	0.01974	0.0006673	-1
FCRL1	0.933707	0.01974	0.0006682	-1
PVRIG	0.853971	0.01985	0.000673	-1
TRIM5	0.884956	0.01994	0.0006768	-1
CALR	0.865801	0.01998	0.0006792	-1
KLRC3	0.971817	0.02001	0.0006812	-1
RNF40	0.848176	0.02003	0.0006827	-1
DDX21	0.873362	0.02007	0.0006858	-1
IL1B	0.982318	0.02011	0.0006906	-1
ACD	0.856898	0.02012	0.0006903	-1
PNN	0.869565	0.02014	0.0006901	-1
ADNP	0.897666	0.02017	0.00069	-1
AHSA2	0.882613	0.02038	0.0007011	-1
RPL9	0.862813	0.02044	0.0007086	-1
METRNL	0.88968	0.02045	0.0007062	-1
KIAA1787	0.859845	0.02046	0.0007084	-1
C3orf63	0.864304	0.02046	0.0007102	-1
EVI2A	0.904977	0.02047	0.000706	-1
CMTM8	0.926784	0.0205	0.0007123	-1
TIMM9	0.84674	0.02058	0.0007163	-1
TMEM14B	0.873362	0.02061	0.000718	-1
DTX3	0.868056	0.02078	0.0007249	-1
PSME3	0.861326	0.02078	0.000726	-1
WBSCR18	0.858369	0.02087	0.00073	-1
AP2A1	0.858369	0.0209	0.000732	-1
TMED7	0.892857	0.021	0.0007376	-1
RPL36	0.865052	0.021	0.0007366	-1
CBX1	0.851064	0.02114	0.0007432	-1
NAP1L4	0.877193	0.02116	0.0007461	-1
NAP1L1	0.90009	0.02119	0.0007459	-1
BBS2	0.873362	0.02125	0.0007511	-1
CEBPD	0.888889	0.02127	0.0007508	-1
BIRC2	0.891266	0.02131	0.0007541	-1
PDPR	0.924214	0.02135	0.0007582	-1
CGI-38	0.880282	0.02135	0.0007564	-1
OAT	0.859107	0.02137	0.0007581	-1
TMEM149	0.906618	0.02147	0.0007635	-1
ID2	0.88574	0.02153	0.0007668	-1
RAI1	0.845309	0.02165	0.0007718	-1
AGXT2L2	0.893655	0.02189	0.0007815	-1
AP3M1	0.902527	0.02194	0.0007845	-1
SURF5	0.855432	0.02195	0.0007856	-1
GIYD2	0.879507	0.02226	0.0007999	-1
NEDD8	0.861326	0.02226	0.0007987	-1
RIN3	0.852515	0.02227	0.000801	-1
FGFBP2	0.990099	0.02227	0.0007981	-1
FURIN	0.862069	0.02246	0.0008091	-1
DEAF1	0.845309	0.02267	0.0008196	-1
BCDO2	0.867303	0.02268	0.0008188	-1
ILF2	0.847458	0.02268	0.000823	-1
SLC22A17	0.865801	0.02269	0.0008214	-1
CD164	0.924214	0.0227	0.0008227	-1
CLEC4F	0.962464	0.02273	0.000827	-1
BCL11A	0.858369	0.02275	0.0008287	-1
CNOT3	0.857633	0.02278	0.0008307	-1
HSD17B7P2	0.968054	0.02293	0.0008371	-1
CX3CR1	0.925069	0.02302	0.0008415	-1
CR2	0.856164	0.02308	0.000847	-1
FIZ1	0.862069	0.02309	0.0008484	-1
DPH4	0.860585	0.02309	0.0008463	-1
SBNO2	0.86881	0.02312	0.0008503	-1
FKBP1A	0.892061	0.02312	0.0008463	-1
DULLARD	0.853242	0.02321	0.0008547	-1
PDPK1	0.874891	0.02341	0.0008631	-1
NRIP1	0.887311	0.02342	0.0008647	-1
LOC729843	0.865052	0.02362	0.0008732	-1
KIAA0319L	0.8726	0.02364	0.0008748	-1
SP4	0.88968	0.02371	0.0008794	-1
AP2A2	0.856164	0.02371	0.0008787	-1
PEBP1	0.867303	0.02391	0.0008892	-1
BCKDHA	0.865801	0.02392	0.0008907	-1
CNN2	0.859845	0.02399	0.0008945	-1
C1orf159	0.855432	0.02445	0.0009169	-1
ADSS	0.907441	0.0247	0.0009275	-1
SEPN1	0.864304	0.02472	0.0009293	-1
SIVA1	0.894454	0.02488	0.0009376	-1
UNC13D	0.908265	0.02488	0.0009363	-1
SSRP1	0.863558	0.02504	0.0009449	-1
ANKRD15	0.917431	0.02543	0.0009607	-1
FLJ36208	0.848176	0.02547	0.0009633	-1
CRSP3	0.894454	0.02556	0.0009679	-1
RSAD2	0.874126	0.02562	0.0009714	-1
BRD8	0.856898	0.02591	0.0009832	-1
USF2	0.855432	0.02592	0.0009848	-1
MAP3K11	0.869565	0.02606	0.0009927	-1
NMI	0.865801	0.02608	0.0009924	-1
ATG16L2	0.949668	0.02609	0.0009961	-1
COL9A2	0.861326	0.0262	0.001003	-1
RPS5	0.875657	0.02654	0.001017	-1
PRMT6	0.874126	0.02659	0.00102	-1
FCRL2	0.858369	0.02663	0.001023	-1
HIF1A	0.96432	0.02667	0.001026	-1
TMEM14C	0.862069	0.02672	0.001029	-1
PTPRCAP	0.895255	0.02688	0.001037	-1
ZNFX1	0.847458	0.02689	0.001036	-1
TMEM142A	0.867303	0.02708	0.001046	-1
HSP90AB1	0.84674	0.02748	0.001063	-1
C9orf46	0.868056	0.02753	0.001066	-1
PNPLA7	0.94697	0.02764	0.001071	-1
UAP1L1	0.904159	0.02765	0.001073	-1
SERPINE2	0.958773	0.02771	0.001077	-1
LACTB	0.860585	0.02773	0.001079	-1
CDC42EP2	0.862813	0.02796	0.00109	-1
MLLT11	0.857633	0.02796	0.001089	-1
HSPA8	0.904977	0.02812	0.001098	-1
SERPINF1	0.878735	0.02836	0.001108	-1
KRCC1	0.914913	0.02846	0.001114	-1
LST1	0.909091	0.02849	0.001116	-1
MAT2B	0.907441	0.02858	0.001126	-1
CD3D	0.875657	0.0286	0.001128	-1
QPCT	0.960615	0.0286	0.001124	-1
MGC52000	0.88574	0.0286	0.001126	-1
LOC113179	0.848896	0.02861	0.001123	-1
LOC646517	0.914077	0.02865	0.001123	-1
SLC16A11	0.848896	0.0287	0.001133	-1
POLR3E	0.846024	0.02871	0.001135	-1
POLR2C	0.86881	0.02882	0.001142	-1
LIME1	0.856898	0.02883	0.001141	-1
RPS6KA5	0.904977	0.02883	0.001144	-1
PTPLAD1	0.87108	0.02899	0.001151	-1
APEX1	0.853971	0.02899	0.001153	-1
SAMD1	0.87108	0.029	0.001154	-1
FAM3A	0.864304	0.02903	0.001158	-1
SRM	0.877193	0.02904	0.001157	-1
APEX2	0.867303	0.02919	0.001166	-1
C13orf27	0.861326	0.02933	0.001173	-1
RALGPS2	0.884956	0.02942	0.001178	-1
STAU1	0.860585	0.02961	0.001186	-1
RPS13	0.846024	0.02967	0.001193	-1
FGFRL1	0.886525	0.02967	0.001192	-1
SP3	0.899281	0.02968	0.001191	-1
ERGIC2	0.901713	0.02978	0.001199	-1
P117	0.864304	0.0301	0.001213	-1
TRADD	0.886525	0.03024	0.00122	-1
C11orf46	0.898473	0.03065	0.00124	-1
EIF3S9	0.855432	0.03083	0.001248	-1
ATP6V0C	0.866551	0.03085	0.00125	-1
PLSCR1	0.906618	0.03087	0.001257	-1
ATF4	0.914077	0.03087	0.001252	-1
HNRPDL	0.888099	0.03089	0.001256	-1
OGDH	0.861326	0.03092	0.001256	-1
ATBF1	0.890472	0.03112	0.001268	-1
TCF7L2	0.923361	0.03136	0.001279	-1
HLA-DPA1	0.882613	0.03142	0.001283	-1
LRRC33	0.896057	0.03149	0.001287	-1
RAB1B	0.857633	0.03173	0.0013	-1
CAMK2B	0.852515	0.03174	0.001302	-1
ABCB8	0.85034	0.03175	0.001299	-1
TSPAN13	0.908265	0.03185	0.001308	-1
C1QBP	0.865052	0.03202	0.001316	-1
XRCC6	0.861326	0.03215	0.001323	-1
SORL1	0.908265	0.03238	0.001337	-1
C21orf33	0.86881	0.0324	0.001335	-1
TNFSF10	0.924214	0.0324	0.001336	-1
KLHL6	0.857633	0.03242	0.001342	-1
ATP2A2	0.873362	0.03245	0.001341	-1
RPS21	0.897666	0.03284	0.00136	-1
SPATA20	0.93985	0.03285	0.001362	-1
MKL1	0.852515	0.03304	0.001372	-1
C16orf24	0.866551	0.03321	0.001382	-1
CYB561D1	0.868056	0.0338	0.001408	-1
SFRS11	0.918274	0.03439	0.001438	-1
VIM	0.884956	0.0344	0.001437	-1
SFT2D1	0.898473	0.03442	0.001437	-1
COMMD8	0.92081	0.03465	0.001453	-1
NOMO1	0.92081	0.03468	0.001455	-1
MGC26718	0.881057	0.03502	0.001471	-1
KLHL24	0.864304	0.03505	0.001479	-1
HSPA1A	0.926784	0.03506	0.001478	-1
ZP3	0.884956	0.03506	0.001476	-1
GIMAP1	0.892061	0.03506	0.001481	-1
SUPT5H	0.87108	0.03509	0.001476	-1
IPO9	0.857633	0.03511	0.001484	-1
RUTBC3	0.859107	0.03511	0.001486	-1
ITPKB	0.87184	0.03571	0.001513	-1
WBP2	0.886525	0.03594	0.001524	-1
C6orf108	0.892061	0.03598	0.001528	-1
ACCN5	0.953289	0.03617	0.001539	-1
PPP1R12C	0.878735	0.03621	0.001539	-1
MRPL2	0.8726	0.03625	0.001546	-1
TNFRSF1A	0.874891	0.03628	0.001545	-1
PTPN12	0.926784	0.03658	0.001562	-1
TPM4	0.892857	0.0369	0.001577	-1
HLA-B	0.856898	0.03699	0.001586	-1
FCRL3	0.886525	0.03702	0.001585	-1
ICAM2	0.868056	0.03702	0.001584	-1
AKT1	0.87108	0.03704	0.001589	-1
PTPN22	0.909091	0.03718	0.001597	-1
ATP13A1	0.86881	0.03749	0.001614	-1
LFNG	0.929368	0.03753	0.001619	-1
WDR74	0.874126	0.03755	0.001618	-1
DERL3	0.854701	0.03813	0.001647	-1
CCDC64	0.884173	0.03863	0.001672	-1
CDC42SE1	0.877193	0.03865	0.001676	-1
MDM4	0.94697	0.03866	0.001675	-1
OAF	0.88968	0.03874	0.00169	-1
NCR3	0.982318	0.03875	0.001686	-1
TAZ	0.874891	0.03876	0.001684	-1
GCHFR	0.88968	0.03876	0.001688	-1
RPL14	0.968992	0.03877	0.00169	-1
CPT1B	0.928505	0.03886	0.001697	-1
BCOR	0.935454	0.03894	0.001703	-1
FRAT1	0.859845	0.03896	0.001705	-1
SH2B2	0.853242	0.03915	0.001715	-1
LITAF	0.886525	0.03915	0.001717	-1
MFSD7	0.853971	0.03947	0.001733	-1
COX8A	0.879507	0.03948	0.001735	-1
GOLGA3	0.854701	0.03961	0.001744	-1
ZNF345	0.874126	0.03963	0.001744	-1
OR1Q1	0.913242	0.03964	0.001749	-1
KPNA2	0.904977	0.03971	0.001754	-1
NUMA1	0.884173	0.03971	0.001756	-1
PILRA	0.919118	0.03979	0.001761	-1
KIAA0329	0.8726	0.03986	0.001768	-1
C14orf173	0.892857	0.03988	0.001767	-1
BXDC2	0.874126	0.03989	0.001771	-1
HEATR3	0.898473	0.03991	0.001776	-1
LOC728554	0.877193	0.03993	0.001775	-1
PRPF8	0.861326	0.04042	0.001802	-1
RTEL1	0.855432	0.04054	0.001809	-1
PGK1	0.896861	0.04061	0.001814	-1
RBED1	0.867303	0.04105	0.001841	-1
LOC729264	0.94162	0.04108	0.001839	-1
RPL17	0.896057	0.04109	0.001841	-1
ATP5J	0.878735	0.04113	0.001847	-1
PPIAL4	0.892061	0.04132	0.001859	-1
C2orf25	0.870322	0.04134	0.001862	-1
EPSTI1	0.997009	0.04134	0.001858	-1
SYTL2	0.909091	0.04183	0.001887	-1
ITPK1	0.86881	0.04186	0.001887	-1
C1orf130	0.855432	0.04186	0.001891	-1
PYCR2	0.898473	0.04195	0.001897	-1
KPNA3	0.900901	0.04225	0.00192	-1
CACHD1	0.856164	0.04226	0.001915	-1
TRIM52	0.948767	0.04228	0.001919	-1
EDF1	0.859107	0.04229	0.001918	-1
PDE4B	0.926784	0.04239	0.001932	-1
MLL	0.878735	0.04243	0.001936	-1
SCD	0.865052	0.04243	0.001932	-1
CNIH	0.908265	0.04247	0.001932	-1
ERGIC1	0.974659	0.04259	0.001947	-1
BOLA2	0.88968	0.04271	0.001954	-1
ATP5J2	0.880282	0.04273	0.001959	-1
SRP19	0.888099	0.04275	0.001962	-1
UBE2B	0.896861	0.04277	0.001959	-1
NOC4L	0.851789	0.04287	0.001969	-1
IGFBP7	0.93633	0.04353	0.002005	-1
PPP1R10	0.866551	0.04353	0.002003	-1
PKIA	0.904159	0.04354	0.002002	-1
AGPAT2	0.860585	0.04369	0.002015	-1
AK5	0.866551	0.04428	0.002046	-1
MGC52498	0.87108	0.0443	0.002045	-1
HLA-F	0.924214	0.0443	0.002049	-1
CITED4	0.911577	0.04433	0.002054	-1
PPP2R1A	0.879507	0.04434	0.002053	-1
CTSC	0.922509	0.04486	0.002081	-1
SOLH	0.897666	0.04541	0.002108	-1
CAMK1	0.88574	0.04587	0.002132	-1
AKAP7	0.881834	0.04595	0.002137	-1
FAM113A	0.873362	0.04596	0.002142	-1
DMKN	0.954198	0.04608	0.00215	-1
RNF24	0.896861	0.04628	0.002161	-1
HK3	0.91659	0.04643	0.002172	-1
SPCS1	0.859107	0.04645	0.002171	-1
VNN2	0.924214	0.04648	0.002183	-1
DDX47	0.879507	0.04651	0.002183	-1
HIST2H4A	0.965251	0.04652	0.002179	-1
ADRM1	0.878735	0.04654	0.00219	-1
AXIN1	0.886525	0.04655	0.002189	-1
PCID1	0.879507	0.04671	0.0022	-1
TNFSF8	0.914913	0.04684	0.002208	-1
IL17RA	0.915751	0.04705	0.002225	-1
PPHLN1	0.958773	0.0471	0.002225	-1
HS1BP3	0.859845	0.04717	0.002235	-1
SDCCAG1	0.884956	0.04719	0.002233	-1
RASA2	0.909091	0.04734	0.002245	-1
ACO2	0.866551	0.04741	0.00225	-1
AAMP	0.870322	0.0479	0.002276	-1
CMTM7	0.874126	0.04805	0.002285	-1
IMPDH2	0.857633	0.04818	0.002293	-1
CEP57	0.875657	0.04827	0.002311	-1
IFP38	0.914913	0.0483	0.00231	-1
YARS2	0.868056	0.04833	0.002309	-1
ARAF	0.887311	0.04837	0.002309	-1
PTPLAD2	0.928505	0.04837	0.002307	-1
CD38	0.931099	0.04837	0.002305	-1
[truncated: 16 more rows]

## Sheet: E-MTAB-5151
Gene	FC	q.Value	p.Value	Direction
CX3CR1	13.0856	6.59e-30	1.61e-34	1
TNFSF10	9.67118	5.86e-27	2.86e-31	1
CCR2	8.53242	7.08e-26	5.17e-30	1
ST8SIA4	6.59631	1.05e-21	1.02e-25	1
GIMAP8	6.00962	2.68e-20	3.26e-24	1
GIMAP6	5.95948	4.42e-20	7.54e-24	1
GIMAP4	5.76037	5.96e-20	1.16e-23	1
DDX60	5.14139	9.63e-18	2.58e-21	1
OAS1	5.2356	1.14e-17	3.61e-21	1
TLR7	4.84262	2.23e-17	7.6e-21	1
TLR8	4.89716	4.49e-17	1.64e-20	1
MNDA	4.85437	4.65e-17	1.82e-20	1
GBP1	4.6729	1.78e-16	7.82e-20	1
RAB10	4.41891	6.88e-16	3.19e-19	1
DMXL1	4.4287	7.05e-16	3.44e-19	1
XIST	7.0922	1.11e-15	5.67e-19	1
THEMIS	4.19463	7.06e-15	4.13e-18	1
IDH1	4.1425	9.42e-15	5.74e-18	1
PCMT1	3.97931	1.4e-14	8.9e-18	1
TRAF3IP3	4.04204	1.72e-14	1.13e-17	1
GAPT	3.9557	2.55e-14	1.8e-17	1
ARFIP1	3.87898	3.36e-14	2.54e-17	1
ECHDC1	3.79219	5.39e-14	4.21e-17	1
TCL1A	3.89712	7.07e-14	5.68e-17	1
LRRN3	3.88048	9.45e-14	7.83e-17	1
CETN3	3.76506	1.01e-13	8.64e-17	1
G3BP1	3.77644	1.03e-13	9.03e-17	1
STN1	3.75375	1.23e-13	1.17e-16	1
RALGPS2	3.61925	1.36e-13	1.33e-16	1
CYP1B1	3.61925	1.36e-13	1.36e-16	1
ACTL6A	3.73134	1.53e-13	1.65e-16	1
MS4A4A	3.75235	1.57e-13	1.72e-16	1
SAMD9L	3.78215	1.95e-13	2.19e-16	1
SMIM14	3.75375	2.16e-13	2.53e-16	1
SEC62	3.6245	2.63e-13	3.15e-16	1
IRF2	3.58938	3.02e-13	3.68e-16	1
ACADM	3.64964	5.7e-13	7.08e-16	1
VPS41	3.52361	6.45e-13	8.17e-16	1
FGD4	3.54988	6.8e-13	8.79e-16	1
RNASEL	3.52361	7.45e-13	9.99e-16	1
CARD8-AS1	3.54108	8.89e-13	1.24e-15	1
SGMS2	3.49895	1.15e-12	1.63e-15	1
SLFN5	3.42936	1.26e-12	1.81e-15	1
GASK1B	3.53107	1.3e-12	1.93e-15	1
DUSP7	3.4965	1.51e-12	2.35e-15	1
CTBP2	3.41413	1.71e-12	2.71e-15	1
TRIM5	3.43407	2.03e-12	3.27e-15	1
SLC35B3	3.4459	2.32e-12	3.78e-15	1
PTPN4	3.38295	2.44e-12	4.16e-15	1
KMT5B	3.45066	3.24e-12	5.69e-15	1
SETX	3.28299	5.2e-12	9.51e-15	1
PPP4R3B	3.30797	5.63e-12	1.04e-14	1
RIPOR2	3.42818	7.27e-12	1.38e-14	1
FGL2	3.45901	7.95e-12	1.53e-14	1
C9orf64	3.19795	1.1e-11	2.23e-14	1
OMA1	3.19081	1.41e-11	2.9e-14	1
MARCHF1	3.25839	1.42e-11	2.93e-14	1
MRPS31	3.16256	1.64e-11	3.47e-14	1
CD36	3.32557	2e-11	4.3e-14	1
SLC35A5	3.15657	2.03e-11	4.41e-14	1
KRCC1	3.2113	2.15e-11	4.72e-14	1
PRKACB	3.1506	2.23e-11	4.94e-14	1
MEF2C	3.1211	2.42e-11	5.49e-14	1
MEGF9	3.1746	3.26e-11	7.55e-14	1
GIMAP7	3.08642	3.67e-11	8.58e-14	1
RNF213	3.11429	3.82e-11	9.03e-14	1
LINS1	3.12402	3.83e-11	9.16e-14	1
EEA1	3.16957	3.98e-11	9.7e-14	1
CBWD2	3.0656	4.17e-11	1.04e-13	1
LRRK2	3.05998	5.65e-11	1.46e-13	1
ATP10D	3.06373	5.66e-11	1.45e-13	1
SAMD9	3.04414	6.07e-11	1.58e-13	1
AQR	3.07031	6.18e-11	1.63e-13	1
PTER	3.00842	6.52e-11	1.73e-13	1
ARMT1	3.03951	6.97e-11	1.87e-13	1
QSER1	3.03122	7.17e-11	1.94e-13	1
KCTD12	3.03398	7.29e-11	1.99e-13	1
HERC4	3.03674	8.12e-11	2.26e-13	1
CREB1	2.99043	8.61e-11	2.41e-13	1
RSBN1L	2.98864	8.75e-11	2.47e-13	1
STRN	3.03306	9.06e-11	2.58e-13	1
SLC35A1	2.96824	9.15e-11	2.65e-13	1
GALK2	3.04044	9.47e-11	2.77e-13	1
OAS2	3.09119	9.91e-11	2.95e-13	1
BRI3BP	2.9985	9.94e-11	2.93e-13	1
SLC38A9	2.96736	1.31e-10	3.96e-13	1
CYSLTR1	2.95858	1.37e-10	4.21e-13	1
DDX60L	2.95596	1.58e-10	4.94e-13	1
APAF1	2.94031	1.61e-10	5.09e-13	1
SEC23IP	2.92483	1.83e-10	5.89e-13	1
JAK2	2.95946	2.01e-10	6.56e-13	1
ASXL2	2.91375	2.02e-10	6.54e-13	1
XAF1	3.02389	2.05e-10	6.74e-13	1
HDHD2	2.9994	2.33e-10	7.72e-13	1
DDX58	2.88434	2.53e-10	8.51e-13	1
GALNT7	2.93772	2.69e-10	9.11e-13	1
HIBCH	2.88434	2.69e-10	9.18e-13	1
PHF14	2.89687	2.75e-10	9.51e-13	1
MYOF	2.91886	2.98e-10	1.05e-12	1
HSD17B4	2.93513	3.18e-10	1.15e-12	1
SPTLC2	2.85388	3.44e-10	1.25e-12	1
GIMAP1	2.86615	4.32e-10	1.61e-12	1
ZNF559	2.9146	4.35e-10	1.61e-12	1
PRF1	2.83046	4.37e-10	1.61e-12	1
NDUFAF1	2.85714	4.59e-10	1.72e-12	1
RIOX2	2.80191	4.74e-10	1.79e-12	1
CASP8AP2	2.8777	4.81e-10	1.83e-12	1
TRIM56	2.85796	5.1e-10	1.96e-12	1
TMEM260	2.85063	5.26e-10	2.04e-12	1
P2RY13	2.85307	5.35e-10	2.09e-12	1
DOCK8	2.84414	5.43e-10	2.13e-12	1
LOC283788	2.80662	5.54e-10	2.2e-12	1
OSBPL11	2.80584	5.59e-10	2.23e-12	1
BTN3A2	2.86451	5.65e-10	2.27e-12	1
OXR1	2.80662	6.01e-10	2.46e-12	1
PPIL1	2.79018	6.02e-10	2.45e-12	1
MLLT3	2.82406	6.3e-10	2.6e-12	1
SLC40A1	2.89519	6.95e-10	2.88e-12	1
LYRM7	2.79799	7.1e-10	2.98e-12	1
POU2F2	2.78009	7.1e-10	2.99e-12	1
LACTB2	2.7533	7.43e-10	3.19e-12	1
CYBC1	2.7894	7.44e-10	3.17e-12	1
SYNRG	2.80034	7.47e-10	3.17e-12	1
COPB2	2.76625	7.81e-10	3.37e-12	1
GCA	2.77316	8.91e-10	3.88e-12	1
IKZF2	2.849	8.93e-10	3.92e-12	1
HEATR5B	2.73299	1.02e-09	4.51e-12	1
CRYZ	2.72035	1.07e-09	4.75e-12	1
ELP3	2.70709	1.15e-09	5.13e-12	1
COA3	2.76319	1.21e-09	5.43e-12	1
C11orf54	2.68456	1.23e-09	5.57e-12	1
ATP11C	2.72035	1.44e-09	6.62e-12	1
DYNC1I2	2.71003	1.56e-09	7.24e-12	1
POLR1B	2.73523	1.59e-09	7.4e-12	1
ZC3H13	2.66383	1.76e-09	8.32e-12	1
ZNF573	2.7027	1.82e-09	8.68e-12	1
C14orf119	2.6738	1.85e-09	8.88e-12	1
LRIF1	2.68312	1.97e-09	9.51e-12	1
METTL7A	2.68601	2.19e-09	1.08e-11	1
APPBP2	2.68168	2.2e-09	1.09e-11	1
MS4A6A	2.67165	2.21e-09	1.09e-11	1
FAM126A	2.68817	2.22e-09	1.11e-11	1
SAMHD1	2.70343	2.31e-09	1.17e-11	1
RACGAP1	2.65675	3.05e-09	1.6e-11	1
GVINP1	2.67738	3.05e-09	1.57e-11	1
ATP6V1C1	2.68168	3.05e-09	1.58e-11	1
LNPEP	2.64061	3.06e-09	1.59e-11	1
P2RY14	2.62123	3.06e-09	1.6e-11	1
NHLRC3	2.62536	3.21e-09	1.7e-11	1
RECQL	2.6448	3.27e-09	1.74e-11	1
TBCK	2.66241	3.45e-09	1.87e-11	1
P2RY12	2.58065	3.46e-09	1.86e-11	1
TMEM106A	2.6441	3.5e-09	1.9e-11	1
SAP30L	2.68528	3.64e-09	2.01e-11	1
ZNF146	2.62398	3.65e-09	2e-11	1
ATF1	2.65182	3.67e-09	2.03e-11	1
NLRC4	2.61506	4.1e-09	2.34e-11	1
ASF1A	2.65182	4.12e-09	2.34e-11	1
MIB1	2.66809	4.13e-09	2.37e-11	1
SLC16A7	2.63227	4.16e-09	2.41e-11	1
PYHIN1	2.57931	4.16e-09	2.39e-11	1
DCK	2.63435	4.25e-09	2.47e-11	1
SUCLA2	2.58866	4.25e-09	2.46e-11	1
RNF20	2.6178	4.29e-09	2.51e-11	1
ERCC6L2	2.61097	4.4e-09	2.6e-11	1
TFEC	2.62123	4.48e-09	2.65e-11	1
IFI16	2.59808	4.64e-09	2.78e-11	1
SMC1A	2.58398	4.67e-09	2.81e-11	1
TP53	2.59538	4.67e-09	2.84e-11	1
OIP5-AS1	2.60078	4.8e-09	2.93e-11	1
MCTP1	2.59403	4.88e-09	2.98e-11	1
DCAF7	2.59605	4.9e-09	3.02e-11	1
FGD2	2.62743	5.22e-09	3.23e-11	1
NEXN	2.62743	5.25e-09	3.26e-11	1
TMEM176B	2.3546	5.62e-09	3.52e-11	1
MKKS	2.62123	5.73e-09	3.61e-11	1
SPOP	2.57732	6.09e-09	3.86e-11	1
CBR4	2.62055	6.1e-09	3.88e-11	1
TLR4	2.55363	6.52e-09	4.16e-11	1
TOMM5	2.54323	7.23e-09	4.63e-11	1
DPYD	2.56542	7.34e-09	4.73e-11	1
STAT1	2.58465	8e-09	5.17e-11	1
DAAM1	2.59403	8.19e-09	5.33e-11	1
LCORL	2.54972	8.47e-09	5.55e-11	1
TRG-AS1	2.54972	8.6e-09	5.68e-11	1
RHOT1	2.52334	8.69e-09	5.78e-11	1
DNAJC24	2.52398	8.71e-09	5.78e-11	1
VNN1	2.45519	8.87e-09	5.95e-11	1
OSGEPL1	2.54712	8.89e-09	5.93e-11	1
TMEM35B	2.54972	9.25e-09	6.22e-11	1
TRIM14	2.57998	9.98e-09	6.89e-11	1
GTF2H3	2.61097	9.99e-09	6.86e-11	1
SOS1	2.51193	1.04e-08	7.25e-11	1
TRMT13	2.59403	1.06e-08	7.4e-11	1
ZNF302	2.52908	1.06e-08	7.44e-11	1
CASP1	2.51889	1.11e-08	7.91e-11	1
MRPL42	2.51383	1.11e-08	7.86e-11	1
PDE7A	2.50376	1.18e-08	8.54e-11	1
BCL11A	2.50815	1.25e-08	9.07e-11	1
PRAG1	2.53229	1.25e-08	9.17e-11	1
DCLRE1C	2.51636	1.26e-08	9.16e-11	1
ATP2B4	2.51826	1.29e-08	9.52e-11	1
PSMB8-AS1	2.53421	1.34e-08	9.98e-11	1
RPE	2.49813	1.38e-08	1.04e-10	1
NEK7	2.49377	1.39e-08	1.05e-10	1
TMEM87B	2.48447	1.49e-08	1.13e-10	1
ICAM2	2.49314	1.49e-08	1.12e-10	1
IKBIP	2.50941	1.51e-08	1.15e-10	1
DOCK9	2.52525	1.51e-08	1.15e-10	1
LOC441242	2.48694	1.53e-08	1.18e-10	1
PHKB	2.50438	1.55e-08	1.19e-10	1
MOSMO	2.52334	1.59e-08	1.24e-10	1
GNB4	2.49128	1.62e-08	1.27e-10	1
RCSD1	2.52781	1.71e-08	1.35e-10	1
SATB1	2.49128	1.85e-08	1.47e-10	1
SLC15A2	2.49563	1.9e-08	1.52e-10	1
BLNK	2.48324	2.15e-08	1.72e-10	1
GPR171	2.50627	2.18e-08	1.77e-10	1
NUMB	2.47463	2.18e-08	1.75e-10	1
GBP3	2.48385	2.22e-08	1.81e-10	1
TRMT1L	2.4667	2.23e-08	1.83e-10	1
VPS35	2.47219	2.24e-08	1.85e-10	1
NBR1	2.43309	2.24e-08	1.83e-10	1
UMAD1	2.43368	2.42e-08	2.03e-10	1
CRIM1	2.48324	2.51e-08	2.11e-10	1
FAM118B	2.46853	2.54e-08	2.16e-10	1
PPA2	2.42189	2.63e-08	2.24e-10	1
PTGDR	2.42601	2.7e-08	2.31e-10	1
MESD	2.44141	2.74e-08	2.36e-10	1
STRBP	2.45459	2.76e-08	2.39e-10	1
CREBZF	2.40211	2.82e-08	2.45e-10	1
GTF2H5	2.44439	2.87e-08	2.51e-10	1
TRAPPC6B	2.43132	2.87e-08	2.53e-10	1
ST6GAL1	2.44141	2.88e-08	2.54e-10	1
CARD8	2.48324	2.96e-08	2.63e-10	1
DYNLL1	2.43487	3.08e-08	2.78e-10	1
YIPF4	2.45459	3.2e-08	2.89e-10	1
STX7	2.43605	3.23e-08	2.93e-10	1
ZNF148	2.41721	3.28e-08	2.99e-10	1
SNTB2	2.45881	3.34e-08	3.05e-10	1
PWAR6	2.41371	3.37e-08	3.08e-10	1
NACC2	2.41838	3.44e-08	3.16e-10	1
FUNDC1	2.41896	3.55e-08	3.27e-10	1
SLC25A40	2.43427	3.66e-08	3.38e-10	1
ZNF518A	2.442	3.89e-08	3.63e-10	1
DTX3L	2.39923	3.92e-08	3.67e-10	1
SESTD1	2.36798	3.97e-08	3.73e-10	1
SDHAF3	2.39464	4.38e-08	4.15e-10	1
TMEM251	2.26809	4.78e-08	4.54e-10	1
ZKSCAN1	2.43132	5.05e-08	4.81e-10	1
ITPRIPL2	2.36911	5.08e-08	4.85e-10	1
GTF2H1	2.40616	5.09e-08	4.89e-10	1
GOPC	2.39349	5.12e-08	4.93e-10	1
AATBC	2.38265	5.23e-08	5.08e-10	1
NNT-AS1	2.38777	5.24e-08	5.07e-10	1
POT1	2.37079	5.25e-08	5.07e-10	1
DLEU2	2.43902	5.41e-08	5.29e-10	1
CPSF2	2.35128	5.42e-08	5.28e-10	1
TXNDC9	2.36463	5.59e-08	5.49e-10	1
DENND2D	2.38209	5.72e-08	5.66e-10	1
SMCO4	2.3855	5.72e-08	5.65e-10	1
ACTR3	2.36911	6.07e-08	6.02e-10	1
MFSD8	2.4079	6.08e-08	6.05e-10	1
IL17RA	2.39751	6.13e-08	6.11e-10	1
CARNMT1	2.36239	6.78e-08	6.82e-10	1
IPO8	2.37248	6.87e-08	6.94e-10	1
KDSR	2.35738	7.03e-08	7.11e-10	1
BTN3A3	2.35905	7.09e-08	7.18e-10	1
RNF170	2.35905	7.61e-08	7.77e-10	1
NAGK	2.36239	7.62e-08	7.74e-10	1
PHF6	2.37023	7.62e-08	7.77e-10	1
MSH2	2.405	7.74e-08	7.93e-10	1
TMEM165	2.35571	7.81e-08	8.01e-10	1
DCP1B	2.32992	8.24e-08	8.48e-10	1
LILRB1	2.35516	8.43e-08	8.73e-10	1
FASTKD1	2.34412	8.43e-08	8.69e-10	1
XPO1	2.36128	8.47e-08	8.81e-10	1
LARS1	2.3855	8.81e-08	9.23e-10	1
MTIF3	2.35073	9.37e-08	9.89e-10	1
FPGT	2.32288	9.87e-08	1.05e-09	1
PAPOLG	2.32666	1e-07	1.07e-09	1
SP100	2.32721	1.03e-07	1.1e-09	1
NLK	2.33263	1.04e-07	1.11e-09	1
DUSP6	2.35905	1.07e-07	1.15e-09	1
HLTF	2.31911	1.07e-07	1.15e-09	1
NHSL2	2.28938	1.09e-07	1.18e-09	1
FAR2	2.32558	1.09e-07	1.18e-09	1
TLR5	2.33372	1.1e-07	1.2e-09	1
AMMECR1	2.34687	1.11e-07	1.22e-09	1
PF4V1	1.9478	1.19e-07	1.31e-09	1
STEAP4	2.29621	1.2e-07	1.32e-09	1
PREPL	2.30787	1.24e-07	1.38e-09	1
ZNF260	2.32126	1.25e-07	1.37e-09	1
TFCP2	2.3359	1.26e-07	1.4e-09	1
PPP1R21	2.35239	1.27e-07	1.42e-09	1
PIN4	2.33754	1.4e-07	1.58e-09	1
GLT8D1	2.33318	1.42e-07	1.6e-09	1
ERMP1	2.30894	1.44e-07	1.64e-09	1
DNAJC13	2.29095	1.48e-07	1.68e-09	1
SETDB2	2.31589	1.56e-07	1.78e-09	1
SPCS2	2.31107	1.56e-07	1.78e-09	1
MINPP1	2.27946	1.6e-07	1.84e-09	1
TASOR	2.34192	1.69e-07	1.95e-09	1
NUP43	2.26963	1.77e-07	2.04e-09	1
IFIT3	2.10837	1.87e-07	2.18e-09	1
TNFAIP8L2	2.26091	1.88e-07	2.2e-09	1
XRCC4	2.26142	1.93e-07	2.27e-09	1
FCRL3	2.24467	1.94e-07	2.29e-09	1
KPNB1	2.25327	1.99e-07	2.35e-09	1
SKA2	2.27998	2.11e-07	2.49e-09	1
SKAP2	2.26912	2.16e-07	2.57e-09	1
CDC14A	2.27687	2.16e-07	2.56e-09	1
PCMTD1	2.31642	2.34e-07	2.79e-09	1
MITD1	2.29991	2.36e-07	2.82e-09	1
UTP14C	2.29095	2.45e-07	2.94e-09	1
CLOCK	2.23964	2.47e-07	2.98e-09	1
C2orf68	2.29305	2.58e-07	3.11e-09	1
FAM111A-DT	2.23514	2.61e-07	3.16e-09	1
NOC3L	2.24669	2.63e-07	3.2e-09	1
PTPN6	2.26193	2.64e-07	3.22e-09	1
PBRM1	2.27015	2.66e-07	3.25e-09	1
GIN1	2.21386	2.66e-07	3.25e-09	1
CWC27	2.25989	2.92e-07	3.6e-09	1
KATNBL1	2.16403	3.11e-07	3.85e-09	1
CYB5B	2.23964	3.16e-07	3.91e-09	1
LINC01410	2.27687	3.19e-07	3.96e-09	1
SUGT1	2.23115	3.26e-07	4.06e-09	1
PDLIM5	2.31911	3.31e-07	4.13e-09	1
SLF2	2.25683	3.33e-07	4.17e-09	1
MPEG1	2.25887	3.51e-07	4.42e-09	1
KLHL6	2.24065	3.63e-07	4.6e-09	1
MRPS28	2.20556	3.76e-07	4.79e-09	1
ATP6V1D	2.24014	3.86e-07	4.94e-09	1
CEP78	2.23714	4.02e-07	5.17e-09	1
TAF4	2.20264	4.08e-07	5.26e-09	1
ARL11	2.22717	4.08e-07	5.25e-09	1
PTEN	2.20799	4.1e-07	5.29e-09	1
VPS45	2.24316	4.22e-07	5.47e-09	1
RAB28	2.20264	4.23e-07	5.47e-09	1
CHD9	2.22469	4.27e-07	5.55e-09	1
CLEC12A	2.2119	4.32e-07	5.62e-09	1
MOSPD2	2.21779	4.34e-07	5.65e-09	1
APBB1IP	2.21582	4.41e-07	5.76e-09	1
NIF3L1	2.19684	4.42e-07	5.8e-09	1
PHAX	2.21729	4.44e-07	5.83e-09	1
EDEM3	2.22025	4.49e-07	5.9e-09	1
HOOK3	2.19829	4.68e-07	6.24e-09	1
ZNF678	2.20167	4.78e-07	6.39e-09	1
TRPS1	2.19925	4.89e-07	6.55e-09	1
GOLPH3L	2.22222	4.9e-07	6.55e-09	1
COMMD8	2.20848	4.95e-07	6.65e-09	1
TBL1XR1	2.20361	5.02e-07	6.79e-09	1
SHQ1	2.18627	5.11e-07	6.92e-09	1
IGIP	2.19829	5.2e-07	7.06e-09	1
TRERF1	2.17581	5.36e-07	7.29e-09	1
COG6	2.23214	5.44e-07	7.43e-09	1
SHPRH	2.21288	5.5e-07	7.53e-09	1
PTGER2	2.23214	5.53e-07	7.59e-09	1
TMEM106B	2.2119	5.54e-07	7.62e-09	1
SRGAP2	2.17391	5.55e-07	7.66e-09	1
NRG1	2.18103	5.56e-07	7.66e-09	1
SNX1	2.19684	5.6e-07	7.74e-09	1
KLHL8	2.21533	5.6e-07	7.75e-09	1
SLC30A6	2.23115	5.61e-07	7.78e-09	1
LARP4B	2.21288	5.67e-07	7.88e-09	1
ACSL6	2.19058	5.8e-07	8.07e-09	1
NFYB	2.18675	5.8e-07	8.09e-09	1
OGG1	2.18675	5.91e-07	8.25e-09	1
TEP1	2.18007	6.28e-07	8.81e-09	1
PRKAR1A	2.17297	6.29e-07	8.84e-09	1
BAZ1A	2.17486	6.57e-07	9.29e-09	1
ZNF37BP	2.17297	6.73e-07	9.54e-09	1
MDM1	2.20022	7.11e-07	1.03e-08	1
STAMBP	2.19298	7.12e-07	1.03e-08	1
PDHB	2.17533	7.14e-07	1.03e-08	1
TAOK1	2.18579	7.22e-07	1.05e-08	1
MRPL19	2.18245	7.24e-07	1.05e-08	1
MSRB1	2.12675	7.34e-07	1.07e-08	1
ZNF226	2.18198	7.42e-07	1.08e-08	1
SELPLG	2.13858	7.57e-07	1.11e-08	1
STK38	2.17628	7.68e-07	1.13e-08	1
ATG4C	2.151	7.68e-07	1.13e-08	1
RAB27A	2.20848	7.93e-07	1.17e-08	1
INPP4B	2.20702	8.03e-07	1.19e-08	1
GPALPP1	2.19684	8.04e-07	1.19e-08	1
AGL	2.15703	8.1e-07	1.2e-08	1
C2orf74	2.17439	8.12e-07	1.21e-08	1
SLAMF7	2.15657	8.53e-07	1.27e-08	1
GUSBP14	2.17061	8.56e-07	1.28e-08	1
CBX1	2.17014	8.57e-07	1.28e-08	1
IFNAR1	2.15889	8.77e-07	1.32e-08	1
TRNT1	2.14638	8.85e-07	1.34e-08	1
STK39	2.16497	8.86e-07	1.34e-08	1
SPRING1	2.14133	9.12e-07	1.38e-08	1
LRCH3	2.18962	9.39e-07	1.43e-08	1
RTN1	2.07168	9.51e-07	1.45e-08	1
RAD50	2.12675	9.59e-07	1.46e-08	1
YWHAB	2.11864	9.67e-07	1.48e-08	1
SLC25A46	2.15285	9.82e-07	1.51e-08	1
LY75	2.16497	9.93e-07	1.52e-08	1
IFIT1	2.11595	1.01e-06	1.56e-08	1
TMCC1	2.13538	1.03e-06	1.58e-08	1
CAMK2G	2.12134	1.03e-06	1.6e-08	1
CRYZL1	2.14961	1.05e-06	1.63e-08	1
UBTD2	2.1363	1.08e-06	1.68e-08	1
TPT1-AS1	2.1245	1.1e-06	1.72e-08	1
RBM47	2.10837	1.1e-06	1.73e-08	1
PID1	2.14316	1.1e-06	1.72e-08	1
NCOR1	2.12044	1.1e-06	1.71e-08	1
SCYL3	2.13038	1.12e-06	1.76e-08	1
KDM4C	2.14087	1.15e-06	1.81e-08	1
ALDH5A1	2.14041	1.15e-06	1.81e-08	1
RNF14	2.12857	1.16e-06	1.84e-08	1
NUDCD1	2.12947	1.18e-06	1.88e-08	1
SAMD3	2.15239	1.19e-06	1.88e-08	1
TBC1D9	2.11909	1.19e-06	1.89e-08	1
DZIP3	2.12675	1.19e-06	1.89e-08	1
TCF7L2	2.13265	1.21e-06	1.93e-08	1
WDR7	2.1254	1.21e-06	1.92e-08	1
TRIM22	2.16076	1.23e-06	1.98e-08	1
IGSF6	2.11595	1.24e-06	1.99e-08	1
NHLRC2	2.11551	1.31e-06	2.12e-08	1
PTCH1	2.07426	1.31e-06	2.11e-08	1
CSTF2T	2.1182	1.31e-06	2.12e-08	1
TMX3	2.11416	1.34e-06	2.18e-08	1
ICE2	2.15378	1.37e-06	2.23e-08	1
PPM1L	2.12359	1.39e-06	2.28e-08	1
LMBRD2	2.14041	1.4e-06	2.31e-08	1
MAT2B	2.1164	1.47e-06	2.43e-08	1
LOC105369228	2.09074	1.49e-06	2.47e-08	1
TMEM69	2.09074	1.5e-06	2.47e-08	1
FAM98B	2.10704	1.52e-06	2.51e-08	1
ATF7IP	2.10704	1.53e-06	2.54e-08	1
PITPNC1	2.11506	1.54e-06	2.55e-08	1
GART	2.09205	1.54e-06	2.57e-08	1
ABAT	2.13812	1.55e-06	2.59e-08	1
RIN2	2.0829	1.65e-06	2.77e-08	1
ARMC10	2.09776	1.73e-06	2.91e-08	1
GPBP1	2.07943	1.75e-06	2.97e-08	1
IBTK	2.05761	1.75e-06	2.96e-08	1
NEK4	2.08551	1.79e-06	3.04e-08	1
CASP6	2.11685	1.8e-06	3.05e-08	1
CNOT6	2.08812	1.84e-06	3.13e-08	1
PIK3C3	2.0903	1.87e-06	3.18e-08	1
RAB27B	2.10837	1.88e-06	3.21e-08	1
THYN1	2.08899	1.89e-06	3.23e-08	1
TSNAX	2.06356	1.89e-06	3.23e-08	1
XIAP	2.08855	1.91e-06	3.28e-08	1
TNFRSF17	2.09556	1.99e-06	3.43e-08	1
SIRPB2	2.11909	2.06e-06	3.58e-08	1
WNK1	2.08681	2.07e-06	3.58e-08	1
OGFRL1	2.08464	2.12e-06	3.69e-08	1
POLK	2.06612	2.23e-06	3.88e-08	1
TIMMDC1	2.11551	2.29e-06	4e-08	1
FLI1	2.10526	2.3e-06	4.02e-08	1
GPD2	2.07383	2.36e-06	4.14e-08	1
VPS36	2.07684	2.38e-06	4.18e-08	1
METTL18	2.096	2.45e-06	4.3e-08	1
RPAP3	2.05804	2.63e-06	4.63e-08	1
TTC39B	2.06271	2.63e-06	4.64e-08	1
LNPK	2.12721	2.63e-06	4.65e-08	1
FAM114A2	2.05973	2.66e-06	4.73e-08	1
FAM13A	2.08681	2.66e-06	4.71e-08	1
COQ5	2.07727	2.68e-06	4.78e-08	1
ARL15	2.05044	2.69e-06	4.79e-08	1
CREB5	2.06996	2.76e-06	4.94e-08	1
FCN1	2.07555	2.84e-06	5.08e-08	1
NADK	2.09776	2.84e-06	5.12e-08	1
PPP3CA	2.03832	2.86e-06	5.15e-08	1
PUS7L	2.04541	2.86e-06	5.17e-08	1
SCLT1	2.06484	2.92e-06	5.28e-08	1
NUDT5	2.04666	3.02e-06	5.47e-08	1
PLPBP	2.07383	3.07e-06	5.58e-08	1
PRMT5	2.07641	3.1e-06	5.65e-08	1
IPCEF1	2.07125	3.15e-06	5.74e-08	1
CMTR2	2.05128	3.2e-06	5.85e-08	1
BTBD7	2.05297	3.27e-06	6e-08	1
NSL1	2.06398	3.28e-06	6.03e-08	1
HIKESHI	2.0803	3.29e-06	6.03e-08	1
AKT3	2.05719	3.31e-06	6.09e-08	1
LBH	2.03832	3.32e-06	6.12e-08	1
TET2	2.04165	3.37e-06	6.21e-08	1
RBM41	2.05255	3.38e-06	6.24e-08	1
CD24	2.03169	3.38e-06	6.24e-08	1
ARHGEF3	2.03832	3.39e-06	6.27e-08	1
UBE2L3	2.03293	3.42e-06	6.35e-08	1
SACS	2.03211	3.55e-06	6.61e-08	1
MRPL51	2.03252	3.65e-06	6.81e-08	1
MRS2	2.06016	3.66e-06	6.83e-08	1
ESYT1	2.07727	3.71e-06	6.93e-08	1
NDUFA8	2.04332	3.71e-06	6.94e-08	1
FBXW2	2.03583	3.76e-06	7.06e-08	1
FBXO22	2.035	3.87e-06	7.29e-08	1
TMEM19	2.01857	3.89e-06	7.36e-08	1
CXCL5	1.66778	3.98e-06	7.56e-08	1
IQGAP1	2.04708	3.98e-06	7.55e-08	1
RSAD2	2.15378	3.99e-06	7.58e-08	1
TNRC6B	2.03087	3.99e-06	7.59e-08	1
LRIG2	2.03293	3.99e-06	7.6e-08	1
SREK1IP1	2.02675	4.08e-06	7.78e-08	1
DR1	2.03874	4.15e-06	7.95e-08	1
CYB5A	2.03169	4.18e-06	8.01e-08	1
GTF2E1	2.01654	4.21e-06	8.09e-08	1
NAIP	2.03211	4.29e-06	8.25e-08	1
EAF2	2.0429	4.3e-06	8.29e-08	1
PHF21A	2.0202	4.4e-06	8.5e-08	1
CHROMR	2.01939	4.47e-06	8.66e-08	1
EVI5	2.03957	4.49e-06	8.71e-08	1
NSF	2.0024	4.5e-06	8.75e-08	1
PLAC8	2.04583	4.52e-06	8.78e-08	1
MGC70870	2.01248	4.52e-06	8.81e-08	1
CSF1R	2.05002	4.58e-06	8.95e-08	1
IL27RA	1.9988	4.61e-06	9.01e-08	1
SMIM30	2.01572	4.61e-06	9.02e-08	1
PCNA	2.04625	4.63e-06	9.09e-08	1
MGAT2	2.03583	4.76e-06	9.37e-08	1
CLCN3	2.02552	4.81e-06	9.48e-08	1
CALHM2	2.00803	4.92e-06	9.73e-08	1
HCK	2.0404	4.98e-06	9.89e-08	1
SPTSSA	2.02881	5.1e-06	1.02e-07	1
LOC100505549	2.00682	5.12e-06	1.02e-07	1
COMMD10	2.03252	5.16e-06	1.03e-07	1
PCNX4	2.00844	5.17e-06	1.03e-07	1
LIN37	2.02347	5.21e-06	1.04e-07	1
CPOX	2.03046	5.21e-06	1.05e-07	1
MRPS18C	1.99601	5.21e-06	1.05e-07	1
C15orf40	2.0024	5.24e-06	1.06e-07	1
CKMT2-AS1	2.00321	5.24e-06	1.06e-07	1
KIAA0040	2.00965	5.34e-06	1.08e-07	1
ANKRD17	2.01045	5.41e-06	1.1e-07	1
IL7R	2.0247	5.6e-06	1.14e-07	1
CCDC126	1.99442	5.88e-06	1.2e-07	1
USO1	1.9992	5.97e-06	1.22e-07	1
SCOC	2.00562	6.04e-06	1.24e-07	1
SLC8A1	2.01735	6.04e-06	1.24e-07	1
MPLKIP	2.00924	6.05e-06	1.24e-07	1
SASH1	1.96734	6.2e-06	1.28e-07	1
PARP9	2.01654	6.2e-06	1.28e-07	1
PWWP2A	1.98216	6.21e-06	1.28e-07	1
ATL3	1.99203	6.23e-06	1.29e-07	1
CLN5	2.00763	6.26e-06	1.29e-07	1
DARS1	1.98373	6.26e-06	1.3e-07	1
VTA1	2.002	6.28e-06	1.3e-07	1
BCL2	2.02429	6.34e-06	1.32e-07	1
AP4E1	1.99561	6.41e-06	1.33e-07	1
CKLF	2.01207	6.51e-06	1.35e-07	1
PEX3	1.99045	6.53e-06	1.36e-07	1
FAHD1	1.98452	6.53e-06	1.36e-07	1
MRPL20	1.99362	6.65e-06	1.39e-07	1
MS4A7	1.99322	6.84e-06	1.44e-07	1
CD79B	2.00844	6.84e-06	1.43e-07	1
WDR36	1.99283	6.85e-06	1.44e-07	1
SAC3D1	1.97668	6.91e-06	1.45e-07	1
TBC1D31	1.9802	6.93e-06	1.46e-07	1
MIA2	1.99362	7.07e-06	1.49e-07	1
ZCCHC7	2.02552	7.11e-06	1.5e-07	1
THOC2	1.99362	7.31e-06	1.55e-07	1
SWAP70	1.99481	7.31e-06	1.55e-07	1
ZNF322	1.98373	7.34e-06	1.56e-07	1
RALA	1.96464	7.68e-06	1.64e-07	1
C5orf51	1.95925	7.72e-06	1.65e-07	1
ARSD	1.98847	7.76e-06	1.66e-07	1
SNAPC3	1.99561	7.81e-06	1.67e-07	1
CDK6	1.96155	7.82e-06	1.68e-07	1
ABHD18	1.97668	7.83e-06	1.68e-07	1
PEX11B	1.97511	8.03e-06	1.73e-07	1
CHST15	1.97824	8.04e-06	1.73e-07	1
TRAPPC12	2.00602	8.16e-06	1.76e-07	1
PIGF	1.98216	8.16e-06	1.76e-07	1
TRAT1	1.94137	8.23e-06	1.78e-07	1
GPR155	1.97355	8.23e-06	1.78e-07	1
NMT1	1.96541	8.29e-06	1.8e-07	1
MX1	2.06143	8.34e-06	1.81e-07	1
CSTF3	1.97433	8.39e-06	1.82e-07	1
DOCK10	2.01572	8.49e-06	1.85e-07	1
SYK	1.94666	8.58e-06	1.87e-07	1
ALDH6A1	2.0024	8.59e-06	1.88e-07	1
SCRN3	1.97239	8.63e-06	1.89e-07	1
EXOC5	1.97161	8.66e-06	1.9e-07	1
LPCAT2	1.93686	8.67e-06	1.9e-07	1
KIAA1143	1.96078	8.67e-06	1.9e-07	1
ZFP64	1.95656	8.74e-06	1.92e-07	1
MFSD4B	1.95771	8.75e-06	1.93e-07	1
SLC46A2	1.95848	8.76e-06	1.93e-07	1
IFI44L	2.0496	8.77e-06	1.93e-07	1
AASDHPPT	1.95925	9.11e-06	2.02e-07	1
ARPC5	1.9604	9.13e-06	2.03e-07	1
KLHDC10	1.97122	9.32e-06	2.08e-07	1
PM20D2	1.96657	9.47e-06	2.12e-07	1
DPY30	1.97511	9.52e-06	2.13e-07	1
A2M-AS1	1.92049	9.62e-06	2.15e-07	1
C1RL	1.9802	9.65e-06	2.16e-07	1
UBR1	1.97083	9.72e-06	2.18e-07	1
UBN2	1.97511	9.99e-06	2.25e-07	1
PARP11	1.95886	1.05e-05	2.37e-07	1
TMCO1	1.95046	1.05e-05	2.39e-07	1
TTF2	1.95465	1.05e-05	2.38e-07	1
VPS13A	1.97239	1.06e-05	2.4e-07	1
CISD1	1.95351	1.06e-05	2.42e-07	1
RSF1	1.9516	1.09e-05	2.48e-07	1
GRK3	1.94553	1.09e-05	2.49e-07	1
CTR9	1.9459	1.11e-05	2.56e-07	1
TTC37	1.97006	1.11e-05	2.54e-07	1
NIPAL3	1.96657	1.12e-05	2.57e-07	1
CRYBG3	1.93798	1.12e-05	2.57e-07	1
OPTN	1.96967	1.12e-05	2.59e-07	1
BRD8	1.96078	1.14e-05	2.62e-07	1
GLS	1.96386	1.15e-05	2.66e-07	1
LYST	1.93986	1.19e-05	2.76e-07	1
FBXO9	1.95084	1.2e-05	2.78e-07	1
ARHGAP30	1.94439	1.21e-05	2.82e-07	1
GMPS	1.94288	1.21e-05	2.81e-07	1
HPSE	1.92493	1.23e-05	2.88e-07	1
IFT74	1.95465	1.24e-05	2.91e-07	1
AGPAT5	1.92086	1.24e-05	2.89e-07	1
PURA	1.95313	1.26e-05	2.96e-07	1
MRPS18B	1.95198	1.27e-05	2.98e-07	1
ALDH18A1	1.98216	1.27e-05	2.99e-07	1
TMOD3	1.9516	1.27e-05	2.97e-07	1
TIPRL	1.93498	1.28e-05	3.03e-07	1
C11orf80	1.97122	1.3e-05	3.06e-07	1
HDAC9	1.92938	1.31e-05	3.09e-07	1
VAMP4	1.9558	1.31e-05	3.1e-07	1
TBCEL	1.94704	1.33e-05	3.15e-07	1
LIG4	1.94175	1.33e-05	3.17e-07	1
MCM8	1.9425	1.33e-05	3.15e-07	1
BPNT1	1.91975	1.37e-05	3.27e-07	1
DIPK1A	1.95542	1.38e-05	3.31e-07	1
RCBTB1	1.99203	1.42e-05	3.41e-07	1
SP4	1.94024	1.42e-05	3.4e-07	1
ITGA4	1.9755	1.42e-05	3.41e-07	1
IKZF1	1.92678	1.45e-05	3.51e-07	1
UEVLD	1.92382	1.54e-05	3.74e-07	1
MSANTD2	1.94477	1.54e-05	3.76e-07	1
SIRPG	1.93536	1.54e-05	3.75e-07	1
PGM2	1.93761	1.55e-05	3.8e-07	1
PSMB9	1.95198	1.55e-05	3.81e-07	1
MPHOSPH8	1.92753	1.55e-05	3.8e-07	1
SLCO4C1	1.92086	1.57e-05	3.87e-07	1
UBASH3B	1.90767	1.57e-05	3.86e-07	1
ZNF514	1.92456	1.62e-05	3.99e-07	1
ATF6	1.91975	1.63e-05	4.02e-07	1
ZNF277	1.90367	1.63e-05	4.02e-07	1
NFE2	1.92827	1.65e-05	4.09e-07	1
GBP4	1.91865	1.69e-05	4.19e-07	1
MINDY2	1.86532	1.73e-05	4.3e-07	1
CREBL2	1.94477	1.75e-05	4.35e-07	1
DNAJC16	1.91571	1.75e-05	4.34e-07	1
RPRD1A	1.93723	1.76e-05	4.39e-07	1
DHRS4-AS1	1.95084	1.76e-05	4.39e-07	1
LINC00324	1.92493	1.77e-05	4.42e-07	1
CEP350	1.90331	1.78e-05	4.46e-07	1
ANKFY1	1.92753	1.86e-05	4.67e-07	1
ABRACL	1.92271	1.86e-05	4.68e-07	1
RPA4	1.88786	1.87e-05	4.7e-07	1
LDAH	1.92976	1.89e-05	4.76e-07	1
TNFAIP8	1.90803	1.89e-05	4.77e-07	1
PRR11	1.92382	1.91e-05	4.84e-07	1
SP110	1.90585	1.93e-05	4.9e-07	1
FAM3C	1.89934	1.94e-05	4.93e-07	1
JPX	1.9044	1.95e-05	4.95e-07	1
MTO1	1.89466	1.95e-05	4.95e-07	1
KLF12	1.90767	1.96e-05	5.01e-07	1
WDR3	1.91424	1.96e-05	5e-07	1
SMC2	1.90331	1.96e-05	5.02e-07	1
KRBOX5	1.94137	1.97e-05	5.04e-07	1
FCRLA	1.83587	2.08e-05	5.37e-07	1
KMO	1.90949	2.08e-05	5.35e-07	1
ADCY7	1.88005	2.1e-05	5.41e-07	1
ZNF512	1.89825	2.13e-05	5.49e-07	1
RCBTB2	1.91168	2.14e-05	5.53e-07	1
LCLAT1	1.90404	2.17e-05	5.62e-07	1
PDHX	1.90295	2.24e-05	5.82e-07	1
SLC46A3	1.90694	2.29e-05	5.98e-07	1
TMEM218	1.89358	2.29e-05	5.98e-07	1
BLZF1	1.89573	2.3e-05	5.98e-07	1
NSMCE4A	1.88857	2.33e-05	6.07e-07	1
AKR1C3	1.81028	2.33e-05	6.07e-07	1
ANKIB1	1.90367	2.33e-05	6.08e-07	1
VCAN	1.92753	2.41e-05	6.31e-07	1
HPS3	1.9073	2.43e-05	6.39e-07	1
TIAM1	1.88111	2.44e-05	6.43e-07	1
SPG11	1.89394	2.47e-05	6.52e-07	1
AP1AR	1.88608	2.49e-05	6.59e-07	1
RNF13	1.8997	2.51e-05	6.63e-07	1
CACNA2D3	1.86081	2.54e-05	6.74e-07	1
SH2D3C	1.87196	2.55e-05	6.79e-07	1
DDX17	1.62338	2.59e-05	6.89e-07	1
TMEM209	1.92419	2.59e-05	6.9e-07	1
TRIM27	1.87723	2.63e-05	7.01e-07	1
COA4	1.88395	2.64e-05	7.05e-07	1
NUP210	1.87231	2.65e-05	7.1e-07	1
METTL13	1.86706	2.69e-05	7.21e-07	1
RER1	1.88715	2.69e-05	7.22e-07	1
UBASH3A	1.89789	2.69e-05	7.25e-07	1
KLHL42	1.87477	2.7e-05	7.29e-07	1
CCDC22	1.87617	2.73e-05	7.4e-07	1
TRAC	1.87441	2.73e-05	7.41e-07	1
JKAMP	1.86359	2.83e-05	7.7e-07	1
IL6R	1.88893	2.83e-05	7.69e-07	1
ANAPC10	1.88359	2.83e-05	7.68e-07	1
EMG1	1.91865	2.85e-05	7.79e-07	1
MARCKS	1.84196	2.86e-05	7.79e-07	1
CBL	1.9015	2.88e-05	7.86e-07	1
MAF	1.86289	2.89e-05	7.9e-07	1
SLC26A2	1.75408	2.89e-05	7.9e-07	1
FGFR1OP2	1.87582	2.93e-05	8.03e-07	1
FMC1	1.8546	2.97e-05	8.18e-07	1
SH2D1B	1.88644	2.98e-05	8.19e-07	1
KRIT1	1.86951	2.98e-05	8.18e-07	1
UGDH	1.88857	3e-05	8.26e-07	1
VPS72	1.85529	3.05e-05	8.42e-07	1
TRANK1	1.86811	3.14e-05	8.7e-07	1
CENPK	1.69693	3.15e-05	8.73e-07	1
RNF111	1.87441	3.17e-05	8.78e-07	1
STXBP5	1.86602	3.17e-05	8.79e-07	1
PAQR8	1.86463	3.3e-05	9.19e-07	1
BICRAL	1.90803	3.35e-05	9.36e-07	1
ZNF623	1.86741	3.38e-05	9.48e-07	1
POLR3K	1.87266	3.41e-05	9.58e-07	1
ZDHHC16	1.86986	3.42e-05	9.61e-07	1
ROCK2	1.86881	3.43e-05	9.67e-07	1
JAML	1.87196	3.43e-05	9.66e-07	1
COG5	1.89645	3.44e-05	9.66e-07	1
TRAPPC8	1.8615	3.5e-05	9.86e-07	1
MDFIC	1.89645	3.5e-05	9.9e-07	1
CPNE3	1.89573	3.5e-05	9.9e-07	1
AHSA1	1.86916	3.51e-05	9.95e-07	1
MAP3K1	1.84672	3.68e-05	1.04e-06	1
ATP8B2	1.87336	3.69e-05	1.05e-06	1
C21orf91	1.8423	3.74e-05	1.06e-06	1
UNG	1.8498	3.76e-05	1.07e-06	1
ANP32A-IT1	1.77904	3.77e-05	1.07e-06	1
NFATC2	1.8474	3.85e-05	1.1e-06	1
CFAP298	1.83993	3.88e-05	1.11e-06	1
APOBEC3G	1.84094	3.92e-05	1.12e-06	1
ADD3	1.85494	3.92e-05	1.12e-06	1
MFSD14B	1.87652	3.97e-05	1.14e-06	1
ZC3H4	1.84877	3.99e-05	1.14e-06	1
TTI1	1.8615	4.05e-05	1.17e-06	1
LARP4	1.86951	4.05e-05	1.17e-06	1
N4BP2L2	1.5569	4.05e-05	1.16e-06	1
ARRB1	1.86916	4.11e-05	1.19e-06	1
PGM5-AS1	1.85357	4.17e-05	1.21e-06	1
AGPAT3	1.90331	4.19e-05	1.21e-06	1
TRAPPC11	1.83993	4.19e-05	1.22e-06	1
RECK	1.89251	4.19e-05	1.21e-06	1
COX15	1.85805	4.22e-05	1.23e-06	1
VKORC1L1	1.84196	4.22e-05	1.22e-06	1
MRPS14	1.83925	4.24e-05	1.24e-06	1
BMP2K	1.85736	4.26e-05	1.24e-06	1
FCMR	1.87266	4.26e-05	1.25e-06	1
PSEN1	1.82882	4.27e-05	1.25e-06	1
HLA-DRB4	1.36743	4.27e-05	1.26e-06	1
RNASE2	1.86185	4.28e-05	1.26e-06	1
KIDINS220	1.85805	4.29e-05	1.26e-06	1
RNASE6	1.87512	4.29e-05	1.26e-06	1
KLF3-AS1	1.84128	4.34e-05	1.28e-06	1
AVL9	1.79986	4.35e-05	1.28e-06	1
C1GALT1C1	1.83824	4.37e-05	1.3e-06	1
DNAJC10	1.86393	4.37e-05	1.29e-06	1
ATP6V1A	1.82983	4.38e-05	1.3e-06	1
DAB2	1.84196	4.43e-05	1.32e-06	1
SRBD1	1.87056	4.47e-05	1.33e-06	1
CWF19L2	1.84128	4.47e-05	1.33e-06	1
USP28	1.85185	4.47e-05	1.33e-06	1
UCP2	1.88466	4.47e-05	1.33e-06	1
CCR5	1.83385	4.47e-05	1.33e-06	1
ARMC1	1.8423	4.58e-05	1.37e-06	1
PYROXD1	1.83284	4.64e-05	1.39e-06	1
ELOVL7	1.5949	4.64e-05	1.4e-06	1
EVL	1.85219	4.64e-05	1.39e-06	1
NME6	1.84026	4.66e-05	1.4e-06	1
OSTM1	1.85185	4.68e-05	1.41e-06	1
SLC16A3	1.78348	4.72e-05	1.42e-06	1
ESF1	1.8457	4.73e-05	1.43e-06	1
KDM5A	1.82682	4.73e-05	1.43e-06	1
SRFBP1	1.84298	4.74e-05	1.43e-06	1
RBMS1	1.85288	4.75e-05	1.44e-06	1
CD27	1.85288	4.76e-05	1.44e-06	1
HERC6	1.88466	4.76e-05	1.44e-06	1
MYBL1	1.78158	4.79e-05	1.45e-06	1
CHM	1.82882	4.8e-05	1.46e-06	1
CD180	1.82548	4.91e-05	1.5e-06	1
PUDP	1.85839	4.91e-05	1.5e-06	1
SLC24A4	1.83318	5.08e-05	1.56e-06	1
KRBOX4	1.83251	5.12e-05	1.57e-06	1
TFB1M	1.82849	5.15e-05	1.58e-06	1
PRDX3	1.81984	5.16e-05	1.59e-06	1
ATRX	1.80375	5.16e-05	1.58e-06	1
TXLNA	1.8305	5.22e-05	1.61e-06	1
ANTXR2	1.81192	5.28e-05	1.63e-06	1
TPR	1.82582	5.31e-05	1.64e-06	1
FBXL17	1.8622	5.32e-05	1.64e-06	1
TMTC2	1.8093	5.36e-05	1.65e-06	1
CDC42EP3	1.81028	5.36e-05	1.66e-06	1
ACTR6	1.8162	5.43e-05	1.68e-06	1
TMEM63A	1.8305	5.45e-05	1.69e-06	1
BRCC3	1.84502	5.46e-05	1.69e-06	1
SMARCAL1	1.83655	5.5e-05	1.71e-06	1
USP25	1.80278	5.53e-05	1.72e-06	1
TUBD1	1.82815	5.53e-05	1.72e-06	1
AKAP11	1.83284	5.54e-05	1.72e-06	1
BANF1	1.84162	5.56e-05	1.73e-06	1
SF3B3	1.81357	5.59e-05	1.74e-06	1
CEPT1	1.83217	5.68e-05	1.78e-06	1
MANEA	1.83184	5.88e-05	1.84e-06	1
MRM2	1.82282	5.88e-05	1.84e-06	1
HIPK3	1.82183	5.91e-05	1.86e-06	1
SMARCA2	1.85494	5.91e-05	1.86e-06	1
CHMP5	1.85494	5.98e-05	1.88e-06	1
GTF2A1	1.83016	6e-05	1.89e-06	1
EPSTI1	1.86012	6.11e-05	1.93e-06	1
TATDN3	1.7963	6.12e-05	1.93e-06	1
NPTN	1.81028	6.18e-05	1.95e-06	1
CARD6	1.82749	6.26e-05	1.98e-06	1
PRRC1	1.82648	6.36e-05	2.02e-06	1
RPS6KA5	1.8352	6.4e-05	2.03e-06	1
PRR5L	1.81951	6.42e-05	2.04e-06	1
MAVS	1.82782	6.43e-05	2.04e-06	1
GLCCI1	1.81851	6.44e-05	2.05e-06	1
BAIAP2-DT	1.82648	6.51e-05	2.07e-06	1
CORO1A	1.83385	6.54e-05	2.09e-06	1
ADH5	1.83318	6.56e-05	2.09e-06	1
VBP1	1.81554	6.67e-05	2.13e-06	1
PRRG4	1.80278	6.81e-05	2.18e-06	1
GSK3B	1.8577	6.87e-05	2.2e-06	1
ABCF2	1.7934	6.88e-05	2.2e-06	1
CFAP97	1.82715	6.95e-05	2.23e-06	1
HADH	1.8093	7.02e-05	2.26e-06	1
BCAT1	1.76274	7.03e-05	2.26e-06	1
TMTC1	1.81785	7.09e-05	2.28e-06	1
ZBTB44	1.82382	7.1e-05	2.29e-06	1
DBT	1.82183	7.16e-05	2.31e-06	1
ATE1	1.84128	7.24e-05	2.34e-06	1
MED16	1.82849	7.27e-05	2.35e-06	1
ARHGAP26	1.81653	7.34e-05	2.38e-06	1
EMC2	1.80213	7.34e-05	2.38e-06	1
AIDA	1.81422	7.34e-05	2.38e-06	1
SDHD	1.81554	7.47e-05	2.43e-06	1
RAPH1	1.66834	7.49e-05	2.44e-06	1
NCBP3	1.79856	7.52e-05	2.45e-06	1
MCM3	1.80148	7.53e-05	2.45e-06	1
ORC5	1.80343	7.66e-05	2.51e-06	1
CPPED1	1.78891	7.7e-05	2.52e-06	1
GRSF1	1.80473	7.7e-05	2.52e-06	1
TNFSF13B	1.8315	7.73e-05	2.54e-06	1
ACER3	1.79986	7.82e-05	2.57e-06	1
TDRD7	1.81389	7.84e-05	2.58e-06	1
BBS10	1.80701	7.87e-05	2.6e-06	1
ARNT	1.79372	7.92e-05	2.62e-06	1
APC	1.79986	8.03e-05	2.66e-06	1
HMG20A	1.80668	8.06e-05	2.67e-06	1
MYO9A	1.79953	8.13e-05	2.69e-06	1
PCYOX1	1.8018	8.2e-05	2.72e-06	1
DAXX	1.79244	8.2e-05	2.72e-06	1
CD14	1.80701	8.22e-05	2.73e-06	1
STXBP3	1.80213	8.4e-05	2.79e-06	1
SH3KBP1	1.78923	8.43e-05	2.81e-06	1
MTLN	1.77651	8.47e-05	2.83e-06	1
FBLIM1	1.79791	8.47e-05	2.83e-06	1
CARD16	1.80603	8.47e-05	2.82e-06	1
CCR1	1.77904	8.51e-05	2.84e-06	1
AKAP10	1.79083	8.53e-05	2.85e-06	1
HPF1	1.79598	8.56e-05	2.87e-06	1
LPXN	1.80799	8.57e-05	2.87e-06	1
LINC00597	1.76491	8.66e-05	2.91e-06	1
CRIPT	1.7646	8.79e-05	2.96e-06	1
SEC24D	1.78094	8.86e-05	2.99e-06	1
POLR2D	1.77873	8.86e-05	2.99e-06	1
HNMT	1.79372	8.89e-05	3e-06	1
PDCD6IP	1.80571	8.92e-05	3.02e-06	1
RPS27L	1.79147	8.93e-05	3.02e-06	1
TTC17	1.81324	9.03e-05	3.06e-06	1
ACAP2	1.79308	9.09e-05	3.08e-06	1
GLRX	1.79986	9.12e-05	3.09e-06	1
ARL6IP6	1.79695	9.13e-05	3.1e-06	1
PSMC2	1.79308	9.21e-05	3.13e-06	1
GOLGA5	1.79953	9.22e-05	3.13e-06	1
NDUFB3	1.77715	9.22e-05	3.14e-06	1
MYCL	1.78859	9.25e-05	3.15e-06	1
ZNF140	1.79565	9.25e-05	3.15e-06	1
RPA2	1.8005	9.26e-05	3.16e-06	1
SDAD1	1.78317	9.29e-05	3.17e-06	1
ZNF862	1.79662	9.3e-05	3.18e-06	1
TCF12	1.81061	9.39e-05	3.22e-06	1
SLC35E2A	1.82083	9.39e-05	3.22e-06	1
LEF1	1.7854	9.39e-05	3.21e-06	1
CBLL1	1.79662	9.4e-05	3.21e-06	1
TET3	1.80115	9.4e-05	3.22e-06	1
CBFA2T2	1.81521	9.41e-05	3.23e-06	1
FCGR1B	1.81324	9.5e-05	3.27e-06	1
ACYP1	1.80734	9.51e-05	3.27e-06	1
GCNT2	1.77904	9.52e-05	3.28e-06	1
EXOSC3	1.78699	9.59e-05	3.31e-06	1
SYNCRIP	1.80701	9.63e-05	3.33e-06	1
GCSH	1.8031	9.63e-05	3.32e-06	1
MAD1L1	1.81653	9.68e-05	3.34e-06	1
FARSA	1.76647	9.8e-05	3.39e-06	1
CD1D	1.76803	9.83e-05	3.41e-06	1
MRPL27	1.78827	9.87e-05	3.42e-06	1
HS2ST1	1.7934	9.91e-05	3.44e-06	1
CLEC2D	1.79019	9.98e-05	3.47e-06	1
CXCR2	1.64366	0.0001025	3.57e-06	1
ARHGAP18	1.78221	0.0001025	3.57e-06	1
ZNF585A	1.78158	0.0001031	3.59e-06	1
MAPKAPK5	1.78476	0.0001051	3.67e-06	1
CBR1	1.77904	0.0001053	3.68e-06	1
AP5M1	1.77841	0.000106	3.71e-06	1
LMO2	1.7963	0.0001067	3.74e-06	1
NUP160	1.7762	0.0001074	3.77e-06	1
RMI1	1.78253	0.0001075	3.78e-06	1
IFI35	1.82482	0.0001076	3.78e-06	1
ZNF721	1.79404	0.0001086	3.82e-06	1
HOMER1	1.75623	0.0001086	3.82e-06	1
ARHGAP19	1.78571	0.0001106	3.91e-06	1
DIS3L2	1.75932	0.0001106	3.9e-06	1
GDAP1	1.77274	0.0001109	3.92e-06	1
INTS6	1.7618	0.0001111	3.94e-06	1
CHCHD1	1.76087	0.0001111	3.93e-06	1
ATXN3	1.71969	0.0001118	3.97e-06	1
TGFBR1	1.76741	0.0001119	3.97e-06	1
CDK2AP2	1.77999	0.0001122	3.98e-06	1
CSE1L	1.78476	0.0001128	4.01e-06	1
TMOD2	1.78827	0.0001129	4.02e-06	1
TUBGCP3	1.79211	0.000113	4.02e-06	1
SLC4A1AP	1.7696	0.000113	4.02e-06	1
PARP1	1.77746	0.0001132	4.04e-06	1
MLH3	1.56495	0.0001145	4.08e-06	1
LIMD1	1.78859	0.000115	4.11e-06	1
PPP2CB	1.78859	0.0001158	4.14e-06	1
SPAG16	1.78317	0.0001162	4.16e-06	1
KLRF1	1.73581	0.0001166	4.18e-06	1
FYB1	1.75593	0.0001181	4.24e-06	1
PAK1	1.77242	0.0001182	4.24e-06	1
NFATC3	1.72028	0.0001195	4.29e-06	1
PAICS	1.77651	0.0001201	4.32e-06	1
PVRIG	1.76523	0.0001203	4.33e-06	1
WDFY3	1.7696	0.000123	4.43e-06	1
ZNF431	1.76118	0.0001239	4.47e-06	1
MGME1	1.77904	0.0001243	4.49e-06	1
MYLK	1.60694	0.0001244	4.49e-06	1
TCAF1	1.77968	0.0001246	4.5e-06	1
METTL5	1.78031	0.0001248	4.51e-06	1
PRDX4	1.7854	0.0001253	4.53e-06	1
STAP1	1.76741	0.0001265	4.58e-06	1
ATG16L2	1.76429	0.0001266	4.59e-06	1
UBLCP1	1.77715	0.0001276	4.63e-06	1
CNOT4	1.75285	0.0001278	4.64e-06	1
CDCA7L	1.76025	0.0001286	4.67e-06	1
TCF4	1.78126	0.0001293	4.7e-06	1
DIDO1	1.75963	0.0001298	4.72e-06	1
MED11	1.75223	0.0001326	4.83e-06	1
LPAR5	1.7316	0.0001328	4.85e-06	1
NCEH1	1.69033	0.0001329	4.85e-06	1
GZMA	1.72533	0.000134	4.91e-06	1
EIF2S1	1.70445	0.0001342	4.92e-06	1
PHYKPL	1.75162	0.0001348	4.95e-06	1
IPP	1.76835	0.0001359	5e-06	1
NMI	1.75346	0.0001367	5.04e-06	1
CNDP2	1.75531	0.0001368	5.04e-06	1
GUCY1A1	1.71145	0.0001373	5.06e-06	1
ZBTB41	1.76897	0.0001374	5.09e-06	1
MYZAP	1.69262	0.0001375	5.08e-06	1
BFAR	1.74155	0.0001375	5.1e-06	1
ELAVL1	1.75963	0.0001375	5.08e-06	1
ZSCAN29	1.7819	0.0001375	5.09e-06	1
OPN3	1.78731	0.0001385	5.14e-06	1
STX17	1.76772	0.0001398	5.19e-06	1
STAU2	1.76056	0.0001406	5.23e-06	1
PDE4DIP	1.78987	0.0001409	5.25e-06	1
CARF	1.76305	0.0001413	5.28e-06	1
IKBKB	1.75131	0.0001414	5.28e-06	1
SLC25A24	1.75285	0.0001414	5.27e-06	1
GLG1	1.75716	0.0001415	5.29e-06	1
NDUFAF4	1.75285	0.0001417	5.3e-06	1
SLC35B4	1.75994	0.0001419	5.31e-06	1
MRPL18	1.74703	0.0001419	5.31e-06	1
ZC3H14	1.75377	0.0001425	5.34e-06	1
IDE	1.73732	0.0001426	5.35e-06	1
CCDC82	1.76678	0.0001442	5.43e-06	1
IFT80	1.78348	0.0001447	5.45e-06	1
TRUB1	1.75747	0.0001451	5.48e-06	1
TRIP4	1.73551	0.0001451	5.48e-06	1
SLC4A7	1.75285	0.0001457	5.51e-06	1
ARL6IP5	1.75439	0.0001464	5.54e-06	1
IKZF3	1.74886	0.0001473	5.59e-06	1
ZSWIM6	1.71292	0.0001474	5.59e-06	1
CRLS1	1.75439	0.0001475	5.6e-06	1
TXNDC15	1.74398	0.0001483	5.64e-06	1
GEMIN5	1.74581	0.0001488	5.66e-06	1
RAB3GAP1	1.75039	0.0001521	5.79e-06	1
GIT2	1.76025	0.0001529	5.82e-06	1
CYBRD1	1.70039	0.000154	5.87e-06	1
EPS15	1.7618	0.0001547	5.91e-06	1
YWHAG	1.731	0.0001548	5.91e-06	1
LOC105375218	1.75162	0.000155	5.93e-06	1
ALDH1A1	1.6952	0.0001566	6e-06	1
KIAA2026	1.74459	0.0001582	6.09e-06	1
ADAM10	1.78571	0.0001583	6.08e-06	1
ORC2	1.76991	0.0001597	6.15e-06	1
LBR	1.7507	0.00016	6.17e-06	1
DTD2	1.73883	0.0001601	6.17e-06	1
METTL21A	1.76554	0.0001625	6.27e-06	1
AZI2	1.74978	0.0001626	6.28e-06	1
SLC5A3	1.77117	0.0001635	6.32e-06	1
PRKXP1	1.75531	0.0001646	6.37e-06	1
MAST4	1.74155	0.000165	6.41e-06	1
C12orf4	1.7331	0.0001661	6.45e-06	1
CAP1	1.74551	0.0001665	6.47e-06	1
GIGYF2	1.74398	0.0001674	6.51e-06	1
HVCN1	1.73822	0.0001685	6.56e-06	1
NAPEPLD	1.75747	0.0001691	6.59e-06	1
BUB3	1.7328	0.0001703	6.64e-06	1
POLD3	1.72921	0.0001705	6.66e-06	1
DPYSL2	1.73551	0.0001705	6.66e-06	1
CNOT1	1.7337	0.0001743	6.83e-06	1
DFFB	1.75039	0.0001753	6.87e-06	1
MRFAP1L1	1.74095	0.0001755	6.88e-06	1
RAB22A	1.72861	0.0001757	6.9e-06	1
WDSUB1	1.74672	0.000176	6.91e-06	1
BDP1	1.74246	0.000176	6.91e-06	1
UBR3	1.74246	0.0001766	6.94e-06	1
SLC27A3	1.74246	0.0001769	6.96e-06	1
GGCX	1.73732	0.0001791	7.05e-06	1
KANSL1L	1.76274	0.0001797	7.09e-06	1
MAP2K4	1.7316	0.0001812	7.15e-06	1
TRIP12	1.7507	0.0001816	7.18e-06	1
ADGRG1	1.67252	0.0001829	7.23e-06	1
SEC23B	1.7452	0.0001858	7.36e-06	1
DCAF13	1.72652	0.0001858	7.37e-06	1
FRMD3	1.68095	0.0001892	7.51e-06	1
PSMA5	1.72325	0.0001911	7.59e-06	1
EBNA1BP2	1.75131	0.0001912	7.6e-06	1
HMGN4	1.74948	0.0001913	7.61e-06	1
TRIP11	1.74581	0.0001917	7.63e-06	1
C2orf76	1.72771	0.0001989	7.93e-06	1
NUDT16	1.7328	0.0001996	7.96e-06	1
NMT2	1.74581	0.0002004	8e-06	1
LCK	1.76367	0.0002011	8.03e-06	1
ACSL5	1.77117	0.0002011	8.03e-06	1
UBA3	1.73521	0.000203	8.11e-06	1
EPG5	1.72473	0.0002049	8.2e-06	1
DLG1	1.74672	0.0002055	8.23e-06	1
CCDC90B	1.7307	0.0002097	8.41e-06	1
SPX	1.34825	0.0002099	8.41e-06	1
RSPRY1	1.70416	0.0002112	8.48e-06	1
STYX	1.73762	0.0002115	8.5e-06	1
TK2	1.72741	0.0002116	8.5e-06	1
RESF1	1.73581	0.0002146	8.63e-06	1
LAMP2	1.71057	0.0002188	8.8e-06	1
ATP9B	1.71556	0.0002192	8.82e-06	1
PRKDC	1.71057	0.0002202	8.88e-06	1
ATP6V0E1	1.72563	0.0002212	8.93e-06	1
TIMM8B	1.70823	0.0002212	8.93e-06	1
MX2	1.76897	0.0002222	8.98e-06	1
CTSC	1.72801	0.0002231	9.04e-06	1
TRAK2	1.73913	0.0002245	9.11e-06	1
AIM2	1.73822	0.0002258	9.17e-06	1
CNIH4	1.69808	0.0002286	9.29e-06	1
TTC33	1.69837	0.0002302	9.37e-06	1
ATM	1.66611	0.0002309	9.4e-06	1
RPP40	1.72384	0.0002321	9.47e-06	1
NCAPD2	1.74338	0.0002322	9.46e-06	1
HNRNPR	1.71969	0.0002323	9.49e-06	1
SRI	1.70387	0.0002338	9.56e-06	1
KLHL9	1.73611	0.0002384	9.77e-06	1
S100A11	1.71762	0.0002384	9.76e-06	1
VPS50	1.72265	0.0002397	9.84e-06	1
STK3	1.72771	0.0002431	9.99e-06	1
RTP4	1.71939	0.0002444	1.01e-05	1
SERBP1	1.71174	0.000251	1.04e-05	1
ECI2	1.72265	0.000251	1.04e-05	1
PHBP19	1.71262	0.0002541	1.05e-05	1
FAM120A	1.73913	0.0002568	1.06e-05	1
FARSB	1.71851	0.0002598	1.08e-05	1
NUP37	1.7059	0.00026	1.08e-05	1
TRIT1	1.7191	0.000264	1.1e-05	1
MBLAC2	1.69866	0.0002646	1.1e-05	1
RSBN1	1.71585	0.0002656	1.11e-05	1
LYPLAL1	1.74307	0.0002664	1.11e-05	1
ASAP1-IT2	1.70271	0.0002665	1.11e-05	1
TRIQK	1.70853	0.0002677	1.12e-05	1
ZNF75D	1.71204	0.0002679	1.12e-05	1
LXN	1.70503	0.0002685	1.12e-05	1
PSMD1	1.70765	0.0002706	1.13e-05	1
KBTBD7	1.68748	0.0002717	1.14e-05	1
RBM12B	1.703	0.0002727	1.14e-05	1
BMT2	1.72444	0.0002733	1.15e-05	1
APEH	1.72265	0.0002769	1.16e-05	1
XKR6	1.7301	0.0002809	1.18e-05	1
CRNKL1	1.7316	0.0002814	1.19e-05	1
IL32	1.72682	0.0002832	1.19e-05	1
PALLD	1.71116	0.0002834	1.2e-05	1
FGD3	1.72533	0.0002852	1.2e-05	1
CKAP5	1.6818	0.0002886	1.22e-05	1
PRMT2	1.68634	0.0002889	1.22e-05	1
DECR1	1.71674	0.0002895	1.23e-05	1
MAP3K7CL	1.5163	0.0002918	1.24e-05	1
CMPK2	1.6818	0.0002987	1.27e-05	1
WBP1L	1.75932	0.0002992	1.27e-05	1
ORMDL2	1.70416	0.0003002	1.28e-05	1
TTBK2	1.69924	0.0003026	1.29e-05	1
WDR20	1.6975	0.0003035	1.29e-05	1
IGKV1-17	1.64745	0.0003043	1.3e-05	1
IGF2BP3	1.69635	0.0003052	1.3e-05	1
RAD51C	1.69176	0.0003056	1.3e-05	1
USP31	1.70329	0.0003062	1.31e-05	1
MORC2	1.70039	0.0003077	1.31e-05	1
CLPX	1.69233	0.0003089	1.32e-05	1
MS4A1	1.65865	0.0003098	1.33e-05	1
FAM135A	1.71292	0.0003101	1.33e-05	1
DMXL2	1.68492	0.0003101	1.33e-05	1
TNRC6C	1.71057	0.0003165	1.36e-05	1
NIN	1.7135	0.0003199	1.37e-05	1
HGF	1.69866	0.0003271	1.41e-05	1
RABEP1	1.70184	0.0003285	1.42e-05	1
PUM2	1.68039	0.0003289	1.42e-05	1
RPUSD3	1.71497	0.0003343	1.44e-05	1
LOC101928429	1.68379	0.0003343	1.44e-05	1
MAN1A1	1.72087	0.0003393	1.47e-05	1
FAM217B	1.68776	0.0003395	1.47e-05	1
TBCE	1.68862	0.0003439	1.49e-05	1
PDCD6	1.69578	0.0003441	1.49e-05	1
ACLY	1.69463	0.0003442	1.5e-05	1
NOTCH2	1.7094	0.0003481	1.52e-05	1
FKBP15	1.68152	0.0003483	1.52e-05	1
UBQLN2	1.66223	0.0003483	1.52e-05	1
ARHGAP27	1.68663	0.0003548	1.55e-05	1
CD2	1.71233	0.0003548	1.55e-05	1
NIPSNAP3A	1.71145	0.0003552	1.55e-05	1
LILRA1	1.68209	0.0003559	1.56e-05	1
EFL1	1.70765	0.000356	1.56e-05	1
PCSK5	1.69147	0.0003606	1.58e-05	1
MICAL2	1.6218	0.0003669	1.61e-05	1
SLAMF6	1.6975	0.0003686	1.62e-05	1
NFYC	1.67757	0.0003699	1.63e-05	1
SDHC	1.70503	0.0003737	1.64e-05	1
HACD2	1.68435	0.0003741	1.65e-05	1
ACVR2A	1.68549	0.0003751	1.65e-05	1
RASSF4	1.68663	0.0003759	1.66e-05	1
FNIP2	1.67448	0.0003771	1.67e-05	1
AP2B1	1.69147	0.0003805	1.68e-05	1
CNPY2	1.6756	0.0003815	1.69e-05	1
SNX14	1.69291	0.0003832	1.7e-05	1
ARL14EP	1.6852	0.0003839	1.7e-05	1
AGA	1.68833	0.0003851	1.71e-05	1
HSPA6	1.56128	0.0003878	1.72e-05	1
PREB	1.67252	0.0003889	1.73e-05	1
TM2D1	1.67336	0.0003964	1.77e-05	1
UBE2L6	1.69492	0.0003973	1.77e-05	1
CALML4	1.67336	0.0003991	1.78e-05	1
FANCF	1.6728	0.0004013	1.79e-05	1
CALM2	1.69205	0.0004028	1.8e-05	1
2003-08-01	1.71762	0.0004077	1.82e-05	1
FZD2	1.68776	0.0004078	1.82e-05	1
NOTCH2NLA	1.6728	0.0004108	1.84e-05	1
JRKL	1.67308	0.0004136	1.85e-05	1
ERBIN	1.67954	0.0004146	1.86e-05	1
CALHM6	1.6581	0.0004152	1.86e-05	1
MAP3K7	1.68407	0.0004158	1.87e-05	1
CD47	1.63452	0.0004195	1.88e-05	1
CEP68	1.67616	0.0004195	1.89e-05	1
NUP42	1.6756	0.0004202	1.89e-05	1
C2CD5	1.6714	0.0004214	1.9e-05	1
ZHX2	1.62022	0.0004231	1.91e-05	1
TMX1	1.68322	0.0004254	1.92e-05	1
PREP	1.68095	0.0004283	1.93e-05	1
TPGS2	1.6852	0.0004293	1.95e-05	1
BET1	1.67336	0.0004295	1.94e-05	1
CMTM4	1.68862	0.0004299	1.95e-05	1
TCEAL8	1.67224	0.0004303	1.95e-05	1
SUPT20H	1.67645	0.0004341	1.97e-05	1
CYFIP1	1.6835	0.0004343	1.98e-05	1
TPM1	1.47362	0.000435	1.98e-05	1
TMEM65	1.68237	0.0004392	2e-05	1
LFNG	1.67084	0.0004397	2.01e-05	1
MGA	1.67168	0.0004421	2.02e-05	1
MAP4K4	1.67616	0.0004489	2.05e-05	1
TNS3	1.68492	0.0004516	2.07e-05	1
FZD1	1.68435	0.0004542	2.08e-05	1
EMSY	1.66362	0.0004542	2.08e-05	1
CDC14B	1.54202	0.0004572	2.1e-05	1
GLB1	1.66667	0.0004579	2.1e-05	1
M6PR	1.68464	0.0004598	2.11e-05	1
HIGD1A	1.66528	0.0004612	2.12e-05	1
ZNF143	1.6675	0.0004616	2.12e-05	1
GGPS1	1.66556	0.0004631	2.13e-05	1
GON7	1.66889	0.0004632	2.13e-05	1
SNUPN	1.67898	0.0004633	2.13e-05	1
ACOT13	1.66472	0.0004634	2.13e-05	1
CD300A	1.65645	0.0004687	2.16e-05	1
EIF5B	1.65948	0.0004689	2.16e-05	1
RALBP1	1.68464	0.0004692	2.17e-05	1
ARV1	1.6787	0.0004703	2.17e-05	1
ZMPSTE24	1.66917	0.0004704	2.17e-05	1
AHCYL1	1.65235	0.0004774	2.21e-05	1
UBE2V2	1.66058	0.000478	2.21e-05	1
TMEM229B	1.64663	0.0004781	2.21e-05	1
ISOC1	1.67448	0.0004782	2.21e-05	1
ZADH2	1.68947	0.0004825	2.24e-05	1
PUS7	1.67364	0.0004879	2.27e-05	1
DPAGT1	1.69377	0.0004931	2.29e-05	1
SMARCA4	1.68379	0.0004932	2.29e-05	1
UBA1	1.66889	0.0004952	2.31e-05	1
FEZ2	1.66556	0.0004992	2.33e-05	1
ANKRD13C	1.66003	0.0004994	2.33e-05	1
UTP6	1.65071	0.0005014	2.34e-05	1
PRDX1	1.67056	0.0005016	2.34e-05	1
SAMD4A	1.65508	0.0005083	2.38e-05	1
ABCC10	1.67532	0.0005086	2.38e-05	1
UFSP2	1.69233	0.0005097	2.39e-05	1
ANXA3	1.47514	0.0005099	2.39e-05	1
OBI1	1.63827	0.0005134	2.41e-05	1
TMEM170B	1.6603	0.0005209	2.45e-05	1
TSPAN13	1.68663	0.0005211	2.45e-05	1
CSK	1.66917	0.0005239	2.47e-05	1
SLC33A1	1.67252	0.0005311	2.5e-05	1
KICS2	1.68124	0.0005315	2.51e-05	1
CEACAM8	1.39179	0.0005364	2.53e-05	1
THAP5	1.67252	0.0005366	2.53e-05	1
YME1L1	1.63292	0.0005369	2.54e-05	1
DROSHA	1.66445	0.0005387	2.55e-05	1
LILRB2	1.66113	0.00054	2.55e-05	1
FIG4	1.68776	0.0005437	2.57e-05	1
DCAF10	1.66003	0.0005506	2.61e-05	1
ZMAT3	1.65481	0.0005515	2.61e-05	1
RAI1	1.64555	0.0005519	2.62e-05	1
HAUS1	1.66417	0.0005538	2.63e-05	1
ZNF439	1.65426	0.000555	2.64e-05	1
ELOVL6	1.66141	0.0005578	2.65e-05	1
HPS5	1.65865	0.0005615	2.67e-05	1
SOAT1	1.65645	0.0005616	2.67e-05	1
CLCC1	1.6518	0.0005649	2.69e-05	1
PRIMPOL	1.64528	0.0005651	2.69e-05	1
SP1	1.65317	0.0005656	2.7e-05	1
PCED1B	1.65728	0.0005658	2.7e-05	1
CASP2	1.64935	0.0005667	2.7e-05	1
CCT5	1.65728	0.0005797	2.78e-05	1
CENPBD1P	1.66306	0.0005797	2.78e-05	1
LPAR1	1.66085	0.0005851	2.81e-05	1
ZNF106	1.65125	0.0006051	2.91e-05	1
NUP62	1.64609	0.0006086	2.93e-05	1
CREB3L2	1.66196	0.000611	2.94e-05	1
LAPTM4B	1.65948	0.0006133	2.96e-05	1
PSAT1	1.64474	0.0006171	2.98e-05	1
ZNF677	1.6469	0.0006266	3.03e-05	1
FLJ32255	1.64177	0.0006282	3.03e-05	1
ZNF81	1.64745	0.0006375	3.09e-05	1
ADGRG5	1.6728	0.0006482	3.14e-05	1
HRH2	1.6442	0.0006528	3.17e-05	1
PIK3AP1	1.6675	0.0006547	3.18e-05	1
FAR1	1.64609	0.0006571	3.19e-05	1
CMAS	1.64528	0.0006573	3.19e-05	1
SEH1L	1.66334	0.0006668	3.25e-05	1
HIVEP2	1.63693	0.0006696	3.26e-05	1
BAZ2B	1.66889	0.0006723	3.28e-05	1
C3AR1	1.60694	0.000675	3.3e-05	1
CDK8	1.64989	0.0006882	3.37e-05	1
TMEM250	1.64772	0.0006903	3.38e-05	1
GORASP2	1.63988	0.0006936	3.39e-05	1
SNX20	1.6372	0.0007028	3.44e-05	1
HERC2P7	1.62602	0.0007179	3.52e-05	1
TMEM268	1.63132	0.0007193	3.53e-05	1
TCAIM	1.6469	0.0007222	3.55e-05	1
ATIC	1.66583	0.0007226	3.55e-05	1
GSDMB	1.6176	0.0007267	3.58e-05	1
ZBTB20	1.64096	0.0007274	3.58e-05	1
AASDH	1.6488	0.0007302	3.6e-05	1
AFTPH	1.62866	0.0007328	3.62e-05	1
PIAS1	1.66141	0.0007364	3.64e-05	1
AGPS	1.64204	0.0007406	3.67e-05	1
COPS5	1.63854	0.0007429	3.68e-05	1
FCRL1	1.55424	0.0007446	3.69e-05	1
GOLPH3	1.6239	0.000745	3.7e-05	1
PLRG1	1.63773	0.0007532	3.74e-05	1
H3C10	1.47842	0.0007535	3.74e-05	1
EXOC1	1.63372	0.0007535	3.75e-05	1
WSB1	1.63613	0.0007548	3.76e-05	1
NAAA	1.65563	0.0007597	3.78e-05	1
PDCD10	1.62655	0.0007613	3.79e-05	1
RBL2	1.65317	0.0007625	3.8e-05	1
TRAPPC13	1.64042	0.0007681	3.84e-05	1
PSD4	1.63479	0.0007806	3.91e-05	1
SNX27	1.63106	0.0007878	3.96e-05	1
VDAC3	1.63532	0.0007879	3.96e-05	1
TTC14	1.61655	0.0007896	3.97e-05	1
ZMYM1	1.6284	0.0007896	3.97e-05	1
TMEM33	1.62973	0.000791	3.98e-05	1
AKAP7	1.62417	0.0007942	4e-05	1
VCL	1.57953	0.0007983	4.02e-05	1
ERVK13-1	1.63559	0.0008039	4.06e-05	1
ATXN2	1.6603	0.0008106	4.1e-05	1
GATAD2B	1.63479	0.0008108	4.1e-05	1
TRDV3	1.51263	0.000811	4.1e-05	1
DPP8	1.6372	0.0008111	4.1e-05	1
SLFN13	1.62285	0.0008111	4.11e-05	1
NID1	1.58178	0.0008114	4.11e-05	1
STAMBPL1	1.63239	0.0008157	4.14e-05	1
B3GALNT2	1.63586	0.0008179	4.15e-05	1
PRAM1	1.62866	0.0008184	4.15e-05	1
WDR12	1.638	0.0008286	4.21e-05	1
ZNF101	1.62364	0.0008345	4.25e-05	1
MFAP3L	1.38007	0.0008365	4.26e-05	1
C1QBP	1.67196	0.0008369	4.27e-05	1
DTWD1	1.63265	0.0008406	4.29e-05	1
PTPRJ	1.65399	0.0008458	4.32e-05	1
AGMAT	1.64123	0.0008461	4.32e-05	1
IQGAP2	1.60849	0.0008463	4.33e-05	1
MAP3K20	1.58856	0.0008499	4.35e-05	1
CEP170	1.60798	0.0008633	4.42e-05	1
NLN	1.62787	0.0008697	4.46e-05	1
VEZT	1.61057	0.0008787	4.51e-05	1
ADCY9	1.63881	0.0008819	4.53e-05	1
ATG5	1.61812	0.0008829	4.54e-05	1
TERF1	1.66141	0.0008837	4.55e-05	1
MRE11	1.6276	0.0008847	4.56e-05	1
AFF1	1.64123	0.0008848	4.56e-05	1
SLK	1.61943	0.0008861	4.57e-05	1
CDIPT	1.62127	0.0009003	4.65e-05	1
ZNF44	1.63961	0.0009143	4.72e-05	1
SLC25A45	1.63425	0.0009145	4.73e-05	1
AP3M1	1.62707	0.0009206	4.76e-05	1
AGK	1.63132	0.0009216	4.77e-05	1
TM7SF3	1.60643	0.0009229	4.78e-05	1
FUT11	1.61577	0.000923	4.78e-05	1
ZNF217	1.61681	0.0009299	4.83e-05	1
FYCO1	1.6276	0.0009311	4.83e-05	1
IGHM	1.55812	0.0009375	4.87e-05	1
GTF3A	1.64258	0.0009416	4.9e-05	1
SEPTIN10	1.6284	0.0009418	4.9e-05	1
C5orf63	1.63106	0.000942	4.9e-05	1
EFCAB14	1.63854	0.0009437	4.92e-05	1
IMMP1L	1.60514	0.0009445	4.92e-05	1
HCCS	1.60179	0.0009447	4.93e-05	1
DNAJA3	1.62075	0.0009448	4.93e-05	1
RAB7A	1.62232	0.0009498	4.96e-05	1
DCUN1D4	1.6284	0.0009533	4.98e-05	1
GID4	1.62575	0.0009538	4.98e-05	1
OSBPL3	1.62707	0.0009621	5.04e-05	1
PRKAR2B	1.37817	0.0009715	5.09e-05	1
PSMA4	1.61082	0.0009718	5.09e-05	1
RAP1A	1.61812	0.0009747	5.11e-05	1
LEPR	1.45985	0.0009804	5.15e-05	1
EPRS1	1.62734	0.0009823	5.16e-05	1
REEP5	1.63052	0.000986	5.19e-05	1
MAPK1	1.61082	0.0009926	5.23e-05	1
SMYD2	1.63452	0.0009952	5.24e-05	1
SLC39A10	1.62893	0.0009984	5.26e-05	1
EPPK1	1.61734	0.001	5.28e-05	1
LUC7L3	1.58228	0.001011	5.34e-05	1
ZNF224	1.61473	0.001021	5.39e-05	1
MRPS6	1.61734	0.001025	5.42e-05	1
RUVBL1	1.62628	0.001029	5.44e-05	1
USP18	1.65893	0.001029	5.44e-05	1
WDR11	1.6218	0.001032	5.46e-05	1
TRDC	1.53681	0.001034	5.48e-05	1
DMAC1	1.6197	0.001036	5.5e-05	1
TAX1BP1	1.61708	0.001036	5.49e-05	1
VAMP8	1.60979	0.001044	5.54e-05	1
UBE2W	1.61447	0.001045	5.55e-05	1
RAC2	1.61943	0.00105	5.58e-05	1
TTC22	1.61368	0.001053	5.61e-05	1
RDH11	1.60668	0.001061	5.65e-05	1
SCML4	1.60979	0.001066	5.69e-05	1
COQ9	1.61342	0.001074	5.73e-05	1
ARHGAP35	1.62973	0.001077	5.75e-05	1
POP5	1.62999	0.001081	5.78e-05	1
VPS13D	1.62232	0.001081	5.78e-05	1
CCT3	1.60385	0.0011	5.89e-05	1
CMSS1	1.61551	0.001125	6.04e-05	1
ALG8	1.60798	0.001128	6.07e-05	1
BICD1	1.6072	0.001134	6.11e-05	1
RAB29	1.59541	0.001134	6.11e-05	1
GEMIN6	1.60798	0.001139	6.14e-05	1
CCDC88A	1.60333	0.00116	6.26e-05	1
RGS14	1.60927	0.001161	6.27e-05	1
POU2AF1	1.51492	0.001161	6.27e-05	1
JCHAIN	1.51423	0.001165	6.3e-05	1
ANKRD46	1.60798	0.001169	6.33e-05	1
CILK1	1.61499	0.001171	6.34e-05	1
TPST2	1.60411	0.001176	6.38e-05	1
KCNE3	1.60179	0.001191	6.46e-05	1
ITPR1	1.60643	0.001193	6.49e-05	1
TRIM44	1.6239	0.001196	6.5e-05	1
DIAPH2	1.59872	0.001201	6.54e-05	1
ANKRD55	1.56568	0.001202	6.55e-05	1
LACC1	1.5163	0.00122	6.66e-05	1
CALD1	1.26936	0.001222	6.68e-05	1
REEP3	1.6218	0.001222	6.68e-05	1
S100PBP	1.61786	0.001234	6.75e-05	1
SANBR	1.60875	0.001234	6.75e-05	1
SLC35D2	1.58604	0.00124	6.79e-05	1
PDCD5	1.63212	0.001247	6.83e-05	1
GNPDA1	1.60798	0.001248	6.84e-05	1
TSHZ1	1.60282	0.001259	6.91e-05	1
ANXA6	1.6129	0.001263	6.94e-05	1
KLHL36	1.59719	0.001266	6.95e-05	1
DEGS1	1.58504	0.001276	7.02e-05	1
MMUT	1.59388	0.001278	7.03e-05	1
NPHP3	1.60436	0.001282	7.05e-05	1
SNX13	1.61212	0.001289	7.1e-05	1
CEP104	1.61473	0.00131	7.23e-05	1
EBF1	1.50263	0.001313	7.25e-05	1
RAP1GDS1	1.59847	0.001314	7.25e-05	1
NUDT9	1.61681	0.001315	7.26e-05	1
NBN	1.55909	0.001321	7.3e-05	1
FRAT2	1.58781	0.001321	7.31e-05	1
CCDC112	1.60565	0.001331	7.38e-05	1
CAB39	1.59286	0.001332	7.37e-05	1
MON1B	1.59058	0.00134	7.43e-05	1
BBX	1.59847	0.00134	7.43e-05	1
RASA1	1.60462	0.001347	7.49e-05	1
LINC01184	1.59312	0.001355	7.54e-05	1
KDELR2	1.58983	0.001357	7.55e-05	1
PRIM1	1.58655	0.001357	7.55e-05	1
ZDHHC13	1.60927	0.00136	7.57e-05	1
HNRNPA2B1	1.61812	0.00138	7.69e-05	1
CPSF3	1.58453	0.001384	7.72e-05	1
GALT	1.60436	0.001397	7.8e-05	1
CHST2	1.59872	0.001398	7.81e-05	1
PPP2R5E	1.59312	0.001405	7.86e-05	1
STON2	1.57431	0.001405	7.86e-05	1
BAZ1B	1.59185	0.001408	7.88e-05	1
CR2	1.58479	0.001408	7.88e-05	1
VPREB3	1.58228	0.001408	7.89e-05	1
PCDH9	1.59515	0.001409	7.89e-05	1
FAM111A	1.62707	0.001418	7.95e-05	1
TTLL5	1.57978	0.001429	8.02e-05	1
ZNF264	1.59515	0.001437	8.08e-05	1
ADPRH	1.5916	0.001447	8.14e-05	1
DPY19L4	1.58053	0.001447	8.15e-05	1
TSPAN31	1.6072	0.001449	8.16e-05	1
TRIM4	1.58529	0.001452	8.19e-05	1
CERT1	1.58153	0.001452	8.18e-05	1
MRPL15	1.58128	0.001457	8.22e-05	1
ISG15	1.59363	0.001468	8.3e-05	1
KIF16B	1.60179	0.00147	8.31e-05	1
CPNE8	1.60154	0.001473	8.33e-05	1
GBE1	1.59872	0.001478	8.36e-05	1
PDGFC	1.60565	0.001481	8.38e-05	1
FTSJ3	1.58806	0.001483	8.41e-05	1
MOB1B	1.59033	0.001483	8.41e-05	1
CDK4	1.57853	0.001489	8.45e-05	1
WDR61	1.59109	0.001522	8.67e-05	1
MLKL	1.60308	0.001528	8.71e-05	1
ZCCHC10	1.5586	0.001528	8.7e-05	1
RAB11A	1.59898	0.001536	8.76e-05	1
ARID1B	1.56715	0.001543	8.81e-05	1
PLCB1	1.59109	0.001548	8.84e-05	1
SLC12A2	1.55424	0.001549	8.85e-05	1
GPATCH2	1.57953	0.001556	8.9e-05	1
UBR2	1.54083	0.001557	8.9e-05	1
ZBTB37	1.58755	0.001562	8.94e-05	1
ADA2	1.58378	0.001566	8.96e-05	1
IARS1	1.5748	0.001567	8.98e-05	1
LARP1	1.59515	0.001581	9.06e-05	1
ZMYND8	1.59261	0.001582	9.07e-05	1
ACOX1	1.59058	0.001588	9.11e-05	1
ZFP62	1.57978	0.001592	9.13e-05	1
CENPJ	1.58554	0.001595	9.16e-05	1
ZNF880	1.5321	0.0016	9.19e-05	1
WASHC3	1.59337	0.00161	9.25e-05	1
HIBADH	1.61577	0.001615	9.3e-05	1
MRPS23	1.58178	0.001615	9.31e-05	1
MAML3	1.58957	0.001615	9.31e-05	1
SCP2	1.57903	0.001616	9.32e-05	1
GPN3	1.59744	0.001624	9.37e-05	1
FLCN	1.58178	0.001625	9.38e-05	1
PLXNC1	1.58303	0.001626	9.39e-05	1
FGR	1.60385	0.001632	9.43e-05	1
LSM6	1.57604	0.001644	9.51e-05	1
FOCAD	1.5916	0.001645	9.52e-05	1
RALGAPA2	1.58353	0.001645	9.52e-05	1
ETS1	1.60333	0.001646	9.53e-05	1
WASHC4	1.58003	0.001648	9.55e-05	1
ELMOD2	1.58831	0.001659	9.62e-05	1
UBE3C	1.5977	0.001665	9.66e-05	1
ZNF318	1.57953	0.001671	9.71e-05	1
PAPSS1	1.60282	0.001674	9.73e-05	1
INTS9	1.57903	0.001703	9.9e-05	1
INPP4A	1.59363	0.001737	0.000101	1
PRPF38A	1.57604	0.00176	0.0001025	1
ABHD3	1.57332	0.001765	0.0001029	1
SEPTIN9	1.56617	0.001767	0.000103	1
NSD3	1.57431	0.001771	0.0001034	1
PARP4	1.57183	0.001773	0.0001035	1
GIMAP2	1.58479	0.001774	0.0001036	1
TMEM60	1.57406	0.001783	0.0001042	1
NSDHL	1.57307	0.001789	0.0001046	1
ERI2	1.56912	0.001802	0.0001055	1
PSMD14	1.58907	0.001816	0.0001063	1
C5orf22	1.5873	0.001837	0.0001076	1
DGCR2	1.59084	0.001838	0.0001077	1
MMAA	1.58228	0.001842	0.000108	1
STIP1	1.56691	0.001863	0.0001094	1
ARL13B	1.57505	0.001869	0.0001098	1
SLC44A1	1.5625	0.001882	0.0001107	1
TBC1D1	1.57406	0.001902	0.0001121	1
IMMT	1.58103	0.001902	0.0001121	1
NAA25	1.55982	0.001911	0.0001126	1
FKTN	1.5868	0.001927	0.0001137	1
GLE1	1.55594	0.001928	0.0001138	1
MTR	1.58907	0.001937	0.0001145	1
NRDC	1.59109	0.001939	0.0001147	1
LMBRD1	1.56299	0.001954	0.0001158	1
PSIP1	1.60591	0.001954	0.0001157	1
C18orf54	1.57109	0.001962	0.0001163	1
MAN1C1	1.60333	0.001962	0.0001163	1
PF4	1.45858	0.001966	0.0001166	1
METTL3	1.60901	0.001967	0.0001168	1
MCMBP	1.56593	0.001967	0.0001167	1
PTPRO	1.56006	0.001968	0.0001169	1
KIAA0930	1.58428	0.001971	0.0001172	1
CUTALP	1.42491	0.001972	0.0001173	1
DYM	1.56446	0.00198	0.0001178	1
POGLUT1	1.5706	0.001981	0.0001179	1
ANKRD27	1.55982	0.001985	0.0001182	1
FAM216A	1.55739	0.00199	0.0001186	1
CUL4B	1.56568	0.001992	0.0001187	1
ZNF107	1.58378	0.002002	0.0001194	1
RNF34	1.57159	0.002006	0.0001197	1
SPARC	1.30617	0.002021	0.0001206	1
TTL	1.58957	0.002044	0.0001222	1
PGBD2	1.56887	0.002045	0.0001224	1
ERLIN2	1.55788	0.002045	0.0001223	1
SLC25A11	1.56593	0.002054	0.000123	1
KAT14	1.58253	0.002055	0.0001231	1
NNT	1.56104	0.002062	0.0001236	1
RPS6KA1	1.56691	0.002064	0.0001239	1
ERP44	1.56715	0.00207	0.0001243	1
MARK3	1.56323	0.002078	0.0001248	1
GPR141	1.57704	0.002086	0.0001255	1
PRDX6-AS1	1.56887	0.002104	0.0001268	1
APPL1	1.58529	0.002131	0.0001286	1
POP7	1.56128	0.002131	0.0001286	1
EXT1	1.56961	0.002155	0.0001303	1
PRR14L	1.54943	0.002158	0.0001305	1
ZNF320	1.56177	0.002168	0.0001313	1
UQCC2	1.55715	0.00218	0.0001321	1
YPEL1	1.54036	0.002183	0.0001324	1
EIF1AX	1.52602	0.002209	0.0001342	1
PSMD6-AS2	1.58353	0.002211	0.0001344	1
APTX	1.55063	0.002212	0.0001345	1
CDC23	1.56887	0.002218	0.000135	1
ADNP	1.57233	0.002219	0.0001351	1
PPARA	1.57754	0.002254	0.0001376	1
PDE6D	1.5706	0.002254	0.0001375	1
KPNA1	1.54416	0.002254	0.0001376	1
MED8	1.56863	0.002255	0.0001375	1
UBE2D1	1.56299	0.002255	0.0001375	1
CHRM3-AS2	1.4892	0.002256	0.0001378	1
GPATCH1	1.57257	0.002263	0.0001383	1
OSBPL8	1.56642	0.002268	0.0001386	1
CLTA	1.54536	0.002269	0.0001388	1
IL2RB	1.5456	0.00227	0.0001389	1
ELP4	1.55885	0.002279	0.0001395	1
RAPGEF6	1.58128	0.002294	0.0001407	1
MSANTD4	1.56372	0.002309	0.0001418	1
PPP1R12A	1.54967	0.002311	0.000142	1
SRP9	1.55812	0.002312	0.0001422	1
RBM12	1.56519	0.002318	0.0001426	1
MED13L	1.57282	0.002319	0.0001427	1
TTC1	1.57011	0.00232	0.0001428	1
ABI2	1.55642	0.002332	0.0001437	1
CYFIP2	1.56937	0.002337	0.0001441	1
CDK13	1.55304	0.002338	0.0001442	1
KLHL12	1.56495	0.00235	0.000145	1
LGALSL	1.38045	0.002358	0.0001456	1
C11orf21	1.56226	0.002362	0.000146	1
RP2	1.53374	0.002375	0.000147	1
SSR1	1.54297	0.002376	0.000147	1
GSKIP	1.55159	0.002381	0.0001475	1
FYN	1.53728	0.002395	0.0001483	1
ERAP1	1.5868	0.002411	0.0001496	1
ARHGAP5	1.55618	0.002421	0.0001504	1
MED1	1.53681	0.002435	0.0001515	1
C1orf162	1.57282	0.002443	0.0001521	1
SNAP23	1.58453	0.002448	0.0001525	1
MARCHF7	1.54036	0.002455	0.000153	1
METTL8	1.56937	0.002458	0.0001534	1
FBXL16	1.56666	0.002458	0.0001534	1
MOCS2	1.55255	0.002482	0.0001549	1
BMPR2	1.57307	0.002482	0.0001552	1
HNRNPUL2	1.57456	0.002483	0.0001551	1
CDK19	1.55424	0.002486	0.0001555	1
GNAQ	1.55304	0.002516	0.0001577	1
PSMB10	1.56838	0.00252	0.0001579	1
LOC102606465	1.54703	0.002527	0.0001585	1
PAX5	1.43021	0.002529	0.0001586	1
SLC30A5	1.55618	0.002536	0.0001592	1
TMEM107	1.5674	0.002546	0.0001599	1
LY9	1.55497	0.002548	0.0001601	1
NUDT21	1.55594	0.002551	0.0001605	1
LPAR6	1.54321	0.002551	0.0001603	1
MYOM2	1.37969	0.002552	0.0001605	1
PRMT6	1.54991	0.002554	0.0001608	1
HAL	1.52346	0.002592	0.0001632	1
RBBP4	1.57356	0.002597	0.0001636	1
TRIB2	1.55958	0.002601	0.0001639	1
NABP1	1.50173	0.002613	0.0001648	1
RRM2	1.58003	0.002617	0.0001651	1
DOP1A	1.54631	0.002636	0.0001664	1
OSCAR	1.53468	0.002636	0.0001663	1
EID1	1.57406	0.002658	0.000168	1
TNFSF4	1.46177	0.002659	0.0001682	1
BARD1	1.55039	0.00266	0.0001683	1
SERPINI1	1.5569	0.002662	0.0001685	1
CRLF3	1.55497	0.002674	0.0001694	1
SELENOH	1.55304	0.002684	0.0001702	1
NLRP12	1.53941	0.002712	0.0001721	1
MRPL3	1.5444	0.002715	0.0001724	1
HDAC4	1.55207	0.002715	0.0001725	1
RCN1	1.54536	0.002716	0.0001727	1
C19orf12	1.53586	0.002716	0.0001724	1
PYCR2	1.5425	0.002724	0.0001733	1
ZNF397	1.57011	0.002747	0.000175	1
PTPRC	1.5425	0.002754	0.0001755	1
DHFR	1.54871	0.002755	0.0001756	1
CD96	1.5444	0.002773	0.0001768	1
SULT1A1	1.54416	0.002791	0.0001781	1
ZNF792	1.54369	0.002805	0.0001791	1
EBAG9	1.56446	0.002815	0.0001799	1
PRKCD	1.54202	0.002835	0.0001815	1
CLU	1.35722	0.002836	0.0001816	1
ADAR	1.53775	0.002838	0.0001819	1
ZNF12	1.54297	0.002844	0.0001823	1
TMEM14A	1.5528	0.002845	0.0001825	1
EFCAB7	1.55255	0.002848	0.0001828	1
VWA8	1.55569	0.002885	0.0001853	1
GAPVD1	1.53186	0.002885	0.0001852	1
DPY19L1	1.54512	0.002886	0.0001854	1
EYA3	1.54631	0.002889	0.0001857	1
CLTC	1.54154	0.002905	0.0001869	1
FBXL4	1.55255	0.002934	0.0001888	1
TMEM167A	1.53445	0.002938	0.0001892	1
MAGOHB	1.55836	0.002976	0.0001921	1
INIP	1.53445	0.002976	0.0001921	1
RAB3GAP2	1.54943	0.002976	0.0001922	1
NPEPPS	1.5361	0.002985	0.0001931	1
FBXL20	1.50444	0.002985	0.000193	1
RAB11FIP3	1.53799	0.002985	0.0001931	1
GPATCH4	1.55448	0.002986	0.000193	1
POMP	1.53492	0.003001	0.0001945	1
PKD2	1.54607	0.003054	0.0001981	1
IFNAR2	1.54607	0.00306	0.0001986	1
PALB2	1.54107	0.003078	0.0002	1
SKP2	1.53633	0.00309	0.000201	1
TMEM273	1.5456	0.003099	0.0002018	1
PPP3CB-AS1	1.53822	0.003112	0.0002028	1
PPP1R11	1.53445	0.003112	0.0002028	1
NOLC1	1.54321	0.003135	0.0002046	1
PLEKHA8	1.5328	0.00314	0.0002049	1
ZFP90	1.55231	0.003153	0.0002058	1
FANCL	1.52835	0.00316	0.0002064	1
CEP162	1.53351	0.003169	0.0002071	1
CIAO2A	1.55788	0.003182	0.000208	1
SRGAP2B	1.50807	0.003217	0.0002104	1
ERVK3-1	1.47449	0.003225	0.000211	1
LDLRAP1	1.54799	0.003241	0.0002121	1
PPM1K	1.54655	0.00325	0.000213	1
DDX23	1.53657	0.003252	0.0002132	1
MRPL1	1.54107	0.00326	0.0002139	1
GTF3C3	1.5444	0.003262	0.0002141	1
CCDC91	1.56495	0.003274	0.000215	1
PPP4R2	1.55111	0.003294	0.0002164	1
SACM1L	1.54512	0.003295	0.0002166	1
FMNL2	1.53822	0.003312	0.0002178	1
NT5E	1.54012	0.003313	0.000218	1
GUCY1B1	1.46199	0.003329	0.0002194	1
HEATR5A	1.53492	0.003332	0.0002197	1
SLC38A6	1.53539	0.003333	0.0002199	1
TMBIM4	1.53351	0.003342	0.0002206	1
EIF4ENIF1	1.55473	0.003376	0.000223	1
UQCR10	1.53257	0.003391	0.000224	1
EHMT2	1.54131	0.003414	0.000226	1
ARL1	1.52369	0.003429	0.0002272	1
NOG	1.50943	0.003429	0.0002272	1
SH2D1A	1.53233	0.003468	0.00023	1
PABIR1	1.52555	0.00349	0.0002318	1
ALG14	1.53822	0.003495	0.0002324	1
TBL2	1.52369	0.003507	0.0002333	1
FBN2	1.49076	0.003508	0.0002335	1
ENOX2	1.52858	0.003532	0.0002352	1
GOSR2	1.53586	0.003545	0.0002364	1
MTHFD1	1.54703	0.003547	0.0002367	1
SCFD2	1.54297	0.003554	0.0002372	1
FH	1.54679	0.003564	0.0002381	1
SNX6	1.53139	0.003569	0.0002387	1
CNTRL	1.5528	0.00357	0.0002387	1
MRPS12	1.53163	0.003591	0.0002403	1
SFT2D1	1.52929	0.003594	0.0002407	1
PROS1	1.37137	0.003596	0.0002409	1
ATG10	1.55933	0.003597	0.0002411	1
RMDN2	1.5163	0.003608	0.0002419	1
CSNK1G1	1.53092	0.00361	0.0002421	1
RNGTT	1.52114	0.003617	0.0002427	1
TTC27	1.53116	0.003621	0.0002431	1
XK	1.36482	0.00363	0.0002437	1
ITGA6	1.53186	0.00364	0.0002445	1
RFC3	1.53304	0.003667	0.0002464	1
CAMTA1	1.52462	0.003682	0.0002475	1
KIAA1958	1.49903	0.003692	0.0002483	1
FBLN5	1.51976	0.003711	0.0002497	1
UBTF	1.52462	0.003712	0.0002499	1
CASK	1.54226	0.003734	0.0002514	1
TRAFD1	1.51332	0.003734	0.0002515	1
PPIP5K2	1.53965	0.003737	0.0002518	1
LAT	1.52045	0.003756	0.0002534	1
BIRC6	1.51607	0.003759	0.0002536	1
LIMS1	1.54823	0.003764	0.0002541	1
ZBTB38	1.51172	0.003775	0.0002549	1
LIMA1	1.51768	0.003782	0.0002555	1
UXS1	1.52858	0.003782	0.0002557	1
HELQ	1.52952	0.003783	0.0002558	1
PCK2	1.53304	0.003809	0.0002577	1
SCAI	1.51722	0.003837	0.0002598	1
TMEM128	1.53468	0.003838	0.0002599	1
FPR2	1.42796	0.00384	0.0002602	1
CBLB	1.52323	0.003863	0.0002619	1
IL16	1.51057	0.003864	0.0002619	1
MTX2	1.52346	0.003869	0.0002624	1
EOMES	1.47907	0.003873	0.0002629	1
GFM1	1.51676	0.003903	0.0002651	1
LINC00954	1.52416	0.003906	0.0002655	1
DHTKD1	1.52695	0.003965	0.00027	1
SPAST	1.49231	0.003981	0.0002713	1
SORD	1.53516	0.003982	0.0002714	1
CFDP1	1.56006	0.003985	0.0002717	1
EIF3M	1.49298	0.003995	0.0002726	1
DNAJB6	1.51883	0.004006	0.0002736	1
STAT6	1.5108	0.004025	0.0002753	1
DFFA	1.53186	0.00403	0.0002757	1
ATMIN	1.52068	0.004038	0.0002765	1
EIF4E2	1.51653	0.004044	0.000277	1
ZRANB2	1.52068	0.004047	0.0002772	1
ZNF654	1.52602	0.004056	0.000278	1
CEP164	1.51423	0.004096	0.0002814	1
SLC2A13	1.52695	0.004096	0.0002815	1
EXOC6	1.52068	0.004097	0.0002817	1
MTM1	1.52439	0.004139	0.0002847	1
PIGG	1.53775	0.00415	0.0002856	1
PRSS23	1.44802	0.004191	0.0002891	1
CDK12	1.51976	0.004196	0.0002897	1
DNMT1	1.51607	0.004196	0.0002895	1
FES	1.51906	0.004224	0.000292	1
PIGK	1.51263	0.004231	0.0002927	1
CD226	1.51172	0.004243	0.0002939	1
C17orf80	1.52207	0.004335	0.000301	1
FAM185A	1.52277	0.004354	0.0003025	1
RGS18	1.41743	0.004413	0.0003068	1
HIP1	1.48566	0.00444	0.0003091	1
KLHDC1	1.50534	0.004441	0.000309	1
GALNT2	1.49589	0.004443	0.0003093	1
TOP2B	1.5083	0.004443	0.0003095	1
INTS7	1.49254	0.004443	0.0003094	1
DPH6	1.51515	0.004449	0.0003102	1
ZNF232	1.50898	0.004521	0.0003157	1
SMC6	1.51837	0.004544	0.0003175	1
ATP11A	1.50353	0.004547	0.000318	1
SLC43A3	1.49566	0.004548	0.0003179	1
WAPL	1.50015	0.004551	0.0003186	1
TAL1	1.38427	0.004551	0.0003186	1
MRPL58	1.51814	0.004557	0.0003194	1
UGP2	1.51607	0.004591	0.0003219	1
ADK	1.50083	0.004615	0.0003238	1
YIPF6	1.523	0.004616	0.0003238	1
PDE5A	1.37684	0.00463	0.000325	1
LCN2	1.38947	0.004662	0.0003275	1
GBAP1	1.51126	0.004663	0.0003276	1
NDUFAF3	1.52462	0.00472	0.0003321	1
BTN3A1	1.50512	0.004753	0.0003348	1
MR1	1.50489	0.004753	0.0003349	1
LOC105371932	1.50943	0.004765	0.000336	1
MBP	1.50739	0.004778	0.0003371	1
TMEM248	1.5163	0.004781	0.0003374	1
ZNF782	1.48832	0.004798	0.0003392	1
DUT	1.54083	0.004809	0.0003401	1
CD72	1.50331	0.004815	0.0003406	1
TIGIT	1.50943	0.004823	0.0003415	1
PIAS4	1.51584	0.004835	0.0003424	1
CHIC1	1.50898	0.004848	0.0003435	1
LINC02076	1.51607	0.004862	0.0003447	1
ZFYVE26	1.49678	0.004866	0.0003451	1
MCTS1	1.51538	0.004872	0.0003457	1
LOC100505874	1.49656	0.004882	0.0003467	1
PALM2AKAP2	1.48192	0.004884	0.0003469	1
ATXN7L1	1.52672	0.004886	0.0003473	1
ZNRF2	1.50512	0.004888	0.0003479	1
ATG7	1.52138	0.004889	0.0003478	1
ME2	1.50739	0.004919	0.0003504	1
SHISA5	1.51446	0.004955	0.0003534	1
HIPK2	1.51126	0.00496	0.0003542	1
AHSA2P	1.50784	0.004963	0.0003545	1
PDCD2	1.51515	0.004981	0.000356	1
RNF141	1.46864	0.005004	0.0003578	1
SNX19	1.50784	0.005024	0.0003595	1
IGHD	1.42187	0.005049	0.0003617	1
F2RL1	1.45666	0.00509	0.000365	1
WRAP73	1.50444	0.005134	0.0003683	1
CEP63	1.50263	0.005147	0.0003695	1
MYC	1.50534	0.005148	0.0003695	1
GLCE	1.50761	0.005151	0.00037	1
NUP133	1.50625	0.005159	0.0003708	1
VPS13C	1.51584	0.005195	0.0003739	1
PRIM2	1.50376	0.005216	0.0003756	1
CLEC4A	1.50602	0.005233	0.0003771	1
LRRC69	1.49678	0.005253	0.0003791	1
SEC31A	1.50875	0.005275	0.000381	1
SNX29P2	1.49835	0.005277	0.0003813	1
PRKD2	1.39373	0.005308	0.000384	1
IPO7	1.49076	0.005311	0.0003843	1
HSPA1L	1.50693	0.005315	0.0003847	1
PSMG4	1.51126	0.005322	0.0003853	1
LRBA	1.50898	0.005324	0.0003856	1
TCHP	1.5067	0.005338	0.0003869	1
THEM4	1.50444	0.005339	0.0003872	1
TXNDC17	1.49454	0.005345	0.0003878	1
PATJ	1.5083	0.005403	0.0003924	1
RBM15	1.39958	0.005408	0.0003932	1
ATG3	1.49209	0.005411	0.0003931	1
FBXO5	1.5124	0.005428	0.0003949	1
AMN1	1.50943	0.005442	0.000396	1
CPTP	1.5456	0.005443	0.0003962	1
QRSL1	1.5067	0.005444	0.0003964	1
ANKH	1.46778	0.005507	0.0004015	1
SNAPC5	1.49054	0.005563	0.000406	1
LYAR	1.48699	0.005578	0.0004077	1
INSIG2	1.49701	0.005583	0.0004083	1
RASGEF1A	1.48214	0.005601	0.0004098	1
EPHA1-AS1	1.50716	0.00561	0.0004107	1
NCOA7	1.52555	0.005622	0.0004117	1
LOC202181	1.48544	0.005646	0.0004139	1
HENMT1	1.49903	0.005663	0.0004154	1
HCP5	1.47601	0.005666	0.0004157	1
ZNF200	1.45964	0.005694	0.0004182	1
NUDT3	1.48721	0.005696	0.0004187	1
THADA	1.48743	0.005737	0.0004221	1
PRPSAP2	1.51149	0.005754	0.0004235	1
ING1	1.50512	0.005761	0.0004241	1
IARS2	1.50286	0.005775	0.0004254	1
MRPS25	1.4828	0.005775	0.0004256	1
AIMP1	1.48544	0.005818	0.0004291	1
BLCAP	1.48987	0.005823	0.0004296	1
ZSCAN25	1.49254	0.005828	0.0004302	1
PGGT1B	1.5006	0.005828	0.0004304	1
MOSPD1	1.48854	0.005834	0.000431	1
ATP5MF	1.5058	0.005867	0.0004337	1
LRRC8D	1.49432	0.005868	0.0004338	1
ZNF33A	1.50376	0.005872	0.0004343	1
IRAG1	1.45476	0.005887	0.0004359	1
CNOT7	1.49566	0.005894	0.0004365	1
STAT2	1.50784	0.005918	0.0004385	1
NSUN5P1	1.49701	0.00592	0.0004387	1
ALDH9A1	1.48192	0.005952	0.0004417	1
CEP97	1.4881	0.005967	0.0004431	1
ACAT1	1.50105	0.005979	0.0004441	1
LRR1	1.47558	0.006039	0.0004488	1
MFSD1	1.5067	0.006065	0.0004511	1
MLEC	1.49098	0.006066	0.0004513	1
ANAPC7	1.48148	0.00607	0.0004517	1
NLRC3	1.49656	0.006083	0.0004529	1
DDX5	1.4861	0.006086	0.0004532	1
RGS19	1.50399	0.006103	0.0004546	1
MRPL36	1.48721	0.006105	0.0004551	1
MRPS9	1.49454	0.006106	0.0004551	1
C6orf120	1.48898	0.006116	0.0004561	1
CTSB	1.50784	0.006124	0.0004568	1
ARHGAP25	1.50399	0.006128	0.0004573	1
LYPLA1	1.48787	0.006138	0.0004583	1
SEPHS2	1.48633	0.006138	0.0004581	1
PSME2	1.50761	0.00615	0.0004594	1
VPS33A	1.49009	0.006159	0.0004608	1
ZNF544	1.48743	0.006159	0.0004605	1
PHACTR2	1.52346	0.006159	0.0004609	1
PEAK1	1.48633	0.00616	0.0004607	1
FAM220A	1.49142	0.006164	0.0004615	1
KLHL14	1.47536	0.006192	0.0004638	1
COMMD2	1.5067	0.006193	0.0004639	1
MRPL48	1.51172	0.006197	0.0004644	1
ERCC4	1.4912	0.006198	0.0004647	1
KYNU	1.49678	0.006252	0.0004688	1
MAD2L1	1.45751	0.006261	0.0004696	1
IER3IP1	1.48743	0.006266	0.0004702	1
LINC00205	1.47885	0.006292	0.0004723	1
ANXA4	1.49701	0.006314	0.0004741	1
VEZF1	1.49678	0.006323	0.0004749	1
EPS8	1.49745	0.006351	0.0004774	1
CEP295	1.4828	0.006354	0.0004779	1
ZNF621	1.49432	0.006355	0.0004778	1
ERI1	1.48655	0.006362	0.0004786	1
STX6	1.46951	0.006385	0.0004807	1
MITF	1.48677	0.006385	0.0004808	1
PPIG	1.49656	0.006401	0.0004823	1
ARHGAP6	1.33618	0.006402	0.0004826	1
TMEM204	1.49209	0.006403	0.000483	1
RNF146	1.48876	0.006407	0.0004834	1
DNAL4	1.51814	0.006419	0.0004846	1
ANAPC5	1.48104	0.006459	0.0004881	1
MYD88	1.49142	0.006466	0.0004888	1
PKP4	1.4817	0.006467	0.0004891	1
WWP1	1.49254	0.00648	0.0004904	1
PPBP	1.38677	0.006502	0.0004925	1
MPHOSPH9	1.48876	0.006508	0.0004931	1
RASGRP1	1.49254	0.006533	0.0004955	1
CCPG1	1.47623	0.006555	0.0004973	1
AUH	1.5186	0.006565	0.0004984	1
KIF21A	1.47645	0.006583	0.0004999	1
SYNJ2BP	1.49903	0.006591	0.0005007	1
SLC25A43	1.46563	0.006605	0.0005019	1
CCT7	1.5015	0.00663	0.000504	1
FAM117A	1.48544	0.006637	0.0005047	1
SARS1	1.48324	0.006756	0.000515	1
SRP72	1.48522	0.006758	0.0005154	1
MON2	1.47427	0.006778	0.0005173	1
NOSIP	1.48699	0.006804	0.0005195	1
INTS8	1.49365	0.006852	0.0005238	1
SDCCAG8	1.48566	0.006861	0.000525	1
GPR34	1.46843	0.006862	0.000525	1
CLIC3	1.43864	0.006881	0.0005269	1
TMEM131	1.47319	0.006935	0.0005313	1
SIGLEC1	1.56789	0.00695	0.0005332	1
SUSD3	1.49076	0.006951	0.0005331	1
DHX29	1.48017	0.00697	0.000535	1
STAM2	1.46951	0.00697	0.0005352	1
KDM1B	1.4881	0.007008	0.0005383	1
PAXIP1	1.49009	0.007014	0.0005391	1
PRKCQ-AS1	1.48192	0.007034	0.0005409	1
MRPL13	1.46349	0.007037	0.0005419	1
GSPT2	1.45645	0.007039	0.0005426	1
GDAP2	1.47929	0.007041	0.0005426	1
NDC1	1.48412	0.007045	0.0005434	1
IGKC	1.37457	0.007065	0.0005455	1
VIPAS39	1.47406	0.007085	0.0005474	1
MICOS10P1	1.47297	0.007114	0.00055	1
AGAP4	1.42857	0.007119	0.0005507	1
COPS7A	1.48544	0.007165	0.0005548	1
FKBP3	1.49499	0.007171	0.0005554	1
GAS6-AS1	1.46864	0.007178	0.0005561	1
TUBB	1.48192	0.007186	0.0005569	1
RRP15	1.45751	0.007204	0.0005585	1
HMGCR	1.45433	0.007222	0.0005601	1
LSM2	1.4758	0.007241	0.0005617	1
FUCA1	1.48126	0.007248	0.0005629	1
MACROD2	1.43699	0.007271	0.0005649	1
CD84	1.46994	0.007289	0.0005665	1
KEAP1	1.47145	0.0073	0.0005675	1
C2orf42	1.47536	0.007303	0.0005679	1
TRPV2	1.4771	0.007382	0.0005753	1
RAD51-AS1	1.47536	0.007383	0.0005753	1
COQ3	1.46606	0.007383	0.000575	1
SEC22B	1.44907	0.007386	0.000576	1
AK2	1.49454	0.00739	0.0005765	1
SAP18	1.49298	0.007406	0.000578	1
FMR1	1.47145	0.00744	0.0005813	1
ESD	1.47995	0.007458	0.0005831	1
SMAD5	1.44865	0.007498	0.0005866	1
TIAL1	1.485	0.007503	0.0005871	1
FAM78A	1.47232	0.007505	0.0005875	1
ATF2	1.48412	0.00753	0.0005898	1
NDUFB1	1.46735	0.007532	0.0005898	1
FAM200B	1.49544	0.007536	0.0005906	1
HSDL2	1.43947	0.007547	0.000592	1
ADTRP	1.33887	0.00755	0.0005919	1
SNX5	1.46778	0.007555	0.0005929	1
TMEM254	1.46477	0.007571	0.0005945	1
EIF3J	1.46972	0.007579	0.0005955	1
ATG12	1.47145	0.007587	0.0005963	1
C4orf3	1.47558	0.007627	0.0006	1
EXOC2	1.47536	0.007643	0.0006016	1
CHURC1	1.46843	0.007644	0.0006015	1
RAB31	1.48236	0.007646	0.0006022	1
ZNF30	1.48544	0.007651	0.0006029	1
INTS2	1.48965	0.007663	0.0006039	1
LEO1	1.46692	0.007672	0.0006048	1
LOC100505501	1.4637	0.007679	0.0006056	1
PLPP6	1.47189	0.007732	0.0006109	1
WDR4	1.47689	0.007741	0.0006118	1
PAAF1	1.47863	0.007747	0.0006125	1
ATPAF1	1.47167	0.007756	0.0006138	1
SLC25A17	1.48787	0.007779	0.0006157	1
SELL	1.47384	0.007788	0.0006167	1
ITPR2	1.47384	0.007814	0.0006189	1
TMEM258	1.4622	0.007818	0.0006194	1
FAM241A	1.50263	0.007827	0.0006203	1
UPF3B	1.47951	0.007837	0.0006213	1
CLNS1A	1.47776	0.007858	0.0006233	1
MRPL35	1.47842	0.007895	0.0006266	1
H2AC6	1.30548	0.007915	0.0006288	1
PIGV	1.46071	0.007937	0.000631	1
LOC286437	1.47449	0.007938	0.0006313	1
HMOX2	1.48038	0.007939	0.0006315	1
ZNF420	1.46135	0.007952	0.0006328	1
IL10RB	1.47471	0.007965	0.000634	1
MRPS11	1.46434	0.008023	0.0006392	1
IL15	1.49076	0.008041	0.0006416	1
CASP7	1.47471	0.008043	0.0006415	1
DGUOK	1.47754	0.008043	0.000642	1
NAGA	1.47167	0.008061	0.0006436	1
[truncated: 2,430 more rows]

## Sheet: E-MTAB-11415
Gene	FC	q.Value	p.Value	Direction
HBG1	2.44678	1.47e-14	6.61e-19	1
ERAF	2.50752	1.97e-14	1.78e-18	1
HBG2	2.2805	3.52e-14	4.76e-18	1
HBD	2.39292	1.01e-13	1.82e-17	1
GP6	2.14408	1.21e-11	2.72e-15	1
TSPAN18	2.10748	1.34e-10	3.63e-14	1
C1QB	1.91022	8.88e-10	2.8e-13	1
MYL4	2.03211	1.05e-09	3.79e-13	1
FBXW7	1.79083	5.8e-09	2.62e-12	1
RGS1	1.76897	6.42e-09	2.6e-12	1
HLA-DRB1	1.22459	7.48e-09	3.71e-12	1
RBM43	1.64204	1.01e-08	5.48e-12	1
PVALB	1.77809	1.1e-08	6.42e-12	1
AMMECR1	1.91205	1.11e-08	7.01e-12	1
IL4R	1.80375	2.21e-08	1.59e-11	1
RBPMS2	1.81752	3.21e-08	2.46e-11	1
DSC2	1.74764	3.31e-08	2.83e-11	1
HLA-DRB5	1.75871	3.48e-08	2.82e-11	1
PLOD2	1.71969	4.78e-08	4.31e-11	1
MYEOV	1.82682	5.72e-08	5.41e-11	1
OXTR	1.81094	6.86e-08	6.8e-11	1
SPOCD1	1.78731	7.49e-08	7.76e-11	1
CAST	1.65453	7.97e-08	8.62e-11	1
NFAT5	1.68663	9.03e-08	1.06e-10	1
SLC1A7	1.74856	9.38e-08	1.06e-10	1
NUAK1	1.74095	9.91e-08	1.21e-10	1
PDK4	1.55352	1.83e-07	2.3e-10	1
SH3KBP1	1.77778	2.27e-07	2.97e-10	1
C1QA	1.60231	2.48e-07	3.35e-10	1
RPS4Y1	1.11694	2.67e-07	3.85e-10	1
HBQ1	1.7584	2.74e-07	3.83e-10	1
HRB	1.70707	2.84e-07	4.23e-10	1
CYorf15A	1.17206	4.08e-07	6.25e-10	1
PRKY	1.12183	4.17e-07	6.57e-10	1
TMSB4Y	1.27714	4.79e-07	7.77e-10	1
TNNT1	1.57183	4.83e-07	8.06e-10	1
MMRN1	1.70474	4.93e-07	8.44e-10	1
TFPI	1.7316	4.99e-07	8.77e-10	1
OSBP2	1.657	5.22e-07	9.65e-10	1
NFIB	1.64636	5.27e-07	9.5e-10	1
JARID1D	1.12397	6.92e-07	1.31e-09	1
IRX3	1.56323	7.39e-07	1.43e-09	1
SAMD14	1.68492	8.49e-07	1.68e-09	1
PPIL3	1.60102	9.05e-07	1.84e-09	1
TUBB	1.75623	1.1e-06	2.28e-09	1
CYorf15B	1.05664	1.3e-06	2.75e-09	1
HDC	1.54178	1.31e-06	2.84e-09	1
S100P	1.59439	1.36e-06	3.01e-09	1
VWF	1.6292	1.4e-06	3.15e-09	1
DUSP4	1.62866	1.56e-06	3.58e-09	1
GP9	1.72206	1.61e-06	3.85e-09	1
EIF1AY	1.02764	1.63e-06	3.82e-09	1
SPATA13	1.44802	1.76e-06	4.28e-09	1
ACSBG1	1.65893	1.85e-06	4.58e-09	1
LGALS2	1.5868	1.96e-06	4.95e-09	1
HLA-DQB1	1.46735	1.99e-06	5.12e-09	1
FOXP1	1.61551	2.04e-06	5.33e-09	1
PROS1	1.5873	2.04e-06	5.43e-09	1
C20orf94	1.60026	2.86e-06	7.73e-09	1
TCEAL2	1.67448	3.55e-06	9.77e-09	1
TMEM45B	1.5024	3.59e-06	1e-08	1
MXRA7	1.62232	3.81e-06	1.1e-08	1
LAIR2	1.48192	3.84e-06	1.09e-08	1
RAB11FIP5	1.63827	3.92e-06	1.15e-08	1
PDGFRB	1.63106	4.62e-06	1.37e-08	1
SYTL4	1.57654	5.25e-06	1.59e-08	1
CAMP	1.20861	5.31e-06	1.63e-08	1
GSTM1	1.25376	5.97e-06	1.86e-08	1
SELP	1.60694	7.81e-06	2.47e-08	1
DNHD2	1.45096	9.07e-06	2.9e-08	1
KIAA1913	1.54823	9.69e-06	3.19e-08	1
PDZK1IP1	1.30446	1.02e-05	3.39e-08	1
CSDE1	1.63292	1.08e-05	3.66e-08	1
SLCO3A1	1.61342	1.13e-05	3.87e-08	1
NPDC1	1.62417	1.15e-05	3.99e-08	1
DPYSL4	1.28518	1.2e-05	4.22e-08	1
BIRC3	1.61603	1.26e-05	4.55e-08	1
PTPRC	1.5058	1.26e-05	4.5e-08	1
CXCL5	1.48148	1.34e-05	4.89e-08	1
UTY	1.18835	1.48e-05	5.48e-08	1
THBS1	1.54488	1.83e-05	6.84e-08	1
ITGAD	1.46391	2e-05	7.57e-08	1
TMEM158	1.52999	2.05e-05	7.85e-08	1
GZMH	1.56201	2.2e-05	8.52e-08	1
TRIM10	1.56568	2.25e-05	8.83e-08	1
DKFZp686K16132	1.35722	2.33e-05	9.22e-08	1
PI16	1.50218	2.54e-05	1.03e-07	1
TSPAN9	1.55569	2.68e-05	1.1e-07	1
TMOD1	1.54202	2.76e-05	1.15e-07	1
TSPAN33	1.61891	2.85e-05	1.19e-07	1
MAX	1.55885	3.35e-05	1.42e-07	1
CABP5	1.50534	3.46e-05	1.48e-07	1
DUSP2	1.3885	3.55e-05	1.55e-07	1
C17orf75	1.44009	3.58e-05	1.55e-07	1
GNAZ	1.57604	3.66e-05	1.62e-07	1
HOXB2	1.57629	3.99e-05	1.78e-07	1
FSTL1	1.44739	4.17e-05	1.88e-07	1
TEP1	1.11123	4.18e-05	1.9e-07	1
UCP3	1.55448	4.49e-05	2.06e-07	1
C15orf26	1.48743	4.66e-05	2.17e-07	1
MMP25	1.5015	5.07e-05	2.38e-07	1
LOC728358	1.1217	5.41e-05	2.56e-07	1
PTCRA	1.51172	5.44e-05	2.6e-07	1
CHST13	1.54607	5.47e-05	2.64e-07	1
CDK5RAP2	1.60694	6.43e-05	3.13e-07	1
NAT8B	1.53704	6.49e-05	3.19e-07	1
LOC201175	1.56691	7.49e-05	3.71e-07	1
CA1	1.47645	7.88e-05	3.94e-07	1
JSRP1	1.53752	9.62e-05	4.86e-07	1
CLOCK	1.55958	9.91e-05	5.09e-07	1
CDC2L2	1.35906	9.96e-05	5.08e-07	1
CLIC1	1.54178	0.0001029	5.34e-07	1
FAM13A1	1.54345	0.0001057	5.53e-07	1
PPP3R1	1.56715	0.0001113	5.87e-07	1
AQP9	1.52742	0.0001165	6.2e-07	1
WASF3	1.42735	0.0001204	6.52e-07	1
HSPC159	1.46908	0.0001205	6.47e-07	1
MFAP3L	1.5015	0.0001213	6.67e-07	1
SLC35D3	1.45624	0.0001213	6.62e-07	1
CLDN5	1.523	0.0001284	7.12e-07	1
NNT	1.37779	0.0001308	7.31e-07	1
GSTM3	1.25282	0.0001334	7.58e-07	1
EDG2	1.44259	0.0001343	7.57e-07	1
MAP4	1.51538	0.0001371	7.85e-07	1
ST8SIA1	1.50784	0.0001725	9.95e-07	1
BAMBI	1.47016	0.000186	1.1e-06	1
HIST1H1D	1.56421	0.0001863	1.09e-06	1
EDARADD	1.47167	0.0001934	1.16e-06	1
CTSL1	1.47275	0.0002053	1.24e-06	1
GSTT1	1.12765	0.000209	1.28e-06	1
PCSK6	1.46434	0.0002101	1.3e-06	1
FAM118A	1.05374	0.0002103	1.28e-06	1
MSL3L1	1.38026	0.0002104	1.33e-06	1
LIMS1	1.36036	0.0002111	1.31e-06	1
CTDSPL	1.44009	0.0002115	1.33e-06	1
HBS1L	1.29938	0.0002387	1.53e-06	1
MAF	1.5321	0.0002399	1.55e-06	1
CCR4	1.37344	0.0002543	1.65e-06	1
ZNF644	1.45075	0.0002642	1.73e-06	1
CLC	1.46263	0.0003091	2.05e-06	1
MMP9	1.2536	0.0003094	2.06e-06	1
RNF19	1.42146	0.0003173	2.16e-06	1
TLR2	1.45645	0.0003179	2.14e-06	1
EIF5	1.468	0.000318	2.15e-06	1
CADM1	1.42025	0.0003442	2.37e-06	1
NRG1	1.40568	0.0003729	2.59e-06	1
FADS3	1.49187	0.0003745	2.62e-06	1
IGFBP3	1.42878	0.0003821	2.69e-06	1
IL8	1.17096	0.0003855	2.73e-06	1
KRT1	1.29938	0.0004149	2.96e-06	1
DMN	1.33067	0.0004281	3.07e-06	1
MPL	1.40528	0.0004426	3.19e-06	1
KCNJ2	1.12347	0.0004441	3.22e-06	1
CDCA7	1.47732	0.0004452	3.25e-06	1
PF4V1	1.19275	0.0004721	3.47e-06	1
TMEM44	1.48214	0.0004872	3.6e-06	1
ZNF659	1.35446	0.0005408	4.02e-06	1
C1orf21	1.43287	0.0005535	4.17e-06	1
PLXND1	1.45138	0.0005545	4.15e-06	1
FLCN	1.35538	0.0005646	4.28e-06	1
BRWD1	1.36818	0.0005744	4.38e-06	1
SPRYD5	1.3611	0.0005824	4.46e-06	1
CALML4	1.46284	0.0006098	4.7e-06	1
PTRF	1.48832	0.0006194	4.8e-06	1
ANKRD57	1.40076	0.0006256	4.88e-06	1
CXorf6	1.44092	0.000631	4.95e-06	1
SLC24A3	1.1854	0.0006329	4.99e-06	1
CALD1	1.3637	0.0006413	5.09e-06	1
DHRS9	1.36724	0.0006641	5.3e-06	1
VNN1	1.31527	0.0007265	5.83e-06	1
RXRB	1.4817	0.0007359	5.94e-06	1
VAPB	1.44592	0.0008728	7.12e-06	1
LRRC6	1.43266	0.0009262	7.6e-06	1
PTGS1	1.43616	0.0009263	7.64e-06	1
MUC1	1.48765	0.0009334	7.74e-06	1
LINGO2	1.39024	0.0009383	7.83e-06	1
HES6	1.38889	0.0009715	8.15e-06	1
NOD1	1.46413	0.0009751	8.26e-06	1
HAK	1.4403	0.0009776	8.24e-06	1
PRSS23	1.41064	0.0009831	8.47e-06	1
WWOX	1.32626	0.0009833	8.42e-06	1
KIF1B	1.41884	0.0009846	8.39e-06	1
PRDM1	1.28502	0.0009892	8.56e-06	1
FOSB	1.12663	0.001008	8.77e-06	1
SLC8A3	1.37627	0.001017	8.89e-06	1
LOC283174	1.4298	0.00107	9.4e-06	1
TMEM144	1.41084	0.001093	9.65e-06	1
TMEM107	1.39704	0.001106	9.82e-06	1
SMARCD3	1.47297	0.001111	9.92e-06	1
ADM	1.40766	0.001122	1.01e-05	1
NFE2	1.43349	0.00118	1.07e-05	1
ST3GAL6	1.40017	0.001252	1.14e-05	1
ZNF365	1.29383	0.001267	1.16e-05	1
OSM	1.33833	0.001299	1.19e-05	1
FCHO2	1.31909	0.001398	1.29e-05	1
KCNK12	1.45285	0.00141	1.31e-05	1
C6orf21	1.35648	0.00144	1.34e-05	1
ATXN3	1.3077	0.001464	1.37e-05	1
BTBD14A	1.45858	0.00148	1.39e-05	1
BAG4	1.42491	0.001482	1.4e-05	1
DDX6	1.42898	0.001511	1.44e-05	1
GLB1L	1.43719	0.001555	1.49e-05	1
EPB42	1.3637	0.001561	1.5e-05	1
GFOD2	1.46413	0.001574	1.52e-05	1
PDE5A	1.40331	0.00159	1.54e-05	1
CXorf20	1.34626	0.001592	1.55e-05	1
TSRC1	1.443	0.001619	1.58e-05	1
MLH3	1.32961	0.001634	1.61e-05	1
ITGB5	1.28684	0.00172	1.7e-05	1
HIRIP3	1.443	0.001774	1.77e-05	1
ABLIM3	1.28634	0.001779	1.76e-05	1
C10orf47	1.36724	0.001867	1.87e-05	1
ATP2A3	1.38735	0.001898	1.93e-05	1
TNFSF4	1.36258	0.001899	1.94e-05	1
CD9	1.38045	0.001899	1.93e-05	1
MSRB3	1.30668	0.001905	1.96e-05	1
CCRN4L	1.40786	0.001905	1.92e-05	1
KLKB1	1.40193	0.001944	2.01e-05	1
AFAP1	1.4039	0.001961	2.03e-05	1
DAB2	1.34174	0.001983	2.06e-05	1
MGC29891	1.26662	0.00199	2.1e-05	1
MEOX1	1.36519	0.001994	2.09e-05	1
MAPK1	1.39489	0.002001	2.09e-05	1
LOC389834	1.15154	0.002003	2.12e-05	1
ZAK	1.43885	0.002011	2.18e-05	1
FAM46C	1.41703	0.002014	2.17e-05	1
HEXIM2	1.4298	0.002022	2.17e-05	1
ZDHHC20	1.24906	0.002023	2.15e-05	1
SUCNR1	1.38141	0.002029	2.17e-05	1
FLJ20309	1.35612	0.002066	2.24e-05	1
XK	1.30344	0.002089	2.28e-05	1
Gcom1	1.15433	0.00212	2.32e-05	1
TNNC2	1.3421	0.00213	2.34e-05	1
CPEB4	1.35777	0.002134	2.36e-05	1
KISS1R	1.3048	0.002182	2.42e-05	1
SASH1	1.36986	0.002186	2.43e-05	1
VENTX	1.34953	0.002239	2.5e-05	1
BPI	1.24471	0.002268	2.56e-05	1
FLJ33790	1.37836	0.002273	2.55e-05	1
HIST1H2BE	1.23655	0.00233	2.64e-05	1
AYTL1	1.3519	0.002416	2.75e-05	1
SFMBT2	1.22414	0.002459	2.81e-05	1
ANKDD1A	1.25392	0.002567	2.95e-05	1
OTUD6A	1.42674	0.002572	2.95e-05	1
HIST1H2BG	1.25235	0.002579	3e-05	1
RPS6KA3	1.25739	0.002584	2.99e-05	1
FLJ39531	1.32031	0.002588	2.99e-05	1
GPHN	1.44279	0.002658	3.1e-05	1
TM4SF1	1.3048	0.002669	3.13e-05	1
PPP2R2B	1.38735	0.002762	3.25e-05	1
ZSCAN29	1.38947	0.002826	3.34e-05	1
ANXA3	1.25565	0.002911	3.45e-05	1
C20orf127	1.3914	0.002996	3.57e-05	1
HRASLS	1.22369	0.003019	3.61e-05	1
DDEF2	1.35501	0.00302	3.62e-05	1
VNN3	1.30497	0.003022	3.67e-05	1
DACT1	1.12676	0.003023	3.65e-05	1
TRIM69	1.40825	0.003025	3.68e-05	1
COP1	1.24116	0.003027	3.64e-05	1
HOMER3	1.40076	0.003034	3.71e-05	1
TP53I3	1.40865	0.003039	3.73e-05	1
ITGA2B	1.31631	0.003055	3.76e-05	1
ST3GAL4	1.42755	0.003071	3.79e-05	1
KPNA5	1.34445	0.003112	3.86e-05	1
PLEKHK1	1.27632	0.003175	3.95e-05	1
PNMA3	1.30191	0.0033	4.12e-05	1
ASGR1	1.42918	0.003301	4.14e-05	1
MEIS1	1.28057	0.0034	4.32e-05	1
PBEF1	1.32293	0.003404	4.31e-05	1
MADD	1.43308	0.003414	4.31e-05	1
ANKRD33	1.36407	0.003415	4.3e-05	1
GABARAP	1.37722	0.003593	4.62e-05	1
ABCA1	1.39295	0.003597	4.61e-05	1
CLEC4D	1.3177	0.003611	4.66e-05	1
SGSH	1.43513	0.003614	4.68e-05	1
AHNAK	1.39704	0.003753	4.87e-05	1
HIST1H2BD	1.21021	0.003763	4.92e-05	1
LILRA3	1.31648	0.003864	5.1e-05	1
PER1	1.29786	0.003874	5.08e-05	1
GPR30	1.31337	0.003874	5.1e-05	1
TCEAL3	1.43843	0.003942	5.22e-05	1
IL12RB1	1.41643	0.003954	5.26e-05	1
TRIM2	1.35208	0.003977	5.31e-05	1
ACTA2	1.32732	0.004039	5.41e-05	1
SIPA1L1	1.42005	0.004251	5.71e-05	1
IFNG	1.25612	0.004319	5.82e-05	1
TREM1	1.38389	0.004347	5.88e-05	1
TJP2	1.3693	0.004415	5.99e-05	1
C1orf116	1.33923	0.004467	6.1e-05	1
REEP1	1.28189	0.004475	6.13e-05	1
SLC2A8	1.31961	0.004479	6.1e-05	1
DRD3	1.25786	0.004486	6.17e-05	1
MS4A3	1.26904	0.004489	6.19e-05	1
TDRD9	1.27894	0.004498	6.23e-05	1
TST	1.41343	0.004506	6.28e-05	1
C14orf132	1.28916	0.004521	6.28e-05	1
SLC5A3	1.35172	0.004534	6.34e-05	1
LY96	1.39997	0.004536	6.36e-05	1
COPG2	1.32732	0.004849	6.82e-05	1
AP1S1	1.36724	0.004869	6.89e-05	1
WDFY3	1.38274	0.004884	6.94e-05	1
SKIP	1.26279	0.004932	7.03e-05	1
Sep-04	1.34789	0.005057	7.23e-05	1
C1orf112	1.42227	0.005066	7.26e-05	1
EVA1	1.33511	0.005076	7.3e-05	1
FRMD3	1.24969	0.00526	7.59e-05	1
NR4A2	1.12714	0.005329	7.74e-05	1
MST150	1.36649	0.005344	7.73e-05	1
APOBEC3A	1.22339	0.005345	7.78e-05	1
LGR6	1.27356	0.005351	7.84e-05	1
CTSZ	1.25976	0.005357	7.82e-05	1
IL1R2	1.26984	0.00551	8.12e-05	1
PRTFDC1	1.36593	0.005519	8.11e-05	1
SPARC	1.221	0.005549	8.26e-05	1
C19orf33	1.12511	0.005552	8.23e-05	1
LOC375449	1.38389	0.005568	8.23e-05	1
HBA1	1.3519	0.005951	8.93e-05	1
FAAH2	1.32749	0.005953	8.91e-05	1
OKL38	1.35428	0.005968	8.91e-05	1
FAM14A	1.33298	0.006011	9.08e-05	1
MOBKL2C	1.39489	0.006022	9.12e-05	1
HOMER2	1.2566	0.006026	9.07e-05	1
IKZF1	1.22249	0.006081	9.24e-05	1
EGR2	1.08272	0.006086	9.27e-05	1
FLJ39822	1.30531	0.00616	9.44e-05	1
ATF3	1.27681	0.006162	9.42e-05	1
EIF2AK1	1.3947	0.006194	9.52e-05	1
GRM2	1.33547	0.006253	9.64e-05	1
SDC4	1.30242	0.006478	0.0001002	1
STYXL1	1.35026	0.006577	0.0001023	1
RAB6B	1.15062	0.006603	0.000103	1
CD63	1.38427	0.006613	0.0001034	1
C1QC	1.31961	0.006657	0.0001044	1
SPHAR	1.29752	0.006694	0.0001062	1
PTPRM	1.24131	0.006697	0.0001054	1
FLJ36492	1.2387	0.006709	0.0001059	1
ABCC3	1.31787	0.00671	0.0001068	1
DKFZp761E198	1.10363	0.006731	0.0001074	1
PAQR4	1.38427	0.006738	0.0001078	1
CD244	1.35888	0.006843	0.0001101	1
BMP2K	1.27081	0.006852	0.0001106	1
TPCN2	1.37684	0.006855	0.0001109	1
NR4A3	1.29032	0.006908	0.0001121	1
THOC5	1.36836	0.007032	0.0001144	1
C19orf59	1.31822	0.007053	0.0001151	1
LOC400986	1.01071	0.007159	0.0001171	1
DPM2	1.35943	0.007163	0.0001175	1
C9orf106	1.33085	0.007169	0.0001186	1
C8orf16	1.3151	0.007175	0.0001184	1
ME3	1.24642	0.007193	0.0001183	1
ZRANB1	1.35648	0.007403	0.0001231	1
TRPM4	1.29049	0.007417	0.000123	1
AK1	1.36968	0.007427	0.0001242	1
LOC399900	1.18092	0.007434	0.000124	1
FAM14B	1.39179	0.007677	0.0001287	1
CHAF1B	1.36073	0.007763	0.0001305	1
PAK2	1.16455	0.008115	0.0001372	1
C6orf204	1.17192	0.008117	0.0001368	1
PTGS2	1.00806	0.008214	0.0001392	1
ST6GALNAC1	1.31978	0.008278	0.0001407	1
SLC25A10	1.38754	0.008286	0.0001412	1
DHRS13	1.35044	0.008352	0.0001434	1
SLC27A4	1.39412	0.008367	0.0001433	1
EGF	1.29066	0.00843	0.0001452	1
HELB	1.20453	0.008456	0.000146	1
SCARB1	1.33333	0.008505	0.0001476	1
NQO1	1.34228	0.008508	0.0001473	1
HIST2H2AC	1.38619	0.008527	0.0001484	1
MRPL43	1.2692	0.008608	0.0001502	1
LOC401233	1.1655	0.008864	0.0001554	1
E2F2	1.34156	0.008879	0.0001553	1
C1orf150	1.35465	0.008929	0.000157	1
SH3BGRL2	1.30565	0.009028	0.0001591	1
GABARAPL1	1.36612	0.009065	0.0001606	1
TMSL8	1.36668	0.009081	0.0001605	1
COL18A1	1.13225	0.009212	0.0001636	1
C4orf18	1.32521	0.009354	0.0001665	1
CERKL	1.23747	0.009375	0.0001673	1
BTBD12	1.38658	0.009498	0.00017	1
AMD1	1.23305	0.009734	0.0001751	1
SLC26A11	1.3693	0.009745	0.0001748	1
GLYATL2	1.23808	0.01001	0.0001809	1
GAS2L1	1.20135	0.01003	0.0001822	1
PEX6	1.10108	0.01003	0.0001808	1
PIGA	1.31961	0.01005	0.000183	1
BATF	1.33369	0.01005	0.0001821	1
ZNF600	1.24224	0.0101	0.0001843	1
TIMM10	1.32328	0.01011	0.000185	1
HBB	1.36855	0.01024	0.000188	1
DENND2C	1.35373	0.01032	0.0001898	1
POMT1	1.33672	0.01034	0.0001906	1
RSU1	1.20005	0.01037	0.0001916	1
TELO2	1.35501	0.01038	0.0001923	1
GFRA2	1.30976	0.01041	0.0001933	1
LRG1	1.35483	0.01061	0.0001985	1
C14orf153	1.10816	0.01061	0.0001976	1
C5orf4	1.26839	0.01062	0.0001983	1
IQCC	1.36147	0.0108	0.0002025	1
UGCGL2	1.3421	0.01082	0.0002039	1
HIST1H1C	1.35336	0.01083	0.0002046	1
HOXB4	1.32608	0.01083	0.0002036	1
JAG1	1.3488	0.01107	0.0002095	1
KIAA1271	1.1157	0.01112	0.0002111	1
PTPRA	1.24456	0.01119	0.0002129	1
LAG3	1.28916	0.01138	0.000217	1
NT5C3L	1.35925	0.01143	0.0002185	1
KIAA0408	1.07434	0.01145	0.0002199	1
TKTL1	1.25188	0.01147	0.0002198	1
MGC50811	1.37306	0.01159	0.0002231	1
ZMYND15	1.287	0.01163	0.0002243	1
TAL1	1.30719	0.01164	0.0002252	1
FBXL5	1.34716	0.01188	0.0002302	1
ANKRD25	1.33014	0.01191	0.0002319	1
PI4KII	1.36295	0.01191	0.0002314	1
C6orf47	1.33547	0.01203	0.0002353	1
UBE2L3	1.24332	0.01205	0.0002352	1
OLFM1	1.16564	0.01212	0.0002376	1
NOTCH2NL	1.12448	0.01242	0.000244	1
SCRN2	1.35759	0.01271	0.0002509	1
RNF207	1.18217	0.01273	0.0002507	1
PAPD5	1.35722	0.01274	0.0002526	1
ZNF438	1.38639	0.01275	0.0002522	1
ARL4A	1.31822	0.01277	0.0002545	1
RCBTB2	1.23762	0.01278	0.000254	1
HIST1H2AE	1.11982	0.0128	0.0002557	1
GALNS	1.32048	0.01281	0.0002569	1
SLC25A14	1.37855	0.01283	0.0002567	1
ZNF777	1.34644	0.01287	0.0002588	1
ANKMY1	1.3077	0.01289	0.0002597	1
B3GAT1	1.26775	0.01304	0.0002634	1
FPR1	1.33905	0.01304	0.0002639	1
SOCS1	1.15115	0.0136	0.000276	1
SMOX	1.30395	0.01368	0.0002788	1
RAD21	1.23686	0.01368	0.0002781	1
PACS1	1.31182	0.01382	0.0002829	1
ZNF80	1.3009	0.01382	0.0002835	1
ZNF185	1.30736	0.01384	0.0002826	1
ALPL	1.22399	0.01392	0.0002868	1
DCLRE1A	1.31062	0.01394	0.0002878	1
ARHGAP18	1.24797	0.01394	0.0002865	1
FECH	1.30719	0.01395	0.0002887	1
SDSL	1.28766	0.01407	0.0002917	1
NCKAP1	1.35612	0.0141	0.0002931	1
FHL2	1.22504	0.0141	0.0002936	1
PROK2	1.23686	0.01413	0.0002948	1
C10orf35	1.31822	0.01431	0.0003	1
NFIL3	1.29685	0.01432	0.0003009	1
CLEC1B	1.26072	0.01433	0.0002997	1
GUSBL2	1.33779	0.01453	0.0003059	1
ARHGAP21	1.34318	0.01457	0.00031	1
C7orf41	1.27943	0.01457	0.0003074	1
PLD1	1.2875	0.01458	0.0003095	1
IFT122	1.3421	0.0146	0.0003086	1
TMEM79	1.32749	0.01471	0.0003137	1
CTSG	1.17069	0.01472	0.0003151	1
GLT25D2	1.13507	0.01479	0.0003173	1
STAU1	1.18892	0.01491	0.0003206	1
C6orf64	1.33014	0.01492	0.0003214	1
IKZF3	1.25834	0.015	0.0003245	1
FYTTD1	1.27894	0.01505	0.0003263	1
EDG8	1.23747	0.01505	0.000327	1
C6orf150	1.18554	0.01521	0.0003311	1
UNC119	1.35593	0.01533	0.0003351	1
LOC196264	1.36612	0.01571	0.0003449	1
CYP4F3	1.16877	0.01573	0.0003445	1
HDGFRP3	1.28041	0.01585	0.0003495	1
TUBA1C	1.3541	0.01585	0.0003487	1
FLJ22028	1.33529	0.01592	0.000353	1
C17orf55	1.22714	0.01595	0.0003524	1
NGFRAP1	1.23381	0.01595	0.000353	1
FAM76A	1.35667	0.01595	0.0003552	1
FLJ14213	1.30191	0.01598	0.0003552	1
MGLL	1.20802	0.01604	0.000358	1
CMTM4	1.34048	0.01605	0.0003587	1
TREML4	1.18991	0.01607	0.0003601	1
PGLYRP1	1.04855	0.01627	0.0003653	1
FLJ22531	1.30005	0.01691	0.000381	1
FLJ43339	1.32996	0.01727	0.0003909	1
UBXD4	1.34282	0.0173	0.0003906	1
PPIE	1.29651	0.01771	0.0004015	1
TMEM127	1.32205	0.018	0.0004088	1
NINJ2	1.29921	0.01801	0.00041	1
C1orf38	1.25188	0.01806	0.0004128	1
C1orf198	1.20482	0.01806	0.0004119	1
LRRC20	1.34409	0.01808	0.000414	1
TIRAP	1.19962	0.01845	0.0004233	1
RGS18	1.25676	0.01854	0.0004295	1
CPSF1	1.30599	0.01854	0.0004288	1
TNFRSF10D	1.24131	0.01856	0.0004274	1
AKT1S1	1.32468	0.01857	0.0004285	1
PEX26	1.32538	0.01857	0.000431	1
MARCO	1.18596	0.01859	0.0004274	1
TMEM11	1.32083	0.01864	0.0004335	1
SLAMF8	1.24595	0.0187	0.0004366	1
TMEM40	1.28568	0.01872	0.0004363	1
MPP1	1.30191	0.01873	0.0004381	1
C3orf40	1.3552	0.0189	0.0004431	1
ARHGEF12	1.29116	0.01921	0.0004512	1
SLC11A1	1.25188	0.01934	0.000455	1
MGC52282	1.11869	0.01936	0.0004573	1
FNBP1L	1.29769	0.01938	0.0004568	1
ANG	1.21139	0.01959	0.0004637	1
FLJ20054	1.33976	0.01967	0.0004664	1
KCNT1	1.28883	0.0198	0.0004704	1
CTLA4	1.29719	0.01985	0.0004733	1
MCF2	1.3344	0.01986	0.0004728	1
CMTM5	1.22085	0.02013	0.0004809	1
P2RY12	1.30548	0.02025	0.0004847	1
TMEM121	1.29769	0.02031	0.0004871	1
HTRA1	1.28469	0.02051	0.0004927	1
PALLD	1.31822	0.02054	0.0004954	1
AKAP9	1.10047	0.02054	0.0004944	1
ZNF467	1.35245	0.02059	0.0005003	1
RAB32	1.31648	0.02062	0.0005001	1
HIST1H2AD	1.2133	0.02062	0.000499	1
ZNF418	1.23396	0.02063	0.0004983	1
ZNF683	1.02386	0.02078	0.0005059	1
SIGLEC5	1.16158	0.02083	0.0005081	1
GM2A	1.32873	0.02091	0.0005108	1
DENND1A	1.31909	0.02092	0.000513	1
TOX	1.35208	0.02107	0.0005177	1
ZNF669	1.21433	0.0214	0.0005276	1
NOTCH1	1.32031	0.02153	0.0005318	1
C14orf80	1.3231	0.02159	0.0005343	1
CMTM1	1.29333	0.02168	0.0005374	1
WDR79	1.33458	0.02176	0.0005404	1
RNF150	1.18469	0.02184	0.0005435	1
RP11-49G10.8	1.30685	0.02195	0.0005471	1
LY6G6D	1.35851	0.02196	0.0005495	1
SLC6A4	1.27405	0.02199	0.0005491	1
SDPR	1.24208	0.0223	0.0005589	1
LEPREL2	1.27275	0.02239	0.0005631	1
EYA3	1.16973	0.02241	0.0005627	1
HIST1H2BH	1.13572	0.02252	0.0005696	1
RORA	1.32521	0.02255	0.0005692	1
TREML1	1.25251	0.02255	0.0005683	1
MCTP1	1.20715	0.02256	0.0005727	1
OGDH	1.23426	0.02259	0.0005722	1
KLF6	1.23031	0.0226	0.0005745	1
C19orf44	1.25188	0.02275	0.0005794	1
SESN3	1.29685	0.02283	0.0005824	1
S100A6	1.32784	0.0229	0.0005853	1
C3AR1	1.27567	0.02321	0.0005964	1
ASB7	1.33743	0.02323	0.000596	1
CPT1A	1.3089	0.02326	0.0005955	1
RAB38	1.27421	0.02326	0.0005988	1
IFT57	1.31251	0.02335	0.000602	1
TAP2	1.13417	0.02378	0.0006163	1
PID1	1.18906	0.02431	0.0006311	1
CLU	1.24813	0.02457	0.000639	1
C3orf54	1.30276	0.02462	0.0006416	1
TIMM8B	1.21877	0.02474	0.0006457	1
NAPRT1	1.26711	0.02476	0.0006472	1
SLC41A3	1.33209	0.02478	0.0006523	1
KATNAL1	1.30344	0.02479	0.0006516	1
PAPSS2	1.0755	0.02479	0.0006537	1
TAF15	1.21344	0.02483	0.0006514	1
MICB	1.30463	0.02501	0.0006606	1
LMNA	1.29349	0.02513	0.0006648	1
KLF10	1.26775	0.02526	0.0006696	1
MAP3K10	1.29366	0.02555	0.0006782	1
ENPP5	1.25755	0.02561	0.0006812	1
GNG11	1.2692	0.02599	0.0006947	1
C12orf48	1.32873	0.02601	0.0006929	1
PRKDC	1.22775	0.02603	0.0006947	1
DAPK2	1.33565	0.02623	0.0007025	1
KIF13A	1.27486	0.02627	0.0007046	1
KCNJ15	1.3048	0.02653	0.0007139	1
PPP2R2D	1.28733	0.02659	0.0007167	1
KCTD7	1.1632	0.0266	0.0007182	1
HOXD3	1.31874	0.02676	0.0007237	1
C3orf60	1.32837	0.02713	0.000735	1
MGC13057	1.25078	0.02787	0.0007562	1
CEACAM3	1.16836	0.02798	0.0007619	1
C9orf72	1.27828	0.02802	0.0007617	1
PITPNA	1.21551	0.02806	0.0007691	1
IL8RB	1.2219	0.02808	0.0007684	1
KIAA1324	1.28008	0.02812	0.0007669	1
GDF11	1.29016	0.02812	0.0007683	1
EPDR1	1.24828	0.02844	0.0007806	1
CBX3	1.24347	0.02852	0.0007932	1
CHST2	1.27	0.02852	0.0007919	1
TSHZ3	1.30993	0.02854	0.0007913	1
CDC14B	1.19674	0.02854	0.000795	1
TUBB1	1.24193	0.02854	0.0007885	1
TMEM30B	1.28156	0.02855	0.0007902	1
RNF122	1.28932	0.02855	0.0007862	1
TRPV4	1.3224	0.02857	0.0007986	1
PSRC1	1.29049	0.02858	0.0007883	1
HNMT	1.32135	0.02859	0.0007861	1
CECR6	1.23824	0.0286	0.000798	1
CD52	1.3101	0.02879	0.0008072	1
CLIC5	1.23442	0.02883	0.000807	1
TMEM45A	1.15634	0.02899	0.0008141	1
PDGFC	1.25786	0.02901	0.0008173	1
ZNF652	1.16023	0.02905	0.0008173	1
CTSF	1.29132	0.02921	0.0008255	1
TMEM140	1.25031	0.02924	0.000825	1
KIR2DL4	1.17744	0.02946	0.0008381	1
MYBPC3	1.26646	0.02947	0.000837	1
CACNA2D2	1.28883	0.02951	0.0008354	1
FAM33A	1.31216	0.02958	0.0008426	1
WWP2	1.32696	0.02971	0.0008478	1
ZFAND2A	1.32556	0.02976	0.0008532	1
TMEM106C	1.33994	0.0298	0.0008531	1
HIST1H2BF	1.167	0.02983	0.0008525	1
WWC1	1.27812	0.03013	0.0008651	1
DGAT2	1.31441	0.03014	0.0008669	1
AFAP1L2	1.23931	0.03014	0.0008681	1
CDKN1A	1.26952	0.03014	0.0008695	1
ATF5	1.29938	0.03026	0.0008744	1
MGC70863	1.12007	0.03041	0.0008802	1
GNL1	1.31648	0.03095	0.0008985	1
GALE	1.28667	0.03098	0.0009006	1
PSMD8	1.32363	0.03098	0.0009023	1
PVR	1.27226	0.031	0.0009041	1
HILS1	1.317	0.0311	0.0009085	1
ST3GAL3	1.29333	0.03151	0.0009234	1
RNASE4	1.17897	0.03152	0.000925	1
C1orf9	1.10302	0.03176	0.0009333	1
ZDHHC16	1.11346	0.03264	0.0009622	1
KIR2DL3	1.18638	0.0327	0.0009685	1
ZHX3	1.32205	0.03271	0.0009673	1
STARD8	1.30327	0.03274	0.0009711	1
GPR172A	1.3344	0.03278	0.0009738	1
GNLY	1.17	0.03321	0.000988	1
CDKL1	1.28337	0.0333	0.0009922	1
CA5A	1.19933	0.03336	0.0009956	1
AMDHD1	1.22594	0.0336	0.001004	1
FOLR3	1.02627	0.03374	0.00101	1
LOC401620	1.10156	0.03408	0.001022	1
WDR41	1.18175	0.03428	0.001031	1
C5orf32	1.17123	0.03433	0.001031	1
FLJ37538	1.05064	0.03449	0.001038	1
DCAKD	1.33994	0.03486	0.001053	1
MC1R	1.26024	0.03508	0.001061	1
DCBLD1	1.2955	0.03524	0.001069	1
EXOSC6	1.30804	0.03529	0.001069	1
GOLPH2	1.22549	0.03546	0.001077	1
C20orf55	1.31354	0.03558	0.001084	1
SH3GL1	1.29049	0.03562	0.001084	1
LEFTY1	1.18751	0.03568	0.001089	1
FHL1	1.22579	0.03582	0.0011	1
FOXD2	1.24844	0.03585	0.001099	1
IFIT1L	1.23808	0.03589	0.001098	1
PIGF	1.31527	0.0359	0.001097	1
MIZF	1.23594	0.03601	0.001109	1
GPR34	1.18666	0.03601	0.001107	1
FLJ35220	1.30924	0.03604	0.001111	1
ARRDC4	1.26167	0.03605	0.001117	1
MIF4GD	1.317	0.03609	0.001116	1
KIAA1794	1.25929	0.03614	0.001116	1
RDBP	1.29971	0.03625	0.001126	1
RASSF4	1.30073	0.03627	0.001125	1
HES4	1.16959	0.03638	0.001131	1
LCN2	1.1636	0.03652	0.001138	1
AGPAT1	1.27779	0.03699	0.001154	1
RASIP1	1.19318	0.03712	0.00116	1
C3orf59	1.30141	0.03725	0.001165	1
C14orf145	1.29702	0.03733	0.001173	1
TNS1	1.30959	0.03737	0.001176	1
C9orf66	1.27584	0.03737	0.001171	1
PARD6G	1.31978	0.03738	0.001173	1
FLJ37396	1.12057	0.03761	0.001185	1
PRMT2	1.24533	0.03796	0.001198	1
TNFRSF19L	1.23594	0.03813	0.001207	1
SLC2A6	1.2837	0.03814	0.001205	1
SSX2IP	1.26904	0.03875	0.001228	1
KCNG1	1.15022	0.03915	0.001242	1
ASF1B	1.19489	0.03922	0.001247	1
CEPT1	1.14469	0.03937	0.001264	1
ICA1	1.29032	0.0394	0.001263	1
GMPR	1.23548	0.03941	0.001261	1
GINS2	1.25755	0.03942	0.001267	1
ZNF174	1.2945	0.03945	0.001261	1
PPWD1	1.2655	0.03948	0.00126	1
TARBP2	1.30259	0.03953	0.00126	1
MAP6D1	1.30804	0.03953	0.001258	1
NBPF14	1.00806	0.03966	0.001276	1
SLITRK4	1.25047	0.03979	0.001282	1
PLA2G4A	1.23168	0.03998	0.00129	1
NDST1	1.23016	0.04023	0.001302	1
HIST1H2BJ	1.17467	0.04025	0.001301	1
ZFP37	1.24224	0.04048	0.001312	1
ZMYND12	1.22264	0.04066	0.00132	1
EGR1	1.05775	0.0407	0.001323	1
PADI4	1.27551	0.04078	0.001327	1
GTF2H4	1.29299	0.04098	0.001336	1
SORT1	1.25834	0.04108	0.001341	1
PLOD1	1.31337	0.04129	0.00135	1
CHN1	1.23778	0.04154	0.00136	1
ZNF672	1.28932	0.0416	0.001363	1
BST1	1.18301	0.04164	0.001367	1
CLN8	1.06304	0.04169	0.00137	1
TUBA8	1.24471	0.0417	0.001372	1
FPRL2	1.17841	0.04206	0.00139	1
DUSP1	1.16877	0.04206	0.001393	1
CD3G	1.25676	0.0421	0.001389	1
CNTNAP1	1.23762	0.04211	0.001393	1
SELS	1.31199	0.04215	0.001389	1
LOC196752	1.30327	0.0424	0.001407	1
RIMS4	1.11371	0.0427	0.001419	1
EZH2	1.24502	0.04279	0.001423	1
SQRDL	1.27065	0.04289	0.001429	1
KIAA1875	1.23993	0.0429	0.001431	1
UBL4A	1.26231	0.04374	0.001463	1
HMOX1	1.25881	0.0441	0.001483	1
C1orf97	1.23289	0.04415	0.001483	1
C1orf82	1.23031	0.04416	0.001479	1
ANGPT1	1.20467	0.04419	0.001482	1
CCDC106	1.22745	0.0442	0.001488	1
FLJ45337	1.22971	0.04436	0.001498	1
DAP	1.30634	0.04438	0.001497	1
MTCH2	1.3101	0.04494	0.001519	1
SH2B1	1.26072	0.04577	0.001551	1
JAM3	1.15009	0.04582	0.001551	1
PTGER2	1.29836	0.04587	0.001557	1
ACOT4	1.15915	0.04589	0.00156	1
PEX11G	1.27146	0.04591	0.001563	1
LATS2	1.16185	0.04608	0.00157	1
SERPING1	1.11832	0.04609	0.001573	1
MAP4K5	1.31475	0.04622	0.001581	1
TNF	1.1485	0.04624	0.00158	1
SHMT1	1.26422	0.04651	0.001595	1
SNCA	1.23138	0.04653	0.001594	1
LTBP1	1.1773	0.04734	0.001626	1
GK	1.28766	0.04753	0.001637	1
PTPRE	1.20135	0.04755	0.001635	1
KIR3DL2	1.05597	0.04766	0.001648	1
CD83	1.11495	0.04772	0.001648	1
SIRT7	1.27194	0.04775	0.001646	1
PCNX	1.32485	0.04793	0.001659	1
ZNF354A	1.23183	0.048	0.001664	1
CTTN	1.18273	0.04808	0.001669	1
KCTD12	1.24023	0.04819	0.001675	1
TTC16	1.22264	0.04826	0.00168	1
NR1H3	1.28502	0.0485	0.001692	1
VSIG4	1.26711	0.04856	0.001692	1
NR2F6	1.22986	0.04864	0.001699	1
RAB20	1.22041	0.04878	0.001706	1
C14orf169	1.3048	0.04881	0.00171	1
LOC728744	1.20685	0.04905	0.001738	1
C19orf12	1.0502	0.04905	0.001729	1
N4BP2	1.21183	0.04908	0.001741	1
F13A1	1.18666	0.04909	0.001728	1
MRPS18A	1.27779	0.04909	0.001726	1
SPTBN5	1.26646	0.04911	0.001738	1
NUSAP1	1.29182	0.04913	0.001725	1
LAMC3	1.17897	0.04916	0.001735	1
OVGP1	1.24208	0.04938	0.001756	1
CLEC12A	1.01235	0.04944	0.001756	1
CD248	0.538503	1.48e-08	1.33e-12	-1
ZNF679	0.59453	1.86e-08	8.37e-13	-1
LRRN3	0.544959	8.83e-08	1.19e-11	-1
NOG	0.532765	1.29e-07	2.33e-11	-1
CENTB5	0.538213	1.49e-07	4.03e-11	-1
RHPN1	0.550055	1.68e-07	3.78e-11	-1
FAM100A	0.543774	3.04e-07	9.6e-11	-1
SMARCC2	0.545256	3.22e-07	1.16e-10	-1
CXCR4	0.669792	5.6e-07	2.27e-10	-1
MYOM2	0.947867	1.37e-06	7.41e-10	-1
FBLN2	0.576701	1.42e-06	7.06e-10	-1
AHDC1	0.574383	1.78e-06	1.04e-09	-1
P2RX5	0.591366	2.14e-06	1.35e-09	-1
FGD2	0.641026	2.49e-06	1.69e-09	-1
LYPD2	0.607903	2.55e-06	1.84e-09	-1
ATHL1	0.610874	3.15e-06	2.7e-09	-1
ZNF121	0.668449	3.6e-06	3.25e-09	-1
LENG8	0.57241	4.05e-06	4.02e-09	-1
UCP2	0.596303	4.88e-06	5.05e-09	-1
JOSD2	0.594177	5.22e-06	5.65e-09	-1
LOC399744	0.623441	5.95e-06	6.71e-09	-1
USMG5	0.738552	7.76e-06	9.09e-09	-1
CEL	0.622665	8.79e-06	1.07e-08	-1
SPPL2B	0.606061	9.13e-06	1.15e-08	-1
NCF1	0.611247	9.16e-06	1.2e-08	-1
FASTK	0.643087	1.01e-05	1.37e-08	-1
JARID1C	0.620732	1.11e-05	1.55e-08	-1
CRTC1	0.59988	1.17e-05	1.69e-08	-1
NRCAM	0.620732	1.23e-05	2e-08	-1
MAPK8IP1	0.722543	1.24e-05	1.91e-08	-1
C19orf6	0.677048	1.26e-05	1.87e-08	-1
IGJ	0.661813	1.27e-05	2.52e-08	-1
PHF1	0.632511	1.29e-05	2.5e-08	-1
CD79B	0.638978	1.29e-05	2.44e-08	-1
CTDSP1	0.604961	1.3e-05	2.34e-08	-1
NLRC5	0.689655	1.32e-05	2.2e-08	-1
ACTG1	0.710732	1.33e-05	2.33e-08	-1
AEBP1	0.606428	1.4e-05	2.85e-08	-1
PARP10	0.648088	1.42e-05	2.93e-08	-1
MGRN1	0.617284	1.47e-05	3.11e-08	-1
POMZP3	0.654022	1.51e-05	3.28e-08	-1
AMY2B	0.707214	1.76e-05	4.06e-08	-1
CD79A	0.638162	1.8e-05	4.05e-08	-1
IDUA	0.616143	1.83e-05	4.05e-08	-1
LOC442535	0.693001	1.89e-05	4.43e-08	-1
NUAK2	0.618429	2.05e-05	4.89e-08	-1
INPP4A	0.64433	2.58e-05	6.51e-08	-1
TMEM176A	0.909918	2.6e-05	6.45e-08	-1
CD74	0.634115	2.75e-05	7.06e-08	-1
ARHGEF1	0.641026	2.83e-05	7.4e-08	-1
DDX3Y	0.878735	3.96e-05	1.07e-07	-1
NUP43	0.802568	3.98e-05	1.06e-07	-1
RASSF1	0.708717	4.51e-05	1.24e-07	-1
DUSP6	0.775795	4.62e-05	1.29e-07	-1
IIP45	0.645161	4.62e-05	1.33e-07	-1
TBC1D17	0.639386	4.67e-05	1.33e-07	-1
ID3	0.685871	4.95e-05	1.47e-07	-1
SCML4	0.640205	4.96e-05	1.45e-07	-1
NLRP2	0.755287	5.21e-05	1.57e-07	-1
TNFRSF17	0.699301	5.87e-05	1.88e-07	-1
USH1G	0.770416	5.88e-05	1.91e-07	-1
USF2	0.65703	5.93e-05	1.87e-07	-1
USP9Y	0.97561	5.97e-05	1.86e-07	-1
UNC93B1	0.65189	6.1e-05	2.06e-07	-1
CLEC11A	0.657462	6.18e-05	2.06e-07	-1
CD8A	0.705219	6.18e-05	2.04e-07	-1
TPM2	0.659631	7.62e-05	2.61e-07	-1
PCDHGA1	0.814996	7.75e-05	2.69e-07	-1
KRT72	0.766871	8.28e-05	2.91e-07	-1
CDK5RAP3	0.748503	9.56e-05	3.4e-07	-1
THOC4	0.707214	9.86e-05	3.56e-07	-1
ABCB8	0.647249	0.0001157	4.28e-07	-1
LTBP3	0.656168	0.0001158	4.23e-07	-1
SLC16A11	0.651042	0.0001194	4.52e-07	-1
NT5E	0.702741	0.00016	6.13e-07	-1
MBD2	0.651466	0.0001637	6.35e-07	-1
OR1Q1	0.77101	0.0001652	6.48e-07	-1
ZNF3	0.677507	0.0001709	6.86e-07	-1
CD3D	0.721501	0.0001748	7.09e-07	-1
OAS1	0.77101	0.000178	7.38e-07	-1
IL7R	0.645995	0.0001789	7.5e-07	-1
C21orf66	0.674309	0.0001802	7.64e-07	-1
TMEM16J	0.70028	0.0001804	7.81e-07	-1
PILRB	0.78125	0.0001817	7.78e-07	-1
RPL10A	0.658328	0.0001922	8.4e-07	-1
D4S234E	0.720981	0.0001949	8.61e-07	-1
BCL3	0.682128	0.0002086	9.31e-07	-1
COL6A2	0.709723	0.0002186	9.86e-07	-1
CGI-38	0.733676	0.0002395	1.11e-06	-1
C20orf59	0.662691	0.0002407	1.11e-06	-1
NOC4L	0.652742	0.0002409	1.13e-06	-1
LTK	0.65189	0.000241	1.1e-06	-1
EEF1B2	0.750751	0.0002543	1.23e-06	-1
RAB15	0.671592	0.0002545	1.25e-06	-1
CLEC4F	0.890472	0.0002553	1.22e-06	-1
CLEC2D	0.948767	0.000256	1.25e-06	-1
CCT6A	0.761035	0.0002604	1.29e-06	-1
CACHD1	0.65445	0.0002651	1.33e-06	-1
ABCD1	0.66357	0.0002792	1.41e-06	-1
HLA-C	0.768049	0.0002894	1.47e-06	-1
TCP1	0.78125	0.0002943	1.51e-06	-1
CSF3R	0.70028	0.0003282	1.73e-06	-1
RTEL1	0.665336	0.0003297	1.72e-06	-1
CLK1	0.717875	0.0003308	1.72e-06	-1
IRF5	0.832639	0.0003468	1.85e-06	-1
CDC42EP2	0.711744	0.0003508	1.99e-06	-1
ACCN5	0.87184	0.0003512	1.96e-06	-1
CAMK2B	0.688231	0.0003525	1.99e-06	-1
CPNE5	0.707714	0.0003531	1.94e-06	-1
TCF7	0.65445	0.0003532	1.96e-06	-1
SIRPG	0.69735	0.0003552	1.91e-06	-1
SLC25A22	0.664894	0.0003553	1.94e-06	-1
ACTB	0.70922	0.0003561	1.93e-06	-1
ARHGAP30	0.719942	0.0003797	2.17e-06	-1
LOC441193	0.732601	0.0003864	2.25e-06	-1
OSBPL7	0.671592	0.0003915	2.33e-06	-1
SYTL1	0.675676	0.0003922	2.3e-06	-1
TMEM16H	0.688231	0.0003925	2.32e-06	-1
FLJ36208	0.670691	0.0004117	2.49e-06	-1
NFIC	0.882613	0.0004131	2.48e-06	-1
C1orf43	0.728863	0.0004161	2.53e-06	-1
TGFBR2	0.806452	0.0004422	2.71e-06	-1
ROBO3	0.67981	0.000446	2.8e-06	-1
AK5	0.688705	0.0004472	2.76e-06	-1
CR2	0.692521	0.0004762	3.03e-06	-1
ATN1	0.705716	0.0004766	3.01e-06	-1
NPIP	0.700771	0.0004787	3.06e-06	-1
PKM2	0.721501	0.0004885	3.17e-06	-1
TSPAN3	0.712758	0.0004885	3.15e-06	-1
DYRK1B	0.680272	0.0004943	3.23e-06	-1
CD3E	0.678426	0.0005167	3.4e-06	-1
IFI44L	0.766871	0.0005421	3.62e-06	-1
BCL2L1	0.720461	0.0005579	3.8e-06	-1
ITM2C	0.665779	0.0005605	3.76e-06	-1
ARHGAP6	0.853971	0.0005613	3.8e-06	-1
UBE2I	0.737463	0.0005618	3.87e-06	-1
ELA1	0.712758	0.0005635	3.86e-06	-1
C10orf61	0.695894	0.0005793	4.05e-06	-1
C11orf35	0.750188	0.0005817	4.04e-06	-1
HMGN2	0.717875	0.000595	4.18e-06	-1
PRR5	0.674309	0.0006085	4.31e-06	-1
TSPYL2	0.725689	0.0006471	4.61e-06	-1
CCNC	0.734754	0.0006737	4.83e-06	-1
CCNT1	0.701754	0.0007028	5.07e-06	-1
LOC729264	0.857633	0.0007353	5.34e-06	-1
IBRDC3	0.73046	0.0007392	5.4e-06	-1
ZNF345	0.73046	0.0007587	5.61e-06	-1
ALDOA	0.742942	0.0007623	5.6e-06	-1
POU2AF1	0.696379	0.0007737	5.76e-06	-1
MACF1	0.858369	0.0008118	6.08e-06	-1
KCTD13	0.679348	0.0008183	6.16e-06	-1
RELA	0.698324	0.000884	6.7e-06	-1
SH2B2	0.683527	0.0008852	6.74e-06	-1
TLR9	0.682128	0.0009033	6.92e-06	-1
CCDC95	0.694927	0.0009151	7.05e-06	-1
PSMC4	0.760456	0.0009296	7.21e-06	-1
MANEA	0.74239	0.0009391	7.32e-06	-1
ZNF580	0.708717	0.0009479	7.44e-06	-1
G6PD	0.687285	0.0009581	7.56e-06	-1
PLEC1	0.690608	0.001049	8.37e-06	-1
UBE2L6	0.732064	0.001096	8.79e-06	-1
FAM101B	0.678887	0.001109	8.95e-06	-1
RPLP0	0.720981	0.001124	9.12e-06	-1
GZMM	0.714796	0.001188	9.74e-06	-1
LSP1	0.700771	0.001194	9.91e-06	-1
SLC2A14	0.835422	0.001249	1.05e-05	-1
CCT7	0.755287	0.001249	1.04e-05	-1
GRINA	0.687758	0.001252	1.06e-05	-1
SORBS3	0.693481	0.001295	1.1e-05	-1
MID1IP1	0.694927	0.001295	1.1e-05	-1
RORC	0.724113	0.001328	1.15e-05	-1
USP53	0.714286	0.001334	1.15e-05	-1
OPN3	0.710732	0.00134	1.15e-05	-1
MLL3	0.755858	0.001354	1.18e-05	-1
LRAP	0.862813	0.001368	1.2e-05	-1
LOC113179	0.696864	0.001368	1.2e-05	-1
DBP	0.682128	0.001529	1.35e-05	-1
DCHS1	0.704225	0.001578	1.41e-05	-1
CCM2	0.814996	0.001579	1.4e-05	-1
ARRDC1	0.683527	0.001596	1.43e-05	-1
BSG	0.722022	0.001603	1.46e-05	-1
CXCR6	0.81367	0.001604	1.48e-05	-1
DERL3	0.693001	0.001604	1.47e-05	-1
ZNF444	0.710227	0.001605	1.45e-05	-1
TAS2R45	0.753012	0.001608	1.45e-05	-1
ECGF1	0.747384	0.001732	1.62e-05	-1
FKSG30	0.70373	0.001766	1.66e-05	-1
JAK1	0.766871	0.001769	1.67e-05	-1
BANF1	0.709723	0.001776	1.68e-05	-1
CLDN15	0.708717	0.001783	1.7e-05	-1
ZNF567	0.706215	0.001802	1.72e-05	-1
GPAA1	0.701262	0.001915	1.86e-05	-1
PPARD	0.70922	0.001929	1.88e-05	-1
PDE4B	0.829187	0.001977	1.94e-05	-1
PPHLN1	0.902527	0.001977	1.93e-05	-1
LGALS3	0.751315	0.001984	1.96e-05	-1
C8orf13	0.77821	0.001994	1.99e-05	-1
CLEC4C	0.691563	0.001997	2e-05	-1
ABCA2	0.722543	0.001998	1.98e-05	-1
EPHB1	0.688705	0.002012	2.02e-05	-1
TNFRSF13B	0.729927	0.002115	2.14e-05	-1
CNTNAP2	0.921659	0.002169	2.2e-05	-1
SMA4	0.773994	0.00223	2.27e-05	-1
TP53	0.727273	0.002304	2.36e-05	-1
DIP2A	0.732064	0.002411	2.48e-05	-1
GIYD2	0.760456	0.002446	2.53e-05	-1
MRE11A	0.811688	0.002473	2.56e-05	-1
OR2A1	0.776398	0.002474	2.58e-05	-1
TNRC6A	0.704722	0.002499	2.63e-05	-1
FAM21C	0.814996	0.0026	2.76e-05	-1
NBEA	0.734214	0.002606	2.75e-05	-1
IL12RB2	0.780031	0.002627	2.8e-05	-1
AGPAT2	0.718907	0.002681	2.86e-05	-1
SPINK2	0.696379	0.002686	2.88e-05	-1
TBC1D3	0.838926	0.002915	3.14e-05	-1
ZP3	0.761615	0.002989	3.23e-05	-1
C1orf56	0.751315	0.003045	3.31e-05	-1
KIR2DL1	0.99108	0.003085	3.37e-05	-1
TMEM63A	0.711238	0.003118	3.42e-05	-1
TSC22D1	0.94518	0.003186	3.52e-05	-1
GATAD2B	0.708717	0.003236	3.6e-05	-1
OBSCN	0.744602	0.003252	3.64e-05	-1
DNHD1	0.715308	0.003253	3.65e-05	-1
ZNF43	0.749064	0.003287	3.7e-05	-1
RSAD2	0.783085	0.003322	3.76e-05	-1
PDE1A	0.861326	0.003396	3.89e-05	-1
GSTM2	0.78064	0.003396	3.86e-05	-1
CD8B1	0.819672	0.0034	3.88e-05	-1
SUV420H1	0.757576	0.003419	3.93e-05	-1
PSMB8	0.749625	0.003461	3.99e-05	-1
MATK	0.789266	0.003486	4.04e-05	-1
FCRL2	0.734754	0.003758	4.42e-05	-1
SURF5	0.727802	0.003772	4.42e-05	-1
ANXA2	0.785546	0.003785	4.42e-05	-1
EI24	0.705716	0.00383	4.52e-05	-1
CD22	0.747384	0.003833	4.55e-05	-1
ZC3H3	0.711238	0.003839	4.57e-05	-1
TIMP2	0.745712	0.003866	4.62e-05	-1
ZAP70	0.807754	0.003884	4.66e-05	-1
ANKRD15	0.87184	0.004177	5.03e-05	-1
JUP	0.801282	0.0042	5.07e-05	-1
NSUN5C	0.748503	0.004328	5.27e-05	-1
DKFZP434A0131	0.746826	0.004446	5.43e-05	-1
HIST1H2AC	0.870322	0.004656	5.71e-05	-1
USP6	0.747384	0.004673	5.75e-05	-1
SPRY1	0.746826	0.004686	5.79e-05	-1
SMYD2	0.748503	0.004689	5.81e-05	-1
NFIX	0.78064	0.004927	6.13e-05	-1
FOS	0.93633	0.00494	6.19e-05	-1
PLEKHB2	0.773994	0.004951	6.18e-05	-1
S100PBP	0.740192	0.005082	6.39e-05	-1
CD37	0.700771	0.00511	6.45e-05	-1
BLK	0.745712	0.005368	6.8e-05	-1
AVP	0.777605	0.005517	7.04e-05	-1
HM13	0.798722	0.005614	7.19e-05	-1
HERC3	0.757576	0.005721	7.35e-05	-1
DHX9	0.829876	0.005731	7.42e-05	-1
GPR18	0.765697	0.005788	7.51e-05	-1
SLC27A6	0.793651	0.005839	7.63e-05	-1
FMO2	0.783085	0.005849	7.67e-05	-1
TAOK2	0.771605	0.005869	7.73e-05	-1
PKD1	0.738552	0.005923	7.82e-05	-1
OSBPL10	0.742942	0.005945	7.91e-05	-1
TAF1C	0.755287	0.00602	8.03e-05	-1
MS4A1	0.774593	0.006027	8.12e-05	-1
LGALS9	0.729395	0.006045	8.12e-05	-1
EDG6	0.715308	0.006053	8.19e-05	-1
BCL9L	0.720461	0.006053	8.1e-05	-1
POLR3G	0.876424	0.006171	8.37e-05	-1
RANBP3	0.720461	0.006215	8.46e-05	-1
HAVCR1	0.716846	0.006307	8.64e-05	-1
DNAJB14	0.796178	0.006315	8.68e-05	-1
CARM1	0.730994	0.006323	8.64e-05	-1
ACBD4	0.73046	0.006335	8.74e-05	-1
Sep-06	0.759878	0.006363	8.81e-05	-1
AKAP1	0.727273	0.00642	8.91e-05	-1
MXD3	0.731529	0.006426	8.95e-05	-1
CNN2	0.750188	0.006485	9.09e-05	-1
SERPINF1	0.787402	0.006547	9.24e-05	-1
FLJ42957	0.74239	0.006548	9.21e-05	-1
EPB41L4B	0.965251	0.006613	9.42e-05	-1
TSGA14	0.714796	0.006628	9.38e-05	-1
MAPK8IP3	0.73692	0.006631	9.42e-05	-1
DNMT3A	0.884173	0.006787	9.7e-05	-1
LRRFIP1	0.927644	0.006911	9.91e-05	-1
SSPN	0.746826	0.007059	0.0001015	-1
ABLIM1	0.831255	0.007138	0.000103	-1
TRADD	0.8	0.007285	0.0001054	-1
ZNF761	0.749064	0.007301	0.000106	-1
GRN	0.73046	0.007384	0.0001078	-1
HSPA1B	0.848896	0.00779	0.0001141	-1
KIAA0125	0.731529	0.00779	0.0001159	-1
ILF3	0.777605	0.007803	0.0001157	-1
TMEM51	0.810373	0.007806	0.0001154	-1
LYPLA2	0.725163	0.007809	0.0001151	-1
CENPK	0.887311	0.007832	0.0001151	-1
SNRPN	0.770416	0.007846	0.0001178	-1
SIGLEC1	0.729927	0.007849	0.0001175	-1
ANK2	0.73046	0.007995	0.0001204	-1
CCDC88	0.747384	0.008023	0.0001212	-1
RANBP2	0.747384	0.008032	0.0001217	-1
HSPD1	0.762777	0.008157	0.0001239	-1
ZNF91	0.810373	0.008424	0.0001283	-1
LY6E	0.74184	0.008522	0.0001302	-1
C10orf58	0.740192	0.008635	0.0001323	-1
ASPSCR1	0.745712	0.008683	0.0001335	-1
C20orf149	0.791766	0.00869	0.000134	-1
LOC90624	0.765697	0.008821	0.0001364	-1
DCAL1	0.757576	0.008942	0.0001387	-1
ABCA7	0.773994	0.008972	0.0001395	-1
PLCXD1	0.743494	0.008975	0.00014	-1
LOC728554	0.76864	0.009076	0.000142	-1
STX5A	0.713267	0.009125	0.0001431	-1
SH3BP1	0.746826	0.009292	0.0001462	-1
MORC3	0.814332	0.009373	0.0001479	-1
NUMA1	0.807103	0.009514	0.0001505	-1
TRIM28	0.728863	0.009525	0.0001511	-1
MGAT4B	0.75188	0.009641	0.0001534	-1
DNASE1L3	0.740741	0.009662	0.0001542	-1
MIB2	0.724113	0.009674	0.0001548	-1
CDC2L1	0.810373	0.009733	0.0001562	-1
FBXO11	0.791139	0.009751	0.0001574	-1
SPIB	0.73692	0.009764	0.0001584	-1
DISC1	0.773395	0.009767	0.0001594	-1
TCL1A	0.887311	0.009771	0.0001572	-1
GOLGA8B	0.844595	0.009779	0.0001582	-1
XRCC3	0.750188	0.009791	0.0001593	-1
CTGLF5	0.803859	0.00989	0.0001618	-1
OR2AG1	0.759301	0.009921	0.0001628	-1
POLM	0.719942	0.009947	0.0001637	-1
PACAP	0.739098	0.01003	0.0001659	-1
FAM18B2	0.722543	0.01003	0.0001665	-1
FCER2	0.826446	0.01009	0.0001679	-1
ZNF654	0.821693	0.01026	0.000171	-1
TXK	0.748503	0.01052	0.0001764	-1
ANAPC2	0.762777	0.01052	0.0001768	-1
LEF1	0.73046	0.01052	0.0001774	-1
KLC2	0.736377	0.01058	0.0001789	-1
C21orf56	0.76864	0.01071	0.0001821	-1
DC2	0.76746	0.01073	0.0001818	-1
COL9A2	0.753012	0.01104	0.0001881	-1
ATP6V1G2	0.722543	0.01123	0.0001919	-1
CCDC135	0.75643	0.01124	0.0001926	-1
CCR7	0.731529	0.01126	0.0001934	-1
BACH1	0.761615	0.01126	0.0001938	-1
ZNF611	0.775795	0.01133	0.0001956	-1
RASSF5	0.817661	0.01139	0.0001971	-1
VPREB3	0.82713	0.01143	0.0001983	-1
ELMO1	0.819672	0.01167	0.000203	-1
CEACAM8	0.915751	0.01167	0.0002046	-1
TMEM24	0.765111	0.01169	0.0002045	-1
CLPTM1	0.739645	0.01181	0.0002076	-1
PLVAP	0.807103	0.01199	0.0002113	-1
RTN3	0.888889	0.01201	0.0002128	-1
SH2D3A	0.752445	0.01216	0.000216	-1
IFIT1	0.867303	0.01219	0.0002171	-1
LOC727922	0.773395	0.01245	0.0002228	-1
ACCN2	0.751315	0.01247	0.0002237	-1
RAI14	0.784314	0.01249	0.0002259	-1
C5orf16	0.755287	0.01252	0.0002257	-1
CUTL1	0.765111	0.01255	0.0002256	-1
SCGB3A1	0.976563	0.01272	0.000231	-1
NBPF3	0.78125	0.01273	0.0002307	-1
BTF3	0.758725	0.01273	0.0002329	-1
GRASP	0.796813	0.01274	0.0002326	-1
TOP1MT	0.783085	0.01275	0.0002322	-1
TMEPAI	0.797448	0.01276	0.0002341	-1
ZNF543	0.819001	0.01279	0.0002369	-1
CCDC100	0.839631	0.01281	0.0002368	-1
HSD17B11	0.814332	0.01282	0.000238	-1
OR1F1	0.854701	0.01282	0.0002364	-1
AP1G2	0.722543	0.01282	0.0002358	-1
DUT	0.739098	0.01284	0.0002391	-1
HAT1	0.800641	0.01302	0.0002429	-1
ATP5F1	0.776398	0.01317	0.0002463	-1
LOC96610	0.804505	0.01348	0.0002535	-1
GIMAP2	0.744602	0.01348	0.0002528	-1
LOC440993	0.874891	0.0137	0.0002588	-1
GUSBL1	0.793651	0.01373	0.0002587	-1
NR1D2	0.874891	0.01385	0.0002622	-1
DBR1	0.791139	0.01385	0.0002628	-1
COCH	0.814996	0.01385	0.0002634	-1
PPP2R3B	0.768049	0.01392	0.0002655	-1
PPIA	0.753012	0.01394	0.0002677	-1
CRELD1	0.740741	0.01394	0.0002671	-1
EHMT1	0.749625	0.01396	0.0002687	-1
LOC391157	0.764526	0.01404	0.0002708	-1
ENSA	0.774593	0.01442	0.0002789	-1
ZNF285A	0.75643	0.01447	0.0002805	-1
EFCAB4A	0.761035	0.01452	0.0002821	-1
PDLIM7	0.886525	0.01456	0.0002843	-1
IDH3G	0.776398	0.01459	0.0002842	-1
SRCAP	0.743494	0.01481	0.0002897	-1
RPS23	0.805153	0.01482	0.0002912	-1
ZNF385	0.788644	0.01484	0.000291	-1
ZNF415	0.772201	0.01499	0.0002952	-1
SLC25A20	0.902527	0.01516	0.0002994	-1
POLR2E	0.746826	0.01522	0.0003011	-1
HLTF	0.798085	0.01532	0.0003053	-1
NALP1	0.87184	0.01532	0.0003039	-1
OXNAD1	0.754148	0.01534	0.000305	-1
CCNDBP1	0.817661	0.01536	0.0003067	-1
IL11RA	0.801282	0.01536	0.0003074	-1
YWHAE	0.83682	0.01553	0.0003116	-1
CXYorf2	0.755287	0.01605	0.0003227	-1
RASL10A	0.749064	0.01613	0.000325	-1
PDE7A	0.88574	0.01622	0.0003276	-1
GRHL1	0.881834	0.01632	0.0003303	-1
CDK10	0.804505	0.01632	0.0003311	-1
TCF3	0.739098	0.01646	0.0003353	-1
C13orf18	0.765111	0.01653	0.0003375	-1
OTOF	0.918274	0.0167	0.0003417	-1
PIK3C2A	0.879507	0.01676	0.0003437	-1
SLC39A3	0.796178	0.01699	0.0003492	-1
FLJ46020	0.792393	0.01702	0.0003514	-1
CHURC1	0.806452	0.01705	0.0003512	-1
NELL2	0.76746	0.01733	0.0003625	-1
BACH2	0.740192	0.01734	0.000362	-1
TLR10	0.748503	0.01736	0.0003593	-1
MGC24039	0.787402	0.01737	0.0003609	-1
LOC727825	0.766284	0.01738	0.0003619	-1
FPRL1	0.841043	0.0174	0.0003608	-1
COL8A2	0.804505	0.01773	0.0003724	-1
TUBGCP6	0.768049	0.01827	0.0003847	-1
C16orf14	0.77101	0.01827	0.0003855	-1
TAF9	0.786782	0.01836	0.0003881	-1
THRAP5	0.769823	0.01849	0.0003917	-1
RBM26	0.777001	0.01866	0.0003961	-1
SNUPN	0.750188	0.01879	0.0003998	-1
DYRK2	0.761035	0.01941	0.0004156	-1
CHX10	0.825764	0.01942	0.000415	-1
NUBP2	0.750188	0.02014	0.0004332	-1
RALGPS2	0.770416	0.02018	0.0004348	-1
NARG1L	0.748503	0.02033	0.0004389	-1
ENTPD6	0.777001	0.02037	0.0004408	-1
CACNA1A	0.740192	0.02039	0.000442	-1
LOC643576	0.83682	0.02041	0.0004434	-1
PATZ1	0.744602	0.02048	0.0004487	-1
FBXO32	0.891266	0.0205	0.0004481	-1
TSKS	0.743494	0.02054	0.000448	-1
IL27RA	0.751315	0.02054	0.0004473	-1
MLF2	0.746826	0.02055	0.0004512	-1
PRRT1	0.745712	0.02057	0.0004524	-1
EPHA2	0.75188	0.02076	0.0004586	-1
SLC16A3	0.817661	0.02077	0.0004598	-1
USP4	0.854701	0.02078	0.000461	-1
RIOK1	0.789889	0.0208	0.0004585	-1
GHDC	0.734214	0.02092	0.0004649	-1
C1orf80	0.810373	0.02118	0.0004716	-1
CCL3	0.886525	0.02128	0.0004757	-1
AKAP7	0.807754	0.02129	0.0004751	-1
CBLL1	0.770416	0.0214	0.0004794	-1
AGPAT3	0.784314	0.02161	0.0004851	-1
TNFRSF13C	0.77101	0.02163	0.0004865	-1
PLCB2	0.77101	0.02176	0.0004904	-1
ELOVL4	0.829876	0.02187	0.000495	-1
TOM1	0.798722	0.02188	0.000494	-1
MAD1L1	0.761615	0.02215	0.0005022	-1
ZNF414	0.77101	0.02237	0.0005082	-1
ZSWIM4	0.792393	0.02238	0.0005095	-1
MKNK2	0.762195	0.02255	0.0005144	-1
RNF125	0.968054	0.02265	0.0005196	-1
FAF1	0.839631	0.02267	0.0005192	-1
HLA-DRB4	0.851064	0.0227	0.0005189	-1
CD19	0.810373	0.02284	0.0005261	-1
ZNF124	0.83682	0.02288	0.0005259	-1
ELMO2	0.803213	0.0231	0.0005342	-1
TAF6	0.765697	0.02314	0.000534	-1
LPHN1	0.744048	0.02317	0.0005421	-1
INPP5E	0.8	0.02317	0.00054	-1
PIM3	0.77101	0.02318	0.0005412	-1
CHTF18	0.796178	0.02319	0.0005394	-1
TADA3L	0.759878	0.0232	0.0005385	-1
PCYOX1L	0.75188	0.0232	0.0005376	-1
C3orf63	0.777001	0.02357	0.0005524	-1
DIS3	0.790514	0.02394	0.0005623	-1
ARS2	0.745712	0.02409	0.0005678	-1
NAPE-PLD	0.805153	0.02412	0.0005676	-1
LOC729021	0.786782	0.02419	0.0005714	-1
MGC24975	0.799361	0.02431	0.0005753	-1
NRGN	0.851064	0.02456	0.0005824	-1
ANPEP	0.884173	0.02458	0.000585	-1
PDPR	0.803859	0.02458	0.000584	-1
BAIAP2	0.808407	0.02473	0.0005898	-1
SIN3B	0.774593	0.02499	0.0005993	-1
SNF1LK	0.895255	0.02499	0.0005981	-1
2003-03-01	0.820345	0.02501	0.0006076	-1
KCNAB2	0.765697	0.02503	0.0006058	-1
STAB1	0.841043	0.02504	0.0006038	-1
LOC728734	0.772201	0.02506	0.0006032	-1
ZNF502	0.838223	0.02507	0.0006057	-1
LOC348262	0.75188	0.02508	0.0006026	-1
SNX5	0.800641	0.02513	0.0006118	-1
TNRC6C	0.776398	0.02546	0.0006208	-1
TFAP4	0.774593	0.02548	0.0006248	-1
RBM4	0.844595	0.02551	0.0006243	-1
NOSIP	0.759878	0.02553	0.0006239	-1
BCAS2	0.814332	0.02557	0.0006283	-1
EDG1	0.788022	0.02561	0.0006304	-1
ZSCAN12	0.772201	0.02603	0.0006477	-1
MGC33556	0.762777	0.02604	0.0006422	-1
BRI3BP	0.820345	0.02605	0.0006457	-1
E2F5	0.75643	0.02606	0.0006449	-1
COL4A3	0.782473	0.02609	0.0006444	-1
ZNF500	0.751315	0.02611	0.0006509	-1
AGMAT	0.829876	0.02612	0.0006524	-1
PNPLA2	0.779423	0.02642	0.0006622	-1
GOLGA8A	0.819001	0.02642	0.000661	-1
SSSCA1	0.817661	0.02648	0.0006672	-1
SPON1	0.786164	0.02652	0.0006672	-1
PPP1R15B	0.860585	0.02652	0.0006707	-1
SCAND2	0.825083	0.02654	0.0006699	-1
CLUAP1	0.777001	0.02655	0.0006665	-1
C2orf15	0.775795	0.02657	0.0006742	-1
WNK1	0.816327	0.02659	0.000676	-1
PYGO2	0.749625	0.0272	0.0006926	-1
PPAP2A	0.780031	0.02732	0.000697	-1
CORO7	0.749064	0.02751	0.0007033	-1
MAD2L1BP	0.897666	0.02783	0.0007126	-1
RAB40C	0.777605	0.02786	0.0007184	-1
SAMD1	0.813008	0.02787	0.0007173	-1
DPAGT1	0.78125	0.02789	0.0007165	-1
FAM55C	0.893655	0.02811	0.0007261	-1
HIATL2	0.841043	0.02823	0.0007306	-1
SR-A1	0.783085	0.0283	0.0007334	-1
CSNK1G2	0.75358	0.0283	0.0007348	-1
GGH	0.795545	0.02861	0.0007441	-1
PAEP	0.873362	0.02861	0.0007466	-1
HMBS	0.791766	0.02865	0.0007465	-1
TMEM177	0.755287	0.02947	0.0007705	-1
RLTPR	0.771605	0.02949	0.0007722	-1
SIGIRR	0.81103	0.02963	0.0007773	-1
KLHL14	0.793021	0.02998	0.000788	-1
HAPLN3	0.788644	0.03027	0.0007969	-1
ZNF574	0.783699	0.03044	0.0008028	-1
BPTF	0.793651	0.03084	0.0008161	-1
RWDD3	0.76864	0.03089	0.000816	-1
DOK2	0.853242	0.03099	0.0008215	-1
CDK8	0.811688	0.03107	0.0008262	-1
CXorf34	0.940734	0.03118	0.0008307	-1
C9orf77	0.831947	0.03121	0.0008329	-1
HSF1	0.820345	0.03132	0.0008372	-1
GPR44	0.843882	0.0316	0.0008489	-1
CD151	0.84246	0.03163	0.0008484	-1
NUCB2	0.769231	0.03188	0.0008623	-1
APBA2	0.775795	0.0319	0.0008658	-1
VSTM1	0.917431	0.03192	0.0008619	-1
AGRIN	0.770416	0.03196	0.0008615	-1
NDUFB3	0.782473	0.03199	0.0008609	-1
TCIRG1	0.911577	0.03263	0.0008884	-1
FGF18	0.904159	0.03268	0.0008926	-1
SF3A2	0.76746	0.03268	0.0008913	-1
EPHX2	0.773395	0.03278	0.0008998	-1
WNT10B	0.829187	0.0328	0.000899	-1
CROP	0.766284	0.03307	0.0009108	-1
DMWD	0.784314	0.03309	0.0009129	-1
MAP2K2	0.757002	0.03311	0.0009104	-1
CUTL2	0.772798	0.03338	0.0009225	-1
BRD4	0.857633	0.03365	0.0009315	-1
MUC20	0.925069	0.03373	0.000935	-1
PSMA1	0.809717	0.03397	0.0009433	-1
INTU	0.757002	0.03422	0.0009517	-1
RAB18	0.843882	0.03448	0.0009606	-1
MAGED1	0.779423	0.03452	0.0009632	-1
FBXO4	0.82713	0.03456	0.000966	-1
MAT2B	0.852515	0.0351	0.0009856	-1
SC4MOL	0.856898	0.03517	0.0009846	-1
TES	0.788644	0.03523	0.0009958	-1
C1orf159	0.783085	0.03527	0.0009938	-1
FYN	0.843882	0.03528	0.0009956	-1
FAM63A	0.932836	0.03553	0.001007	-1
MAP1S	0.749064	0.03582	0.001017	-1
PRO1853	0.77821	0.03588	0.001021	-1
LDB2	0.85034	0.03595	0.001024	-1
CKS2	0.881057	0.03633	0.001037	-1
MCL1	0.824402	0.03666	0.001048	-1
CABYR	0.892061	0.03671	0.001053	-1
RBMS1	0.859845	0.03672	0.001051	-1
SLC2A5	0.877963	0.03674	0.001055	-1
FBS1	0.787402	0.03683	0.001059	-1
LMOD3	0.933707	0.03698	0.001065	-1
MAS1	0.838926	0.03715	0.001073	-1
DGKA	0.766284	0.03718	0.001073	-1
OR52D1	0.825083	0.03732	0.00108	-1
HTRA2	0.782473	0.03743	0.001087	-1
ALDH4A1	0.761035	0.03748	0.001086	-1
SPON2	0.77101	0.03758	0.001093	-1
SCMH1	0.769231	0.03832	0.001121	-1
RAB39B	0.77101	0.03837	0.001121	-1
UAP1L1	0.848176	0.03839	0.00112	-1
SNCB	0.854701	0.03856	0.00113	-1
FBXO38	0.771605	0.03867	0.00114	-1
ZNF473	0.787402	0.03868	0.001139	-1
SMN1	0.829876	0.03869	0.001135	-1
VAMP4	0.819001	0.03878	0.001147	-1
DTX3	0.789889	0.03883	0.001147	-1
EIF1AX	0.831255	0.03949	0.00117	-1
IHPK2	0.826446	0.03962	0.001175	-1
HIP1R	0.802568	0.03966	0.001178	-1
MAN2C1	0.803859	0.03973	0.001182	-1
HYOU1	0.761035	0.04025	0.001203	-1
CCR9	0.765111	0.04025	0.001207	-1
MMP28	0.755287	0.04028	0.001206	-1
BCOR	0.876424	0.0403	0.001201	-1
BLNK	0.77821	0.04048	0.001215	-1
ITIH4	0.841043	0.04097	0.001232	-1
EDAR	0.787402	0.04141	0.001247	-1
CSTF3	0.835422	0.04141	0.001251	-1
RHBDD3	0.789889	0.04143	0.001249	-1
PLXNC1	0.796813	0.04149	0.001255	-1
C4orf30	0.894454	0.04167	0.001264	-1
HIST1H4H	0.960615	0.04167	0.001262	-1
NAPSA	0.824402	0.04193	0.001274	-1
CCNT2	0.827815	0.04231	0.001291	-1
C6orf170	0.758725	0.04233	0.00129	-1
VPS16	0.87108	0.04272	0.001306	-1
PHC2	0.825083	0.0429	0.001315	-1
CAPN12	0.832639	0.04295	0.001322	-1
ADNP	0.853242	0.04296	0.001315	-1
PTK2B	0.796813	0.04298	0.001331	-1
ISYNA1	0.794281	0.043	0.00133	-1
CTBP1	0.834028	0.04301	0.00132	-1
C6orf27	0.874126	0.04306	0.00133	-1
ZNF579	0.825764	0.04332	0.001343	-1
ITFG3	0.761035	0.04339	0.001348	-1
FLNA	0.789266	0.04373	0.00136	-1
MBTPS1	0.823045	0.04388	0.001369	-1
GPSN2	0.765111	0.04394	0.001369	-1
METTL5	0.772201	0.04442	0.00139	-1
LOC155060	0.831947	0.04444	0.001392	-1
SLC16A10	0.783699	0.04444	0.001388	-1
PFN1	0.757576	0.04509	0.001415	-1
ZNF154	0.772201	0.04576	0.00144	-1
ATP13A2	0.766871	0.04598	0.001451	-1
FAM43A	0.90009	0.04599	0.001453	-1
RABL2B	0.83612	0.04602	0.00145	-1
RANBP1	0.773994	0.04639	0.001468	-1
MICAL2	0.791766	0.0476	0.001508	-1
KCNN3	0.807754	0.04762	0.001511	-1
AP2A1	0.784314	0.04783	0.00152	-1
HLA-G	0.853971	0.04817	0.001537	-1
RABEP2	0.76864	0.04819	0.001534	-1
CDKN1C	0.883392	0.04824	0.001542	-1
GDI1	0.792393	0.04838	0.001549	-1
NACA	0.786782	0.04869	0.001563	-1
GGTLA4	0.818331	0.04875	0.001567	-1
HMP19	0.868056	0.04886	0.001573	-1
SETD1A	0.77821	0.04903	0.001582	-1
C16orf30	0.777605	0.04908	0.001586	-1
ZFPM1	0.779423	0.04917	0.001591	-1
PHF17	0.800641	0.04919	0.001596	-1
BOK	0.771605	0.04925	0.001596	-1
OR10G8	0.92081	0.04942	0.001606	-1
CLIC3	0.83612	0.04993	0.001625	-1
