# Supplementary material for: In Silico Analysis Highlights Potential Predictive Indicators Associated with Secondary Progressive Multiple Sclerosis
Source: Int J Mol Sci. 2024 Mar 16;25(6):3374. doi: 10.3390/ijms25063374 (PMC10970138; doi:10.3390/ijms25063374)
Supplement: Supplementary file 1 [file ijms-25-03374-s001.zip › Supplementary Table S2.xlsx]

## Sheet: Supplementary Table S2
Supplementary Table S2. Number of DEGs up and down-regulated for each dataset of SPMS.
Dataset	Tissue	N. of up-regulated DEGs	N. of down-regulated DEGs	N. of total DEGs
GSE126802	Brain	101	2	103
GSE131282	Brain	3727	3958	7685
GSE17048	Blood	694	798	1492
E-MTAB-4890	Blood	1028	980	2008
E-MTAB-5151	Blood	2822	1601	4423
E-MTAB-11415	Blood	748	652	1400
In the first column are reported the datasets used for DEA. Second column includes the type of tissue analyzed in the dataset. In the second, third and fourth column are reported respectively the number of up-regulated, down-regulated and total of DEGs resulted from DEA of the da-tasets. All the DEGs reported resulted from the comparison of SPMS vs HC.

## Sheet: Supplementary Table S2 Detailed
Gene	GSE126802			GSE131282			GSE17048			E-MTAB-4890			E-MTAB-5151			E-MTAB-11415
	logFC	q.Value	Direction	logFC	q.Value	Direction	logFC	q.Value	Direction	logFC	q.Value	Direction	logFC	q.Value	Direction	logFC	q.Value	Direction
AAK1				0.356236	0.04899	1				0.310254	7.42e-07	1				0.440655	2.33e-05	1
ABCA1				-0.41684	0.01923	-1	0.237354	0.0001095	1	0.379883	2.77e-05	1	-0.90458	3.07e-06	-1	0.478145	0.003597	1
ABCA2				0.715723	0.0003041	1				-0.355016	8.13e-05	-1				-0.468844	0.001998	-1
ABCB8				0.775466	9.17e-05	1				-0.233888	0.03175	-1				-0.627607	0.0001157	-1
ABCD1				0.406407	0.02065	1				-0.378512	0.0001686	-1				-0.591679	0.0002792	-1
ABLIM1				0.500014	0.00582	1				-0.364012	8.2e-05	-1				-0.266637	0.007138	-1
ABLIM3				-0.543991	0.003364	-1				0.236843	0.0008171	1				0.363271	0.001779	1
ACAP3				0.518494	0.004274	1				-0.371838	0.0002614	-1				-0.893751	1.49e-07	-1
ACER3				-0.569491	0.001469	-1				0.191986	0.03444	1	0.847881	7.82e-05	1
ACSL5				-0.421156	0.009097	-1				0.268643	0.00822	1	0.824699	0.0002011	1
ADIPOR1				-0.977463	1.46e-06	-1	-0.217851	0.002506	-1				-0.660837	0.0007304	-1
AEBP1				-0.803227	1.39e-05	-1				-0.37629	0.0001455	-1				-0.721591	1.4e-05	-1
AFAP1				0.632853	0.000799	1				0.298318	0.001255	1				0.489443	0.001961	1
AFAP1L2				-0.395063	0.02523	-1				0.207228	0.01345	1				0.309538	0.03014	1
AGPAT2				0.538052	0.0003748	1				-0.21661	0.04369	-1				-0.476122	0.002681	-1
AHNAK				-0.420078	0.01674	-1				0.277009	0.002881	1				0.482372	0.003753	1
AK5				-0.623867	0.001225	-1				-0.206643	0.04428	-1				-0.538041	0.0004472	-1
AKAP17A				-0.849599	1.06e-05	-1				-0.266637	0.003593	-1	-0.646163	0.0006438	-1
AKR1C3				-0.436162	0.01031	-1	0.320486	3.61e-05	1				0.856215	2.33e-05	1
ALAS2				0.196773	0.0004042	1	-0.0854247	0.001414	-1				-0.387363	0.004094	-1
ALKBH3				0.539939	0.003142	1				0.202074	0.039	1	0.511485	0.01533	1
ALYREF				0.449099	0.01246	1				-0.24123	0.001142	-1	-0.393965	0.04004	-1	-0.499782	9.86e-05	-1
AMY2B				-0.929791	3.21e-06	-1				-0.23634	0.001392	-1				-0.499782	1.76e-05	-1
ANG				0.342269	0.02606	1				0.180822	0.006019	1				0.27666	0.01959	1
ANPEP				0.571322	0.003396	1	-0.0565835	0.04456	-1	-0.189034	0.0003237	-1	-0.546956	0.001237	-1	-0.177599	0.02458	-1
ANXA3				-0.711935	0.0001426	-1	0.103767	0.04503	1				0.560856	0.0005099	1	0.328435	0.002911	1
AP1S1				-0.436162	0.01608	-1				0.213738	0.03605	1				0.451267	0.004869	1
ARHGAP18				-0.863938	1.26e-05	-1				0.151042	0.04805	1	0.83367	0.0001025	1	0.319586	0.01394	1
ARHGAP21				-0.45628	0.008675	-1				0.39973	2.01e-05	1				0.425656	0.01457	1
ARHGAP30				0.756575	0.0001072	1	-0.253384	0.005272	-1	-0.316146	9.22e-05	-1	0.959318	1.21e-05	1	-0.474047	0.0003797	-1
ARHGEF1				0.636212	0.0006344	1				-0.586885	3.01e-09	-1				-0.641546	2.83e-05	-1
ASAP2				-0.478195	0.008794	-1				0.282263	0.000869	1	0.307394	0.03756	1	0.438307	0.00302	1
ASGR1				-0.738119	7.35e-05	-1				0.46037	2.23e-06	1	0.387789	0.04978	1	0.515192	0.003301	1
ASIC5				-0.669027	0.0003654	-1				-0.0690147	0.03617	-1				-0.197865	0.0003512	-1
ATF4				-0.368489	0.02157	-1				-0.129613	0.03087	-1	-0.564622	0.003209	-1
ATP5MK				0.863546	6.77e-06	1				-0.16092	0.003735	-1				-0.437228	7.76e-06	-1
ATXN3				-0.784085	3.92e-05	-1							0.782149	0.0001118	1	0.387034	0.001464	1
BCAS2				-0.97306	2.33e-06	-1							-0.896853	3.48e-06	-1	-0.296311	0.02557	-1
BCL3				-0.496718	0.00367	-1	-0.215368	0.004998	-1	-0.286881	0.002363	-1	-0.993493	1.2e-06	-1	-0.551885	0.0002086	-1
BCL7B				0.345381	0.04778	1				-0.244887	0.01763	-1	-0.637842	0.0004912	-1
BCOR				0.505943	0.004027	1				-0.0962619	0.03894	-1	-1.22219	2.54e-08	-1	-0.190299	0.0403	-1
BEND2				0.41754	0.0229	1				0.299915	0.000143	1	0.289122	0.01684	1	0.428954	0.001592	1
BEX3				0.469929	0.00641	1				0.207061	0.006792	1				0.303116	0.01595	1
BID				0.379507	0.03417	1	-0.284514	0.002491	-1				-0.515006	0.006196	-1
BMP2K				-0.389567	0.02735	-1							0.89325	4.26e-05	1	0.345748	0.006852	1
BOK				0.401444	0.01759	1	-0.0086303	0.04516	-1							-0.374066	0.04925	-1
BPGM				-0.652601	0.0005353	-1	-0.130931	0.007782	-1				-0.470927	0.009042	-1
BPTF				0.364571	0.04994	1				-0.235114	0.00557	-1				-0.333424	0.03084	-1
BRWD1				-0.648005	0.0004143	-1				0.223138	0.001656	1				0.452254	0.0005744	1
BTF3				0.574326	0.001277	1				-0.324235	0.0001864	-1				-0.39835	0.01273	-1
C15ORF39				0.373514	0.03422	1	-0.227741	0.01198	-1				-0.702214	0.0002587	-1
C17ORF75				-0.50284	0.004065	-1				0.242977	0.004401	1				0.526161	3.58e-05	1
C19ORF12				0.769797	9.43e-05	1				0.264998	0.004601	1	0.619049	0.002716	1	0.0706635	0.04905	1
C1ORF159				0.58208	0.001516	1				-0.225275	0.02445	-1				-0.352759	0.03527	-1
C1ORF21				-0.436162	0.01297	-1				0.260843	0.003038	1	0.491064	0.02337	1	0.518908	0.0005535	1
C1ORF43				-0.587845	0.001495	-1				-0.257011	0.001797	-1	-0.436162	0.02979	-1	-0.45628	0.0004161	-1
C5AR1				0.482372	0.005263	1	-0.147958	0.03552	-1				-0.745883	0.0001406	-1
C9ORF72				-0.721591	6.91e-05	-1				0.177229	0.04334	1				0.354206	0.02802	1
CACHD1				-0.720716	0.0001093	-1				-0.22404	0.04226	-1				-0.611645	0.0002651	-1
CACNA2D2				0.42876	0.0141	1				0.22095	0.01488	1				0.366057	0.02951	1
CALD1				-0.630405	0.0004093	-1				0.223475	0.003638	1	0.344099	0.001222	1	0.447525	0.0006413	1
CAMP				0.400492	0.02301	1	0.00969858	0.002303	1	0.0975791	2.58e-05	1				0.273343	5.31e-06	1
CAPZA1				0.494719	0.006791	1	-0.0426443	0.02439	-1	-0.111031	0.01908	-1
CAST				-0.521051	0.004539	-1				0.306323	6.89e-05	1				0.726424	7.97e-08	1
CAVIN2				-0.750178	8.75e-05	-1	0.0784113	0.02444	1	0.297254	4.99e-05	1				0.31276	0.0223	1
CBX3				0.537634	0.002206	1				0.213571	0.002737	1				0.314374	0.02852	1
CBX4				0.465739	0.006069	1				-0.235114	0.01438	-1	-0.543001	0.00386	-1
CCAR1				-0.956057	2e-06	-1				0.139871	0.005934	1	0.477342	0.02726	1
CCDC88B				0.379507	0.03225	1				-0.332278	0.0002276	-1				-0.420078	0.008023	-1
CCDC9B				-0.678973	3.9e-06	-1				0.310254	0.000777	1				0.411387	0.01727	1
CCNC				0.653355	0.0004329	1				-0.24245	0.003699	-1				-0.444667	0.0006737	-1
CCNL1				-0.480265	0.007703	-1				-0.149259	0.008938	-1	-1.55925	6.82e-12	-1
CD163	0.818579	0.01037	1	0.212066	0.002487	1				0.157142	0.01074	1	0.521183	0.01033	1
CD24				-0.397255	0.003133	-1	0.0793256	0.04138	1				1.02268	3.38e-06	1
CD248				0.467334	0.01193	1	-0.316146	0.0001217	-1	-0.466758	3.79e-07	-1				-0.892974	1.48e-08	-1
CD36				0.495125	0.001638	1				0.250509	0.0005956	1	1.7336	2e-11	1
CD37				0.586189	0.002247	1				-0.496718	9.67e-07	-1				-0.512985	0.00511	-1
CD46				-0.625738	0.0005873	-1	-0.134878	0.03472	-1				-0.621056	0.0009551	-1
CD74				0.420434	0.006331	1				-0.536053	1.58e-07	-1	-0.620117	0.001106	-1	-0.657183	2.75e-05	-1
CD8A				0.575185	0.0007033	1	-0.250962	0.0001248	-1	-0.334568	1.07e-05	-1				-0.503858	6.18e-05	-1
CDC14B				-0.358396	0.04561	-1							0.624822	0.0004572	1	0.259116	0.02854	1
CDK11B				-0.390668	0.0264	-1				-0.227741	0.001866	-1				-0.303342	0.009733	-1
CDK5RAP2				0.344465	0.03893	1				0.599243	1.54e-08	1				0.684318	6.43e-05	1
CDK5RAP3				-0.467801	0.007868	-1				-0.361768	2.39e-07	-1				-0.41792	9.56e-05	-1
CEP120				-0.648005	0.0004764	-1				-0.151859	0.04944	-1	-0.512985	0.006468	-1	-0.252173	0.01281	-1
CEP85L				-0.982583	1.33e-06	-1				0.0774977	0.01047	1	0.448312	0.04035	1	0.228875	0.008117	1
CEPT1				0.491673	0.006511	1							0.873556	5.68e-05	1	0.194955	0.03937	1
CERS6				-0.526069	0.003387	-1				-0.237564	0.01834	-1	-0.377401	0.04674	-1
CFD	1.09357	0.001039	1				-0.387363	7.14e-07	-1	-0.166073	0.001914	-1
CGAS				0.520562	0.003511	1				0.155855	0.01166	1				0.24554	0.01521	1
CHD9				-0.494672	0.004722	-1	0.220278	0.01145	1				1.15361	4.27e-07	1
CHMP5				-0.366252	0.04418	-1	0.294066	0.0002612	1				0.891375	5.98e-05	1
CHSY1				-0.481299	0.00632	-1	-0.285698	0.0003909	-1				-0.434028	0.03029	-1
CHTF18				0.441634	0.01248	1				-0.204141	0.01423	-1				-0.328836	0.02319	-1
CHURC1				-1.07382	3.57e-07	-1	-0.0342157	0.004674	-1	-0.327687	2.19e-05	-1	0.554273	0.007644	1	-0.31034	0.01705	-1
CITED2				-0.378512	0.03376	-1				-0.252173	0.003819	-1	-0.826193	9.11e-05	-1
CLEC4F				0.524915	0.00217	1				-0.0551957	0.02273	-1				-0.167358	0.0002553	-1
CLK1				-0.822934	2.12e-05	-1				-0.333424	9.47e-05	-1	-1.1375	3.3e-08	-1	-0.478195	0.0003308	-1
CLU				0.424107	0.01999	1							0.440655	0.002836	1	0.319766	0.02457	1
CNN2				0.589659	0.0009456	1	-0.180148	0.02675	-1	-0.217851	0.02399	-1				-0.414677	0.006485	-1
COL18A1				0.383642	0.03398	1				0.120137	0.02036	1				0.179188	0.009212	1
COL4A3				1.12879	2.75e-07	1							-0.648005	0.0001456	-1	-0.353888	0.02609	-1
COL6A2				0.436354	0.03135	1				-0.266637	0.00203	-1				-0.494672	0.0002186	-1
CORO7				0.50226	0.004166	1				-0.38405	0.0001251	-1				-0.41684	0.02751	-1
COX15				0.513131	0.003737	1				0.162137	0.04416	1	0.893786	4.22e-05	1
CPNE5				0.624599	0.0005154	1				-0.221568	0.01763	-1				-0.498761	0.0003531	-1
CPNE8				-1.06764	5.78e-07	-1				0.192645	0.03241	1	0.679458	0.001473	1
CPT1A				-0.711054	0.0001393	-1				0.230905	0.01758	1				0.388355	0.02326	1
CREB5				-0.554834	0.002375	-1				0.200415	0.005222	1	1.04961	2.76e-06	1
CREBZF				-0.441483	0.0114	-1	0.214575	0.0276	1				1.2643	2.82e-08	1
CRTC1				0.474933	0.007272	1				-0.348232	0.0008151	-1				-0.737254	1.17e-05	-1
CRYZ				-0.598365	0.0007481	-1	0.211398	0.02081	1				1.44379	1.07e-09	1
CST7				0.513749	0.005141	1	0.121079	0.03474	1	0.136537	0.004534	1
CTLA4				0.505533	0.003171	1				0.319226	0.0001824	1				0.375384	0.01985	1
CTSL				0.537424	0.002733	1				0.396688	6.91e-06	1				0.558517	0.0002053	1
CXCL5				-0.488515	0.005925	-1				0.290709	0.0001768	1	0.737928	3.98e-06	1	0.567041	1.34e-05	1
CXCL8				0.691989	0.0001122	1	0.078259	0.02738	1	0.0788684	0.004221	1	-5.70183	1.24e-41	-1	0.227692	0.0003855	1
CXCR2				0.400492	0.02788	1	-0.375178	2.1e-06	-1	0.177229	0.01029	1	0.716908	0.0001025	1	0.289122	0.02808	1
CXCR4	0.660635	0.01427	1	0.258425	0.02567	1				-0.504875	7.74e-11	-1	-1.18396	1.42e-08	-1	-0.578214	5.6e-07	-1
CYBA				0.334243	0.01368	1	-0.22033	0.0172	-1	-0.261832	0.008219	-1
CYRIB				-1.02574	9.45e-07	-1	-0.14274	0.0414	-1	-0.230203	0.003521	-1
DAB2				-0.458382	0.008836	-1				0.336974	2.69e-05	1	0.881242	4.43e-05	1	0.424107	0.001983	1
DACT1				0.632853	0.0008985	1				0.107337	0.01744	1	0.571965	0.008295	1	0.172181	0.003023	1
DAP				0.497568	0.003257	1				0.366429	0.0001272	1				0.385526	0.04438	1
DCAF16				-0.439357	0.01261	-1				-0.111031	0.004889	-1				-0.16092	0.04167	-1
DCUN1D1				-0.675364	0.0002009	-1				-0.121679	0.01444	-1	-0.522056	0.007868	-1
DDX21				-0.367371	0.04038	-1				-0.195348	0.02007	-1	-0.590722	0.001497	-1
DENND1B				-0.738119	7.61e-05	-1				0.317786	0.001077	1	0.542038	0.009638	1	0.421979	0.01967	1
DHX9				-0.407081	0.02925	-1				-0.163499	0.01347	-1	-0.892197	3.05e-06	-1	-0.269033	0.005731	-1
DNAAF11				-0.757023	7.99e-05	-1				0.259979	0.005007	1				0.518701	0.0009262	1
DNAJB14				-0.624803	0.0006159	-1				-0.233888	0.003929	-1				-0.328836	0.006315	-1
DNHD1				0.482372	0.004597	1				-0.291604	0.00237	-1				-0.483364	0.003253	-1
DNM3				-0.650765	0.0005749	-1				0.130839	0.01119	1	0.396688	0.02867	1
DPY30				0.553003	0.001954	1	0.305432	0.0004034	1				0.981936	9.52e-06	1
DPYSL4				-0.815575	2.1e-05	-1				0.231413	0.0004027	1				0.361973	1.2e-05	1
DRD3				0.400301	0.007207	1				0.181313	0.01596	1				0.330973	0.004486	1
DYRK2				0.425075	0.01481	1				-0.35727	7.97e-05	-1				-0.393965	0.01941	-1
EEIG1				-0.439357	0.01311	-1				-0.27023	0.004652	-1	-0.540027	0.004185	-1
EI24				-0.583038	0.001911	-1				-0.353888	0.0003355	-1				-0.50284	0.00383	-1
EIF2AK1				-0.748461	7.93e-05	-1				0.428178	9.71e-06	1				0.479955	0.006194	1
ELOVL5				-0.427606	0.0193	-1	-0.182692	0.02331	-1	-0.237564	0.004977	-1
ENC1				-0.62293	0.001314	-1	-0.1137	0.03204	-1				-0.863146	1.42e-05	-1
ENSA				-0.716332	0.000153	-1				-0.266637	0.002562	-1				-0.368489	0.01442	-1
EPHX2				-0.479231	0.00777	-1				-0.267835	0.001774	-1				-0.370722	0.03278	-1
ERAP2				0.37707	0.009085	1	-0.145351	2.6e-05	-1	-0.178874	5.04e-06	-1				-0.212881	0.001368	-1
EYA3				0.413115	0.01832	1							0.628831	0.002889	1	0.226172	0.02241	1
FAM110A				0.543089	0.003928	1				0.363085	0.0001239	1				0.393463	0.03558	1
FAM13A				0.340441	0.03873	1				0.398208	3.44e-05	1	1.0613	2.66e-06	1	0.626157	0.0001057	1
FAM43A				-0.349365	0.02892	-1				-0.0935602	0.00913	-1	-0.45628	0.02123	-1	-0.151859	0.04599	-1
FAM76A				-0.824564	3.21e-05	-1				0.279284	0.005516	1				0.440068	0.01595	1
FARSB				-0.437228	0.009452	-1				0.157464	0.008371	1	0.781157	0.0002598	1
FBLN2				0.334789	0.04002	1				-0.342555	0.0005395	-1				-0.794104	1.42e-06	-1
FBXO7				0.522012	0.003453	1	-0.24245	0.0006272	-1				-0.558757	0.003342	-1
FCGR1BP				0.52824	0.0005433	1	0.154088	0.001744	1				0.858567	9.5e-05	1
FHL2				0.777443	0.0001014	1				0.16246	0.01597	1				0.292829	0.0141	1
FLCN				0.478145	0.008419	1				0.28086	0.0003403	1	0.661547	0.001625	1	0.438698	0.0005646	1
FLJ45337				0.682001	0.0002553	1				0.258598	0.001071	1				0.298318	0.04436	1
FSTL1				-0.477159	0.006655	-1				0.331881	6.16e-06	1				0.533451	4.17e-05	1
GABPB2				-0.517024	0.003898	-1				0.177392	0.008264	1	0.462555	0.03472	1	0.340989	0.00199	1
GASK1B				-0.478195	0.007295	-1				0.298318	0.0001389	1	1.82011	1.3e-12	1	0.406216	0.009354	1
GBP5				0.332789	0.04132	1				0.164399	0.02788	1	0.522219	0.01044	1
GFOD2				-0.434028	0.01453	-1				0.304541	0.00203	1				0.550043	0.001574	1
GFRA2				-0.327687	0.02968	-1				0.205896	0.01847	1				0.3893	0.01041	1
GNG11				-0.557778	0.001391	-1	0.197269	0.0006394	1	0.331155	5.48e-05	1	0.309359	0.0115	1	0.343916	0.02599	1
GNL3L				-0.404903	0.02157	-1				0.235144	0.001156	1	0.369408	0.04334	1
GON7				-0.730314	0.0001419	-1	0.235994	0.01145	1				0.73889	0.0004632	1
GPAA1				0.632629	0.000601	1				-0.395063	5.53e-05	-1				-0.511974	0.001915	-1
GPR18				0.488228	0.006285	1				-0.27858	0.0002896	-1	-0.377401	0.03606	-1	-0.385155	0.005788	-1
GPR34				-0.382944	0.005514	-1							0.554273	0.006862	1	0.246909	0.03601	1
GRM2				-0.452068	0.006684	-1				0.265171	0.007681	1				0.417348	0.006253	1
GTF2H5				-0.364012	0.04152	-1	0.309002	0.0003748	1				1.28947	2.87e-08	1
GUSBP2				-0.663572	0.0002823	-1				-0.293959	6.5e-05	-1				-0.333424	0.01373	-1
GYPC				0.295659	0.04703	1	-0.140124	0.008949	-1	-0.289244	0.0008828	-1	-0.471968	0.01984	-1
H2AC20				-0.835116	1.9e-05	-1				0.403924	3.5e-05	1				0.471129	0.008527	1
H2BC11				0.597714	0.001076	1				0.174459	0.002161	1				0.23226	0.04025	1
H2BC21				-0.590722	0.0003485	-1	-0.297485	0.0002269	-1	-0.0565835	0.003583	-1	-0.207893	0.007717	-1
H4C8				0.415615	0.006653	1	-0.340277	0.0001589	-1	-0.0100637	0.008679	-1	0.310432	0.01654	1	-0.0579701	0.04167	-1
HAPLN3				0.447721	0.01103	1				-0.207893	0.01405	-1				-0.342555	0.03027	-1
HBS1L				-0.557778	0.001421	-1				0.125478	0.03281	1	0.452254	0.03492	1	0.377819	0.0002387	1
HDC				0.83779	2.12e-05	1	0.195781	3.86e-05	1	0.482775	1.02e-08	1	-0.425459	0.03645	-1	0.624599	1.31e-06	1
HECA				-0.978196	4.71e-06	-1	-0.149259	0.03251	-1				-0.603122	0.001411	-1
HELB				0.618606	0.0007105	1				0.139713	0.01118	1				0.268469	0.008456	1
HERC5				-0.74932	7.91e-05	-1	0.111072	0.0005883	1	0.120451	0.01743	1
HLA-C				-0.411426	7.9e-05	-1	-0.0867838	4.69e-05	-1	-0.291604	5.38e-06	-1				-0.380729	0.0002894	-1
HLA-DRB1				1.51457	3.85e-12	1	2.02974	1.95e-26	1	0.27282	3.07e-09	1				0.292299	7.48e-09	1
HLA-DRB4				0.264131	0.0004141	1	-0.395063	2.3e-07	-1	-0.228973	3.94e-05	-1	0.451465	4.27e-05	1	-0.232661	0.0227	-1
HLA-DRB5	0.372767	0.03943	1	1.43168	3.61e-11	1	2.45641	1.63e-27	1	0.717382	4.53e-09	1				0.814514	3.48e-08	1
HLA-F				1.05679	1.11e-06	1				-0.1137	0.0443	-1	-0.409255	0.03211	-1
HLA-G				-0.337996	0.03005	-1	-0.219091	0.003377	-1	-0.16221	0.01555	-1				-0.227741	0.04817	-1
HMGN2				0.593354	0.001121	1				-0.264236	0.001521	-1				-0.478195	0.000595	-1
HNRNPDL				-1.07793	4.52e-07	-1				-0.171207	0.03089	-1	-0.722466	0.0001397	-1
HOMER2				0.703924	0.0002656	1				0.183605	0.006575	1				0.329522	0.006026	1
HOMER3				0.339345	0.04695	1				0.241782	0.01167	1				0.486206	0.003034	1
HSD17B11				-0.692427	0.0001465	-1				-0.244887	0.0009584	-1				-0.296311	0.01282	-1
HSP90AB1	0.766357	0.03991	1							-0.240009	0.02748	-1	-1.07039	1.01e-07	-1
HSPA1A	1.43401	2.64e-05	1				-0.349365	0.0001129	-1	-0.109695	0.03506	-1
HSPA1B	1.00376	0.0009269	1							-0.180148	0.0003485	-1				-0.23634	0.00779	-1
HSPA6	1.24914	0.002024	1							0.170719	0.00108	1	0.64273	0.0003878	1
HSPD1				0.715723	0.000186	1				-0.370722	9.06e-06	-1	-0.877352	3.31e-05	-1	-0.390668	0.008157	-1
HSPH1	1.0389	0.002271	1							-0.244887	0.005909	-1	-0.468844	0.02151	-1
HTATIP2	0.80138	0.02444	1							0.251195	0.01525	1	0.471129	0.02424	1
HTATSF1P2				0.523878	0.001585	1	0.236843	0.0003336	1	0.0998964	0.005927	1				0.22095	0.008864	1
HTRA2				0.43694	0.01223	1				-0.24732	0.006962	-1				-0.353888	0.03743	-1
IDUA				0.390812	0.02677	1				-0.551885	1.18e-07	-1				-0.698663	1.83e-05	-1
IFI27L2				-0.533065	0.002855	-1	0.209061	0.007456	1	0.262573	0.001609	1				0.414653	0.006011	1
IL1B				0.574326	0.0003209	1	-0.321928	0.0004611	-1	-0.0257376	0.02011	-1	-1.96495	6.76e-13	-1
IL32				0.268469	0.01388	1				0.235484	0.005011	1	0.788116	0.0002832	1
IL4R				-1.01792	8.03e-07	-1	0.138442	0.03083	1	0.334425	0.0001338	1				0.851001	2.21e-08	1
INKA1				0.504509	0.005055	1				0.263958	0.003362	1				0.381573	0.02462	1
IP6K2				0.3709	0.04361	1							-0.532068	0.005952	-1	-0.275007	0.03962	-1
IRF5				0.430898	0.001107	1	-0.0648829	0.01879	-1	-0.129613	0.008585	-1	0.303472	0.04574	1	-0.264236	0.0003468	-1
ITGA2B				0.483985	0.007876	1	0.184425	0.001535	1	0.37146	1.84e-06	1	0.109359	0.01664	1	0.396498	0.003055	1
ITGB5				0.519114	0.003286	1				0.226341	0.001382	1				0.363828	0.00172	1
JADE1				0.500014	0.004557	1				-0.21661	0.0122	-1	-0.551885	0.003556	-1	-0.320773	0.04919	-1
JOSD2				0.37501	0.04703	1				-0.439357	1.5e-05	-1				-0.751035	5.22e-06	-1
JUP				0.585323	0.0008855	1				-0.226509	0.0002275	-1				-0.319618	0.0042	-1
KCTD12				-0.496718	0.004254	-1				0.271775	0.0005946	1	1.60121	7.29e-11	1	0.310611	0.04819	1
KCTD7				0.365871	0.04665	1	0.16942	0.005991	1							0.218095	0.0266	1
KIAA0408				0.778432	6.54e-05	1				0.0741525	0.0007586	1				0.103457	0.01145	1
KIR2DL4				-0.648005	0.0002725	-1				0.174621	0.0008731	1				0.235654	0.02946	1
KIR3DL2				-0.426533	0.001712	-1	0.0779544	3.63e-05	1	0.0457292	0.002904	1				0.0785637	0.04766	1
KLRD1				-0.358396	0.043	-1	-0.0621217	0.02575	-1	-0.104337	0.006241	-1
KLRF1				-0.56267	0.001808	-1	0.354575	1.71e-05	1				0.795609	0.0001166	1
KPNA2				-0.739848	9.54e-05	-1				-0.144046	0.03971	-1	-0.67084	0.0002799	-1
LACTB				-0.510962	0.003759	-1				-0.21661	0.02773	-1	-0.559737	0.001847	-1
LAIR2				-0.397255	0.02341	-1				0.397638	9.43e-07	1				0.567468	3.84e-06	1
LEPROT				-0.440421	0.01468	-1				0.162622	0.02519	1	0.484994	0.01574	1
LGALS9				0.477141	0.005466	1				-0.31034	0.001482	-1				-0.455229	0.006045	-1
LGALSL				-0.468844	0.007568	-1				0.281562	0.001208	1	0.465142	0.002358	1	0.554909	0.0001205	1
LINC00999				0.775466	0.0001371	1				-0.348232	0.0004068	-1				-0.681674	5.95e-06	-1
LPAR5				0.341172	0.03525	1				0.146563	0.04833	1	0.792107	0.0001328	1
LPAR6				-0.571434	0.001013	-1	0.435963	2.91e-06	1	0.247423	0.00514	1	0.625934	0.002551	1
LSP1				0.531156	0.002606	1	-0.190299	0.004632	-1	-0.336855	0.0005637	-1				-0.512985	0.001194	-1
LTB				-0.597412	0.0007156	-1				0.270382	0.002095	1	0.459179	0.02936	1
LY6G6D				0.403733	0.0257	1				0.226172	0.04573	1				0.442026	0.02196	1
LYPLA2				-0.509949	0.004222	-1				-0.279768	0.00677	-1				-0.463622	0.007809	-1
MAD2L1BP				0.958196	4.45e-06	1							-0.50284	0.01373	-1	-0.155749	0.02783	-1
MAF				0.667951	0.0001874	1				0.495329	1.06e-06	1	0.897543	2.89e-05	1	0.615508	0.0002399	1
MBD2				-0.652601	0.0005532	-1				-0.350497	0.0003609	-1				-0.618239	0.0001637	-1
MBTPS1				0.4935	0.005488	1				-0.206643	0.004084	-1				-0.280956	0.04388	-1
MED22				-0.769772	5.58e-05	-1				-0.225275	0.02195	-1				-0.458382	0.003772	-1
MED23				-0.632268	0.0004165	-1				-0.16092	0.02556	-1	-0.97673	1.9e-06	-1
MED25				0.35089	0.04709	1	-0.232661	0.005093	-1	-0.246104	0.005824	-1
METRNL				0.655626	0.0006246	1				-0.168642	0.02045	-1	-0.927517	5.79e-06	-1
MICB				0.484388	0.003976	1				0.321027	0.0003757	1				0.383642	0.02501	1
MIIP				0.513131	0.004404	1				-0.305679	0.002374	-1				-0.632268	4.62e-05	-1
MOB3C				0.443399	0.007736	1				0.445166	4.16e-06	1				0.480156	0.006022	1
MORC3				-0.496718	0.006437	-1				-0.200379	0.007466	-1				-0.296311	0.009373	-1
MRPL13				-0.493647	0.007995	-1	0.385526	2.35e-05	1				0.549409	0.007037	1
MRPL15				-0.736388	0.000103	-1	0.150241	0.031	1				0.661091	0.001457	1
MRPL17				-0.509949	0.006117	-1	0.165693	0.02626	1	0.230736	0.009021	1
MRPL43				0.421979	0.0112	1				0.184425	0.01349	1				0.343916	0.008608	1
MRPL57				-0.40163	0.02698	-1	0.111228	0.03267	1				0.502056	0.0187	1
MRPS23				0.419662	0.01839	1	0.304184	0.0004925	1				0.661547	0.001615	1
MSL3				0.613962	0.0007872	1				0.356606	1.04e-06	1	0.413692	0.04653	1	0.464942	0.0002104	1
MUC1				-0.765535	6.8e-05	-1				0.321567	0.001273	1				0.573038	0.0009334	1
MXI1				0.692455	0.0002599	1	-0.217851	0.01876	-1				-0.594549	0.002662	-1
MYEOV				-0.355016	0.01875	-1				0.406981	1.99e-05	1				0.869333	5.72e-08	1
MYOF				-0.410341	0.01479	-1				0.133527	0.02463	1	1.5454	2.98e-10	1
N4BP2				-0.400538	0.02496	-1				0.15859	0.01955	1				0.277184	0.04908	1
N4BP2L2				-1.03633	1.04e-06	-1				0.253085	0.01186	1	0.638681	4.05e-05	1
NAA16				-0.654436	0.000255	-1				-0.378512	5.19e-05	-1	-0.534062	0.007591	-1	-0.41792	0.02033	-1
NAA20				0.546035	0.002188	1	0.215077	0.03547	1	0.219606	0.04594	1
NAPRT				0.24127	0.03901	1	-0.211635	0.01001	-1	0.320846	6.29e-05	1	0.432649	0.04952	1	0.341537	0.02476	1
NAPSA				0.409661	0.02067	1	-0.225275	0.006298	-1	-0.168642	0.01023	-1				-0.27858	0.04193	-1
NCF1				0.534705	0.002662	1	-0.400538	4.51e-07	-1	-0.549916	4.99e-08	-1				-0.710173	9.16e-06	-1
NDEL1				-0.552869	0.001804	-1	-0.227741	0.01002	-1				-1.17632	2.03e-08	-1
NEXN				-0.364012	0.04093	-1				0.163106	0.02014	1	1.39365	5.25e-09	1
NFE2				0.37632	0.007335	1	-0.246104	0.003142	-1	0.478547	2.58e-07	1	0.947306	1.65e-05	1	0.519528	0.00118	1
NFIC				0.652901	0.0004453	1				-0.105678	0.0002429	-1				-0.180148	0.0004131	-1
NFKB2				0.55131	0.002458	1				-0.292782	0.00313	-1	-1.33743	1.74e-09	-1
NFXL1				-0.807355	3.32e-05	-1	0.236673	0.0001438	1				0.461959	0.02987	1
NKX3-1				-0.332278	0.04659	-1	-0.271426	2.18e-06	-1				-0.671746	0.0005754	-1
NLRP2				0.460568	0.002849	1				-0.243669	7.1e-05	-1				-0.404903	5.21e-05	-1
NMRK1				0.547299	0.001847	1	0.256873	0.00373	1	0.239736	0.006326	1
NOC3L				-0.872632	1.18e-05	-1	0.15859	0.04544	1				1.1678	2.63e-07	1
NOC4L				0.560856	0.002379	1				-0.231432	0.04287	-1				-0.615416	0.0002409	-1
NOTCH2NLA				-0.929791	4.24e-06	-1							0.742265	0.0004108	1	0.169258	0.01242	1
NPDC1				0.569822	0.0008377	1				0.471129	9.71e-07	1				0.699701	1.15e-05	1
NPIPA1				-0.505891	0.004344	-1				-0.444667	5.25e-07	-1				-0.512985	0.0004787	-1
NRCAM				-0.710173	0.0001562	-1				-0.253384	0.009973	-1				-0.687956	1.23e-05	-1
NSUN5P2				0.730727	0.000171	1				-0.353888	2.13e-05	-1				-0.41792	0.004328	-1
NT5C3B				-0.432959	0.01869	-1				0.280685	0.004534	1				0.442811	0.01143	1
NUAK2				0.679458	0.0003186	1	-0.214125	0.008147	-1	-0.493647	9.34e-07	-1				-0.69332	2.05e-05	-1
NUSAP1				-0.37629	0.01989	-1							0.475535	0.0321	1	0.369408	0.04913	1
OFD1				-0.683472	0.000238	-1				-0.267835	0.001484	-1	-0.421156	0.02533	-1
OR2A1				0.299915	0.01575	1				-0.189034	0.01464	-1				-0.365133	0.002474	-1
OSBPL7				0.559367	0.001893	1				-0.382944	8.08e-05	-1				-0.574344	0.0003915	-1
OSTC				-0.685267	0.0002216	-1				-0.329985	5.37e-05	-1				-0.381837	0.01073	-1
OXNAD1				-0.418999	0.02319	-1				-0.350497	0.0001205	-1				-0.407081	0.01534	-1
P2RX5				0.452846	0.01476	1				-0.308011	0.001502	-1				-0.757877	2.14e-06	-1
P2RY13				-0.371838	0.04097	-1				0.20573	0.0004041	1	1.51251	5.35e-10	1
PADI4				-0.288063	0.03438	-1	-0.24123	0.00148	-1	0.301693	0.0001983	1	0.412539	0.03492	1	0.351074	0.04078	1
PALLD	0.889236	0.01048	1							0.212233	0.02454	1	0.774972	0.0002834	1	0.398589	0.02054	1
PARP10				0.660178	0.0006158	1				-0.520045	6.36e-08	-1				-0.625738	1.42e-05	-1
PCYOX1L				-0.60027	0.0008902	-1				-0.317304	0.0008421	-1				-0.411426	0.0232	-1
PDCD10				-0.827819	2.62e-05	-1	0.220278	0.01265	1				0.701811	0.0007613	1
PDE5A				0.368104	0.03946	1				0.415615	5.69e-06	1	0.461363	0.00463	1	0.488836	0.00159	1
PDGFC				-0.903038	4.92e-06	-1							0.683159	0.001481	1	0.330973	0.02901	1
PDPR				-0.516015	0.003538	-1				-0.1137	0.02135	-1				-0.314986	0.02458	-1
PEX6				0.36049	0.03578	1				0.128945	0.005674	1	0.475535	0.02108	1	0.138918	0.01003	1
PGK1				-0.878137	8.39e-06	-1				-0.157044	0.04061	-1	-1.28924	2.34e-09	-1
PHC2				0.904008	1.45e-05	1	-0.138814	0.03054	-1				-0.499782	0.01159	-1	-0.27739	0.0429	-1
PI16				-0.38405	0.03049	-1	0.124377	0.0372	1	0.342634	7.11e-05	1				0.587056	2.54e-05	1
PIK3C2A				-1.4631	2.52e-09	-1							-0.632268	0.001379	-1	-0.185232	0.01676	-1
PILRA				0.519528	0.004971	1	-0.230203	0.009331	-1	-0.121679	0.03979	-1
PILRB				-0.602172	0.0004639	-1				-0.226509	0.004283	-1				-0.356144	0.0001817	-1
PKD1				0.412731	0.01821	1				-0.269033	0.003999	-1				-0.437228	0.005923	-1
PLAUR				0.30187	0.03421	1	-0.151859	0.02306	-1				-2.17632	2.61e-16	-1
PLCG1				-0.589763	0.0009491	-1	-0.159629	0.0485	-1	-0.282143	0.002271	-1
PLEC				0.505533	0.005779	1				-0.424385	1.44e-05	-1				-0.534062	0.001049	-1
PLEKHF2				0.336246	0.04287	1				-0.192825	0.008826	-1	-0.614474	0.001134	-1
PLOD2				-0.488515	0.006123	-1				0.346665	9.68e-05	1				0.782149	4.78e-08	1
PMEPA1				0.683623	0.0003162	1							-0.718088	0.001284	-1	-0.326537	0.01276	-1
POLR3GL				-0.495695	0.00809	-1	0.315989	0.001493	1				0.491673	0.02556	1
POMT1				0.447525	0.009328	1				0.281737	0.001588	1				0.418697	0.01034	1
POMZP3				-0.269033	0.02899	-1				-0.276199	0.00163	-1				-0.612588	1.51e-05	-1
PPHLN1				-0.810649	2.79e-05	-1				-0.0607392	0.0471	-1				-0.147958	0.001977	-1
PPIG				-0.592636	0.001459	-1	0.180986	0.03627	1				0.581648	0.006401	1
PPP1R15B				-1.07724	2.68e-07	-1							-1.00504	9.22e-07	-1	-0.21661	0.02652	-1
PRDX4				-0.745022	9.4e-05	-1	0.221791	0.0001926	1				0.836244	0.0001253	1
PRKDC				-0.425459	0.02053	-1				0.238885	0.000782	1	0.774478	0.0002202	1	0.296013	0.02603	1
PROSER2				0.595969	0.001404	1				0.211565	0.0251	1				0.451267	0.001867	1
PRR5				-0.43189	0.01415	-1				-0.509949	3.67e-07	-1				-0.568519	0.0006085	-1
PRSS23				-0.462576	0.006817	-1				0.367732	2.59e-05	1	0.534078	0.004191	1	0.496346	0.0009831	1
PRTFDC1				-0.418999	0.0173	-1				0.204566	0.04816	1				0.449887	0.005519	1
PSRC1				-0.850399	2.25e-05	-1				0.198593	0.03973	1				0.367918	0.02858	1
PTK2B				-0.547943	0.002713	-1				-0.244887	0.005465	-1				-0.327687	0.04298	-1
PTMA				-0.62293	0.0007641	-1	-0.0440443	0.001754	-1	-0.212881	0.001638	-1	-0.536053	0.005201	-1
PTPN12				-0.428678	0.01724	-1				-0.109695	0.03658	-1	-0.602172	0.002294	-1
PTPRC				0.570036	0.001999	1	-0.104337	0.03513	-1	0.344831	9.19e-06	1	0.625267	0.002754	1	0.590528	1.26e-05	1
PYGO2				0.465142	0.008802	1				-0.328836	0.0009637	-1				-0.415759	0.0272	-1
PYROXD1				-0.58111	0.001441	-1							0.874084	4.64e-05	1	0.417155	0.01592	1
QPCT				-0.41684	0.01506	-1	-0.136191	0.02241	-1	-0.0579701	0.0286	-1
RAB10				-1.01006	1.02e-06	-1				0.22011	0.02013	1	2.14369	6.88e-16	1
RAB11FIP3				-0.574344	0.001466	-1				0.213906	0.02995	1	0.621045	0.002985	1
RAB18				-0.90766	8.38e-06	-1							-0.464668	0.01919	-1	-0.244887	0.03448	-1
RANBP1				-0.505891	0.004743	-1				-0.27739	0.004219	-1				-0.369606	0.04639	-1
RANBP2				-0.794104	4.38e-05	-1							-1.45891	1.09e-10	-1	-0.420078	0.008032	-1
RARA				0.413499	0.01415	1				-0.238787	0.01521	-1	-0.678973	0.0003657	-1
RASSF1				0.905088	1.16e-05	1				-0.212881	0.01113	-1				-0.496718	4.51e-05	-1
RASSF5				0.815783	4.25e-05	1							-0.742437	6.11e-05	-1	-0.290424	0.01139	-1
RBM38				0.433039	0.01706	1	-0.232661	0.0003768	-1				-1.04544	2.87e-07	-1
RBM4				0.637783	0.0006409	1				-0.289244	0.001498	-1				-0.243669	0.02551	-1
RBM43				-0.543001	0.002529	-1				0.38289	4.15e-07	1				0.715486	1.01e-08	1
RCBTB2				-0.955313	3.9e-06	-1							0.934841	2.14e-05	1	0.307573	0.01278	1
RECQL				-0.710173	0.0001757	-1				0.21073	0.02995	1	1.40316	3.27e-09	1
RFLNB				0.691756	0.000341	1	-0.119024	0.03885	-1	-0.40163	7.99e-05	-1				-0.558757	0.001109	-1
RGS10				0.853084	2.21e-05	1	0.167961	0.01405	1	0.255839	0.01286	1
RIOK2				-0.418999	0.0283	-1	0.199918	0.03482	1				0.466736	0.02455	1
RIOX1				-0.67084	0.0003017	-1				0.294597	0.002729	1				0.383831	0.04881	1
RNASE2				-0.312665	0.01072	-1	0.290004	1.87e-06	1	0.0908029	0.009676	1	0.896737	4.28e-05	1
RNASE4				0.817816	2.82e-05	1				0.134477	0.03655	1				0.237524	0.03152	1
RNASE6				0.492281	0.004921	1	0.0851294	0.0166	1	0.114035	0.01165	1	0.906981	4.29e-05	1
RNF125				-0.352759	0.04033	-1				-0.0243197	0.001577	-1	-0.731183	0.0001088	-1	-0.0468403	0.02265	-1
RPAP2				-0.57628	0.001429	-1				0.231752	0.002416	1				0.299028	0.04416	1
RPL10A				-0.442545	0.01218	-1				-0.587845	9.84e-09	-1				-0.603122	0.0001922	-1
RPS23				-0.484396	0.007336	-1	-0.0758749	0.004543	-1	-0.283329	9.4e-05	-1	-0.422233	0.03055	-1	-0.312665	0.01482	-1
RPS26				0.815529	3.14e-05	1	0.299205	2.1e-07	1				0.151683	0.03887	1
RPS27L				-0.370722	0.04067	-1	0.541618	3.92e-08	1				0.841146	8.93e-05	1
RSU1				-0.823749	1.74e-05	-1				0.18164	0.001395	1				0.263092	0.01037	1
RTEL1				0.714302	0.0002843	1				-0.225275	0.04054	-1				-0.587845	0.0003297	-1
RUBCNL				0.437721	0.0113	1	-0.233888	0.00208	-1	-0.27023	0.001803	-1				-0.386259	0.01653	-1
RXRB				-0.404903	0.02358	-1				0.481969	1.3e-06	1				0.567254	0.0007359	1
S100A6	0.951764	0.009556	1							0.374823	7.88e-05	1				0.409087	0.0229	1
S100A8	0.905899	2.7e-05	1				0.388355	8.33e-06	1	0.269164	0.003159	1
S100P				0.494922	0.003167	1	0.637334	1.93e-10	1	0.369595	9.73e-06	1	-0.695103	0.0001277	-1	0.673003	1.36e-06	1
S1PR1				-0.642471	0.0004217	-1				-0.323082	7.33e-05	-1				-0.343692	0.02561	-1
S1PR4				0.436354	0.02387	1				-0.457332	3.85e-06	-1				-0.483364	0.006053	-1
SAMD9				-0.507921	0.003812	-1	0.120765	0.0276	1				1.60603	6.07e-11	1
SELP				0.652221	0.0004862	1				0.411195	6.92e-06	1				0.684318	7.81e-06	1
SEPTIN2				-0.707525	0.0001836	-1				-0.22033	0.01462	-1	-0.566572	0.002664	-1
SEPTIN4				0.405834	0.01945	1				0.267948	0.001906	1				0.430703	0.005057	1
SEPTIN7				-0.842375	1.47e-05	-1	-0.0635029	0.04556	-1				-0.323082	0.03097	-1
SH2D1B				-0.420078	0.01352	-1	0.111695	0.04605	1				0.915664	2.98e-05	1
SH3BGRL2				-0.368489	0.04576	-1				0.370154	8.34e-06	1	0.299205	0.01403	1	0.384772	0.009028	1
SHMT1				0.406216	0.01579	1				0.244514	0.006299	1				0.33825	0.04651	1
SIAH1				0.524293	0.003614	1				-0.182692	0.01724	-1	-0.847997	8.78e-06	-1
SIGIRR				0.384584	0.02742	1				-0.250962	0.001426	-1				-0.302173	0.02963	-1
SKA2				-1.26484	1.07e-08	-1							1.18902	2.11e-07	1	0.391948	0.02958	1
SLAMF8	0.72142	0.03992	1	0.433039	0.005818	1							0.469729	0.03181	1	0.317247	0.0187	1
SLC16A11				0.53366	0.004029	1				-0.23634	0.0287	-1				-0.619178	0.0001194	-1
SLC1A7				-0.00288251	0.03192	-1				0.407555	9.68e-06	1				0.806165	9.38e-08	1
SLC26A11				0.384207	0.01851	1				0.359379	0.0002727	1				0.453439	0.009745	1
SLC38A11				-0.543001	0.002548	-1				0.205064	0.01857	1				0.384395	0.00616	1
SLC39A3				0.459378	0.01122	1				-0.273814	0.003731	-1				-0.328836	0.01699	-1
SLC52A2				0.381761	0.02251	1				0.316708	0.001729	1				0.416192	0.03278	1
SLC5A3	0.991943	0.005949	1										0.824699	0.0001635	1	0.434793	0.004534	1
SLC8A3				-0.485427	0.005869	-1				0.224992	0.008882	1				0.460767	0.001017	1
SLX4IP				-0.783247	4.12e-05	-1				0.350522	6.37e-05	1	0.441047	0.04603	1	0.678303	2.86e-06	1
SMARCD2				-0.396159	0.02387	-1				0.232769	0.01487	1	0.433428	0.04284	1
SOD2				0.388922	0.02977	1	-0.181421	0.01396	-1				-0.710173	0.0003703	-1
SORBS3				0.770535	7.94e-05	1				-0.296311	0.004121	-1				-0.528071	0.001295	-1
SPHAR				-0.557778	0.002024	-1				0.173645	0.04194	1				0.375759	0.006694	1
SPPL2B				0.437721	0.0126	1				-0.336855	0.0009021	-1				-0.722466	9.13e-06	-1
SPRY1				-0.474047	0.01008	-1							-0.537048	0.006701	-1	-0.421156	0.004686	-1
SRP9				-0.701327	0.0002648	-1	0.204399	0.01015	1				0.639804	0.002312	1
SRSF10				0.447721	0.01049	1				-0.275007	0.0007453	-1				-0.370722	0.01245	-1
SRSF11				-0.558757	0.001179	-1				-0.123004	0.03439	-1	-1.43723	1.35e-10	-1
SSBP2				-1.09761	1.67e-07	-1				0.209061	0.03337	1	0.534078	0.01185	1
ST3GAL3				0.429537	0.01734	1				0.247765	0.007938	1				0.371086	0.03151	1
ST3GAL4				0.641829	0.0004548	1				0.324636	0.0008993	1				0.513543	0.003071	1
STAG3L1				0.361602	0.04511	1				-0.369606	1.05e-05	-1				-0.421156	0.004446	-1
STK17B				-0.791606	3.14e-05	-1				-0.0468403	0.004119	-1	-1.11902	4.1e-08	-1
STX5				-0.391768	0.03864	-1				-0.391768	0.0001249	-1				-0.487486	0.009125	-1
STYXL1				0.770043	8.59e-05	1				0.234975	0.008095	1				0.433234	0.006577	1
SYTL4				-0.92448	3.89e-06	-1				0.381949	1.66e-05	1				0.656763	5.25e-06	1
TAGLN2	0.835986	0.023	1				-0.237564	0.009046	-1	-0.23634	0.0003628	-1
TARBP2				0.655626	0.0005375	1				0.229721	0.02454	1				0.381385	0.03953	1
TBC1D17				0.406407	0.0186	1				-0.421156	3.26e-05	-1				-0.645241	4.67e-05	-1
TCEAL3				-0.782409	3.94e-05	-1				0.342086	0.0007202	1				0.5245	0.003942	1
TCEAL8				-0.449957	0.01905	-1	0.228875	0.02461	1				0.741783	0.0004303	1
TCF7				0.455811	0.009346	1				-0.332278	0.001085	-1				-0.611645	0.0003532	-1
TCIRG1				0.526577	0.006643	1				-0.235114	0.003391	-1				-0.133564	0.03263	-1
TES				0.358639	0.04676	1				-0.302173	0.0003774	-1				-0.342555	0.03523	-1
TGFBR2				-0.624803	0.0003198	-1				-0.153157	0.002082	-1	-0.692427	0.0003582	-1	-0.31034	0.0004422	-1
TLR10				0.571322	0.001278	1				-0.27858	0.003752	-1				-0.41792	0.01736	-1
TLR8				0.384395	0.02921	1				0.156498	0.003416	1	2.29195	4.49e-17	1
TMEM107				-0.72334	3.89e-06	-1							0.648372	0.002546	1	0.482372	0.001106	1
TMEM140				0.636885	0.0003418	1	-0.276199	0.0003199	-1	0.308109	9.22e-05	1	0.3893	0.04574	1	0.322289	0.02924	1
TMEM144				-0.480265	0.0079	-1				0.312223	0.0002803	1	0.511896	0.01684	1	0.496549	0.001093	1
TMEM40				0.36829	0.03701	1				0.200913	0.02174	1				0.362529	0.01872	1
TMEM45B				0.47313	0.007562	1				0.231075	0.00371	1				0.587273	3.59e-06	1
TMSB4Y				-1.17951	1.95e-08	-1				0.22651	6.28e-06	1				0.352916	4.79e-07	1
TMX1				-1.12433	1.71e-07	-1	0.315271	8.57e-05	1				0.751222	0.0004254	1
TNFRSF13C				0.548987	0.001278	1							-0.546956	0.002001	-1	-0.375178	0.02163	-1
TNRC6A				-0.67084	0.0002508	-1				-0.380729	0.000102	-1	-0.520045	0.006777	-1	-0.504875	0.002499	-1
TP53I3				0.722134	0.0001938	1				0.205231	0.03479	1				0.494312	0.003039	1
TP53TG3D				-0.538041	0.0006683	-1				-0.0867838	0.04108	-1				-0.221568	0.0007353	-1
TPM2				0.507378	0.003534	1				-0.458382	7.5e-07	-1				-0.60027	7.62e-05	-1
TPM4				0.567468	0.001226	1				-0.163499	0.0369	-1	-0.956057	2.84e-06	-1
TRAT1				0.366429	0.02303	1	0.216418	0.03275	1				0.957076	8.23e-06	1
TRIM10				0.547932	0.003217	1				0.314015	0.002434	1				0.64679	2.25e-05	1
TRMT2B				0.565759	0.00149	1				-0.0579701	0.005263	-1				-0.0881416	0.03118	-1
TSEN15				-1.08202	3.44e-07	-1				0.235484	0.01166	1	0.541198	0.01212	1
TSHZ3				-0.536053	0.001817	-1				0.231752	0.009956	1				0.389489	0.02854	1
TSPAN3				-0.501821	0.005555	-1				-0.314986	0.0002345	-1				-0.488515	0.0004885	-1
TUBA1A				-0.652601	0.0003385	-1	-0.231432	0.02573	-1	-0.178874	0.01265	-1
TUBGCP6				0.440068	0.01182	1				-0.187768	0.01931	-1				-0.380729	0.01827	-1
TXNDC9				-1.03633	7.53e-07	-1	0.156338	0.02491	1				1.24161	5.59e-08	1
UBE2B				-0.480265	0.009544	-1				-0.157044	0.04277	-1	-0.669027	0.0004097	-1
UBE2H				-0.77905	6.38e-05	-1	-0.147958	0.03088	-1				-0.587845	0.001884	-1
UCP3				-0.415759	0.01213	-1				0.225666	0.02927	1				0.636436	4.49e-05	1
UGGT1				-0.35727	0.03895	-1				0.0952654	0.04831	1	0.507788	0.01575	1
UNC93B1				0.503896	0.004817	1				-0.271426	0.006658	-1				-0.617298	6.1e-05	-1
USP9Y				-2.3978	1.04e-17	-1				-0.0426443	0.001592	-1				-0.0356239	5.97e-05	-1
VCAN				-0.434028	0.01357	-1	0.201244	0.00271	1				0.94675	2.41e-05	1
VEZF1				-0.366252	0.0461	-1				0.214575	0.01418	1	0.581864	0.006323	1
VEZT				-0.709291	0.0001992	-1				0.221623	0.02673	1	0.687567	0.0008787	1
VNN1				-0.424385	0.0156	-1				0.207561	0.0003147	1	1.29584	8.87e-09	1	0.395359	0.0007265	1
WDR41				-0.941858	2.53e-06	-1				0.198759	0.004252	1				0.240929	0.03428	1
WDR97				-0.67717	0.0003106	-1				0.199255	0.01578	1				0.310254	0.0429	1
WWOX				0.63913	0.0005583	1				0.156177	0.03609	1				0.407364	0.0009833	1
YRDC				0.486206	0.00525	1				-0.0356239	0.005875	-1	-0.549916	0.004486	-1
ZAP70				0.475334	0.01487	1				-0.253384	0.0008482	-1				-0.308011	0.003884	-1
ZDHHC13				0.365871	0.0319	1				0.205231	0.04364	1	0.686406	0.00136	1
ZDHHC16				-0.573375	0.00224	-1							0.902929	3.42e-05	1	0.155052	0.03264	1
ZFP36L1				-0.590722	0.001366	-1	-0.316146	0.0003115	-1				-0.590722	0.0005835	-1
ZNF154				-0.77484	5.56e-05	-1				-0.24732	0.01271	-1				-0.372952	0.04576	-1
ZNF302				-0.831067	2.8e-05	-1	0.210229	0.04606	1				1.33862	1.06e-08	1
ZNF345				0.339345	0.04149	1				-0.194087	0.03963	-1				-0.453122	0.0007587	-1
ZNF365				0.636436	0.0004469	1				0.178698	0.01246	1				0.371646	0.001267	1
ZNF385D				0.417155	0.02469	1				0.199587	0.02186	1				0.437721	0.0005408	1
ZNF580				-1.01364	9.39e-07	-1				-0.344828	0.0001855	-1				-0.496718	0.0009479	-1
ZNF672				0.377257	0.04568	1				0.291239	0.001609	1				0.366615	0.0416	1
ZNF777				-0.590722	0.001048	-1				0.252913	0.008502	1				0.429149	0.01287	1
ZNF791				-0.534062	0.002486	-1				-0.153157	0.01435	-1	-1.13488	6.57e-08	-1
ZNFX1				-0.438293	0.01366	-1	-0.153157	0.02669	-1	-0.238787	0.02689	-1
ZRANB2				-0.583038	0.001175	-1	0.164561	0.03656	1				0.604718	0.004047	1
