# Supplementary material for: In Silico Analysis Highlights Potential Predictive Indicators Associated with Secondary Progressive Multiple Sclerosis
Source: Int J Mol Sci. 2024 Mar 16;25(6):3374. doi: 10.3390/ijms25063374 (PMC10970138; doi:10.3390/ijms25063374)
Supplement: Supplementary file 1 [file ijms-25-03374-s001.zip › Supplementary Table S3.xlsx]

## Sheet: RuLu Enriched BPs
Supplementary Table S3. Enriched Biological Processes for RuLu DEGs
Term	Overlap	p-value	q-value	Genes
Positive Regulation Of Apoptotic Signaling Pathway (GO:2001235)	5/62	1.45851e-05	0.00670745	WWOX; CTSL; SEPTIN4; S100A8; STYXL1
Negative Regulation Of calcineurin-NFAT Signaling Cascade (GO:0070885)	3/11	1.94376e-05	0.00670745	HOMER2; FHL2; HOMER3
Negative Regulation Of Calcineurin-Mediated Signaling (GO:0106057)	3/11	1.94376e-05	0.00670745	HOMER2; FHL2; HOMER3
Granulocyte Activation (GO:0036230)	3/12	2.58227e-05	0.00670745	CXCL8; CXCR2; CAMP
Defense Response To Bacterium (GO:0042742)	7/204	7.44162e-05	0.0154637	SELP; H2BC11; SLAMF8; RNASE6; ANG; S100A8; CAMP
Neutrophil Activation (GO:0042119)	3/18	9.37129e-05	0.016228	CXCL8; CXCR2; CAMP
Receptor Internalization (GO:0031623)	4/51	0.000122762	0.0168805	CXCL8; CXCR2; CD36; DRD3
Calcium-Mediated Signaling Using Intracellular Calcium Source (GO:0035584)	3/20	0.000129975	0.0168805	SELP; PTPRC; CLU
Negative Regulation Of Interleukin-2 Production (GO:0032703)	3/21	0.000151088	0.0174423	PTPRC; HOMER2; HOMER3
Antigen Processing And Presentation Of Exogenous Peptide Antigen Via MHC Class II (GO:0019886)	3/26	0.000290049	0.0292864	HLA-DRB5; CTSL; HLA-DRB1
Antimicrobial Humoral Immune Response Mediated By Antimicrobial Peptide (GO:0061844)	4/65	0.000315263	0.0292864	CXCL8; H2BC11; RNASE6; CAMP
Antigen Processing And Presentation Of Peptide Antigen Via MHC Class II (GO:0002495)	3/28	0.000362821	0.0292864	HLA-DRB5; CTSL; HLA-DRB1
Positive Regulation Of Leukocyte Tethering Or Rolling (GO:1903238)	2/6	0.000366432	0.0292864	SELP; ST3GAL4
Immunoglobulin Mediated Immune Response (GO:0016064)	3/30	0.000446402	0.0319781	HLA-DRB5; TLR8; HLA-DRB1
Protein Tetramerization (GO:0051262)	4/73	0.000491584	0.0319781	GBP5; SHMT1; CLU; HLA-DRB1
Antigen Processing And Presentation Of Exogenous Peptide Antigen (GO:0002478)	3/31	0.000492444	0.0319781	HLA-DRB5; CTSL; HLA-DRB1
Defense Response To Gram-negative Bacterium (GO:0050829)	4/75	0.00054478	0.0332957	SELP; H2BC11; RNASE6; CAMP
Regulation Of calcineurin-NFAT Signaling Cascade (GO:0070884)	3/34	0.000648484	0.036904	HOMER2; FHL2; HOMER3
Positive Regulation Of Immune Response (GO:0050778)	4/80	0.000695498	0.036904	GBP5; PTPRC; TLR8; HLA-DRB1
Regulation Of T Cell Mediated Cytotoxicity (GO:0001914)	3/36	0.000768177	0.036904	PTPRC; HLA-DRB1; MICB
Regulation Of Defense Response To Virus By Host (GO:0050691)	3/37	0.000832937	0.036904	CGAS; TARBP2; MICB
Regulation Of Store-Operated Calcium Entry (GO:2001256)	2/9	0.000870867	0.036904	HOMER2; HOMER3
Calcium-Mediated Signaling (GO:0019722)	4/85	0.000873595	0.036904	SELP; CXCL8; PTPRC; CLU
Defense Response To Gram-positive Bacterium (GO:0050830)	4/85	0.000873595	0.036904	H2BC11; RNASE6; ANG; CAMP
Defense Response To Symbiont (GO:0140546)	5/148	0.000887969	0.036904	GBP5; PTPRC; RNASE6; TLR8; CGAS
Positive Regulation Of Intrinsic Apoptotic Signaling Pathway (GO:2001244)	3/39	0.000972629	0.0388678	SEPTIN4; STYXL1; S100A8
Positive Regulation Of Intracellular Signal Transduction (GO:1902533)	9/525	0.00126713	0.0487611	SELP; FLCN; PTPRC; TRAT1; ZDHHC13; SEPTIN4; S100A8; HLA-DRB1; STYXL1
Regulation Of Leukocyte Tethering Or Rolling (GO:1903236)	2/11	0.00132184	0.0490497	SELP; ST3GAL4
Positive Regulation Of Biosynthetic Process (GO:0009891)	3/44	0.00138426	0.0495946	CXCL8; CD36; SLC5A3

## Sheet: RuLu Enriched CCs
Supplementary Table S3. Enriched Cellular Components for RuLu DEGs
Term	Overlap	p-value	q-value	Genes
Endocytic Vesicle (GO:0030139)	7/196	5.7847e-05	0.00453472	CD163; HLA-DRB5; ITGB5; CTSL; CTLA4; CD36; HLA-DRB1
Platelet Alpha Granule Membrane (GO:0031092)	3/16	6.47818e-05	0.00453472	SELP; ITGA2B; CD36
Cytoplasmic Vesicle Membrane (GO:0030659)	9/389	0.000145338	0.00678242	CD163; HLA-DRB5; PTPRC; CXCR2; TLR8; ZDHHC13; CD36; CLU; HLA-DRB1
Clathrin-Coated Endocytic Vesicle (GO:0045334)	4/85	0.000873595	0.0285361	FCGR1BP; HLA-DRB5; CTLA4; HLA-DRB1
Platelet Alpha Granule (GO:0031091)	4/89	0.00103752	0.0285361	SELP; ITGA2B; CD36; CLU
Endocytic Vesicle Membrane (GO:0030666)	5/159	0.00122297	0.0285361	FCGR1BP; CD163; HLA-DRB5; CD36; HLA-DRB1
MHC Class II Protein Complex (GO:0042613)	2/15	0.00249083	0.0433347	HLA-DRB5; HLA-DRB1
Bounding Membrane Of Organelle (GO:0098588)	11/819	0.00260667	0.0433347	GBP5; CD163; HLA-DRB5; PTPRC; CXCR2; ST3GAL4; TLR8; ZDHHC13; CD36; HLA-DRB1; ST3GAL3
Secretory Granule Membrane (GO:0030667)	6/279	0.0027858	0.0433347	SELP; PTPRC; ITGA2B; CXCR2; CD36; CLU

## Sheet: RuLu Enriched MFs
Supplementary Table S3. Enriched Molecular Functions for RuLu DEGs
Term	Overlap	p-value	q-value	Genes
Beta-Galactoside (CMP) Alpha-2,3-Sialyltransferase Activity (GO:0003836)	2/6	0.000366432	0.0470426	ST3GAL4; ST3GAL3
G Protein-Coupled Glutamate Receptor Binding (GO:0035256)	2/7	0.000511333	0.0470426	HOMER2; HOMER3

## Sheet: CLUp Enriched BPs
Supplementary Table S3. Enriched Biological Processeses for CLUp DEGs
Term	Overlap	p-value	q-value	Genes
Defense Response To Bacterium (GO:0042742)	7/204	1.00016e-07	6.65108e-05	SELP; H2BC11; RNASE6; SLAMF8; ANG; S100A8; CAMP
Granulocyte Activation (GO:0036230)	3/12	1.37567e-06	0.000457411	CXCL8; CXCR2; CAMP
Neutrophil Activation (GO:0042119)	3/18	5.06253e-06	0.000938201	CXCL8; CXCR2; CAMP
Antimicrobial Humoral Immune Response Mediated By Antimicrobial Peptide (GO:0061844)	4/65	6.90092e-06	0.000938201	CXCL8; H2BC11; RNASE6; CAMP
Calcium-Mediated Signaling Using Intracellular Calcium Source (GO:0035584)	3/20	7.05414e-06	0.000938201	SELP; PTPRC; CLU
Defense Response To Symbiont (GO:0140546)	5/148	8.54799e-06	0.000947402	GBP5; PTPRC; RNASE6; TLR8; CGAS
Defense Response To Gram-negative Bacterium (GO:0050829)	4/75	1.22216e-05	0.00111303	SELP; H2BC11; RNASE6; CAMP
Positive Regulation Of Immune Response (GO:0050778)	4/80	1.57954e-05	0.00111303	GBP5; PTPRC; TLR8; HLA-DRB1
Antigen Processing And Presentation Of Exogenous Peptide Antigen Via MHC Class II (GO:0019886)	3/26	1.59624e-05	0.00111303	HLA-DRB5; CTSL; HLA-DRB1
Antigen Processing And Presentation Of Peptide Antigen Via MHC Class II (GO:0002495)	3/28	2.00599e-05	0.00111303	HLA-DRB5; CTSL; HLA-DRB1
Calcium-Mediated Signaling (GO:0019722)	4/85	2.00848e-05	0.00111303	SELP; PTPRC; CXCL8; CLU
Defense Response To Gram-positive Bacterium (GO:0050830)	4/85	2.00848e-05	0.00111303	H2BC11; RNASE6; ANG; CAMP
Immunoglobulin Mediated Immune Response (GO:0016064)	3/30	2.47955e-05	0.00123472	HLA-DRB5; TLR8; HLA-DRB1
Antigen Processing And Presentation Of Exogenous Peptide Antigen (GO:0002478)	3/31	2.74162e-05	0.00123472	HLA-DRB5; CTSL; HLA-DRB1
Defense Response To Virus (GO:0051607)	5/189	2.78508e-05	0.00123472	GBP5; PTPRC; RNASE6; TLR8; CGAS
Antimicrobial Humoral Response (GO:0019730)	4/100	3.81116e-05	0.00158401	CXCL8; H2BC11; RNASE6; CAMP
Regulation Of T Cell Mediated Cytotoxicity (GO:0001914)	3/36	4.32642e-05	0.00169239	PTPRC; HLA-DRB1; MICB
Response To Lipid (GO:0033993)	4/110	5.53542e-05	0.00204503	SELP; CD36; S100A8; MICB
Receptor-Mediated Endocytosis (GO:0006898)	4/122	8.28548e-05	0.00289992	CXCL8; CTSL; CXCR2; CD36
Antibacterial Humoral Response (GO:0019731)	3/49	0.000109753	0.00364928	H2BC11; RNASE6; CAMP
Receptor Internalization (GO:0031623)	3/51	0.000123731	0.00391816	CXCL8; CXCR2; CD36
Positive Regulation Of Interleukin-1 Beta Production (GO:0032731)	3/57	0.000172487	0.0052138	GBP5; TLR8; CD36
Positive Regulation Of Apoptotic Signaling Pathway (GO:2001235)	3/62	0.000221492	0.00640402	WWOX; CTSL; S100A8
Positive Regulation Of Interleukin-1 Production (GO:0032732)	3/64	0.000243367	0.00674328	GBP5; TLR8; CD36
Negative Regulation Of Neuroinflammatory Response (GO:0150079)	2/13	0.000270579	0.00703224	PTPRC; CST7
Response To Molecule Of Bacterial Origin (GO:0002237)	3/69	0.000304046	0.00703224	SELP; CXCL8; S100A8
MHC Class II Protein Complex Assembly (GO:0002399)	2/14	0.000315297	0.00703224	HLA-DRB5; HLA-DRB1
Regulation Of Microglial Cell Activation (GO:1903978)	2/14	0.000315297	0.00703224	PTPRC; CST7
Peptide Antigen Assembly With MHC Class II Protein Complex (GO:0002503)	2/14	0.000315297	0.00703224	HLA-DRB5; HLA-DRB1
Neutrophil Chemotaxis (GO:0030593)	3/70	0.000317244	0.00703224	CXCL8; CXCR2; S100A8
Granulocyte Chemotaxis (GO:0071621)	3/73	0.000359042	0.00710707	CXCL8; CXCR2; S100A8
Protein Tetramerization (GO:0051262)	3/73	0.000359042	0.00710707	GBP5; CLU; HLA-DRB1
Negative Regulation Of Macrophage Activation (GO:0043031)	2/15	0.000363369	0.00710707	PTPRC; CST7
Dendritic Cell Chemotaxis (GO:0002407)	2/15	0.000363369	0.00710707	CXCR2; CLU
Neutrophil Migration (GO:1990266)	3/77	0.000420073	0.00798138	CXCL8; CXCR2; S100A8
Regulation Of Innate Immune Response (GO:0045088)	3/78	0.000436304	0.00805951	GBP5; TLR8; CGAS
cGMP-mediated Signaling (GO:0019934)	2/17	0.000469523	0.00843873	CGAS; CD36
Peptide Antigen Assembly With MHC Protein Complex (GO:0002501)	2/18	0.000527581	0.00877104	HLA-DRB5; HLA-DRB1
Positive Regulation Of NLRP3 Inflammasome Complex Assembly (GO:1900227)	2/18	0.000527581	0.00877104	GBP5; CD36
Dendritic Cell Migration (GO:0036336)	2/18	0.000527581	0.00877104	CXCR2; CLU
Regulation Of Interleukin-1 Beta Production (GO:0032651)	3/84	0.000542191	0.00879408	GBP5; TLR8; CD36
Immunoglobulin Production Involved In Immunoglobulin-Mediated Immune Response (GO:0002381)	2/19	0.000588944	0.00932494	HLA-DRB5; HLA-DRB1
Positive Regulation Of Antigen Receptor-Mediated Signaling Pathway (GO:0050857)	2/20	0.000653598	0.010108	PTPRC; TRAT1
Innate Immune Response In Mucosa (GO:0002227)	2/21	0.000721533	0.0106627	H2BC11; CAMP
Antigen Processing And Presentation Of Endogenous Peptide Antigen (GO:0002483)	2/21	0.000721533	0.0106627	HLA-DRB1; MICB
T Cell Receptor Signaling Pathway (GO:0050852)	3/95	0.000776369	0.0112236	PTPRC; CTLA4; HLA-DRB1
Positive Regulation Of Protein-Containing Complex Assembly (GO:0031334)	3/98	0.000849767	0.0120233	GBP5; CD36; CLU
Amyloid Fibril Formation (GO:1990000)	2/24	0.0009449	0.0130908	CD36; CAMP
Positive Regulation Of T Cell Activation (GO:0050870)	3/107	0.00109598	0.014874	HLA-DRB5; PTPRC; HLA-DRB1
Positive Regulation Of DNA-binding Transcription Factor Activity (GO:0051091)	4/246	0.00118707	0.0153124	LPAR5; CD36; CLU; S100A8
Positive Regulation Of Nitric Oxide Biosynthetic Process (GO:0045429)	2/27	0.00119736	0.0153124	CD36; CLU
Regulation Of Peptidase Activity (GO:0052547)	2/27	0.00119736	0.0153124	CTSL; CST7
Positive Regulation Of Nitric Oxide Metabolic Process (GO:1904407)	2/28	0.00128792	0.0158605	CD36; CLU
Mucosal Immune Response (GO:0002385)	2/28	0.00128792	0.0158605	H2BC11; CAMP
Integrated Stress Response Signaling (GO:0140467)	2/29	0.00138167	0.0167056	NFE2; MAF
Regulation Of Protein-Containing Complex Assembly (GO:0043254)	3/119	0.00148843	0.0176752	SELP; CD36; CLU
Regulation Of Response To Biotic Stimulus (GO:0002831)	2/31	0.00157867	0.0184178	CGAS; CD36
Positive Regulation Of Defense Response (GO:0031349)	3/124	0.00167481	0.0192026	GBP5; TLR8; S100A8
Positive Regulation Of T Cell Mediated Cytotoxicity (GO:0001916)	2/33	0.00178827	0.01982	HLA-DRB1; MICB
Regulation Of NLRP3 Inflammasome Complex Assembly (GO:1900225)	2/33	0.00178827	0.01982	GBP5; CD36
Antigen Receptor-Mediated Signaling Pathway (GO:0050851)	3/134	0.00208998	0.0227842	PTPRC; CTLA4; HLA-DRB1
Negative Regulation Of Sequestering Of Calcium Ion (GO:0051283)	2/36	0.00212609	0.022804	PTPRC; CLU
Positive Regulation Of Immune Effector Process (GO:0002699)	2/37	0.00224489	0.0233258	PTPRC; HLA-DRB1
Regulation Of Defense Response To Virus By Host (GO:0050691)	2/37	0.00224489	0.0233258	CGAS; MICB
Negative Regulation Of Lymphocyte Proliferation (GO:0050672)	2/39	0.00249173	0.0247313	CTLA4; HLA-DRB1
Regulation Of Nitric Oxide Biosynthetic Process (GO:0045428)	2/39	0.00249173	0.0247313	CD36; CLU
Release Of Sequestered Calcium Ion Into Cytosol (GO:0051209)	2/39	0.00249173	0.0247313	PTPRC; CLU
Cyclic-Nucleotide-Mediated Signaling (GO:0019935)	2/40	0.00261974	0.0256195	CGAS; CD36
Positive Regulation Of Response To Biotic Stimulus (GO:0002833)	2/41	0.00275079	0.0265113	GBP5; TLR8
Positive Regulation Of NF-kappaB Transcription Factor Activity (GO:0051092)	3/152	0.00298764	0.0273092	CD36; CLU; S100A8
Positive Regulation Of Intracellular Signal Transduction (GO:1902533)	5/525	0.00300162	0.0273092	SELP; PTPRC; TRAT1; HLA-DRB1; S100A8
Positive Regulation Of T Cell Mediated Immunity (GO:0002711)	2/43	0.00302199	0.0273092	HLA-DRB1; MICB
Positive Regulation Of Cytokine Production (GO:0001819)	4/320	0.00309237	0.0273092	GBP5; PTPRC; TLR8; CGAS
Positive Regulation Of Response To External Stimulus (GO:0032103)	3/155	0.00315691	0.0273092	GBP5; TLR8; S100A8
Positive Regulation Of Leukocyte Cell-Cell Adhesion (GO:1903039)	2/44	0.00316212	0.0273092	HLA-DRB5; HLA-DRB1
Regulation Of B Cell Proliferation (GO:0030888)	2/44	0.00316212	0.0273092	PTPRC; CTLA4
Positive Regulation Of Biosynthetic Process (GO:0009891)	2/44	0.00316212	0.0273092	CXCL8; CD36
Positive Regulation Of Innate Immune Response (GO:0045089)	2/45	0.00330524	0.0281793	GBP5; TLR8
Response To Lipopolysaccharide (GO:0032496)	3/159	0.00339162	0.0285497	SELP; CXCL8; S100A8
B Cell Receptor Signaling Pathway (GO:0050853)	2/46	0.00345136	0.0286894	PTPRC; CTLA4
Positive Regulation Of Lymphocyte Activation (GO:0051251)	2/47	0.00360044	0.0295592	HLA-DRB5; HLA-DRB1
Cellular Defense Response (GO:0006968)	2/48	0.0037525	0.0304319	TRAT1; CXCR2
Positive Regulation Of Leukocyte Mediated Cytotoxicity (GO:0001912)	2/51	0.00422636	0.0334586	HLA-DRB1; MICB
Cholesterol Transport (GO:0030301)	2/51	0.00422636	0.0334586	CD36; CLU
Positive Regulation Of Cellular Biosynthetic Process (GO:0031328)	3/174	0.00436608	0.0339472	CXCL8; CD36; CLU
Negative Regulation Of Innate Immune Response (GO:0045824)	2/52	0.00439016	0.0339472	SLAMF8; CGAS
Protein Homotetramerization (GO:0051289)	2/53	0.00455689	0.0348314	GBP5; CLU
Negative Regulation Of Cytokine Production (GO:0001818)	3/178	0.00465171	0.0351521	PTPRC; TLR8; HLA-DRB1
Positive Regulation Of ERK1 And ERK2 Cascade (GO:0070374)	3/179	0.00472485	0.0353036	PTPRC; CD36; HLA-DRB1
Pattern Recognition Receptor Signaling Pathway (GO:0002221)	2/56	0.0050744	0.0370821	TLR8; CGAS
Positive Regulation Of Cellular Metabolic Process (GO:0031325)	2/56	0.0050744	0.0370821	CXCL8; CGAS
Negative Regulation Of Cytokine-Mediated Signaling Pathway (GO:0001960)	2/59	0.00561771	0.0406063	PTPRC; H2BC11
Regulation Of T Cell Activation (GO:0050863)	2/62	0.00618653	0.044237	HLA-DRB5; HLA-DRB1
Positive Regulation Of Type I Interferon Production (GO:0032481)	2/64	0.00657976	0.0465483	TLR8; CGAS
Negative Regulation Of Immune Response (GO:0050777)	2/66	0.00698412	0.0488888	CGAS; HLA-DRB1

## Sheet: CLUp Enriched CCs
Supplementary Table S3. Enriched Cellular Components for CLUp DEGs
Term	Overlap	p-value	q-value	Genes
Endocytic Vesicle (GO:0030139)	7/196	7.6089e-08	7.38063e-06	CD163; HLA-DRB5; ITGB5; CTSL; CTLA4; CD36; HLA-DRB1
Cytoplasmic Vesicle Membrane (GO:0030659)	8/389	5.59463e-07	2.7134e-05	CD163; HLA-DRB5; PTPRC; CXCR2; TLR8; CD36; CLU; HLA-DRB1
Platelet Alpha Granule Membrane (GO:0031092)	3/16	3.48341e-06	0.00011263	SELP; ITGA2B; CD36
Secretory Granule Membrane (GO:0030667)	6/279	1.32489e-05	0.000321287	SELP; PTPRC; ITGA2B; CXCR2; CD36; CLU
Platelet Alpha Granule (GO:0031091)	4/89	2.40883e-05	0.000467313	SELP; ITGA2B; CD36; CLU
Collagen-Containing Extracellular Matrix (GO:0062023)	6/373	6.7373e-05	0.0010892	COL18A1; CTSL; S100A6; ANG; CLU; S100A8
Bounding Membrane Of Organelle (GO:0098588)	8/819	0.000125247	0.00173557	GBP5; CD163; HLA-DRB5; PTPRC; CXCR2; TLR8; CD36; HLA-DRB1
Endocytic Vesicle Membrane (GO:0030666)	4/159	0.000229987	0.0027886	CD163; HLA-DRB5; CD36; HLA-DRB1
Lysosome (GO:0005764)	6/503	0.00034219	0.00352468	HLA-DRB5; CTSL; CXCR2; CST7; CLU; HLA-DRB1
MHC Class II Protein Complex (GO:0042613)	2/15	0.000363369	0.00352468	HLA-DRB5; HLA-DRB1
Clathrin-Coated Endocytic Vesicle (GO:0045334)	3/85	0.000561293	0.00486789	HLA-DRB5; CTLA4; HLA-DRB1
Late Endosome (GO:0005770)	4/205	0.000602214	0.00486789	HLA-DRB5; CTSL; CST7; HLA-DRB1
MHC Protein Complex (GO:0042611)	2/21	0.000721533	0.00538375	HLA-DRB5; HLA-DRB1
Lumenal Side Of Endoplasmic Reticulum Membrane (GO:0098553)	2/27	0.00119736	0.00829599	HLA-DRB5; HLA-DRB1
Endolysosome (GO:0036019)	2/28	0.00128792	0.00832855	CTSL; TLR8
Specific Granule (GO:0042581)	3/159	0.00339162	0.0205617	CD36; CLU; CAMP
Multivesicular Body (GO:0005771)	2/50	0.00406547	0.0231971	CTSL; CST7
Lysosomal Membrane (GO:0005765)	4/356	0.00452042	0.0237602	HLA-DRB5; TLR8; CLU; HLA-DRB1
ER To Golgi Transport Vesicle Membrane (GO:0012507)	2/55	0.00489901	0.0237602	HLA-DRB5; HLA-DRB1
Coated Vesicle Membrane (GO:0030662)	2/55	0.00489901	0.0237602	HLA-DRB5; HLA-DRB1
Transport Vesicle Membrane (GO:0030658)	2/60	0.0058045	0.0268112	HLA-DRB5; HLA-DRB1
Spindle (GO:0005819)	3/210	0.00734616	0.0312066	CBX3; TRAT1; CXCR2
Clathrin-Coated Endocytic Vesicle Membrane (GO:0030669)	2/68	0.00739951	0.0312066	HLA-DRB5; HLA-DRB1
Golgi Membrane (GO:0000139)	4/427	0.00852457	0.0335877	GBP5; HLA-DRB5; TLR8; HLA-DRB1
Lytic Vacuole (GO:0000323)	3/223	0.00865661	0.0335877	CTSL; CST7; CLU
COPII-coated ER To Golgi Transport Vesicle (GO:0030134)	2/76	0.00916971	0.0340032	HLA-DRB5; HLA-DRB1
Platelet Dense Granule Membrane (GO:0031088)	1/5	0.00946481	0.0340032	SELP
Intermediate Filament Cytoskeleton (GO:0045111)	2/81	0.0103626	0.0357398	HLA-DRB1; S100A8
trans-Golgi Network (GO:0005802)	3/241	0.0106851	0.0357398	HLA-DRB5; DPY30; HLA-DRB1
Late Endosome Membrane (GO:0031902)	2/85	0.0113639	0.0367433	HLA-DRB5; HLA-DRB1
Specific Granule Membrane (GO:0035579)	2/90	0.012673	0.0384151	CD36; CLU
Clathrin-Coated Vesicle Membrane (GO:0030665)	2/90	0.012673	0.0384151	HLA-DRB5; HLA-DRB1
Spherical High-Density Lipoprotein Particle (GO:0034366)	1/7	0.0132263	0.0388773	CLU
Phagocytic Vesicle (GO:0045335)	2/100	0.0154783	0.042897	ITGB5; CD36
trans-Golgi Network Membrane (GO:0032588)	2/100	0.0154783	0.042897	HLA-DRB5; HLA-DRB1
Condensed Chromosome, Centromeric Region (GO:0000779)	1/9	0.0169738	0.0446619	CBX3
Lytic Vacuole Membrane (GO:0098852)	3/287	0.017036	0.0446619	HLA-DRB5; CLU; HLA-DRB1
