# Supplementary material for: In Silico Analysis Highlights Potential Predictive Indicators Associated with Secondary Progressive Multiple Sclerosis
Source: Int J Mol Sci. 2024 Mar 16;25(6):3374. doi: 10.3390/ijms25063374 (PMC10970138; doi:10.3390/ijms25063374)
Supplement: Supplementary file 1 [file ijms-25-03374-s001.zip › Supplementary Table S4.xlsx]

## Sheet: GSE17048
Gene	FC	q.Value	p.Value	Direction
HLA-DRB5	4.3554	7.75e-43	2.05e-47	1
HLA-DRB1	2.68601	9.2e-35	4.87e-39	1
LOC654194	1.55715	9.27e-18	7.35e-22	1
SNORD13	1.76429	1.45e-17	1.53e-21	1
RPL21	1.5674	3.43e-16	4.53e-20	1
IFI44L	1.54536	9.15e-15	1.45e-18	1
LOC642989	1.57555	3.13e-14	6.62e-18	1
RPL26	1.54727	3.22e-14	7.67e-18	1
RPL39	1.54464	3.4e-14	6.29e-18	1
NDUFA1	1.64745	4.32e-14	1.14e-17	1
HIST1H4C	1.64177	7.9e-14	2.51e-17	1
LOC653658	1.50693	8.39e-14	2.44e-17	1
TOMM7	1.4758	2.38e-12	8.18e-16	1
LOC731640	1.41643	2.8e-12	1.04e-15	1
XIST	1.35355	6.35e-12	2.52e-15	1
LOC648622	1.41403	8.86e-12	3.99e-15	1
IGJ	1.41945	9.18e-12	3.89e-15	1
SNRPD2	1.50534	1.27e-11	6.03e-15	1
LOC650646	1.29016	1.52e-11	7.65e-15	1
RPS26L1	1.30531	1.57e-11	8.31e-15	1
GZMH	1.38007	2.65e-11	1.54e-14	1
PPP3R1	1.51953	2.71e-11	1.5e-14	1
RPS26L	1.25881	2.85e-11	1.73e-14	1
LOC651436	1.35007	2.93e-11	1.94e-14	1
HBE1	1.14639	3e-11	1.9e-14	1
RPL36AL	1.53846	6.36e-11	4.55e-14	1
RPL41	1.43906	6.56e-11	4.51e-14	1
UQCRQ	1.40076	7.17e-11	5.5e-14	1
LOC646200	1.51653	7.2e-11	6.1e-14	1
RPS24	1.36333	7.27e-11	5.96e-14	1
LOC650276	1.37325	7.31e-11	5.42e-14	1
IFI44	1.43472	7.46e-11	5.92e-14	1
IFIT1	1.37024	7.71e-11	6.73e-14	1
ATP5O	1.48412	8.11e-11	7.29e-14	1
RPS17	1.41423	8.56e-11	7.93e-14	1
LOC388621	1.33636	9.05e-11	8.61e-14	1
LOC388532	1.36036	1.19e-10	1.16e-13	1
RSAD2	1.37212	1.28e-10	1.28e-13	1
RPS3A	1.23244	1.59e-10	1.64e-13	1
IFI27	1.34844	1.61e-10	1.7e-13	1
IGLL1	1.39082	1.84e-10	2.05e-13	1
LOC402057	1.3795	1.87e-10	2.03e-13	1
DEFA3	1.15727	1.9e-10	2.16e-13	1
LOC647361	1.43123	1.95e-10	2.27e-13	1
MYOM2	1.09709	2.03e-10	2.42e-13	1
NDUFS5	1.48214	2.42e-10	2.95e-13	1
FCER1A	1.44718	2.53e-10	3.21e-13	1
RPS27	1.42694	2.54e-10	3.16e-13	1
LOC728358	1.14837	2.72e-10	3.52e-13	1
RPS15A	1.35446	2.81e-10	3.71e-13	1
ORM1	1.3837	4.51e-10	6.32e-13	1
IRF5	1.50989	4.51e-10	6.44e-13	1
LOC441377	1.16266	4.56e-10	6.27e-13	1
RPL27	1.40272	4.6e-10	6.21e-13	1
LOC643284	1.3947	4.86e-10	7.07e-13	1
LOC644934	1.20135	5.15e-10	7.62e-13	1
RPS26	1.22234	5.18e-10	7.8e-13	1
LOC648000	1.30993	5.49e-10	8.43e-13	1
RPL17	1.33636	6.34e-10	9.89e-13	1
HINT1	1.353	7.14e-10	1.13e-12	1
RPL9	1.28932	8.9e-10	1.44e-12	1
COX7C	1.33049	9.15e-10	1.5e-12	1
LOC642250	1.31562	9.43e-10	1.57e-12	1
C13ORF27	1.3624	9.9e-10	1.68e-12	1
LOC442454	1.40193	1.03e-09	1.76e-12	1
RPL23	1.24471	1.19e-09	2.07e-12	1
RPS20	1.40984	1.24e-09	2.2e-12	1
COX7A2	1.3519	1.29e-09	2.32e-12	1
LOC440567	1.42389	1.3e-09	2.38e-12	1
RPS25	1.46735	1.48e-09	2.77e-12	1
UQCRH	1.4518	1.59e-09	3.03e-12	1
LOC388588	1.08932	2.09e-09	4.04e-12	1
LOC391656	1.26295	2.21e-09	4.32e-12	1
RPS10	1.41543	2.27e-09	4.56e-12	1
CLC	1.30157	2.3e-09	4.56e-12	1
LOC653600	1.11794	2.32e-09	4.72e-12	1
LOC401206	1.46135	2.51e-09	5.18e-12	1
LOC100008589	1.41203	2.85e-09	5.95e-12	1
KLRB1	1.35172	2.9e-09	6.13e-12	1
ARL17P1	1.31579	3.41e-09	7.3e-12	1
S100A12	1.19804	4.28e-09	9.27e-12	1
LOC441246	1.37438	4.85e-09	1.07e-11	1
DEFA1	1.12461	4.98e-09	1.11e-11	1
RNASE2	1.35245	5.6e-09	1.26e-11	1
LOC651202	1.36147	5.64e-09	1.28e-11	1
HERC5	1.32031	7.1e-09	1.63e-11	1
ATP5I	1.4247	7.21e-09	1.7e-11	1
RPL31	1.21168	7.29e-09	1.7e-11	1
PTPLAD2	1.27796	8.85e-09	2.11e-11	1
CD3D	1.41323	9.55e-09	2.3e-11	1
HSP90AA1	1.34862	9.77e-09	2.38e-11	1
DEFA4	1.23916	1.1e-08	2.71e-11	1
S100P	1.17357	1.1e-08	2.74e-11	1
LOC731365	1.3624	1.11e-08	2.79e-11	1
HDC	1.2773	1.12e-08	2.85e-11	1
MRPL51	1.43308	1.2e-08	3.09e-11	1
LOC644642	1.28008	1.29e-08	3.34e-11	1
ANXA1	1.35501	1.29e-08	3.38e-11	1
LOC646766	1.34716	1.29e-08	3.41e-11	1
SNRPG	1.3217	1.64e-08	4.37e-11	1
LOC652493	1.27453	1.71e-08	4.61e-11	1
RPL30	1.37552	2.08e-08	5.68e-11	1
SNHG5	1.3421	2.1e-08	5.77e-11	1
RPL35	1.32926	2.24e-08	6.23e-11	1
LDHB	1.34246	2.26e-08	6.34e-11	1
ELA2	1.32188	2.5e-08	7.07e-11	1
IFIT3	1.31268	2.86e-08	8.17e-11	1
NDUFA4	1.23335	3.06e-08	8.84e-11	1
EPSTI1	1.24642	3.2e-08	9.31e-11	1
ISG15	1.31475	3.27e-08	9.61e-11	1
LOC440737	1.30941	3.93e-08	1.17e-10	1
ALS2CR14	1.29668	4.55e-08	1.36e-10	1
LY6E	1.31822	4.62e-08	1.39e-10	1
RN7SK	1.44886	5.48e-08	1.67e-10	1
HLA-C	1.28833	7.01e-08	2.15e-10	1
MX1	1.26534	7.6e-08	2.35e-10	1
TXN	1.33565	7.73e-08	2.41e-10	1
RPS18	1.29938	7.92e-08	2.49e-10	1
SHFM1	1.41363	8.03e-08	2.55e-10	1
RNASE3	1.29467	8.3e-08	2.66e-10	1
RPS27A	1.38332	8.41e-08	2.74e-10	1
ZNF683	1.21242	8.43e-08	2.72e-10	1
LOC653773	1.17454	8.66e-08	2.84e-10	1
S100A8	1.32118	8.98e-08	2.97e-10	1
RPL24	1.36184	1.07e-07	3.6e-10	1
FLJ40722	1.18287	1.08e-07	3.58e-10	1
LOC440055	1.33601	1.16e-07	3.94e-10	1
IFITM3	1.1207	1.17e-07	3.98e-10	1
CAMK1G	1.14299	1.2e-07	4.14e-10	1
RPS29	1.35556	1.57e-07	5.43e-10	1
LOC647450	1.22264	1.76e-07	6.25e-10	1
TIMM10	1.3708	1.77e-07	6.21e-10	1
BMP8B	1.24766	1.77e-07	6.19e-10	1
CAMP	1.239	1.89e-07	6.75e-10	1
C17ORF61	1.29752	2e-07	7.2e-10	1
ERAF	1.13947	2.65e-07	9.61e-10	1
RPL7	1.26743	2.7e-07	9.84e-10	1
RPS14	1.3587	2.79e-07	1.03e-09	1
RPA3	1.34716	3.44e-07	1.28e-09	1
PI3	1.16496	3.57e-07	1.34e-09	1
FAM153B	1.30497	3.75e-07	1.43e-09	1
LOC441763	1.34499	3.76e-07	1.42e-09	1
PFDN5	1.21788	3.93e-07	1.51e-09	1
EIF3E	1.29299	4.73e-07	1.84e-09	1
LOC651751	1.21921	4.79e-07	1.87e-09	1
DBI	1.31044	4.89e-07	1.93e-09	1
C9ORF130	1.22234	5.04e-07	2e-09	1
LOC642113	1.15848	5.05e-07	2.02e-09	1
NDUFB2	1.30976	6.28e-07	2.52e-09	1
EIF2AK2	1.29216	6.69e-07	2.71e-09	1
GTF2H5	1.36166	6.98e-07	2.84e-09	1
HSPE1	1.36351	7.24e-07	2.97e-09	1
DKFZP434K191	1.25897	7.3e-07	3.01e-09	1
CFD	1.146	7.94e-07	3.3e-09	1
ZNF223	1.22115	8.76e-07	3.68e-09	1
EVI5	1.2276	8.94e-07	3.78e-09	1
CD52	1.22309	9.88e-07	4.21e-09	1
GZMA	1.25031	1.06e-06	4.53e-09	1
C15ORF15	1.15915	1.16e-06	5e-09	1
HS.524705	1.13494	1.16e-06	5.05e-09	1
LOC388720	1.34753	1.25e-06	5.46e-09	1
CTSG	1.27	1.26e-06	5.54e-09	1
NDUFB3	1.25188	1.34e-06	5.94e-09	1
NLRP8	1.30446	1.39e-06	6.16e-09	1
CTSZ	1.28783	1.59e-06	7.1e-09	1
NDUFS4	1.30941	1.79e-06	8.09e-09	1
LOC647340	1.21139	1.79e-06	8.06e-09	1
HBD	1.0395	1.83e-06	8.33e-09	1
ERH	1.31389	1.97e-06	9e-09	1
HS.347034	1.3611	2e-06	9.27e-09	1
MYL6	1.27016	2e-06	9.22e-09	1
TMCO1	1.25188	2.03e-06	9.47e-09	1
ATP5F1	1.29904	2.04e-06	9.56e-09	1
LOC650518	1.22145	2.07e-06	9.79e-09	1
MGC29506	1.31372	2.07e-06	9.76e-09	1
EEF1B2	1.28107	2.1e-06	9.98e-09	1
DNAJA1	1.31631	2.16e-06	1.03e-08	1
LOC646483	1.32556	2.24e-06	1.08e-08	1
RPS4X	1.36724	2.36e-06	1.14e-08	1
PSMA6	1.22399	2.56e-06	1.25e-08	1
FAU	1.31978	2.64e-06	1.29e-08	1
LOC341457	1.32732	2.76e-06	1.36e-08	1
ATP5J	1.33103	2.99e-06	1.48e-08	1
CCDC52	1.07204	3.05e-06	1.52e-08	1
XAF1	1.27535	3.06e-06	1.53e-08	1
TXNDC17	1.24177	3.44e-06	1.73e-08	1
LOC644250	1.18343	3.45e-06	1.75e-08	1
LOC285900	1.30873	4.08e-06	2.08e-08	1
HS.544245	1.07066	4.34e-06	2.23e-08	1
GZMK	1.2335	4.56e-06	2.35e-08	1
TXNDC5	1.29668	4.89e-06	2.55e-08	1
SLC5A8	1.21344	4.89e-06	2.54e-08	1
LOC346950	1.29132	4.9e-06	2.57e-08	1
SLC4A5	1.25345	5.06e-06	2.66e-08	1
C4BPA	1.16959	5.07e-06	2.68e-08	1
KRT72	1.23778	5.07e-06	2.7e-08	1
OAS3	1.24254	5.15e-06	2.75e-08	1
LOC644863	1.32275	5.16e-06	2.77e-08	1
COMMD6	1.19104	5.41e-06	2.95e-08	1
LOC645284	1.0287	5.42e-06	2.94e-08	1
PRDX1	1.32433	5.43e-06	2.93e-08	1
ANKDD1A	1.287	5.45e-06	2.99e-08	1
RPL11	1.29483	5.68e-06	3.14e-08	1
C20ORF52	1.31389	5.71e-06	3.14e-08	1
TNFAIP6	1.26119	5.99e-06	3.33e-08	1
HS.143018	1.31666	6.08e-06	3.4e-08	1
LCN2	1.12701	6.65e-06	3.73e-08	1
SRP14	1.31096	6.7e-06	3.78e-08	1
CEP27	1.2133	7.13e-06	4.04e-08	1
ENY2	1.26167	7.54e-06	4.29e-08	1
HS.553301	1.22294	7.58e-06	4.33e-08	1
CEACAM8	1.11458	7.7e-06	4.42e-08	1
LOC649548	1.26678	7.88e-06	4.55e-08	1
CIP29	1.29904	8.08e-06	4.68e-08	1
TINP1	1.29232	8.15e-06	4.74e-08	1
GZMB	1.17744	8.2e-06	4.81e-08	1
FOLR3	1.03595	8.2e-06	4.79e-08	1
COX17	1.32398	8.41e-06	4.96e-08	1
LOC654121	1.32908	8.91e-06	5.28e-08	1
CD3G	1.25047	9.29e-06	5.53e-08	1
SRP14P1	1.27665	9.41e-06	5.62e-08	1
LOC647834	1.21374	9.42e-06	5.66e-08	1
LOC728973	1.1919	9.42e-06	5.68e-08	1
LOC643011	1.20584	9.62e-06	5.83e-08	1
CD8A	1.24069	1e-05	6.1e-08	1
MCM8	1.2282	1.05e-05	6.43e-08	1
RPS13	1.29955	1.09e-05	6.73e-08	1
PSMC2	1.287	1.09e-05	6.71e-08	1
LOC731985	1.28337	1.16e-05	7.18e-08	1
LOC644511	1.3132	1.3e-05	8.1e-08	1
IL10	1.20496	1.31e-05	8.16e-08	1
DTWD2	1.15128	1.32e-05	8.25e-08	1
CD3E	1.21862	1.32e-05	8.28e-08	1
LOC650557	1.30804	1.32e-05	8.36e-08	1
MDH1	1.29132	1.33e-05	8.49e-08	1
HLA-DQA1	1.22474	1.33e-05	8.47e-08	1
SSTR2	1.14051	1.34e-05	8.58e-08	1
MS4A6A	1.28436	1.36e-05	8.71e-08	1
C14ORF156	1.26167	1.38e-05	8.88e-08	1
LOC653505	1.2987	1.47e-05	9.54e-08	1
HS.452445	1.24688	1.47e-05	9.54e-08	1
FLJ37396	1.21462	1.56e-05	1.02e-07	1
LOC652694	1.18708	1.56e-05	1.02e-07	1
PSMA4	1.25094	1.57e-05	1.04e-07	1
CPA3	1.28189	1.59e-05	1.05e-07	1
ZADH1	1.17371	1.59e-05	1.05e-07	1
ERAP2	1.00231	1.66e-05	1.11e-07	1
PARK7	1.31718	1.68e-05	1.13e-07	1
HS.193767	1.25439	1.71e-05	1.15e-07	1
RPL6	1.28634	1.75e-05	1.19e-07	1
LOC729008	1.276	1.76e-05	1.19e-07	1
LOC220433	1.18483	1.79e-05	1.22e-07	1
LOC642210	1.33067	1.85e-05	1.27e-07	1
TCN1	1.26263	1.85e-05	1.27e-07	1
C22ORF34	1.30685	1.9e-05	1.3e-07	1
HS.562039	1.22519	1.93e-05	1.34e-07	1
SOD1	1.28271	2.09e-05	1.45e-07	1
LRRN3	1.13033	2.22e-05	1.54e-07	1
RPL5	1.2216	2.34e-05	1.64e-07	1
C6ORF170	1.21168	2.35e-05	1.64e-07	1
HS.572130	1.25298	2.42e-05	1.71e-07	1
C22ORF30	1.04297	2.54e-05	1.8e-07	1
SS18L2	1.24425	2.56e-05	1.82e-07	1
MMP9	1.10059	2.6e-05	1.86e-07	1
RPS21	1.29416	2.6e-05	1.87e-07	1
LOC388344	1.12309	2.75e-05	1.98e-07	1
ATP6V1D	1.25047	2.77e-05	2e-07	1
GIMAP7	1.27584	2.77e-05	2.01e-07	1
MRPL33	1.30073	2.87e-05	2.09e-07	1
LSM5	1.27453	2.9e-05	2.13e-07	1
IL17RD	1.14325	2.9e-05	2.12e-07	1
RPL4	1.27567	2.92e-05	2.15e-07	1
C11ORF10	1.29904	2.95e-05	2.18e-07	1
LOC653489	1.2108	3.06e-05	2.27e-07	1
LOC389787	1.0502	3.06e-05	2.27e-07	1
MCART1	1.25408	3.08e-05	2.3e-07	1
GNL2	1.29082	3.09e-05	2.31e-07	1
LOC645018	1.16401	3.12e-05	2.35e-07	1
ATP5C1	1.17426	3.18e-05	2.4e-07	1
MFSD11	1.16401	3.28e-05	2.49e-07	1
HS.579530	1.28584	3.29e-05	2.49e-07	1
HS.572649	1.23701	3.47e-05	2.65e-07	1
PCDHB9	1.20671	3.62e-05	2.76e-07	1
CEBPZ	1.22609	3.68e-05	2.83e-07	1
LOC643882	1.18977	3.73e-05	2.87e-07	1
CXORF26	1.27372	3.85e-05	2.97e-07	1
LOC729466	1.25534	3.85e-05	2.99e-07	1
LOC134997	1.22775	3.96e-05	3.09e-07	1
LOC650298	1.19076	4.01e-05	3.14e-07	1
TMEM176A	1.07021	4.23e-05	3.32e-07	1
TMED4	1.28254	4.24e-05	3.34e-07	1
GMFG	1.20236	4.25e-05	3.36e-07	1
HS.534061	1.12625	4.37e-05	3.46e-07	1
METAP2	1.25172	4.45e-05	3.55e-07	1
LOC441268	1.27243	4.48e-05	3.58e-07	1
TMEM156	1.20163	4.56e-05	3.66e-07	1
LOC649923	1.15194	4.63e-05	3.75e-07	1
ZNF682	1.19104	4.64e-05	3.74e-07	1
TAF15	1.2809	4.64e-05	3.74e-07	1
STAG3L2	1.25739	4.9e-05	4e-07	1
RAXL1	1.19119	4.91e-05	3.99e-07	1
C12ORF57	1.25282	4.92e-05	4.02e-07	1
AIF1	1.25031	4.93e-05	4.05e-07	1
NDUFS3	1.28634	5.2e-05	4.27e-07	1
HS.544988	1.06576	5.24e-05	4.33e-07	1
MRPS22	1.27113	5.52e-05	4.57e-07	1
FAM40B	1.2133	5.65e-05	4.69e-07	1
DNAJC8	1.27502	5.68e-05	4.74e-07	1
LOC649841	1.16632	5.84e-05	4.88e-07	1
DUSP8	1.29433	5.9e-05	4.95e-07	1
CISD1	1.24953	6e-05	5.05e-07	1
LOC645683	1.27665	6.01e-05	5.07e-07	1
FLJ38717	1.24332	6.25e-05	5.29e-07	1
SNAPC1	1.2387	6.38e-05	5.42e-07	1
ARG1	1.21036	6.41e-05	5.5e-07	1
TMEM137	1.22414	6.43e-05	5.49e-07	1
RPL35A	1.25676	6.43e-05	5.48e-07	1
FCER1G	1.29299	6.57e-05	5.65e-07	1
ICA1	1.23062	6.62e-05	5.71e-07	1
NME1	1.2987	6.95e-05	6.01e-07	1
HES4	1.20337	7.04e-05	6.11e-07	1
LOC653316	1.24131	7.08e-05	6.16e-07	1
CTSW	1.23092	7.24e-05	6.32e-07	1
ALPP	1.21021	7.73e-05	6.77e-07	1
RPL32	1.24813	7.75e-05	6.8e-07	1
COMMD3	1.24517	8.06e-05	7.1e-07	1
C14ORF112	1.25913	8.23e-05	7.28e-07	1
BXDC1	1.26422	8.36e-05	7.41e-07	1
RPLP0	1.2012	8.45e-05	7.51e-07	1
C6ORF160	1.19717	8.47e-05	7.55e-07	1
NPCDR1	1.22865	8.85e-05	7.91e-07	1
CMTM2	1.19062	9.14e-05	8.22e-07	1
KLHL28	1.25644	9.16e-05	8.21e-07	1
LOC649946	1.13007	9.19e-05	8.34e-07	1
C7ORF54	1.25094	9.2e-05	8.37e-07	1
IFI6	1.17897	9.2e-05	8.33e-07	1
FAM73A	1.16333	9.52e-05	8.71e-07	1
RPS5	1.25802	9.52e-05	8.69e-07	1
BOLA2	1.28485	9.68e-05	8.88e-07	1
EEF1G	1.2282	9.97e-05	9.18e-07	1
LOC90586	1.14811	0.0001005	9.28e-07	1
LOC283412	1.25455	0.0001023	9.47e-07	1
BLZF1	1.13456	0.000104	9.66e-07	1
LOC284821	1.27226	0.000104	9.68e-07	1
ATP5L	1.25897	0.0001087	1.02e-06	1
CCR7	1.17481	0.0001144	1.07e-06	1
MRP63	1.15088	0.0001166	1.1e-06	1
RPS6	1.25251	0.0001167	1.1e-06	1
FRG1	1.19546	0.0001169	1.1e-06	1
NQO2	1.16836	0.000122	1.16e-06	1
RNASE6	1.19389	0.0001224	1.16e-06	1
ZNF641	1.21981	0.0001251	1.19e-06	1
HS.22689	1.26904	0.0001258	1.2e-06	1
SLPI	1.19703	0.0001268	1.22e-06	1
C19ORF59	1.16252	0.0001269	1.22e-06	1
HS.549989	1.28717	0.0001281	1.23e-06	1
HS.562875	1.16523	0.0001289	1.25e-06	1
AHR	1.22926	0.0001296	1.26e-06	1
EMG1	1.26904	0.00013	1.27e-06	1
PSMB1	1.24533	0.0001302	1.26e-06	1
CLEC2D	1.23732	0.0001309	1.28e-06	1
SLC45A3	1.2486	0.0001332	1.31e-06	1
RPS27L	1.20788	0.0001335	1.31e-06	1
LSM3	1.23335	0.0001337	1.32e-06	1
KIAA0492	1.2038	0.0001392	1.37e-06	1
FAM21A	1.22714	0.0001419	1.4e-06	1
PTPRCAP	1.23808	0.0001438	1.43e-06	1
HS.576072	1.21892	0.0001443	1.44e-06	1
PCYOX1	1.18497	0.0001469	1.47e-06	1
RBX1	1.14142	0.0001481	1.48e-06	1
C17ORF45	1.19005	0.0001482	1.49e-06	1
LOC645688	1.27065	0.0001563	1.58e-06	1
SCARNA9	1.2054	0.0001564	1.58e-06	1
LOC441775	1.17523	0.0001566	1.59e-06	1
HS.545615	1.21271	0.0001573	1.6e-06	1
ITM2A	1.24564	0.0001574	1.6e-06	1
IKZF3	1.21095	0.0001584	1.62e-06	1
ADRA2C	1.0305	0.0001617	1.66e-06	1
BCYRN1	1.17536	0.0001695	1.74e-06	1
FCGR1B	1.20366	0.0001697	1.74e-06	1
PTMA	1.02145	0.0001705	1.76e-06	1
CBX6	1.23244	0.0001802	1.86e-06	1
LOC653158	1.23671	0.0001802	1.87e-06	1
LOC648852	1.14025	0.0001915	2e-06	1
RWDD1	1.21374	0.0001915	2e-06	1
GPR1	1.1422	0.0001919	2e-06	1
LGALS1	1.24008	0.0001949	2.04e-06	1
TAOK1	1.15115	0.0001975	2.07e-06	1
PNN	1.19218	0.0002002	2.11e-06	1
CCDC53	1.22594	0.0002005	2.12e-06	1
PIP5K2B	1.22429	0.0002022	2.14e-06	1
MRPL36	1.26199	0.0002164	2.3e-06	1
KCTD7	1.1805	0.0002174	2.31e-06	1
SEC11A	1.24471	0.0002176	2.32e-06	1
LOC653157	1.2285	0.0002197	2.35e-06	1
EPC1	1.27016	0.0002252	2.41e-06	1
NUBPL	1.20817	0.0002254	2.43e-06	1
HCG2P7	1.18497	0.0002255	2.42e-06	1
GZMM	1.24008	0.0002272	2.45e-06	1
IGFBP1	1.1325	0.0002296	2.49e-06	1
KIAA0748	1.2273	0.000234	2.55e-06	1
ANKRD30B	1.2054	0.0002341	2.55e-06	1
DMC1	1.16863	0.0002343	2.56e-06	1
MGC12760	1.14679	0.000243	2.66e-06	1
LOC158345	1.20598	0.0002489	2.73e-06	1
DPM1	1.22549	0.0002582	2.85e-06	1
MRPL50	1.21315	0.0002586	2.85e-06	1
PLA2G2D	1.21315	0.0002607	2.88e-06	1
LOC642161	1.25329	0.0002631	2.92e-06	1
HS.443185	1.23839	0.0002661	2.96e-06	1
GDPD5	1.2475	0.0002678	2.98e-06	1
LOC644297	1.2213	0.0002807	3.13e-06	1
PSMA3	1.24471	0.0002852	3.19e-06	1
FCGR1A	1.22926	0.0002867	3.22e-06	1
VIPR1	1.23609	0.0002933	3.3e-06	1
CCDC72	1.14312	0.0002942	3.32e-06	1
LOC728499	1.20019	0.0002964	3.35e-06	1
HS.550293	1.20279	0.0002981	3.38e-06	1
MRPS18C	1.24254	0.0003048	3.46e-06	1
MBD4	1.14495	0.0003071	3.49e-06	1
LOC642817	1.10668	0.0003083	3.52e-06	1
MDM4	1.24922	0.0003128	3.58e-06	1
PLRG1	1.24116	0.0003249	3.72e-06	1
GSTT1	1.13366	0.0003276	3.76e-06	1
DLST	1.26167	0.0003282	3.78e-06	1
LOC653086	1.18385	0.0003298	3.8e-06	1
HS.191464	1.20729	0.0003367	3.89e-06	1
NOP5/NOP58	1.18385	0.0003403	3.94e-06	1
COX19	1.20773	0.0003417	3.97e-06	1
ITGB7	1.20715	0.0003423	3.98e-06	1
CD96	1.23442	0.0003475	4.05e-06	1
CLDND2	1.18455	0.0003587	4.19e-06	1
FGFBP2	1.11	0.0003632	4.27e-06	1
TNFSF10	1.18273	0.000364	4.27e-06	1
ZNF652	1.23564	0.0003656	4.3e-06	1
SUB1	1.17897	0.0003658	4.33e-06	1
LOC402251	1.14233	0.0003665	4.32e-06	1
PBX2	1.21684	0.0003716	4.4e-06	1
NDUFB7	1.24611	0.0003728	4.43e-06	1
POLE4	1.21581	0.0003785	4.51e-06	1
ATG10	1.15407	0.0003816	4.57e-06	1
PCMT1	1.1999	0.0003824	4.57e-06	1
LOC442535	1.19104	0.0003825	4.56e-06	1
SDF2L1	1.23885	0.0003888	4.67e-06	1
DUXAP3	1.12549	0.0003942	4.75e-06	1
UCHL3	1.25707	0.0003951	4.78e-06	1
U2AF1L2	1.24131	0.0003952	4.77e-06	1
LOC651149	1.22941	0.0004024	4.89e-06	1
GSTM2	1.06304	0.0004027	4.88e-06	1
UBXD4	1.14943	0.0004027	4.9e-06	1
POLR3GL	1.23518	0.0004115	5.02e-06	1
RAD51	1.18022	0.0004163	5.09e-06	1
LOC645138	1.09445	0.0004229	5.18e-06	1
TBCA	1.23457	0.0004245	5.21e-06	1
GALNT3	1.18638	0.0004269	5.25e-06	1
ATP6V1G1	1.13404	0.0004274	5.28e-06	1
CEACAM6	1.13494	0.0004275	5.27e-06	1
HS.541685	1.12259	0.0004323	5.35e-06	1
PSMB7	1.2566	0.0004351	5.4e-06	1
GOLGA8B	1.13766	0.0004521	5.62e-06	1
LOC401397	1.23548	0.0004626	5.76e-06	1
TIMM22	1.24564	0.0004638	5.79e-06	1
USP49	1.17288	0.000464	5.81e-06	1
RBM39	1.24642	0.0004678	5.87e-06	1
TNFRSF17	1.24719	0.0004681	5.88e-06	1
ANKRD55	1.23487	0.000469	5.91e-06	1
HS.563486	1.21907	0.0004875	6.15e-06	1
TRAPPC2L	1.25897	0.0004895	6.2e-06	1
PRDX4	1.09505	0.0004902	6.2e-06	1
FAM107B	1.20149	0.0004973	6.31e-06	1
C1ORF71	1.20555	0.0004988	6.35e-06	1
LOC641848	1.15194	0.0005043	6.44e-06	1
HS.436134	1.17592	0.0005059	6.48e-06	1
EBI2	1.19904	0.0005062	6.49e-06	1
SRP19	1.22026	0.0005151	6.62e-06	1
LOC127295	1.21242	0.0005157	6.64e-06	1
RHBDL2	1.15835	0.0005284	6.82e-06	1
LOC643997	1.24239	0.000532	6.88e-06	1
ZNF557	1.09745	0.0005352	6.94e-06	1
RPL12	1.25707	0.0005374	6.98e-06	1
CD5	1.17911	0.0005425	7.06e-06	1
ZNF773	1.18977	0.0005533	7.22e-06	1
MRLC2	1.221	0.000559	7.3e-06	1
LOC388789	1.20192	0.0005645	7.39e-06	1
ATP5EP2	1.20062	0.0005664	7.43e-06	1
LOC649447	1.23778	0.0005788	7.61e-06	1
MCOLN2	1.2133	0.0005928	7.81e-06	1
GSTO1	1.22654	0.0005998	7.92e-06	1
HS.133050	1.06101	0.0006122	8.1e-06	1
PITPNM1	1.20178	0.0006174	8.18e-06	1
HS.534439	1.10059	0.0006317	8.39e-06	1
STOML2	1.23047	0.0006341	8.44e-06	1
ADAM17	1.239	0.0006359	8.48e-06	1
GLRX	1.1157	0.0006402	8.55e-06	1
CCT2	1.21271	0.0006503	8.7e-06	1
SF1	1.19918	0.000656	8.8e-06	1
IGBP1	1.19275	0.0006591	8.86e-06	1
HNRPR	1.21139	0.0006654	8.96e-06	1
ICT1	1.23442	0.0006729	9.08e-06	1
CD2	1.21021	0.0006769	9.15e-06	1
RUNDC2C	1.17137	0.0006795	9.22e-06	1
LOC440704	1.12372	0.00068	9.21e-06	1
LOC153561	1.22684	0.0006859	9.33e-06	1
C9ORF46	1.22444	0.0006896	9.39e-06	1
LOC646849	1.23854	0.0006945	9.48e-06	1
LSM1	1.16863	0.0007015	9.59e-06	1
ZNF763	1.20671	0.0007031	9.64e-06	1
CD79A	1.11235	0.0007098	9.78e-06	1
CD19	1.13999	0.0007101	9.77e-06	1
HS.99472	1.1426	0.0007113	9.77e-06	1
SEC11C	1.18273	0.0007124	9.84e-06	1
CDC25B	1.17911	0.0007281	1.01e-05	1
TCEAL8	1.24425	0.0007289	1.01e-05	1
LOC649049	1.20294	0.0007291	1.01e-05	1
SH3BP1	1.14194	0.0007472	1.04e-05	1
GSTM1	1.06838	0.0007525	1.05e-05	1
HS.34558	1.19818	0.0007588	1.06e-05	1
RPL13	1.20627	0.0007701	1.08e-05	1
C1ORF41	1.24704	0.0007741	1.09e-05	1
C19ORF53	1.23335	0.0007748	1.09e-05	1
RARS	1.22055	0.0007781	1.1e-05	1
MS4A3	1.23153	0.0007794	1.1e-05	1
COX7B	1.12905	0.0008005	1.14e-05	1
ZBTB40	1.19603	0.0008019	1.14e-05	1
EOMES	1.16158	0.000803	1.14e-05	1
HSP90B1	1.21714	0.0008116	1.16e-05	1
COX5B	1.24301	0.0008125	1.16e-05	1
C16ORF61	1.18807	0.0008173	1.17e-05	1
DENR	1.13947	0.0008176	1.17e-05	1
GPR56	1.08814	0.0008185	1.17e-05	1
LOC400304	1.11284	0.0008258	1.19e-05	1
RPL10A	1.21227	0.0008259	1.19e-05	1
SYNJ2BP	1.1534	0.0008263	1.19e-05	1
LOC651763	1.06247	0.0008287	1.2e-05	1
PSMB6	1.22926	0.0008302	1.2e-05	1
CNGB1	1.16659	0.0008463	1.23e-05	1
LEP	1.18385	0.0008467	1.23e-05	1
LOC728565	1.22055	0.0008717	1.27e-05	1
ZCCHC6	1.17897	0.0008733	1.28e-05	1
GTF2B	1.23016	0.0008736	1.28e-05	1
SFRS16	1.22279	0.0008748	1.28e-05	1
DCLRE1C	1.15969	0.0008863	1.3e-05	1
CST7	1.19632	0.0008863	1.3e-05	1
LOC651894	1.2038	0.0008865	1.31e-05	1
HS.546375	1.07759	0.0008887	1.31e-05	1
C6ORF125	1.26295	0.0009011	1.33e-05	1
ATP5J2	1.21595	0.0009062	1.34e-05	1
HS.444999	1.18582	0.0009166	1.37e-05	1
DKFZP434B0335	1.16741	0.0009166	1.37e-05	1
LOC158301	1.23198	0.0009178	1.36e-05	1
EIF4A2	1.15768	0.0009178	1.36e-05	1
H2AFZ	1.20569	0.000923	1.38e-05	1
HSPA8	1.19746	0.000932	1.4e-05	1
ZNF91	1.09027	0.0009468	1.42e-05	1
HS.163752	1.09254	0.0009622	1.45e-05	1
SELPLG	1.16918	0.0009696	1.46e-05	1
PRICKLE4	1.21139	0.00097	1.46e-05	1
SSR4	1.22684	0.000977	1.48e-05	1
LOC284757	1.16252	0.0009848	1.49e-05	1
POLR2C	1.23213	0.0009985	1.51e-05	1
TYW1	1.0469	0.001	1.52e-05	1
TRAPPC4	1.23289	0.001004	1.53e-05	1
LOC92017	1.22639	0.001011	1.54e-05	1
COPS5	1.18948	0.001013	1.55e-05	1
LOC641693	1.22805	0.001014	1.55e-05	1
GUSBL1	1.21153	0.001014	1.55e-05	1
APOBEC3A	1.04112	0.001017	1.56e-05	1
ATP6V1E1	1.21139	0.001018	1.56e-05	1
MLLT6	1.18878	0.001021	1.57e-05	1
HS.551143	1.21714	0.001023	1.58e-05	1
LOC649150	1.1566	0.001025	1.58e-05	1
MGC4677	1.19703	0.001036	1.6e-05	1
HS.538099	1.11099	0.001042	1.62e-05	1
LOC650128	1.19019	0.001049	1.63e-05	1
LOC652578	1.23457	0.001063	1.66e-05	1
FAM14A	1.19446	0.001069	1.67e-05	1
RALGDS	1.21818	0.001071	1.67e-05	1
EIF2A	1.19589	0.001081	1.69e-05	1
POMP	1.2222	0.001084	1.7e-05	1
HS.538918	1.23916	0.001103	1.73e-05	1
ACAT1	1.21743	0.001116	1.76e-05	1
EIF2C2	1.2273	0.001129	1.78e-05	1
BLOC1S1	1.11371	0.001133	1.8e-05	1
HS.571887	1.20062	0.001134	1.8e-05	1
LOC440993	1.22714	0.001135	1.79e-05	1
C11ORF46	1.178	0.001136	1.8e-05	1
HMGB2	1.15035	0.001145	1.82e-05	1
TGFBR3	1.10461	0.001179	1.88e-05	1
LOC643007	1.23031	0.001179	1.88e-05	1
C17ORF63	1.21344	0.001182	1.89e-05	1
FLJ10213	1.20482	0.001186	1.9e-05	1
FLJ44124	1.15594	0.001197	1.92e-05	1
TACSTD2	1.20482	0.001204	1.93e-05	1
IAH1	1.21183	0.001204	1.94e-05	1
C12ORF62	1.22594	0.001204	1.94e-05	1
FLJ12078	1.21359	0.001212	1.97e-05	1
SDAD1	1.17827	0.001213	1.96e-05	1
GALM	1.25534	0.001213	1.97e-05	1
LOC728653	1.20467	0.001214	1.98e-05	1
MAL	1.16185	0.001214	1.98e-05	1
FKBP11	1.20744	0.001247	2.04e-05	1
SNRPB2	1.22926	0.00125	2.04e-05	1
FLJ11795	1.2276	0.001257	2.06e-05	1
CSF2RA	1.15634	0.00126	2.07e-05	1
LOC648984	1.16482	0.001261	2.08e-05	1
GVIN1	1.14273	0.001263	2.08e-05	1
DPY30	1.1976	0.001264	2.08e-05	1
LOC645385	1.17578	0.00127	2.1e-05	1
C8ORF45	1.09063	0.001273	2.1e-05	1
C22ORF16	1.18793	0.001316	2.18e-05	1
HYPK	1.16252	0.001352	2.24e-05	1
MBTD1	1.13212	0.001354	2.25e-05	1
LOC642035	1.15647	0.00136	2.26e-05	1
HS.555252	1.18357	0.001362	2.27e-05	1
RPL13A	1.18385	0.001364	2.27e-05	1
MFHAS1	1.25063	0.001365	2.28e-05	1
PIK3IP1	1.16252	0.001394	2.33e-05	1
LOC347292	1.1558	0.001395	2.34e-05	1
CHURC1	1.03864	0.001395	2.34e-05	1
WDR75	1.16212	0.001408	2.37e-05	1
OASL	1.16673	0.001427	2.41e-05	1
MT1F	1.20919	0.001428	2.41e-05	1
SDHALP1	1.20511	0.00143	2.42e-05	1
SSBP1	1.17233	0.001432	2.43e-05	1
LOC643433	1.21433	0.001435	2.43e-05	1
POFUT1	1.12905	0.001438	2.45e-05	1
SHROOM4	1.15181	0.001438	2.44e-05	1
SLC30A7	1.17536	0.00144	2.45e-05	1
LOC641710	1.24533	0.00145	2.47e-05	1
SPTAN1	1.17966	0.001454	2.48e-05	1
FKBP5	1.17	0.001459	2.5e-05	1
IL6R	1.13947	0.001461	2.5e-05	1
FLJ11783	1.23198	0.001469	2.52e-05	1
DRAP1	1.16104	0.00148	2.55e-05	1
VAMP8	1.18189	0.00148	2.54e-05	1
DRG1	1.23335	0.001487	2.57e-05	1
HS.544637	1.09878	0.001521	2.63e-05	1
ECHDC2	1.17343	0.001521	2.63e-05	1
LOC440345	1.22504	0.001525	2.64e-05	1
LOC286208	1.20308	0.001525	2.65e-05	1
ILF2	1.20744	0.001528	2.66e-05	1
CHST12	1.21625	0.001531	2.66e-05	1
FKBP14	1.10181	0.001534	2.67e-05	1
ZNF486	1.17371	0.00154	2.69e-05	1
HS.125087	1.213	0.00154	2.69e-05	1
LSM7	1.20019	0.001544	2.71e-05	1
HSD17B7	1.14653	0.001545	2.71e-05	1
PACS1	1.09075	0.001551	2.73e-05	1
LOC646630	1.16117	0.001553	2.73e-05	1
TTC14	1.18427	0.001571	2.77e-05	1
NOSIP	1.18455	0.001572	2.77e-05	1
HDDC2	1.17578	0.001573	2.78e-05	1
OLFM4	1.10681	0.001576	2.79e-05	1
MAGT1	1.1207	0.001578	2.8e-05	1
NUCB2	1.17343	0.00158	2.8e-05	1
CCBE1	1.11235	0.001584	2.82e-05	1
CBLB	1.17716	0.001587	2.83e-05	1
GM2A	1.18413	0.001645	2.94e-05	1
OAS2	1.17041	0.001647	2.94e-05	1
NSMCE4A	1.19489	0.001647	2.95e-05	1
C9ORF64	1.1288	0.001648	2.94e-05	1
METTL5	1.18793	0.001652	2.96e-05	1
ITM2C	1.16239	0.001685	3.03e-05	1
SLC35E1	1.16036	0.001692	3.05e-05	1
KTELC1	1.17855	0.001692	3.04e-05	1
DOCK10	1.14561	0.001702	3.07e-05	1
CD48	1.10754	0.001702	3.08e-05	1
HS.131087	1.16618	0.001703	3.08e-05	1
AMY1A	1.0866	0.001732	3.14e-05	1
PLXNC1	1.11012	0.001755	3.19e-05	1
ZNF600	1.1566	0.001756	3.19e-05	1
HS.184721	1.19574	0.001758	3.21e-05	1
CHD8	1.19175	0.001759	3.21e-05	1
TM7SF3	1.17689	0.00176	3.2e-05	1
DYNLT1	1.18835	0.001776	3.25e-05	1
ZNF827	1.19789	0.001778	3.25e-05	1
BPI	1.12372	0.001793	3.29e-05	1
HELZ	1.16973	0.001803	3.33e-05	1
DDX51	1.1636	0.001804	3.33e-05	1
IFI35	1.17869	0.001806	3.33e-05	1
TIGA1	1.19703	0.001809	3.33e-05	1
CWF19L2	1.21507	0.001842	3.41e-05	1
TARP	1.08648	0.001947	3.61e-05	1
MRPL17	1.1885	0.001955	3.63e-05	1
LOC648343	1.20788	0.00196	3.64e-05	1
SFMBT2	1.22026	0.001963	3.66e-05	1
BRSK1	1.1722	0.001967	3.67e-05	1
CD160	1.16754	0.001967	3.67e-05	1
EDG8	1.09806	0.001984	3.72e-05	1
CA5B	1.19489	0.001985	3.71e-05	1
NOLA3	1.14561	0.001996	3.75e-05	1
PDCD4	1.17082	0.001997	3.76e-05	1
FAM83F	1.02881	0.001998	3.75e-05	1
EIF3D	1.19976	0.002023	3.82e-05	1
PWP1	1.21286	0.002043	3.86e-05	1
XAB2	1.12663	0.002044	3.87e-05	1
CHMP5	1.16932	0.002047	3.87e-05	1
COX6A1	1.19689	0.002059	3.91e-05	1
SNRPF	1.19918	0.002067	3.93e-05	1
BIRC3	1.12435	0.00208	3.96e-05	1
HS.554324	1.16986	0.002085	3.98e-05	1
MRPS21	1.2038	0.002086	3.99e-05	1
VPS29	1.17192	0.002087	3.98e-05	1
FLT3LG	1.14929	0.002088	4e-05	1
PHKA2	1.20265	0.002088	3.99e-05	1
IFITM1	1.20773	0.002088	3.98e-05	1
NDUFA13	1.20992	0.002114	4.06e-05	1
LOC642103	1.04701	0.002119	4.08e-05	1
MRFAP1L1	1.19689	0.00212	4.08e-05	1
SNORD33	1.26952	0.002121	4.09e-05	1
IL7R	1.17661	0.002125	4.1e-05	1
GATAD2B	1.14639	0.002146	4.16e-05	1
KIR2DS5	1.0446	0.002147	4.16e-05	1
LBR	1.15527	0.002148	4.15e-05	1
CNIH4	1.11346	0.00215	4.19e-05	1
SAMD9L	1.15115	0.002151	4.18e-05	1
DARS	1.19332	0.002152	4.18e-05	1
C8ORF16	1.16023	0.002215	4.32e-05	1
CUTL1	1.17096	0.002216	4.33e-05	1
PDE7A	1.2133	0.002219	4.34e-05	1
HS.559008	1.19861	0.002223	4.35e-05	1
MKI67IP	1.18455	0.002232	4.38e-05	1
LOC647673	1.07158	0.002238	4.39e-05	1
TMEM126A	1.20062	0.002271	4.46e-05	1
LOC440157	1.12208	0.002271	4.47e-05	1
PELP1	1.1605	0.002296	4.53e-05	1
FAIM3	1.12095	0.002296	4.53e-05	1
ZNF14	1.11782	0.002309	4.56e-05	1
PDZK1IP1	1.06815	0.002321	4.59e-05	1
SLC25A19	1.20904	0.002344	4.64e-05	1
NFYB	1.12752	0.002346	4.65e-05	1
PCM1	1.17454	0.002351	4.68e-05	1
TMSB10	1.207	0.002352	4.67e-05	1
RPAIN	1.20744	0.002354	4.7e-05	1
LPCAT2	1.12613	0.002357	4.7e-05	1
ADAM8	1.11832	0.002364	4.73e-05	1
LOC651309	1.15274	0.002366	4.73e-05	1
MRPS7	1.2219	0.002387	4.78e-05	1
MGRN1	1.06986	0.002388	4.79e-05	1
CLIC1	1.14416	0.002423	4.87e-05	1
DOPEY2	1.14233	0.002474	4.99e-05	1
UIMC1	1.15234	0.002474	4.99e-05	1
PKP2	1.09878	0.002476	4.98e-05	1
LOC647856	1.1798	0.002477	5.01e-05	1
SRGN	1.14653	0.002477	4.99e-05	1
P117	1.20744	0.00249	5.04e-05	1
PSMC3	1.20817	0.00249	5.05e-05	1
C10ORF58	1.12372	0.002494	5.06e-05	1
HARS	1.21256	0.002552	5.19e-05	1
HS.561493	1.221	0.002553	5.19e-05	1
VCAN	1.10363	0.002567	5.23e-05	1
TAX1BP1	1.13869	0.002568	5.24e-05	1
RCP9	1.1542	0.002627	5.36e-05	1
CWC15	1.19861	0.002639	5.4e-05	1
NBPF20	1.14508	0.002644	5.42e-05	1
CETN2	1.21271	0.002645	5.42e-05	1
PEBP1	1.12284	0.002649	5.44e-05	1
CACNA1I	1.23396	0.002683	5.52e-05	1
RRM1	1.15035	0.002691	5.55e-05	1
ATP13A1	1.18906	0.002739	5.65e-05	1
ZNF69	1.10681	0.002755	5.69e-05	1
MATR3	1.12486	0.002756	5.7e-05	1
MRPL21	1.20861	0.002757	5.71e-05	1
HS.534427	1.14587	0.00278	5.77e-05	1
MGC3207	1.1868	0.002786	5.79e-05	1
HS.470804	1.18106	0.002786	5.79e-05	1
LYZ	1.15207	0.002815	5.86e-05	1
MTHFR	1.19646	0.002819	5.88e-05	1
MPPE1	1.18259	0.00282	5.89e-05	1
HS.37648	1.14142	0.00282	5.88e-05	1
MRPS33	1.22745	0.002828	5.92e-05	1
DDX24	1.17619	0.002847	5.96e-05	1
RPS9	1.19632	0.002864	6.01e-05	1
ZNF669	1.15287	0.002869	6.03e-05	1
LOC402694	1.16131	0.002901	6.1e-05	1
RASGRP2	1.17523	0.002923	6.16e-05	1
AIRE	1.16673	0.00293	6.18e-05	1
TTC5	1.21433	0.002937	6.21e-05	1
CDKN2AIPNL	1.167	0.002939	6.2e-05	1
PA2G4	1.12587	0.002953	6.25e-05	1
MAFA	1.1325	0.002959	6.27e-05	1
CYCSL1	1.19332	0.00296	6.29e-05	1
TRA2A	1.22549	0.002961	6.28e-05	1
LOC653080	1.17716	0.002962	6.33e-05	1
ZNF786	1.17028	0.002965	6.33e-05	1
LOC613037	1.15367	0.002966	6.32e-05	1
CFLAR	1.1443	0.002969	6.31e-05	1
HMBOX1	1.13443	0.002969	6.32e-05	1
PNPLA2	1.08613	0.002978	6.37e-05	1
PTGER2	1.16347	0.002979	6.41e-05	1
TUFM	1.19147	0.002981	6.4e-05	1
PAPD5	1.1854	0.002981	6.39e-05	1
LOC653829	1.1526	0.002982	6.42e-05	1
ARL16	1.1409	0.002983	6.4e-05	1
N4BP2	1.17165	0.002994	6.46e-05	1
ZNF562	1.17151	0.002995	6.47e-05	1
AIM2	1.20919	0.002996	6.46e-05	1
LAG3	1.16104	0.003003	6.5e-05	1
PPA1	1.13986	0.003091	6.71e-05	1
LIME1	1.16171	0.003091	6.7e-05	1
TRIM52	1.19104	0.003096	6.72e-05	1
GTPBP4	1.17371	0.003096	6.73e-05	1
STAMBPL1	1.13688	0.003097	6.74e-05	1
NUP37	1.20729	0.003134	6.83e-05	1
C6ORF129	1.20934	0.003141	6.86e-05	1
TTC17	1.21212	0.003162	6.91e-05	1
CLNS1A	1.16591	0.003192	7.01e-05	1
HIPK2	1.1636	0.003192	7e-05	1
YRDC	1.08131	0.003192	6.98e-05	1
CAPZA2	1.04954	0.003195	7.02e-05	1
PPA2	1.17606	0.003195	7e-05	1
SPNS1	1.20048	0.003268	7.21e-05	1
UCP2	1.04965	0.003269	7.2e-05	1
FLJ46309	1.10351	0.003269	7.2e-05	1
FBXL16	1.19033	0.003278	7.24e-05	1
IFIT2	1.09745	0.003287	7.27e-05	1
PAQR8	1.1439	0.003294	7.31e-05	1
ZNF622	1.18793	0.003296	7.3e-05	1
TXNDC12	1.17481	0.003297	7.31e-05	1
ZMAT2	1.16036	0.003299	7.33e-05	1
ZDHHC8	1.1744	0.003318	7.39e-05	1
C6ORF59	1.2285	0.003321	7.39e-05	1
HS.171171	1.17192	0.003322	7.42e-05	1
NDUFA8	1.19374	0.003323	7.41e-05	1
SMA4	1.16577	0.003343	7.47e-05	1
LOC23117	1.17689	0.00335	7.5e-05	1
HS.352677	1.17426	0.003363	7.54e-05	1
TRIP4	1.20875	0.003367	7.54e-05	1
NUP88	1.15982	0.003368	7.56e-05	1
COMMD1	1.1976	0.003385	7.61e-05	1
HS.490981	1.19303	0.00339	7.63e-05	1
BSG	1.04471	0.003418	7.7e-05	1
ZNF828	1.18737	0.003427	7.73e-05	1
KLRG1	1.11645	0.003427	7.74e-05	1
KLRF1	1.05307	0.003436	7.77e-05	1
KIAA0746	1.16293	0.003442	7.79e-05	1
PGLYRP1	1.05042	0.003446	7.81e-05	1
PKM2	1.14207	0.003536	8.03e-05	1
FYN	1.18892	0.003553	8.07e-05	1
KIAA1751	1.07945	0.003629	8.26e-05	1
C6ORF48	1.19175	0.003634	8.28e-05	1
SEPT6	1.17675	0.003669	8.37e-05	1
TMEM4	1.20409	0.003672	8.38e-05	1
HS.473191	1.15327	0.003678	8.41e-05	1
TXNDC1	1.08909	0.003696	8.47e-05	1
TTC19	1.17357	0.003696	8.46e-05	1
NKG7	1.12133	0.003705	8.5e-05	1
LDHA	1.14168	0.003715	8.54e-05	1
LOC644162	1.14299	0.003716	8.53e-05	1
P2RY5	1.13895	0.00372	8.56e-05	1
KCNH6	1.15701	0.003747	8.63e-05	1
CD6	1.17247	0.003786	8.73e-05	1
ERCC5	1.15607	0.003802	8.78e-05	1
HOXC10	1.06033	0.003805	8.8e-05	1
C16ORF56	1.16618	0.003814	8.86e-05	1
ERGIC1	1.15247	0.003814	8.85e-05	1
OAS1	1.15062	0.003817	8.84e-05	1
LOC123688	1.17467	0.003817	8.85e-05	1
WDR74	1.21714	0.00382	8.88e-05	1
LOC643949	1.1121	0.003836	8.93e-05	1
TBC1D10B	1.04493	0.003852	8.98e-05	1
COQ5	1.17689	0.003856	9e-05	1
CDC42	1.18106	0.003858	9.01e-05	1
ARPC2	1.17247	0.003862	9.03e-05	1
LOC728153	1.17454	0.003872	9.06e-05	1
AUTS2	1.08743	0.003881	9.1e-05	1
RNF19B	1.08648	0.003889	9.12e-05	1
LEF1	1.08932	0.003894	9.15e-05	1
CCDC71	1.23062	0.003906	9.18e-05	1
RPL36	1.1711	0.003921	9.23e-05	1
ACTR6	1.15473	0.003928	9.26e-05	1
C12ORF31	1.17165	0.003941	9.3e-05	1
AXIN2	1.14482	0.003947	9.34e-05	1
DDX50	1.17911	0.003948	9.33e-05	1
CALR	1.18864	0.003987	9.47e-05	1
EIF2AK4	1.15714	0.003988	9.45e-05	1
ZNHIT3	1.17883	0.00399	9.45e-05	1
LOC387841	1.18315	0.003995	9.5e-05	1
TMEM14C	1.15714	0.004002	9.53e-05	1
MRPL15	1.16185	0.004012	9.56e-05	1
UFC1	1.20366	0.004039	9.65e-05	1
HS.97779	1.08578	0.004041	9.64e-05	1
SNX2	1.1868	0.004066	9.72e-05	1
LOC646043	1.13701	0.004086	9.78e-05	1
MRPL3	1.14837	0.00409	9.8e-05	1
HMG1L1	1.1374	0.004128	9.9e-05	1
LOC643313	1.14012	0.004166	0.0001001	1
TOB1	1.20294	0.004167	0.0001002	1
CCDC84	1.17096	0.004233	0.000102	1
ASXL2	1.16144	0.004236	0.000102	1
TCEA3	1.15982	0.004246	0.0001024	1
C9ORF95	1.16333	0.004255	0.0001028	1
LOC441193	1.14613	0.00428	0.0001035	1
DNAJC9	1.20091	0.004319	0.0001045	1
TNPO3	1.19332	0.00432	0.0001048	1
D4S234E	1.02155	0.004325	0.0001048	1
GTF3A	1.12082	0.004346	0.0001055	1
COPS4	1.18231	0.004351	0.0001059	1
DAPP1	1.13122	0.004352	0.0001058	1
NBPF10	1.11259	0.00436	0.0001062	1
TTC1	1.22294	0.00437	0.0001066	1
NDUFV2	1.14495	0.004376	0.0001068	1
LOC647074	1.14456	0.004376	0.000107	1
MGC3020	1.15487	0.004377	0.0001072	1
OCIAD2	1.18708	0.004379	0.0001075	1
SRFBP1	1.18175	0.004379	0.0001071	1
BLMH	1.1489	0.004381	0.0001074	1
SPTLC1	1.14482	0.004404	0.0001082	1
MTIF3	1.17938	0.004414	0.0001086	1
SETD1A	1.15473	0.004418	0.0001088	1
COL4A3BP	1.15701	0.004484	0.0001107	1
GOLGA8A	1.11807	0.004486	0.0001106	1
IKZF1	1.06724	0.004491	0.000111	1
GATA2	1.14969	0.004499	0.0001113	1
CRBN	1.16577	0.004502	0.0001115	1
HS.202577	1.16591	0.004513	0.000112	1
LSDP5	1.15128	0.004516	0.0001119	1
TPST1	1.12309	0.004526	0.0001125	1
C5ORF39	1.16185	0.00453	0.0001128	1
PCDHB19P	1.19104	0.004533	0.0001129	1
HS.544409	1.01482	0.004614	0.0001151	1
ARMET	1.19389	0.004643	0.0001161	1
UHMK1	1.0819	0.004644	0.000116	1
WBSCR18	1.16063	0.004683	0.0001173	1
LOC389286	1.0917	0.004687	0.0001173	1
LOC163233	1.16077	0.004693	0.0001177	1
RNASEH1	1.1805	0.004698	0.0001182	1
STK39	1.13792	0.004699	0.0001183	1
ABCA1	1.06712	0.0047	0.0001186	1
NFS1	1.15794	0.004701	0.000118	1
TLR5	1.18161	0.004702	0.0001185	1
SLC44A4	1.17137	0.004703	0.0001182	1
TMED10	1.14416	0.004728	0.0001196	1
LOC645317	1.16374	0.00473	0.0001195	1
MGST3	1.16077	0.004745	0.0001201	1
LOC728518	1.20062	0.004776	0.000121	1
HS.386275	1.19603	0.004777	0.0001212	1
SOLH	1.14705	0.004877	0.0001238	1
HS.374460	1.14732	0.004877	0.000124	1
CCL5	1.16414	0.004887	0.0001244	1
ANXA2P1	1.05664	0.004893	0.0001246	1
PPRC1	1.18751	0.004893	0.0001248	1
MATK	1.14012	0.004913	0.0001254	1
C19ORF2	1.16144	0.004929	0.000126	1
MRPS24	1.18892	0.004933	0.0001262	1
MAPK8IP3	1.1121	0.004945	0.0001268	1
LOC642333	1.11049	0.004946	0.0001266	1
VDAC3	1.18977	0.004964	0.0001274	1
C14ORF166	1.12638	0.004975	0.0001278	1
DNAJC7	1.20005	0.004994	0.0001284	1
LOC401152	1.11757	0.005016	0.0001291	1
SH2D1A	1.11557	0.005073	0.0001307	1
HS.135282	1.16077	0.005075	0.000131	1
TSPAN31	1.17869	0.005077	0.0001309	1
LOC651064	1.10205	0.005102	0.0001321	1
C6ORF111	1.15274	0.005106	0.000132	1
LOC644852	1.0014	0.005107	0.0001321	1
HS.582113	1.20496	0.005137	0.0001332	1
LTF	1.13482	0.005148	0.0001337	1
LOC401233	1.01061	0.005151	0.0001342	1
WDR61	1.19346	0.005152	0.0001337	1
AZU1	1.1605	0.005152	0.000134	1
BBX	1.14469	0.005155	0.0001342	1
LAP3	1.10436	0.005157	0.0001346	1
HACL1	1.18036	0.005158	0.0001348	1
LOC732450	1.0983	0.005159	0.0001346	1
RPS3	1.21389	0.005164	0.0001351	1
HSPC268	1.12499	0.005164	0.0001359	1
CDC26	1.18371	0.005165	0.0001354	1
POLR2H	1.15915	0.005165	0.0001357	1
RPS28	1.04679	0.005167	0.0001363	1
HS.570343	1.1632	0.005168	0.0001362	1
CLDND1	1.12689	0.005168	0.0001359	1
XRCC2	1.08272	0.00517	0.0001357	1
SLFN13	1.17069	0.005187	0.0001369	1
LYAR	1.15035	0.005267	0.0001392	1
RIOK2	1.21139	0.005315	0.0001406	1
PIGY	1.12486	0.005443	0.0001444	1
ACADM	1.14745	0.005446	0.0001448	1
CDC5L	1.15781	0.005446	0.0001443	1
CHCHD2	1.11607	0.005447	0.0001442	1
MRPL14	1.18231	0.005447	0.0001447	1
ZNF160	1.1936	0.005453	0.0001451	1
BATF	1.20788	0.005453	0.0001454	1
C8ORF59	1.10522	0.005458	0.0001454	1
PPHLN1	1.20948	0.005489	0.0001465	1
LOC402644	1.178	0.005529	0.0001477	1
EVL	1.14982	0.005558	0.0001486	1
GLTSCR2	1.18343	0.005559	0.0001488	1
TRIM22	1.14233	0.005573	0.0001495	1
HS.373705	1.17426	0.005577	0.0001494	1
BEX2	1.19261	0.005586	0.00015	1
HS.571741	1.1534	0.005597	0.0001504	1
SLC38A1	1.13559	0.005625	0.0001513	1
BTF3	1.18511	0.005631	0.0001516	1
LOC441743	1.11123	0.00565	0.0001523	1
CCDC59	1.12918	0.00568	0.0001533	1
PLDN	1.11458	0.005696	0.0001538	1
POLR2A	1.09075	0.005764	0.0001558	1
CHMP4A	1.18497	0.005774	0.0001564	1
GTF2F1	1.17592	0.005775	0.0001566	1
UBE2E1	1.12689	0.005777	0.0001563	1
NPHP3	1.14194	0.005793	0.0001572	1
MRPL48	1.19832	0.005795	0.0001574	1
LOC728417	1.2012	0.005798	0.0001577	1
MRPS17	1.1966	0.005829	0.0001587	1
SPC24	1.15701	0.005834	0.0001589	1
XYLT1	1.10363	0.005893	0.0001607	1
LOC388654	1.09004	0.005901	0.0001611	1
SPRYD5	1.1733	0.005915	0.0001616	1
C14ORF82	1.10485	0.00592	0.0001619	1
MRPL22	1.16523	0.006144	0.0001685	1
TUBGCP5	1.16414	0.006145	0.0001687	1
CLEC4A	1.14051	0.006148	0.0001685	1
C12ORF47	1.14903	0.006153	0.0001685	1
TXNDC3	1.16333	0.00619	0.0001701	1
VNN2	1.11284	0.00622	0.0001711	1
IPP	1.14051	0.006231	0.0001716	1
FCRLA	1.05731	0.006241	0.000172	1
C8ORF40	1.16374	0.006241	0.0001723	1
ZNF275	1.18259	0.006242	0.0001722	1
RPL7L1	1.15141	0.00632	0.0001747	1
ENO2	1.167	0.006395	0.0001769	1
PAX7	1.13071	0.006399	0.0001772	1
SNRPA1	1.15367	0.006431	0.0001783	1
LOC730953	1.21271	0.006454	0.0001791	1
STAT4	1.14521	0.006477	0.0001801	1
ZBTB20	1.17647	0.006483	0.0001804	1
TMED3	1.16822	0.006483	0.0001806	1
LMOD3	1.11508	0.006483	0.0001801	1
LOC646567	1.16496	0.006488	0.0001811	1
TMEM17	1.11857	0.006489	0.0001809	1
EDG1	1.08038	0.00653	0.0001827	1
OCIAD1	1.10387	0.006532	0.0001826	1
TMEM70	1.17165	0.006533	0.000183	1
LOC152578	1.03018	0.006533	0.0001835	1
LOC646562	1.07689	0.006537	0.0001826	1
EFHA1	1.10816	0.006537	0.0001835	1
RPS23	1.01061	0.00654	0.0001834	1
HS.57870	1.01317	0.006558	0.0001844	1
IL32	1.15327	0.006563	0.0001847	1
LOC196752	1.19446	0.006565	0.0001851	1
ARID4B	1.1352	0.00657	0.0001856	1
HNRPA2B1	1.1352	0.00657	0.0001851	1
MTF2	1.1443	0.006574	0.0001855	1
G6PC	1.06451	0.006574	0.0001862	1
C15ORF28	1.17869	0.00658	0.0001862	1
LOC648003	1.09433	0.006583	0.0001862	1
KPNA6	1.14233	0.006619	0.0001877	1
RDH14	1.15835	0.006631	0.0001882	1
LOC389435	1.18779	0.006658	0.0001891	1
RETN	1.13456	0.006699	0.0001905	1
ZBP1	1.16009	0.006708	0.0001909	1
ALKBH8	1.16401	0.006769	0.000193	1
LOC728888	1.17	0.006772	0.0001929	1
LRFN3	1.17827	0.00681	0.0001944	1
TCF25	1.16158	0.006823	0.0001949	1
ACAD11	1.15314	0.006825	0.0001951	1
KLRD1	1.09878	0.006843	0.0001959	1
MSL3L1	1.20453	0.006866	0.0001967	1
PPIG	1.1755	0.006895	0.0001977	1
TNFSF14	1.10877	0.006917	0.0001985	1
ALG5	1.13999	0.00694	0.0001994	1
LOC643933	1.0176	0.006946	0.0001997	1
CATSPER2	1.12095	0.00696	0.0002003	1
SLC35A1	1.1073	0.006972	0.0002008	1
PNMA3	1.08778	0.006973	0.0002011	1
ZCCHC17	1.18413	0.006988	0.0002018	1
CBS	1.10668	0.006994	0.0002018	1
IER3	1.14443	0.006998	0.0002023	1
APEX1	1.17206	0.006998	0.0002025	1
ITPR3	1.10193	0.007017	0.0002033	1
C14ORF2	1.12982	0.00702	0.0002035	1
WBSCR22	1.16564	0.007054	0.0002047	1
BSDC1	1.1485	0.007054	0.0002049	1
EIF2B5	1.18694	0.007113	0.000207	1
C4ORF34	1.10705	0.007114	0.0002068	1
TNFRSF10A	1.17288	0.007143	0.000208	1
ARL6IP1	1.1443	0.007146	0.0002083	1
LRRC33	1.11794	0.007195	0.0002099	1
NDUFA12	1.15168	0.007213	0.0002106	1
PRKCQ	1.13314	0.007236	0.0002115	1
CCDC56	1.20221	0.007242	0.0002119	1
M6PR	1.15888	0.007243	0.0002123	1
HS.354359	1.17647	0.007247	0.0002122	1
IL17RA	1.16225	0.007267	0.0002132	1
LILRB1	1.15221	0.00731	0.0002148	1
EEF1D	1.20192	0.007316	0.0002148	1
EIF4A1	1.19403	0.007377	0.000217	1
MRPL2	1.17647	0.007405	0.000218	1
GPR89B	1.16414	0.007425	0.0002188	1
CNTNAP2	1.0791	0.007449	0.0002197	1
EBNA1BP2	1.16632	0.007468	0.0002208	1
HIST1H2BJ	1.1989	0.007474	0.0002208	1
CPVL	1.14077	0.007477	0.0002207	1
PTPN4	1.11582	0.007478	0.0002213	1
SSB	1.20279	0.007478	0.0002215	1
MAGOH	1.19947	0.00748	0.000222	1
LOC643287	1.08331	0.007481	0.0002218	1
RBM6	1.13999	0.007483	0.0002223	1
LOC439949	1.00837	0.007529	0.0002239	1
ERGIC2	1.03178	0.007554	0.0002248	1
ARTN	1.05899	0.007575	0.0002256	1
PSMC5	1.13084	0.007583	0.0002261	1
PTP4A2	1.16374	0.007603	0.0002271	1
HS.570385	1.15287	0.007606	0.0002269	1
HS.579631	1.13109	0.00775	0.0002317	1
LOC400986	1.09517	0.0078	0.0002334	1
GK5	1.13071	0.007859	0.0002353	1
LOC648024	1.07446	0.007885	0.0002363	1
TCF3	1.12765	0.007924	0.0002377	1
MRPS10	1.16428	0.007961	0.000239	1
LOC648099	1.17925	0.007978	0.0002397	1
ZNF573	1.18441	0.008007	0.000241	1
LOC391811	1.15821	0.00801	0.0002409	1
ASCC1	1.20005	0.008013	0.0002414	1
ALPL	1.03724	0.008017	0.000242	1
LOC652726	1.10448	0.008021	0.0002419	1
HS.284464	1.18568	0.00809	0.0002446	1
LOC728554	1.17206	0.008096	0.0002446	1
IRAK3	1.14574	0.008117	0.0002456	1
C5ORF28	1.12829	0.008138	0.0002465	1
AARS	1.13045	0.008148	0.000247	1
MITD1	1.18106	0.008163	0.0002477	1
HIGD2A	1.1546	0.008167	0.000248	1
HS.86941	1.07817	0.00821	0.0002497	1
LOC723972	1.17813	0.008212	0.0002496	1
ESD	1.17151	0.00825	0.0002516	1
NUP43	1.16374	0.008255	0.0002516	1
GIMAP1	1.07273	0.008283	0.0002535	1
AES	1.12537	0.008285	0.0002533	1
C7ORF27	1.10889	0.008287	0.0002532	1
CALML4	1.20525	0.008293	0.0002532	1
ERP27	1.15741	0.008332	0.0002552	1
FGD2	1.1409	0.008374	0.0002567	1
PLEKHA1	1.11235	0.008379	0.0002571	1
SYT11	1.14587	0.008436	0.0002602	1
SYTL2	1.11037	0.00844	0.0002596	1
CASP1	1.17744	0.008441	0.0002599	1
GLS	1.14077	0.008441	0.0002601	1
FAM46A	1.15942	0.008444	0.0002596	1
CBX3	1.17606	0.008447	0.0002594	1
HS.4988	1.13482	0.008464	0.0002613	1
KIAA1671	1.13792	0.00847	0.0002624	1
HS.555947	1.11222	0.008474	0.0002618	1
TTC27	1.15687	0.008475	0.0002623	1
GEMIN4	1.15902	0.008478	0.0002622	1
FCAR	1.13456	0.008483	0.000263	1
PPIL3	1.18723	0.008485	0.0002633	1
ATXN3	1.1892	0.008487	0.0002636	1
CYP26B1	1.17041	0.008543	0.0002655	1
KIAA0372	1.13817	0.008548	0.0002659	1
RECQL	1.17316	0.008588	0.0002676	1
RPL23A	1.11595	0.008594	0.0002676	1
RPSA	1.153	0.008599	0.0002682	1
CENPB	1.16442	0.008613	0.0002688	1
LOC441019	1.03724	0.008618	0.0002692	1
PDHB	1.16891	0.00862	0.0002698	1
DHX58	1.16374	0.008621	0.0002696	1
GNB2	1.11919	0.008644	0.0002707	1
CD24	1.04624	0.008662	0.0002715	1
EMR2	1.06542	0.008683	0.0002724	1
ZNF33B	1.15367	0.008692	0.0002729	1
SCFD1	1.17869	0.008714	0.0002745	1
MCTP2	1.08992	0.008718	0.000274	1
LOC440927	1.13882	0.008718	0.0002742	1
DDX27	1.17758	0.008718	0.0002744	1
LARP7	1.18231	0.008752	0.0002764	1
NDUFB11	1.16266	0.008755	0.0002763	1
AKR1C3	1.09242	0.008757	0.0002761	1
CDAN1	1.13869	0.008799	0.0002784	1
ZFP90	1.13482	0.008801	0.0002782	1
SPIB	1.06576	0.008831	0.0002796	1
PRO1853	1.14561	0.00884	0.0002801	1
ATP2B4	1.17744	0.008842	0.0002804	1
C20ORF116	1.19161	0.00886	0.0002815	1
UTP6	1.14982	0.008919	0.0002836	1
ITK	1.11632	0.008921	0.0002844	1
RAB11FIP5	1.15181	0.008923	0.0002839	1
C7ORF23	1.12397	0.008923	0.0002842	1
C11ORF63	1.11582	0.008934	0.000285	1
CHCHD9	1.14299	0.008957	0.000286	1
VIL2	1.13533	0.008978	0.0002869	1
ENSA	1.20861	0.008978	0.0002871	1
SURF6	1.14155	0.009048	0.0002898	1
MRPL23	1.18751	0.009108	0.000292	1
ELP2	1.17619	0.009123	0.000293	1
NKTR	1.12714	0.00913	0.0002929	1
NIF3L1	1.15513	0.009155	0.0002943	1
LOC645436	1.08366	0.00923	0.0002969	1
MYC	1.12284	0.009246	0.0002977	1
VSTM1	1.14771	0.009253	0.0002984	1
TPT1	1.12057	0.009259	0.0002983	1
SEC61G	1.17952	0.009286	0.0002997	1
BAG3	1.16131	0.009287	0.0003	1
C22ORF28	1.19204	0.009312	0.000301	1
PVRIG	1.11582	0.009321	0.0003021	1
PRF1	1.05164	0.009323	0.0003019	1
PCID2	1.16063	0.009323	0.0003016	1
HLA-DMA	1.13986	0.009343	0.0003033	1
EID2B	1.048	0.009345	0.0003031	1
PIAS4	1.18765	0.00949	0.0003083	1
C1ORF218	1.12537	0.009494	0.0003087	1
RPS11	1.17813	0.009523	0.0003099	1
TMEM60	1.16809	0.009577	0.0003119	1
MUS81	1.13714	0.00959	0.0003125	1
MGC33556	1.14129	0.009716	0.0003172	1
HS.580457	1.0866	0.009741	0.0003182	1
EIF3M	1.17883	0.009806	0.0003206	1
PRIC285	1.14064	0.009834	0.0003218	1
MIAT	1.03263	0.009835	0.0003236	1
CD74	1.09039	0.009839	0.000323	1
NCALD	1.14403	0.00984	0.0003233	1
DYNC1I2	1.18092	0.009842	0.0003226	1
HSPA1B	1.10035	0.009842	0.0003228	1
RPL37A	1.09135	0.009842	0.0003236	1
RNF24	1.08401	0.009847	0.0003225	1
TCEB2	1.15128	0.009911	0.0003264	1
C6ORF204	1.13986	0.009914	0.0003273	1
P4HB	1.14207	0.009916	0.0003268	1
METTL3	1.14666	0.009917	0.0003271	1
EP400	1.12701	0.009959	0.0003298	1
WDR6	1.11869	0.009965	0.0003298	1
RAB11FIP3	1.1566	0.009967	0.0003309	1
HS.317399	1.14299	0.009971	0.0003294	1
BCL11B	1.1207	0.009973	0.0003298	1
TARDBP	1.13058	0.009974	0.0003306	1
RPUSD4	1.14142	0.009974	0.0003308	1
HS.194225	1.12549	0.009999	0.0003322	1
IL4R	1.11445	0.01003	0.0003334	1
EXOSC1	1.2012	0.01004	0.000334	1
C14ORF102	1.14534	0.01009	0.0003361	1
RARS2	1.19175	0.01012	0.0003373	1
FBXO31	1.14416	0.01015	0.0003386	1
LTV1	1.16063	0.01015	0.0003388	1
ANAPC4	1.15794	0.01016	0.0003394	1
UCKL1	1.12259	0.01031	0.0003447	1
ZNF559	1.14548	0.01033	0.000346	1
TXK	1.09589	0.01033	0.0003458	1
UGCGL1	1.12221	0.01039	0.0003483	1
RPN2	1.14155	0.01042	0.0003495	1
CD27	1.05966	0.01044	0.0003504	1
HS.577763	1.07933	0.01046	0.0003515	1
UPF3A	1.14508	0.01049	0.0003528	1
HS.568777	1.18554	0.01051	0.0003536	1
KIAA0408	1.13817	0.01052	0.0003541	1
FLJ42957	1.14758	0.0106	0.0003576	1
SMARCC2	1.11807	0.01061	0.0003576	1
LOC654053	1.11982	0.01065	0.0003595	1
PPWD1	1.17536	0.01065	0.0003597	1
DC2	1.16482	0.01067	0.0003606	1
ORAI1	1.18175	0.01069	0.0003618	1
APBB1IP	1.07308	0.01071	0.0003626	1
NAP1L4	1.16727	0.01074	0.0003638	1
LOC648453	1.15009	0.01081	0.0003667	1
BOLA3	1.17412	0.01082	0.0003676	1
RP9	1.18008	0.01086	0.0003697	1
KRT73	1.17261	0.01087	0.0003693	1
CCDC14	1.09685	0.01087	0.0003697	1
EP300	1.09206	0.01088	0.0003707	1
HERC2	1.19432	0.01091	0.0003721	1
LOC729603	1.15942	0.01093	0.000373	1
BCL9L	1.10254	0.01101	0.000376	1
UPF3B	1.18385	0.01106	0.000378	1
ITGAL	1.12752	0.01107	0.0003785	1
MRPS31	1.14969	0.01108	0.0003797	1
FAM62A	1.11334	0.01108	0.0003796	1
GTF2F2	1.14338	0.01108	0.0003793	1
ZNF22	1.12524	0.01109	0.0003806	1
MED10	1.17952	0.01115	0.0003827	1
SELM	1.18147	0.01118	0.0003842	1
C17ORF70	1.16537	0.01118	0.0003843	1
C8ORF37	1.1489	0.01121	0.0003859	1
ADSL	1.1805	0.01123	0.0003868	1
DAD1	1.17536	0.01124	0.0003874	1
LRWD1	1.17028	0.01128	0.0003894	1
NECAP2	1.04756	0.01128	0.0003891	1
HS.427242	1.20019	0.01132	0.0003912	1
HS.512096	1.09481	0.01133	0.0003917	1
CYP1B1	1.03103	0.01136	0.0003931	1
MYO1F	1.07112	0.01137	0.0003936	1
SF3A3	1.15727	0.01137	0.0003941	1
KRCC1	1.12271	0.01138	0.0003954	1
RBM34	1.10339	0.01139	0.0003951	1
LOC387882	1.14403	0.01139	0.0003953	1
SYAP1	1.10497	0.01144	0.0003977	1
LOC647742	1.00786	0.01146	0.0003985	1
HNRPA1P4	1.13921	0.01146	0.0003988	1
SLC25A36	1.14929	0.01146	0.0003993	1
HS.158923	1.14482	0.01146	0.0003996	1
CGI-96	1.1909	0.0115	0.0004012	1
CCDC32	1.1685	0.01152	0.0004021	1
MGC61598	1.17952	0.01154	0.0004036	1
ZNF581	1.1396	0.01154	0.0004032	1
TBC1D10C	1.12931	0.01158	0.0004056	1
C14ORF173	1.14273	0.01158	0.0004053	1
ASAHL	1.14982	0.01164	0.0004081	1
LOC652775	1.11869	0.01166	0.000409	1
DUSP18	1.15194	0.01166	0.0004092	1
SAMD4B	1.14758	0.01167	0.0004099	1
RBM14	1.1546	0.01174	0.0004126	1
INTS8	1.06587	0.01175	0.0004138	1
C3ORF28	1.15808	0.01175	0.0004141	1
LOC644063	1.09601	0.01176	0.0004137	1
LOC728608	1.19417	0.01181	0.0004165	1
ZNF500	1.1562	0.01184	0.0004178	1
GHDC	1.16158	0.01184	0.0004185	1
LOC728481	1.10926	0.01185	0.0004183	1
LOC390354	1.15727	0.01198	0.0004242	1
SDCCAG1	1.18723	0.01199	0.000424	1
NAMPT	1.07631	0.01201	0.0004253	1
MORF4L2	1.15194	0.01201	0.0004257	1
C14ORF85	1.0513	0.01204	0.000427	1
STX8	1.16918	0.01207	0.0004286	1
APP	1.17247	0.01209	0.0004293	1
C1ORF56	1.18864	0.01212	0.0004307	1
ARGLU1	1.06485	0.01213	0.0004315	1
ZNF324	1.15247	0.01215	0.000433	1
NUP205	1.1236	0.01215	0.0004331	1
CXCR4	1.09769	0.01216	0.0004329	1
PTPN1	1.14325	0.01217	0.0004342	1
ADCY3	1.13161	0.0123	0.0004395	1
NDUFAB1	1.11445	0.01231	0.0004403	1
CWF19L1	1.15088	0.01242	0.0004445	1
LOC644591	1.1636	0.01245	0.0004458	1
ZNF816A	1.15861	0.01245	0.000447	1
ARHGDIA	1.08802	0.01245	0.0004471	1
TPM3	1.17827	0.01246	0.0004468	1
MCM3	1.1352	0.01246	0.0004468	1
CRISPLD2	1.0491	0.01247	0.0004482	1
SF3B14	1.11532	0.01251	0.0004517	1
DGCR8	1.13084	0.01251	0.0004511	1
YARS	1.15194	0.01251	0.0004502	1
BOP1	1.16347	0.01251	0.0004499	1
ZNF394	1.10473	0.01252	0.0004526	1
NPEPL1	1.15554	0.01252	0.0004524	1
RAB35	1.15287	0.01252	0.000451	1
LOC653800	1.17911	0.01252	0.0004516	1
MPO	1.17675	0.01253	0.0004534	1
PLCH2	1.13456	0.01257	0.0004554	1
ITIH4	1.20773	0.01261	0.0004569	1
MYCBP2	1.08921	0.01261	0.0004571	1
CCDC58	1.18287	0.01278	0.0004636	1
C20ORF3	1.0826	0.01288	0.0004679	1
MARCH6	1.14012	0.01288	0.000468	1
RAB3GAP1	1.13973	0.01289	0.000469	1
ZDHHC19	1.19332	0.01289	0.0004692	1
CXORF45	1.12892	0.01289	0.0004696	1
ZC3H15	1.14077	0.01289	0.00047	1
HCFC1	1.13559	0.01294	0.000472	1
UTP11L	1.1744	0.01298	0.0004746	1
NGDN	1.19389	0.01298	0.0004743	1
ZNF93	1.14012	0.01299	0.0004756	1
TMED9	1.16932	0.01299	0.0004743	1
C16ORF30	1.13417	0.013	0.0004755	1
MAP3K11	1.07354	0.01302	0.0004771	1
FLJ35801	1.17564	0.01307	0.0004793	1
SAMD3	1.12032	0.01308	0.0004799	1
MYST3	1.0618	0.01311	0.0004815	1
HS.574731	1.16293	0.01311	0.0004815	1
CAMK2N1	1.14038	0.01312	0.0004826	1
CYP4V2	1.13792	0.01313	0.0004831	1
RSL1D1	1.17014	0.01314	0.0004837	1
RBP7	1.06826	0.01314	0.0004843	1
EXOSC8	1.11932	0.01317	0.0004856	1
MARCO	1.16144	0.01318	0.0004868	1
C4ORF29	1.18455	0.01319	0.0004866	1
RPL23AP13	1.11334	0.01324	0.0004892	1
LOC643570	1.05775	0.01327	0.0004911	1
NDUFA9	1.17371	0.01337	0.0004956	1
SNTB2	1.16117	0.01337	0.0004958	1
HS.82028	1.09529	0.01338	0.0004967	1
PARP12	1.12537	0.01341	0.0004981	1
NENF	1.15115	0.01341	0.0004985	1
CASP5	1.19005	0.01342	0.0004992	1
NUDT2	1.19432	0.01353	0.0005036	1
PSMC6	1.17082	0.01361	0.0005068	1
UGCG	1.11632	0.01361	0.0005074	1
HS.443602	1.17633	0.01361	0.0005077	1
NAPSB	1.12045	0.01363	0.0005088	1
SNRP70	1.14077	0.01367	0.0005105	1
PHLDB1	1.00827	0.01372	0.0005128	1
GCLM	1.12208	0.01374	0.0005138	1
SPIN1	1.12841	0.01379	0.0005165	1
VBP1	1.0784	0.01384	0.0005186	1
SDCCAG10	1.16104	0.01386	0.0005198	1
FCGBP	1.11894	0.01386	0.0005204	1
ZW10	1.14929	0.01391	0.0005227	1
HS.171481	1.11445	0.01402	0.000527	1
LRMP	1.11148	0.01405	0.0005286	1
LOC642678	1.07365	0.01406	0.0005298	1
ZMYND19	1.20221	0.01407	0.0005295	1
WDR60	1.14995	0.0141	0.0005316	1
GTPBP6	1.15607	0.01412	0.000533	1
ZNF346	1.18357	0.01413	0.0005329	1
ARL5A	1.11346	0.01413	0.0005341	1
ZFP42	1.17758	0.01414	0.000534	1
PGM5	1.14338	0.01415	0.0005352	1
LOC387867	1.12651	0.01418	0.0005366	1
HS.551815	1.13623	0.01423	0.0005395	1
CCT8	1.1383	0.01423	0.0005391	1
TIMM23	1.15902	0.01424	0.0005407	1
CDK10	1.19403	0.01425	0.0005406	1
LTB4R	1.15287	0.01426	0.0005417	1
TREML2P	1.21847	0.01427	0.0005423	1
FAM113B	1.11148	0.01435	0.0005458	1
RPL27A	1.15701	0.01435	0.0005464	1
HRASLS3	1.10889	0.01435	0.0005465	1
HIRIP3	1.15741	0.0144	0.0005489	1
AP4B1	1.15274	0.01445	0.0005515	1
EML4	1.13533	0.01446	0.0005514	1
PDPR	1.13623	0.01447	0.0005529	1
SLC35C1	1.16131	0.01449	0.0005539	1
APH1A	1.14877	0.01451	0.000555	1
C1ORF176	1.04297	0.01451	0.0005555	1
FAM119A	1.03563	0.01451	0.0005556	1
CHST13	1.0353	0.01455	0.0005575	1
DDIT4	1.10314	0.01455	0.0005582	1
RBM33	1.09373	0.01459	0.00056	1
SUMF2	1.1558	0.01465	0.0005628	1
HS.561497	1.05186	0.01466	0.0005635	1
EIF4B	1.1343	0.0147	0.0005663	1
SF3A2	1.12663	0.01471	0.000566	1
USP33	1.18357	0.01472	0.000566	1
ATP1B2	1.20671	0.01482	0.0005715	1
ACTR10	1.12994	0.01483	0.0005714	1
HNRNPU	1.08167	0.01484	0.0005726	1
HSN2	1.20265	0.01484	0.0005731	1
SELS	1.17523	0.01487	0.000575	1
BARD1	1.16932	0.01487	0.0005748	1
NXT1	1.14534	0.0149	0.0005768	1
BTK	1.12524	0.01491	0.000578	1
ZNF430	1.1279	0.01492	0.0005776	1
RAPGEF6	1.12284	0.01492	0.0005787	1
MRPS9	1.16768	0.01493	0.0005808	1
NFKB2	1.15022	0.01493	0.0005807	1
LOC642934	1.03702	0.01493	0.0005794	1
UBAP2L	1.09325	0.01494	0.0005806	1
LTA4H	1.13237	0.01494	0.0005819	1
NUP107	1.13843	0.01495	0.0005804	1
EXOSC7	1.16414	0.01498	0.0005837	1
STT3A	1.15594	0.01502	0.0005854	1
GPR18	1.16212	0.01505	0.0005872	1
ITGAE	1.11995	0.01506	0.0005879	1
MAP2K1IP1	1.06542	0.01507	0.0005888	1
LOC644029	1.16306	0.01508	0.0005896	1
SBK1	1.13045	0.01509	0.0005904	1
HS.535028	1.10742	0.01529	0.0005996	1
CCDC77	1.16523	0.0153	0.0005992	1
WDR57	1.18483	0.0153	0.0005993	1
SAMD9	1.06883	0.01533	0.0006014	1
RGS19	1.0983	0.01534	0.0006027	1
HS.371006	1.12448	0.01535	0.0006025	1
UNC93B1	1.15768	0.01543	0.0006063	1
MRPS15	1.15287	0.01543	0.0006072	1
ENOPH1	1.14679	0.01543	0.0006078	1
FLJ45256	1.12701	0.01543	0.0006096	1
HS.568326	1.17123	0.01543	0.0006094	1
PRPSAP1	1.14943	0.01544	0.0006104	1
BTN3A2	1.11794	0.01544	0.0006091	1
HNRNPUL2	1.14129	0.01544	0.0006072	1
KLHL3	1.1288	0.01544	0.0006092	1
NFKBIA	1.11123	0.01545	0.0006088	1
ITGAX	1.08637	0.01549	0.0006131	1
SFRS6	1.14403	0.01552	0.0006147	1
TMEM147	1.14982	0.01553	0.0006153	1
MRPL54	1.16727	0.01557	0.0006173	1
HMG2L1	1.09039	0.01562	0.0006203	1
DDX1	1.13856	0.01562	0.0006199	1
BXDC2	1.17165	0.01564	0.0006213	1
C1ORF59	1.14286	0.01575	0.0006261	1
BNIP3	1.11657	0.01583	0.0006298	1
RETSAT	1.17275	0.01594	0.0006347	1
MFGE8	1.1207	0.01595	0.0006354	1
SAE1	1.13766	0.01603	0.0006389	1
TIAF1	1.1396	0.01613	0.0006435	1
DHRS3	1.14666	0.01618	0.0006458	1
HIGD1A	1.1147	0.01619	0.0006467	1
SPN	1.14482	0.0162	0.0006473	1
KIAA0460	1.14025	0.01627	0.0006506	1
HS.528873	1.12549	0.01643	0.0006575	1
UXT	1.1426	0.01644	0.0006582	1
FVT1	1.1562	0.01651	0.0006618	1
FKTN	1.12676	0.01657	0.0006644	1
ARID5B	1.1202	0.01657	0.000665	1
IFP38	1.04471	0.01659	0.0006662	1
SFRS5	1.13122	0.01684	0.0006771	1
TRIM56	1.09769	0.01685	0.000677	1
TMEM138	1.18008	0.01686	0.000679	1
RDH13	1.15487	0.01687	0.0006789	1
ARPC3	1.15035	0.01689	0.0006805	1
KCTD13	1.07921	0.01692	0.000682	1
FBL	1.13379	0.01694	0.0006832	1
PPP3CC	1.12208	0.01695	0.0006843	1
PARP1	1.08143	0.017	0.0006876	1
RBBP6	1.19503	0.017	0.0006882	1
COX4I1	1.16591	0.01701	0.0006873	1
SRXN1	1.07032	0.01701	0.0006875	1
UBL5	1.11894	0.01701	0.0006889	1
DDX47	1.14718	0.01703	0.00069	1
MFSD10	1.13934	0.01706	0.0006918	1
SKAP1	1.13353	0.01706	0.0006924	1
PLSCR1	1.13353	0.01708	0.0006941	1
CLK1	1.09016	0.01708	0.0006945	1
FXR2	1.04319	0.01708	0.0006935	1
PYHIN1	1.11682	0.0171	0.0006968	1
ACTN4	1.11844	0.01711	0.0006959	1
BTN3A1	1.14377	0.01712	0.0006968	1
LTA	1.14416	0.01712	0.0006982	1
THOC1	1.14273	0.01713	0.0007002	1
C12ORF41	1.14142	0.01713	0.0006981	1
ATP5G1	1.16632	0.01713	0.000699	1
C5ORF29	1.05966	0.01713	0.0006995	1
CD4	1.12032	0.01718	0.0007024	1
LOC654202	1.2164	0.01718	0.0007036	1
CARD8	1.14666	0.01719	0.0007033	1
LOC441124	1.16986	0.01723	0.000706	1
GUSBL2	1.16632	0.01724	0.000707	1
LMNB1	1.15848	0.01735	0.0007116	1
ZYG11B	1.11458	0.01736	0.0007125	1
DPYSL2	1.12778	0.01739	0.0007142	1
PPIH	1.1422	0.01741	0.0007158	1
WDR59	1.14534	0.01742	0.0007165	1
IL11RA	1.13263	0.01747	0.0007194	1
C6ORF130	1.17578	0.01747	0.0007192	1
SEC61A1	1.15848	0.01758	0.0007249	1
RPS12	1.18835	0.01759	0.0007249	1
FHOD1	1.13572	0.01759	0.0007258	1
ORMDL1	1.11819	0.01759	0.0007264	1
SERPINB6	1.15075	0.01763	0.0007314	1
PLEKHB1	1.1636	0.01764	0.0007288	1
VAMP2	1.07308	0.01764	0.0007294	1
FAM131A	1.1526	0.01764	0.0007308	1
NUPL2	1.15221	0.01764	0.0007313	1
HS.371060	1.16266	0.01765	0.0007301	1
ZNF12	1.10436	0.01765	0.0007307	1
TAF1C	1.13973	0.01767	0.0007335	1
BXDC5	1.12095	0.01768	0.0007343	1
C20ORF20	1.15154	0.01774	0.0007373	1
HS.137971	1.02365	0.01774	0.0007376	1
CCL3L3	1.01989	0.01778	0.0007402	1
SRRM2	1.11123	0.01778	0.0007412	1
KIR3DL3	1.04439	0.01779	0.000741	1
SMARCAL1	1.14051	0.01779	0.0007402	1
PRKCA	1.10767	0.01781	0.0007428	1
USP16	1.13533	0.01781	0.0007443	1
LOC728739	1.16932	0.01782	0.000744	1
PRPH	1.06112	0.01782	0.0007441	1
CALM2	1.09385	0.01782	0.0007458	1
C19ORF43	1.09421	0.01783	0.0007456	1
GTF2A2	1.15088	0.01784	0.0007472	1
TNFRSF25	1.10327	0.01792	0.0007524	1
TMPRSS9	1.07863	0.01793	0.0007523	1
IFIH1	1.09314	0.01793	0.0007518	1
LOC648210	1.09661	0.01794	0.0007516	1
MRPL24	1.16293	0.01797	0.0007548	1
RGS2	1.03659	0.01797	0.0007552	1
BZW2	1.13186	0.01797	0.000756	1
ATHL1	1.04026	0.01797	0.0007561	1
AMY1B	1.09842	0.018	0.0007581	1
GALNT11	1.13701	0.01807	0.0007616	1
CTSH	1.13122	0.0181	0.0007633	1
LRP3	1.14364	0.01814	0.0007658	1
LONP1	1.14679	0.01815	0.0007656	1
BBS2	1.12045	0.01821	0.0007693	1
RLF	1.13122	0.01823	0.000771	1
FAM62B	1.1084	0.01824	0.0007708	1
AK3	1.11932	0.01824	0.0007718	1
FAM102A	1.11844	0.01829	0.0007748	1
C11ORF1	1.18385	0.0183	0.0007759	1
AP2B1	1.17633	0.01831	0.0007759	1
ASGR2	1.15915	0.01832	0.000778	1
NCBP1	1.13908	0.01833	0.0007779	1
LOC440349	1.17233	0.01835	0.0007794	1
CUTA	1.15327	0.01835	0.000781	1
KIAA1881	1.08578	0.01836	0.0007809	1
PLA2G7	1.12145	0.01837	0.0007807	1
LOC347544	1.15835	0.01838	0.0007827	1
UQCRC2	1.10877	0.01841	0.0007847	1
GRIPAP1	1.1073	0.01842	0.0007868	1
C14ORF153	1.09866	0.01842	0.0007866	1
DKC1	1.10546	0.01842	0.0007859	1
LOC648249	1.13572	0.01843	0.0007858	1
C21ORF24	1.09999	0.01843	0.0007878	1
CRIP2	1.03178	0.01844	0.0007892	1
KLHDC3	1.11346	0.01845	0.0007891	1
SGSM2	1.12196	0.01855	0.0007943	1
SAFB2	1.10339	0.01864	0.0007989	1
SBNO2	1.01989	0.01866	0.0008003	1
HS.403972	1.14561	0.01908	0.0008185	1
SLAMF6	1.12246	0.01909	0.0008196	1
INSIG2	1.13947	0.01911	0.0008208	1
PPP2R1A	1.09517	0.01912	0.000822	1
C14ORF4	1.03114	0.01914	0.0008234	1
IMMT	1.06112	0.01917	0.000825	1
IL18	1.12816	0.01917	0.0008255	1
CUTC	1.13148	0.01923	0.0008285	1
CCDC109B	1.10181	0.01928	0.0008312	1
GIPC1	1.13097	0.01933	0.000834	1
DNMT1	1.10217	0.01933	0.0008344	1
LOC124446	1.12765	0.01937	0.0008368	1
DLD	1.1152	0.01941	0.0008398	1
NUP214	1.08909	0.01941	0.0008404	1
LOC643977	1.10914	0.01942	0.0008395	1
GIMAP5	1.11607	0.01942	0.0008397	1
PARP14	1.11	0.01944	0.0008422	1
ATP8B4	1.10939	0.01951	0.000846	1
DYRK4	1.13986	0.01952	0.0008466	1
HOPX	1.09182	0.01961	0.0008513	1
HS.213061	1.11111	0.01963	0.0008528	1
LOC644144	1.17509	0.01964	0.0008536	1
LOC652624	1.11819	0.01968	0.0008556	1
HS.534437	1.15902	0.01976	0.0008605	1
LOC401115	1.14692	0.01993	0.000869	1
GRAMD1A	1.1084	0.01999	0.0008721	1
SAPS2	1.19976	0.02004	0.0008749	1
MRVI1	1.16673	0.02009	0.0008772	1
ARID3A	1.09589	0.0201	0.000879	1
RNASEH2B	1.04504	0.02011	0.000879	1
GBF1	1.17481	0.02012	0.0008802	1
EPRS	1.13934	0.02013	0.0008813	1
POLR3C	1.1636	0.02013	0.0008819	1
DENND2D	1.09999	0.02013	0.0008829	1
C7ORF26	1.1236	0.02014	0.0008828	1
LOC647436	1.14495	0.02021	0.0008867	1
CKLF	1.10473	0.02021	0.0008874	1
HS.505676	1.12943	0.02024	0.0008897	1
NDUFS8	1.14012	0.02024	0.0008905	1
FNBP4	1.10023	0.02024	0.0008895	1
EIF3I	1.15314	0.02025	0.0008913	1
ISG20	1.14286	0.02041	0.0008989	1
TP53I13	1.14142	0.02042	0.0008999	1
CENTB1	1.10412	0.02045	0.0009017	1
TRAF3IP3	1.11757	0.02048	0.0009036	1
HS.535044	1.09027	0.02049	0.0009047	1
DNAJB11	1.14797	0.02052	0.0009065	1
LOC730432	1.04026	0.02052	0.0009088	1
LPP	1.12803	0.02053	0.0009084	1
CCDC45	1.12778	0.02053	0.000908	1
LOC283345	1.12816	0.02053	0.0009077	1
CRLS1	1.1288	0.02054	0.00091	1
PLAC8	1.11819	0.02054	0.0009104	1
METT10D	1.207	0.02059	0.0009152	1
PABPN1	1.11657	0.0206	0.000915	1
TRIM44	1.14077	0.02061	0.0009144	1
ZNF593	1.15969	0.02061	0.000915	1
FKBP1A	1.13792	0.02064	0.0009178	1
SERPINB1	1.11321	0.02069	0.0009205	1
RY1	1.11123	0.02069	0.0009213	1
UBE2N	1.11086	0.02069	0.0009215	1
HS.481659	1.12931	0.0207	0.0009227	1
XAB1	1.1485	0.02071	0.0009237	1
CCL4L1	1.07747	0.02071	0.0009242	1
GBP5	1.07991	0.02071	0.0009248	1
CHD9	1.07991	0.02078	0.000929	1
GCN5L2	1.13392	0.02079	0.0009288	1
MTA1	1.10828	0.02089	0.0009343	1
CNBP	1.12397	0.0209	0.0009355	1
KIAA0146	1.1605	0.0209	0.0009361	1
DUSP19	1.09987	0.02092	0.0009376	1
KRTCAP2	1.14982	0.02093	0.0009385	1
ANXA11	1.13649	0.02093	0.0009389	1
LOC554203	1.12982	0.02093	0.0009395	1
CCNL1	1.12727	0.02095	0.0009411	1
LOC388275	1.12892	0.02099	0.0009434	1
AKR1B1	1.13973	0.02102	0.0009451	1
SPATA13	1.0755	0.02105	0.0009474	1
HS.569948	1.14771	0.02107	0.0009486	1
TNIK	1.11371	0.02107	0.0009491	1
SHMT2	1.12233	0.02116	0.0009539	1
TNFAIP8L1	1.10522	0.02116	0.0009545	1
HEXB	1.13559	0.0212	0.0009567	1
XBP1	1.09601	0.0212	0.0009572	1
PPP2R3A	1.1352	0.02121	0.0009588	1
STEAP4	1.10497	0.02121	0.0009593	1
FCER2	1.07021	0.02122	0.0009588	1
LSM2	1.13598	0.02128	0.0009629	1
ATP6V0E2	1.10951	0.02143	0.0009705	1
PDXK	1.12246	0.02143	0.0009711	1
MRPL38	1.08861	0.02144	0.000972	1
TIA1	1.11894	0.02154	0.0009773	1
BTAF1	1.06135	0.02164	0.0009825	1
SRPK1	1.05719	0.02165	0.0009839	1
LOC653994	1.0798	0.02166	0.0009837	1
LOC388564	1.15473	0.02175	0.0009888	1
TRRAP	1.10926	0.02182	0.0009957	1
SRPRB	1.13623	0.02182	0.0009936	1
KIAA0391	1.09278	0.02182	0.0009947	1
GPR177	1.00776	0.02183	0.0009957	1
HSBP1	1.12575	0.02183	0.0009932	1
MBTPS1	1.12259	0.02183	0.0009944	1
GPX7	1.12448	0.02189	0.0009994	1
EMD	1.14377	0.02191	0.001001	1
DHRSX	1.13947	0.02193	0.001002	1
BRPF1	1.12575	0.02197	0.001005	1
KIAA0913	1.08921	0.02198	0.001006	1
OSCAR	1.12133	0.02199	0.001007	1
LOC651453	1.1534	0.02199	0.001009	1
LMNB2	1.15473	0.022	0.001008	1
HS.552025	1.07204	0.02206	0.001012	1
TBC1D15	1.11433	0.02217	0.001018	1
STX2	1.15101	0.02231	0.001025	1
LOC649821	1.12651	0.02231	0.001025	1
NEK8	1.17178	0.02232	0.001027	1
TOMM22	1.15487	0.02233	0.001028	1
BAX	1.18821	0.02236	0.00103	1
SLC36A4	1.07933	0.02238	0.001032	1
SCO2	1.13456	0.02254	0.00104	1
KIR2DL3	1.01812	0.02257	0.001042	1
GPR65	1.074	0.02258	0.001043	1
MTF1	1.10705	0.0226	0.001044	1
INTS3	1.11857	0.02261	0.001045	1
C6ORF190	1.06191	0.02268	0.001049	1
ARV1	1.15754	0.0227	0.001051	1
LOC648695	1.09926	0.02275	0.001054	1
MICAL1	1.09951	0.02275	0.001055	1
SH3BP5L	1.11161	0.02277	0.001056	1
ARRDC5	1.14142	0.02278	0.001056	1
CDK5R1	1.12524	0.02287	0.001062	1
LRRFIP1	1.01174	0.0229	0.001064	1
HS.520591	1.03648	0.02296	0.001068	1
AHCY	1.13649	0.02296	0.001068	1
DPP9	1.11483	0.02296	0.001067	1
LOC653314	1.11346	0.02313	0.001077	1
LOC650263	1.05932	0.02316	0.001079	1
POLR1C	1.16077	0.0232	0.001082	1
LMF2	1.10072	0.02321	0.001082	1
PPP2R3C	1.09469	0.02324	0.001085	1
SPCS1	1.12765	0.02338	0.001091	1
CDK5RAP2	1.16158	0.02345	0.001096	1
TCEAL3	1.16428	0.02345	0.001095	1
BLK	1.0661	0.02345	0.001097	1
HS.121070	1.11359	0.02346	0.001098	1
POLR1E	1.15835	0.02361	0.001106	1
CYP4F3	1.0098	0.02362	0.001107	1
TGFBRAP1	1.11173	0.02364	0.001109	1
RPS6KA4	1.08921	0.02369	0.001112	1
HSPD1	1.12158	0.0237	0.001113	1
TMEM59	1.11297	0.0238	0.001118	1
SR140	1.16741	0.02382	0.00112	1
MOV10	1.15527	0.02383	0.00112	1
NELL2	1.04789	0.02385	0.001127	1
LOC653702	1.16198	0.02385	0.001123	1
RANGAP1	1.13662	0.02386	0.001123	1
LOC388397	1.17343	0.02386	0.001128	1
HDAC2	1.07585	0.02387	0.001126	1
EIF2B4	1.15101	0.02387	0.001127	1
TLR4	1.08003	0.02388	0.001126	1
BAT1	1.07852	0.02388	0.001127	1
LOC648470	1.15594	0.02389	0.001126	1
IWS1	1.1566	0.02394	0.001134	1
NRBP2	1.15048	0.02395	0.001135	1
COMTD1	1.1562	0.02395	0.001133	1
UQCRFS1	1.13212	0.02408	0.001141	1
CCDC92	1.13033	0.02408	0.001143	1
NAT5	1.15247	0.02409	0.001143	1
LOC729843	1.12145	0.0241	0.001145	1
TMEM181	1.06338	0.02423	0.001152	1
LOC93622	1.13662	0.02427	0.001154	1
REXO4	1.14286	0.02447	0.001165	1
SIGLEC5	1.11682	0.02454	0.001168	1
BFAR	1.10902	0.02454	0.001169	1
MRPL45	1.14443	0.0246	0.001173	1
LAT1-3TM	1.16645	0.0247	0.001178	1
GNL3L	1.11198	0.02472	0.001179	1
EWSR1	1.12108	0.02477	0.001183	1
MAP4K1	1.11284	0.02481	0.001185	1
CBX7	1.10852	0.02482	0.001186	1
ZMYND11	1.10497	0.02492	0.001193	1
SUCLG1	1.14903	0.02492	0.001195	1
C9ORF164	1.08743	0.02493	0.001193	1
LOC728492	1.15154	0.02493	0.001194	1
CIR	1.0725	0.02493	0.001195	1
NOLA2	1.14273	0.02494	0.001194	1
JOSD1	1.11869	0.02496	0.001198	1
CD99	1.11557	0.02496	0.001198	1
NPAL3	1.13443	0.02498	0.0012	1
CCDC12	1.16496	0.02499	0.001201	1
HP	1.13546	0.02499	0.001202	1
MCTS1	1.13302	0.02504	0.001205	1
MRPL32	1.12385	0.02506	0.001207	1
FCRL3	1.08401	0.02507	0.001208	1
BDP1	1.1422	0.02516	0.001213	1
AGPAT9	1.03724	0.02518	0.001215	1
ZNF263	1.13135	0.02519	0.001215	1
NAT6	1.1162	0.02528	0.00122	1
TMEM126B	1.10327	0.02529	0.001221	1
POLR3A	1.15929	0.02533	0.001224	1
RALA	1.09004	0.02535	0.001226	1
TTC3	1.08096	0.02539	0.001229	1
DPEP3	1.13947	0.02541	0.001229	1
ZBED5	1.09733	0.02542	0.001231	1
PSMD6	1.13366	0.02545	0.001233	1
HERC6	1.12284	0.02546	0.001234	1
PHB	1.13585	0.02549	0.001237	1
BOK	1.05009	0.0255	0.001238	1
PSMC1	1.16333	0.02554	0.001241	1
IL2RG	1.14692	0.02559	0.001243	1
LRCH3	1.14508	0.0256	0.001245	1
ZNF57	1.13173	0.02566	0.001248	1
CXCR5	1.0879	0.02571	0.001251	1
MED28	1.1443	0.02574	0.001253	1
PSMA5	1.11782	0.02578	0.001257	1
COX5A	1.12145	0.02578	0.001258	1
C20ORF149	1.11037	0.02579	0.001257	1
EDC4	1.14194	0.02579	0.001258	1
LASS6	1.12486	0.02582	0.001261	1
NDUFB8	1.14025	0.02591	0.001266	1
TRPM6	1.06838	0.02595	0.001269	1
LOC441876	1.16455	0.02596	0.001272	1
FXYD5	1.13856	0.02597	0.001272	1
LOC399900	1.09349	0.02598	0.001271	1
NMI	1.0661	0.02598	0.001271	1
KIF1B	1.10988	0.02598	0.001273	1
TIAM1	1.14338	0.02599	0.001275	1
EPHA1	1.13714	0.02603	0.001277	1
ZSCAN18	1.07887	0.0261	0.001281	1
LOC441066	1.1685	0.02611	0.001282	1
KIAA0020	1.1542	0.02614	0.001285	1
TTC4	1.12905	0.02619	0.001288	1
SRP72	1.10193	0.02621	0.001289	1
DDX55	1.12233	0.02621	0.00129	1
RBM25	1.04004	0.02633	0.001297	1
YWHAQ	1.09987	0.02635	0.001298	1
PSMG2	1.12575	0.02637	0.001301	1
ATP5D	1.12385	0.02637	0.001302	1
SHCBP1	1.12956	0.02637	0.001301	1
EIF3F	1.14247	0.02638	0.001304	1
HMGN4	1.08921	0.02639	0.001301	1
LOC644039	1.11062	0.02643	0.001307	1
COQ2	1.13392	0.02652	0.001312	1
SELK	1.12095	0.0266	0.001317	1
AOF2	1.1147	0.02666	0.001321	1
ATXN2	1.11769	0.02668	0.001325	1
NPIP	1.11259	0.0267	0.001323	1
SNORA25	1.08155	0.0267	0.001324	1
TRPV2	1.13186	0.02674	0.001328	1
MPHOSPH8	1.14273	0.02676	0.001331	1
SLC37A4	1.14012	0.02676	0.001331	1
TMEM45B	1.11284	0.02676	0.00133	1
GOLGA3	1.0983	0.02684	0.001336	1
RGS14	1.12334	0.02696	0.001343	1
RAB12	1.18652	0.02697	0.001344	1
SNORD4A	1.15902	0.02698	0.001346	1
PASK	1.06247	0.02698	0.001347	1
QSOX2	1.12473	0.02699	0.001346	1
LOC645895	1.12918	0.02715	0.001357	1
HSCB	1.13973	0.02716	0.001357	1
RPL8	1.15768	0.02717	0.001357	1
STAT2	1.11807	0.0272	0.001361	1
INPP5E	1.0812	0.02721	0.001362	1
HS.546019	1.13714	0.02731	0.001368	1
MAN1C1	1.11259	0.02733	0.001369	1
LOC441155	1.18385	0.0274	0.001373	1
KIAA1618	1.13727	0.02743	0.001375	1
HINT2	1.14377	0.02749	0.001381	1
NOL8	1.11545	0.0275	0.00138	1
CD38	1.1241	0.02751	0.001381	1
LOC731096	1.126	0.02752	0.001383	1
TMEM106C	1.09806	0.02759	0.001387	1
TYW3	1.14824	0.02761	0.001389	1
TRIM38	1.12549	0.0277	0.001394	1
KLHL8	1.10803	0.0277	0.001395	1
SLU7	1.11272	0.02773	0.001398	1
MPHOSPH10	1.14495	0.02775	0.001398	1
B2M	1.10144	0.02784	0.001404	1
DYRK2	1.08436	0.02785	0.001406	1
DDT	1.10681	0.02786	0.001407	1
RABGGTB	1.13714	0.02791	0.001412	1
SAC3D1	1.13443	0.02791	0.001411	1
TAGAP	1.12663	0.02792	0.001411	1
ADAT1	1.14863	0.02799	0.001416	1
CROP	1.05977	0.02805	0.00142	1
IL2RB	1.03018	0.02809	0.001423	1
LOC642921	1.16741	0.0282	0.001429	1
SRP9	1.04058	0.02823	0.001432	1
ETFDH	1.13443	0.02823	0.001432	1
NEDD8	1.17028	0.02823	0.001433	1
DIAPH2	1.14403	0.0283	0.001437	1
TMEM109	1.11086	0.02834	0.00144	1
CXCR3	1.06598	0.02835	0.001441	1
RNF181	1.1302	0.02837	0.001443	1
ARS2	1.1241	0.0284	0.001446	1
CISH	1.13122	0.02841	0.001446	1
AVPI1	1.18441	0.02854	0.001454	1
PHIP	1.07782	0.02856	0.001456	1
CRKRS	1.12183	0.02861	0.001459	1
ARL6IP5	1.07515	0.02867	0.001463	1
HS.571946	1.16604	0.02869	0.001465	1
MRPL55	1.15141	0.02869	0.001465	1
RBM12B	1.05441	0.02881	0.001473	1
TOP2B	1.11	0.02881	0.001473	1
NOL11	1.10681	0.02881	0.001474	1
ZBTB9	1.14038	0.02887	0.001478	1
PUM1	1.1207	0.02888	0.001478	1
C16ORF58	1.11198	0.02899	0.001485	1
CES1	1.14548	0.02911	0.001493	1
SARM1	1.14548	0.02911	0.001494	1
CDC16	1.11508	0.02912	0.001495	1
MMS19L	1.1029	0.02928	0.001504	1
BLVRA	1.14784	0.02937	0.00151	1
TSPAN14	1.08354	0.02937	0.001511	1
HS.298873	1.16117	0.02938	0.001512	1
FAM126B	1.07677	0.0294	0.001514	1
ZRANB2	1.07492	0.02943	0.001517	1
LOC400464	1.15794	0.02944	0.001518	1
RUNX3	1.0791	0.02959	0.001526	1
CD320	1.12752	0.02964	0.00153	1
GTSCR1	1.18217	0.02965	0.001531	1
HNRPDL	1.11907	0.02966	0.001532	1
AHSA2	1.04877	0.02967	0.001534	1
C2ORF25	1.10779	0.02967	0.001534	1
PLEKHG3	1.0898	0.0298	0.001542	1
SFRS1	1.06815	0.02984	0.001545	1
CTSB	1.1343	0.02985	0.001546	1
GRAP2	1.13007	0.02991	0.00155	1
ANXA3	1.09218	0.03001	0.001557	1
LILRA5	1.06906	0.03001	0.001556	1
MCM6	1.10865	0.03011	0.001563	1
LAX1	1.10181	0.03016	0.001566	1
PIGM	1.11445	0.03021	0.00157	1
METAP1	1.0989	0.03025	0.001572	1
FAM38A	1.09963	0.03037	0.001579	1
XRCC5	1.11857	0.03046	0.001586	1
TXLNA	1.11272	0.03047	0.001585	1
BRD2	1.12385	0.0306	0.001594	1
NDUFB5	1.13482	0.03062	0.001595	1
TSHZ2	1.13792	0.03073	0.001602	1
ADCK2	1.12867	0.03074	0.001604	1
ZNF689	1.13623	0.03074	0.001604	1
RPL7A	1.0321	0.03079	0.001608	1
ANKMY2	1.14443	0.03089	0.001614	1
PDCL	1.16645	0.03097	0.00162	1
C10ORF104	1.08483	0.03098	0.001621	1
LOC338758	1.15075	0.03098	0.00162	1
PLA2G4B	1.11869	0.03101	0.001628	1
LOC651612	1.08767	0.03102	0.001624	1
HERC3	1.07805	0.03103	0.001628	1
RAVER1	1.10571	0.03104	0.001628	1
TMUB1	1.09938	0.03106	0.001628	1
NACA	1.11882	0.03107	0.001627	1
AP3M2	1.13456	0.03107	0.001628	1
NARS	1.08873	0.0311	0.001634	1
GDPD1	1.06621	0.03119	0.00164	1
LOC644774	1.0367	0.03119	0.001642	1
ZNF234	1.13934	0.0312	0.001641	1
C1ORF131	1.13007	0.0312	0.001645	1
PYGO2	1.14207	0.03121	0.00164	1
NOD2	1.08909	0.03121	0.001645	1
HCST	1.13507	0.03122	0.001644	1
ASNSD1	1.06918	0.03126	0.001649	1
HAT1	1.13173	0.03127	0.00165	1
LOC388524	1.12296	0.03131	0.001656	1
PTOV1	1.08814	0.03131	0.001655	1
PNPLA6	1.11844	0.03131	0.001653	1
ATP1A1	1.11185	0.03132	0.001655	1
LOC441773	1.1605	0.03134	0.001659	1
SPOP	1.15314	0.03134	0.00166	1
LOC728014	1.12397	0.03135	0.001658	1
BHLHB2	1.04921	0.03136	0.001661	1
MTERFD1	1.14286	0.03139	0.001664	1
RPS26P10	1.07388	0.03146	0.001669	1
SEC31A	1.11284	0.03149	0.001671	1
ATIC	1.08648	0.03169	0.001683	1
HS.254477	1.12108	0.03173	0.001686	1
C17ORF68	1.15433	0.03178	0.00169	1
MNT	1.10144	0.03181	0.001692	1
RPL19	1.1396	0.03183	0.001694	1
DDX60	1.12246	0.03196	0.001702	1
TRIB2	1.09529	0.03201	0.001705	1
SEPT7	1.03563	0.03213	0.001712	1
NDE1	1.09505	0.03213	0.001713	1
YEATS2	1.09314	0.03214	0.001715	1
PHB2	1.12233	0.03218	0.001718	1
TRIAP1	1.17069	0.0322	0.001722	1
CHRNA5	1.13456	0.0322	0.001722	1
APOBEC3C	1.10571	0.03221	0.00172	1
NBEAL2	1.06135	0.03223	0.001725	1
C1ORF181	1.09685	0.03224	0.001726	1
IMPDH2	1.10791	0.03243	0.001737	1
LOC731314	1.11408	0.03244	0.001739	1
SERGEF	1.15101	0.03247	0.001741	1
ETFA	1.14325	0.03248	0.001745	1
NOL9	1.17911	0.03249	0.001745	1
CAMLG	1.10681	0.0325	0.001744	1
HS.570988	1.03605	0.03251	0.001744	1
CSRP1	1.14745	0.03256	0.001751	1
HYLS1	1.16945	0.03257	0.001751	1
ANP32B	1.12473	0.03259	0.001754	1
LOC643665	1.05775	0.03263	0.001757	1
LOC643402	1.04286	0.03264	0.001757	1
ARPC1A	1.11383	0.03275	0.001765	1
HSPH1	1.07021	0.03282	0.001769	1
RPP21	1.14338	0.03282	0.00177	1
CDR2	1.10193	0.03283	0.001772	1
MCEE	1.1334	0.03305	0.001784	1
HS.202475	1.10497	0.03307	0.001786	1
GPSN2	1.11062	0.03307	0.001787	1
HS.231861	1.11062	0.03309	0.001789	1
[truncated: 1,335 more rows]

## Sheet: E-MTAB-4890
Gene	FC	q.Value	p.Value	Direction
HLA-DRB1	1.89502	3.08e-26	1.39e-30	1
HLA-DRB5	1.90476	4.73e-19	4.26e-23	1
CXCR4	1.34825	6.78e-12	9.16e-16	1
ACTG1	1.27584	2.02e-11	3.64e-15	1
LILRA3	1.56274	2.43e-10	5.48e-14	1
HBG2	1.1485	3.45e-10	9.33e-14	1
HBG1	1.15915	6.72e-10	2.12e-13	1
ALDOA	1.27943	1.38e-07	5.59e-11	1
TEP1	1.2038	5.53e-07	2.99e-10	1
ACTB	1.19918	2.27e-06	1.33e-09	1
FPR1	1.33905	8.98e-06	5.67e-09	1
ARHGAP30	1.20671	2.23e-05	1.61e-08	1
AQP9	1.30959	2.25e-05	1.73e-08	1
CRTAP	1.21403	2.53e-05	2.05e-08	1
FOLR3	1.08202	3.25e-05	2.79e-08	1
RBM43	1.16741	7.13e-05	6.42e-08	1
NFIC	1.10193	7.71e-05	7.29e-08	1
FAM118A	1.1334	9.93e-05	9.85e-08	1
LGALS3	1.17606	0.0001561	1.62e-07	1
ITGB1	1.19775	0.0002476	2.68e-07	1
PROK2	1.28667	0.0002834	3.32e-07	1
DKFZp761E198	1.23047	0.0002888	3.52e-07	1
RNF125	1.15714	0.0002934	3.31e-07	1
HBD	1.19947	0.0002948	3.72e-07	1
RGS1	1.18864	0.0002969	3.88e-07	1
ITGA2B	1.19005	0.000313	4.23e-07	1
MAT2B	1.23001	0.0003254	4.55e-07	1
IFITM3	1.17509	0.0003295	4.75e-07	1
LGALS2	1.15754	0.0004603	7.06e-07	1
MCL1	1.19303	0.0005734	9.05e-07	1
FCGR2A	1.26231	0.0006309	1.05e-06	1
CAMP	1.08425	0.0006424	1.04e-06	1
HBA1	1.14679	0.0008403	1.44e-06	1
TPM3	1.21862	0.0009073	1.68e-06	1
NCF1	1.10254	0.0009095	1.64e-06	1
ECGF1	1.18821	0.00103	2.04e-06	1
PDK4	1.12196	0.001096	2.22e-06	1
DUSP6	1.19489	0.001193	2.47e-06	1
STOM	1.16036	0.001336	2.89e-06	1
PARP10	1.07354	0.001345	2.97e-06	1
LOC728358	1.20482	0.001345	3.03e-06	1
CD8A	1.09457	0.001404	3.23e-06	1
WDR1	1.20613	0.001534	3.6e-06	1
THBS1	1.15996	0.001613	4e-06	1
DUSP2	1.20729	0.001622	3.95e-06	1
UBE2L6	1.16904	0.001646	3.93e-06	1
DUSP1	1.07285	0.001701	4.3e-06	1
CCT7	1.14077	0.001747	4.49e-06	1
PSMC4	1.14155	0.001764	4.61e-06	1
TAGLN2	1.10865	0.001768	4.7e-06	1
PBEF1	1.26088	0.001886	5.1e-06	1
LYZ	1.05507	0.001998	5.49e-06	1
COG5	1.29049	0.002037	5.69e-06	1
TRADD	1.18821	0.002412	6.96e-06	1
MAFB	1.14325	0.002442	6.93e-06	1
HLA-DQB1	1.0644	0.00261	7.65e-06	1
UBB	1.11408	0.002644	7.87e-06	1
GZMH	1.11919	0.002792	8.43e-06	1
ANPEP	1.13856	0.003228	1.05e-05	1
HSPA6	1.20627	0.003276	1.02e-05	1
TLR8	1.17911	0.00331	1.04e-05	1
METRNL	1.23503	0.003352	1.1e-05	1
FYN	1.13675	0.0035	1.17e-05	1
GRN	1.11957	0.0041	1.39e-05	1
MYL4	1.20178	0.004134	1.42e-05	1
HLA-DRB4	1.08167	0.004248	1.47e-05	1
CYP1B1	1.08897	0.004592	1.68e-05	1
CXorf34	1.14956	0.004611	1.66e-05	1
DDIT4	1.10351	0.004658	1.66e-05	1
CSF3R	1.09039	0.005016	1.85e-05	1
TSPO	1.18301	0.005041	1.91e-05	1
ERAF	1.1946	0.005136	1.97e-05	1
MAF	1.26342	0.005974	2.32e-05	1
S100A9	1.12208	0.006265	2.49e-05	1
ANXA2	1.16768	0.006279	2.46e-05	1
CYP27A1	1.22279	0.006643	2.7e-05	1
CD14	1.26358	0.006703	2.69e-05	1
CDC42SE2	1.18624	0.007063	2.93e-05	1
GNG10	1.14469	0.0071	3.01e-05	1
CDK5RAP3	1.04264	0.007126	2.92e-05	1
LOC643576	1.16863	0.007907	3.42e-05	1
TMEM158	1.02627	0.007973	3.41e-05	1
FLJ22662	1.01895	0.00861	3.8e-05	1
C4orf18	1.13598	0.008921	3.98e-05	1
TMEM176A	1.03734	0.009985	4.55e-05	1
S100P	1.19589	0.01047	4.82e-05	1
TSPAN9	1.10485	0.01098	5.1e-05	1
TNFAIP3	1.12752	0.01104	5.18e-05	1
PLEC1	1.09673	0.01258	6.01e-05	1
CD302	1.05921	0.01264	5.98e-05	1
JAK1	1.01864	0.01508	7.28e-05	1
PSMB8	1.07654	0.01589	7.74e-05	1
SOD2	1.1538	0.01842	9.38e-05	1
ALDH1A1	1.15088	0.01845	9.32e-05	1
NLRC5	1.02187	0.01855	9.28e-05	1
STK17B	1.07945	0.01893	9.73e-05	1
VNN1	1.11907	0.01965	0.0001028	1
CD9	1.10619	0.01974	0.0001041	1
IL8	1.07619	0.01976	0.0001024	1
GP9	1.13792	0.01977	0.0001052	1
HIST1H2AC	1.00533	0.02016	0.0001081	1
ATP6V0D1	1.15808	0.02131	0.0001153	1
QPCT	1.07701	0.02182	0.000119	1
HES4	1.18596	0.02195	0.0001217	1
TSPAN33	1.16618	0.02199	0.0001209	1
SNRPN	1.05119	0.02484	0.0001399	1
PPP3R1	1.04987	0.02515	0.0001451	1
FAM129B	1.19261	0.02569	0.0001494	1
AGPAT3	1.12752	0.02741	0.0001619	1
ADM	1.2279	0.0275	0.0001612	1
ISG15	1.11062	0.02816	0.0001688	1
TUBA1A	1.0929	0.0283	0.0001684	1
BTN3A3	1.10988	0.02866	0.0001731	1
TUBB	1.18441	0.03125	0.0001902	1
DPP7	1.16104	0.03154	0.0001933	1
CDKN2D	1.19918	0.03645	0.0002251	1
SIGIRR	1.11309	0.03845	0.0002392	1
PLEKHB2	1.11919	0.03884	0.0002434	1
CD163	1.10084	0.04084	0.0002577	1
CD36	1.04308	0.04128	0.0002624	1
SNCA	1.08956	0.04278	0.0002739	1
RBPMS2	1.08589	0.04296	0.0002769	1
EMILIN2	1.17096	0.04308	0.0002796	1
SERPINA1	1.12943	0.04351	0.0002864	1
MSL3L1	1.04254	0.04356	0.0002847	1
EIF4H	1.11907	0.04371	0.0002897	1
CRISPLD2	1.13779	0.04413	0.0002944	1
CLEC7A	1.12057	0.04436	0.0003019	1
FAM53B	1.1352	0.0446	0.0003016	1
C20orf55	1.21966	0.0448	0.0003009	1
CHST13	1.11321	0.04565	0.0003128	1
RNASE2	1.01947	0.0462	0.0003228	1
LCN2	1.07066	0.04627	0.0003212	1
SON	1.13314	0.04852	0.0003434	1
C19orf6	1.05307	0.04857	0.0003416	1
C1QA	1.14639	0.04926	0.0003531	1
HLA-C	1.00806	0.0494	0.0003519	1
RAB27A	1.12259	0.04975	0.0003588	1
RPS4Y1	0.666667	4.66e-20	2.1e-24	-1
EIF1AY	0.682594	9.38e-20	8.46e-24	-1
JARID1D	0.784314	1.07e-12	1.45e-16	-1
CYorf15A	0.798085	3.97e-09	7.16e-13	-1
RPL10A	0.665336	5.73e-09	1.29e-12	-1
MYOM2	0.958773	2.05e-08	7.39e-12	-1
CYorf15B	0.837521	2.28e-08	7.2e-12	-1
PRKY	0.856898	2.51e-08	6.79e-12	-1
FOS	0.87108	5.9e-08	2.4e-11	-1
C21orf81	0.69735	6.45e-08	2.91e-11	-1
EEF1B2	0.733138	1.58e-07	7.82e-11	-1
LRAP	0.746269	9.08e-07	4.91e-10	-1
SPATA13	0.722022	7.02e-06	4.11e-09	-1
KLRF1	0.736377	1.57e-05	1.06e-08	-1
KRT72	0.839631	1.62e-05	1.03e-08	-1
RPL7	0.71736	1.75e-05	1.26e-08	-1
PTMA	0.750188	3.49e-05	2.99e-08	-1
CA2	0.804505	3.56e-05	2.89e-08	-1
DKFZp686K16132	0.772798	3.94e-05	3.55e-08	-1
CNTNAP2	0.711238	4.07e-05	4.03e-08	-1
LOC400986	0.843882	6.06e-05	6.29e-08	-1
KIR2DL1	0.944287	6.38e-05	6.91e-08	-1
RPL14	0.762195	8.22e-05	9.26e-08	-1
RPL26	0.753012	0.0001829	2.23e-07	-1
UQCRH	0.761035	0.0001972	2.49e-07	-1
ACTR3	0.777001	0.000201	2.63e-07	-1
SFRS11	0.740192	0.000272	3.8e-07	-1
TAOK1	0.716846	0.0002744	3.96e-07	-1
KLRB1	0.840336	0.0002787	3.77e-07	-1
ERGIC2	0.711744	0.0002995	4.46e-07	-1
KLHL28	0.752445	0.0003092	4.74e-07	-1
PF4V1	0.86881	0.0005237	8.26e-07	-1
DDX17	0.772798	0.0005268	8.55e-07	-1
LRRN3	0.773994	0.000587	9.79e-07	-1
SUMO2	0.780031	0.0007507	1.32e-06	-1
YTHDC1	0.793651	0.000775	1.4e-06	-1
IFI44L	0.891266	0.0007942	1.47e-06	-1
LRRFIP1	0.940734	0.0008189	1.55e-06	-1
LMBRD1	0.85034	0.0008993	1.74e-06	-1
RPL27A	0.8726	0.00108	2.14e-06	-1
GOLGA8A	0.74129	0.001158	2.4e-06	-1
RPL23	0.757576	0.001183	2.4e-06	-1
LOC729416	0.882613	0.001198	2.54e-06	-1
EGR1	0.966184	0.001218	2.64e-06	-1
NT5C3	0.805802	0.001801	3.98e-06	-1
ZNF683	0.879507	0.00197	4.44e-06	-1
TDRD1	0.807754	0.00207	4.76e-06	-1
IL7R	0.760456	0.002492	5.84e-06	-1
SF1	0.827815	0.00252	6.02e-06	-1
ATHL1	0.892857	0.002684	6.53e-06	-1
ZNF679	0.856164	0.002874	7.25e-06	-1
LMOD3	0.896057	0.002952	7.58e-06	-1
CAPZA1	0.859107	0.003627	9.48e-06	-1
FOSB	0.923361	0.003678	9.78e-06	-1
IFP38	0.781861	0.003968	1.07e-05	-1
PTGES3	0.817661	0.004247	1.19e-05	-1
IGJ	0.896861	0.004312	1.23e-05	-1
FAM63A	0.88968	0.004657	1.34e-05	-1
COX6C	0.835422	0.004667	1.37e-05	-1
FRMD3	0.821693	0.005083	1.51e-05	-1
ATM	0.778816	0.005143	1.55e-05	-1
Sep-07	0.798085	0.005546	1.7e-05	-1
NELL2	0.791139	0.005957	1.88e-05	-1
CD164	0.809061	0.006038	1.88e-05	-1
HOP	0.805153	0.009465	3.03e-05	-1
HIST1H2BD	0.886525	0.01052	3.46e-05	-1
METTL7A	0.840336	0.01071	3.57e-05	-1
HIST1H4C	0.929368	0.01089	3.68e-05	-1
ZFP36L1	0.812348	0.01105	3.79e-05	-1
OSBPL8	0.803859	0.01107	3.84e-05	-1
RPS27A	0.805802	0.01108	3.9e-05	-1
TMEM14B	0.801925	0.01133	4.03e-05	-1
C6orf204	0.784929	0.01306	4.89e-05	-1
CHURC1	0.985222	0.01308	4.84e-05	-1
XBP1	0.839631	0.01313	4.79e-05	-1
HIST2H2BE	0.893655	0.01361	5.15e-05	-1
EDG1	0.83612	0.01405	5.38e-05	-1
TCP1	0.790514	0.01424	5.65e-05	-1
NUP43	0.909091	0.0144	5.65e-05	-1
UGCG	0.809717	0.01446	5.8e-05	-1
LEF1	0.816327	0.01456	5.64e-05	-1
NDUFB3	0.84674	0.01578	6.48e-05	-1
SSBP1	0.86881	0.01579	6.55e-05	-1
MAPK8IP3	0.819001	0.01587	6.73e-05	-1
S100A12	0.983284	0.01594	6.47e-05	-1
FAM122B	0.764526	0.01604	6.73e-05	-1
ZNF791	0.794913	0.01644	7.19e-05	-1
PURA	0.797448	0.01649	7.14e-05	-1
HNRPD	0.832639	0.01662	7.49e-05	-1
AHSA2	0.76746	0.01668	7.37e-05	-1
SLC5A8	0.841751	0.01672	7.46e-05	-1
NRGN	0.962464	0.01682	7.66e-05	-1
HIST1H4H	0.888099	0.01713	7.95e-05	-1
ABCA2	0.82713	0.01722	7.92e-05	-1
SLC16A3	0.83682	0.01749	8.2e-05	-1
HAT1	0.814996	0.0179	8.71e-05	-1
PAIP2	0.848896	0.01792	8.56e-05	-1
CD3E	0.884173	0.018	8.68e-05	-1
BUB3	0.819001	0.01803	8.53e-05	-1
RNASEH2B	0.796178	0.01818	9.02e-05	-1
TSPYL2	0.865801	0.01832	9e-05	-1
PSCDBP	0.813008	0.01888	9.45e-05	-1
ARHGEF1	0.898473	0.01919	9.69e-05	-1
LDHB	0.808407	0.02049	0.0001044	-1
RPL22	0.853971	0.02078	0.0001068	-1
KLRC3	0.844595	0.02081	0.0001107	-1
RPL7A	0.809717	0.02088	0.0001101	-1
SDPR	0.88574	0.02093	0.0001085	-1
C9orf77	0.802568	0.02096	0.0001096	-1
GUSBL1	0.825083	0.02236	0.0001199	-1
LIMS1	0.979432	0.02286	0.0001247	-1
AFTPH	0.839631	0.02314	0.0001283	-1
MTPN	0.846024	0.02316	0.0001274	-1
NFAT5	0.852515	0.02346	0.0001311	-1
C3orf28	0.799361	0.02446	0.0001378	-1
CCNT1	0.754717	0.02532	0.0001484	-1
ETS1	0.855432	0.02536	0.000144	-1
IFIT1	0.882613	0.02544	0.0001479	-1
RPS17	0.869565	0.02548	0.000147	-1
COX7B	0.83612	0.02589	0.000154	-1
SNRK	0.838926	0.02599	0.0001535	-1
METTL5	0.808407	0.02705	0.0001622	-1
EGR2	0.948767	0.02844	0.0001718	-1
ZNF641	0.806452	0.02846	0.0001732	-1
CRIPAK	0.802568	0.02927	0.0001795	-1
CCR2	0.944287	0.02937	0.0001814	-1
VPS35	0.837521	0.0299	0.000186	-1
DAPP1	0.808407	0.03222	0.0002019	-1
CLEC2D	0.841751	0.03232	0.0002039	-1
HMG1L1	0.841043	0.03292	0.0002093	-1
ARPC5	0.859107	0.03343	0.0002155	-1
CCDC117	0.847458	0.03352	0.0002146	-1
SBDS	0.834028	0.03443	0.0002235	-1
EVI2A	0.874891	0.03449	0.000227	-1
LAP3	0.914913	0.03461	0.0002293	-1
RGS2	0.917431	0.03469	0.0002268	-1
WDR23	0.843882	0.03526	0.0002368	-1
BTAF1	0.802568	0.0353	0.0002355	-1
TRIM38	0.778816	0.0359	0.0002476	-1
NUCB2	0.791766	0.03613	0.0002476	-1
STAG2	0.851064	0.03618	0.0002511	-1
GIMAP8	0.837521	0.03623	0.000245	-1
PTPRC	0.907441	0.0363	0.0002471	-1
CD74	0.961538	0.03633	0.0002555	-1
PTPN12	0.862813	0.03646	0.000258	-1
CLK1	0.862813	0.03648	0.0002549	-1
CCAR1	0.831255	0.03868	0.0002755	-1
CENPK	0.852515	0.04007	0.0002872	-1
LOC400566	0.92081	0.04024	0.0002903	-1
RAB33B	0.831947	0.04027	0.0002922	-1
IFIT2	0.90009	0.04104	0.0002997	-1
C1orf82	0.820345	0.04127	0.0003032	-1
FAM98A	0.805153	0.04179	0.0003203	-1
CRYZ	0.844595	0.04188	0.0003153	-1
NPIP	0.848896	0.04192	0.0003193	-1
AFF3	0.779423	0.04202	0.0003182	-1
ADD3	0.824402	0.04203	0.0003107	-1
USP9Y	0.855432	0.04212	0.0003152	-1
UBE2D3	0.893655	0.04216	0.0003135	-1
ACRBP	0.88574	0.04254	0.0003279	-1
TAF15	0.943396	0.04258	0.0003301	-1
DC2	0.92081	0.0426	0.0003341	-1
EIF1AX	0.866551	0.04263	0.0003363	-1
C21orf7	0.84246	0.04278	0.0003336	-1
FCER1A	0.904159	0.04278	0.0003394	-1
KPNA3	0.844595	0.04425	0.0003551	-1
FLJ34969	0.794913	0.04429	0.0003534	-1
LYCAT	0.84674	0.04432	0.0003616	-1
FLI1	0.861326	0.04433	0.0003597	-1
YRDC	0.882613	0.04439	0.0003662	-1
NARG1L	0.783699	0.04447	0.0003649	-1
NAP1L1	0.85034	0.045	0.0003732	-1
RKHD2	0.829876	0.04624	0.0003856	-1
AKTIP	0.789266	0.04682	0.0003926	-1
SACM1L	0.821018	0.04793	0.000404	-1
PLEKHA1	0.816993	0.04942	0.0004188	-1

## Sheet: E-MTAB-5151
Gene	FC	q.Value	p.Value	Direction
TNFSF10	9.34579	1.02e-41	2.48e-46	1
CCR2	8.96057	2.42e-41	1.18e-45	1
OAS1	7.91139	1.31e-37	9.6e-42	1
CX3CR1	8.07754	2.34e-37	2.29e-41	1
RARA	7.03235	7.58e-35	9.24e-39	1
ST8SIA4	6.19579	8.16e-33	1.39e-36	1
GIMAP6	6.11995	2.35e-32	4.57e-36	1
GIMAP8	5.95593	8.75e-32	1.92e-35	1
GAPT	5.16796	1.73e-28	5.05e-32	1
ZNF595	5.12295	3.8e-28	1.21e-31	1
GIMAP4	4.92368	1.47e-27	5.38e-31	1
MNDA	4.87805	5.72e-27	2.23e-30	1
TLR7	4.66636	8.16e-26	3.58e-29	1
TLR8	4.50248	1.4e-25	6.84e-29	1
IDH1	4.54545	1.69e-25	8.65e-29	1
LRRN3	4.50653	6.14e-25	3.59e-28	1
CYP1B1	4.2735	6.18e-25	3.46e-28	1
IRF2	4.36872	6.38e-25	3.89e-28	1
DDX60	4.4405	9.31e-25	5.9e-28	1
P2RY13	4.28816	1.5e-24	1.02e-27	1
SCD5	4.33276	1.59e-24	1.13e-27	1
DUSP7	4.05186	1.38e-23	1.08e-26	1
MS4A4A	4.16493	2.94e-23	2.36e-26	1
RAB10	3.97772	6.17e-23	5.26e-26	1
SMIM14	4.04858	1.19e-22	1.07e-25	1
GASK1B	4.04367	1.3e-22	1.2e-25	1
SGMS2	3.97614	1.82e-22	1.73e-25	1
ACADM	3.93856	3.22e-22	3.14e-25	1
MEGF9	3.91696	9.22e-22	9.21e-25	1
ECHDC1	3.80518	1.19e-21	1.22e-24	1
CTBP2	3.77929	1.37e-21	1.44e-24	1
TCL1A	3.78072	1.87e-21	2e-24	1
TP53	3.6914	2.06e-21	2.26e-24	1
OAS2	3.81243	2.21e-21	2.48e-24	1
PCMT1	3.72995	2.54e-21	2.91e-24	1
GBP1	3.8373	5e-21	5.85e-24	1
FGL2	3.72856	8.5e-21	1.04e-23	1
CETN3	3.65364	1.82e-20	2.26e-23	1
THEMIS	3.63901	3.79e-20	4.81e-23	1
SAMD9L	3.60881	5.11e-20	6.6e-23	1
TRIM5	3.52858	5.67e-20	7.46e-23	1
GIMAP1	3.45901	2.1e-19	2.91e-22	1
CASP2	3.49773	2.23e-19	3.21e-22	1
NDUFAF1	3.37041	3.92e-19	5.83e-22	1
MEF2C	3.39674	4.27e-19	6.45e-22	1
KRCC1	3.39098	5.12e-19	7.85e-22	1
HDHD2	3.45423	5.42e-19	8.46e-22	1
SEC62	3.36134	5.97e-19	9.46e-22	1
HSD17B4	3.39559	7.57e-19	1.25e-21	1
MARCHF1	3.35121	1.01e-18	1.73e-21	1
BRI3BP	3.36022	1.27e-18	2.2e-21	1
CD36	3.43053	1.61e-18	2.83e-21	1
CYSLTR1	3.25627	1.72e-18	3.06e-21	1
ARFIP1	3.23939	2.14e-18	3.96e-21	1
TFCP2	3.26264	2.44e-18	4.58e-21	1
SMCO4	3.26158	3.72e-18	7.06e-21	1
RNASEL	3.24044	4.28e-18	8.24e-21	1
ATF1	3.18776	6.73e-18	1.33e-20	1
LOC101928429	3.17662	7.95e-18	1.59e-20	1
NLRC4	3.17662	8.32e-18	1.68e-20	1
RCSD1	3.21647	8.69e-18	1.78e-20	1
LACTB2	3.16756	9.85e-18	2.04e-20	1
PSMB8-AS1	3.16456	1.23e-17	2.7e-20	1
CPSF2	3.14663	1.3e-17	2.95e-20	1
MEFV	3.15557	1.52e-17	3.52e-20	1
SLC35A5	3.14169	1.53e-17	3.49e-20	1
EEA1	3.18674	1.64e-17	3.84e-20	1
TMEM35B	3.12989	1.93e-17	4.56e-20	1
COA3	3.10752	2.39e-17	5.81e-20	1
ATP6V1C1	3.09406	2.46e-17	6.06e-20	1
OSBPL11	3.1211	2.6e-17	6.46e-20	1
BLNK	3.1211	2.62e-17	6.57e-20	1
MKKS	3.08166	3.48e-17	8.9e-20	1
LRIF1	3.08452	3.51e-17	8.88e-20	1
MS4A6A	3.09406	3.78e-17	9.77e-20	1
FCRLA	3.07409	4.68e-17	1.23e-19	1
SH3GL3	3.07692	4.69e-17	1.22e-19	1
GALNT7	3.06466	6.39e-17	1.7e-19	1
SLC35B3	3.05437	6.99e-17	1.88e-19	1
MRPS31	3.06466	7.43e-17	2.01e-19	1
ARMT1	3.06279	8.15e-17	2.23e-19	1
C14orf119	3.0248	9.36e-17	2.58e-19	1
KCTD12	3.0248	9.53e-17	2.65e-19	1
DYNC1I2	3.0021	1.21e-16	3.39e-19	1
TRIM14	3.02115	1.3e-16	3.68e-19	1
PPIL1	2.98418	1.94e-16	5.53e-19	1
DUSP6	3.0012	3.49e-16	1.02e-18	1
COPB2	2.93169	3.72e-16	1.1e-18	1
ARMC10	2.95247	3.8e-16	1.13e-18	1
CYBC1	2.94118	4.78e-16	1.47e-18	1
ACTL6A	2.936	4.98e-16	1.54e-18	1
PLPBP	2.92227	6.24e-16	1.98e-18	1
GNB4	2.93255	7.12e-16	2.27e-18	1
NACC2	2.92654	7.33e-16	2.36e-18	1
PID1	2.92141	7.76e-16	2.51e-18	1
IFIT3	2.72109	8.51e-16	2.8e-18	1
METTL7A	2.9036	8.56e-16	2.84e-18	1
GIMAP7	2.87522	1.04e-15	3.47e-18	1
TMEM251	2.84091	1.21e-15	4.14e-18	1
TLR4	2.83768	1.22e-15	4.13e-18	1
XIST	1.91608	1.46e-15	5.03e-18	1
BAIAP2-DT	2.86369	1.51e-15	5.27e-18	1
P2RY14	2.87109	1.55e-15	5.43e-18	1
IFNAR1	2.85714	1.69e-15	5.97e-18	1
TFEC	2.849	2.41e-15	8.68e-18	1
TNFAIP8L2	2.81611	2.57e-15	9.32e-18	1
TOMM5	2.83046	2.81e-15	1.03e-17	1
DCK	2.7933	5.18e-15	1.94e-17	1
SUCLA2	2.7894	5.28e-15	1.99e-17	1
SETX	2.76014	7.83e-15	3e-17	1
CASP8AP2	2.77469	8.64e-15	3.37e-17	1
VNN1	2.69107	8.86e-15	3.48e-17	1
RNF20	2.76167	8.97e-15	3.54e-17	1
HIKESHI	2.80505	9.44e-15	3.77e-17	1
IGHM	2.77162	9.46e-15	3.76e-17	1
GLT8D1	2.76625	9.81e-15	3.97e-17	1
IL17RA	2.74198	1.24e-14	5.06e-17	1
CARD8-AS1	2.74876	1.26e-14	5.16e-17	1
SEC23IP	2.73448	1.32e-14	5.42e-17	1
SLC35A1	2.76014	1.46e-14	6.05e-17	1
MSRB1	2.6824	2.21e-14	9.21e-17	1
SNX1	2.7027	2.26e-14	9.48e-17	1
SAMD9	2.69469	3.06e-14	1.3e-16	1
UBE2L3	2.68168	3.17e-14	1.35e-16	1
VPS35	2.69107	3.23e-14	1.38e-16	1
KDSR	2.70197	3.34e-14	1.44e-16	1
TMEM176B	2.46914	3.56e-14	1.56e-16	1
CSF1R	2.70051	3.57e-14	1.56e-16	1
GIN1	2.68601	3.82e-14	1.68e-16	1
CD1D	2.66525	4.03e-14	1.8e-16	1
IKBIP	2.69397	4.41e-14	1.98e-16	1
TIA1	2.68168	4.59e-14	2.07e-16	1
GCA	2.65816	4.71e-14	2.15e-16	1
MESD	2.66028	4.74e-14	2.15e-16	1
PRAG1	2.67809	4.85e-14	2.24e-16	1
SLC46A2	2.66525	4.9e-14	2.28e-16	1
CYB5B	2.65887	5.15e-14	2.41e-16	1
EPSTI1	2.71887	5.54e-14	2.61e-16	1
LILRB1	2.69324	5.57e-14	2.63e-16	1
CDC5L	2.63992	5.63e-14	2.69e-16	1
PRRG4	2.66383	5.64e-14	2.68e-16	1
MPEG1	2.68384	6.06e-14	2.91e-16	1
CLEC4E	2.66525	6.34e-14	3.06e-16	1
TIMMDC1	2.65604	6.51e-14	3.17e-16	1
HPSE	2.66312	6.51e-14	3.16e-16	1
ZNF559	2.62192	6.59e-14	3.23e-16	1
PRMT5	2.65745	6.87e-14	3.38e-16	1
C2orf74	2.65041	7.12e-14	3.52e-16	1
FUNDC1	2.65745	7.3e-14	3.65e-16	1
ZNF146	2.65041	7.32e-14	3.64e-16	1
EAF2	2.64271	7.65e-14	3.91e-16	1
GTF2H5	2.64831	7.66e-14	3.9e-16	1
TPMT	2.63783	8.45e-14	4.35e-16	1
RNASE6	2.62812	8.47e-14	4.37e-16	1
PTGER2	2.63435	8.63e-14	4.48e-16	1
XAF1	2.67881	9.68e-14	5.05e-16	1
DPYD	2.62881	9.81e-14	5.14e-16	1
SLC16A7	2.62536	1.11e-13	5.92e-16	1
TBC1D9	2.61849	1.13e-13	6.03e-16	1
COMMD10	2.6455	1.15e-13	6.17e-16	1
CASP6	2.62536	1.15e-13	6.22e-16	1
FUCA1	2.61575	1.26e-13	6.84e-16	1
ARL11	2.61643	1.28e-13	6.96e-16	1
SASH1	2.62123	1.48e-13	8.17e-16	1
GVINP1	2.59875	1.56e-13	8.62e-16	1
TBCK	2.64971	1.62e-13	9e-16	1
RIPOR2	2.62398	1.87e-13	1.04e-15	1
STAT1	2.61301	1.89e-13	1.06e-15	1
FAM118B	2.58732	2.04e-13	1.15e-15	1
PRICKLE1	2.6178	2.3e-13	1.31e-15	1
LARS1	2.62467	2.34e-13	1.34e-15	1
KMT5B	2.55167	2.4e-13	1.39e-15	1
MYOF	2.57998	2.4e-13	1.39e-15	1
IFIT1	2.59067	2.41e-13	1.4e-15	1
POT1	2.57931	2.48e-13	1.45e-15	1
M6PR	2.59067	2.66e-13	1.57e-15	1
SLC25A40	2.55754	3.1e-13	1.87e-15	1
HIBCH	2.57798	3.11e-13	1.86e-15	1
TRIM4	2.56937	3.18e-13	1.92e-15	1
CASP1	2.56674	3.35e-13	2.03e-15	1
SAC3D1	2.55885	3.43e-13	2.09e-15	1
MIB1	2.56213	3.59e-13	2.2e-15	1
DENND2D	2.54907	4.12e-13	2.54e-15	1
RB1	2.55754	4.24e-13	2.64e-15	1
PRF1	2.49813	4.26e-13	2.66e-15	1
NAGK	2.54842	4.27e-13	2.68e-15	1
SLFN5	2.54453	4.41e-13	2.78e-15	1
SPTSSA	2.55037	4.42e-13	2.78e-15	1
UBE2D1	2.54777	4.43e-13	2.81e-15	1
ALDH1A1	2.54582	4.74e-13	3.02e-15	1
SPRING1	2.55493	4.94e-13	3.16e-15	1
IGSF6	2.50564	5.03e-13	3.23e-15	1
PRKACB	2.51067	5.19e-13	3.35e-15	1
SLC25A46	2.53678	5.2e-13	3.35e-15	1
RNF14	2.52781	5.49e-13	3.56e-15	1
SKAP2	2.54712	5.62e-13	3.66e-15	1
ELP3	2.53807	5.98e-13	3.9e-15	1
ST6GAL1	2.54907	5.98e-13	3.92e-15	1
MSH2	2.51699	6.15e-13	4.05e-15	1
RECQL	2.54001	6.63e-13	4.38e-15	1
GON7	2.51446	7.53e-13	5.01e-15	1
TMEM87B	2.51826	7.78e-13	5.2e-15	1
TLR10	2.49875	9.31e-13	6.26e-15	1
VPS41	2.50564	9.52e-13	6.43e-15	1
LINC02504	2.50125	1.02e-12	6.91e-15	1
ATP6V1D	2.51826	1.02e-12	6.94e-15	1
SKA2	2.50188	1.06e-12	7.28e-15	1
MTIF3	2.50689	1.1e-12	7.58e-15	1
FAHD1	2.49688	1.12e-12	7.71e-15	1
VAMP4	2.52207	1.16e-12	8.02e-15	1
TMEM69	2.48509	1.21e-12	8.38e-15	1
ERMP1	2.48324	1.24e-12	8.62e-15	1
AP2B1	2.48385	1.38e-12	9.64e-15	1
SMC1A	2.4777	1.4e-12	9.84e-15	1
CBWD2	2.50063	1.43e-12	1.01e-14	1
TCTN2	2.46792	1.48e-12	1.04e-14	1
ATP10D	2.47219	1.86e-12	1.32e-14	1
CD79B	2.47647	2.04e-12	1.45e-14	1
SDHAF3	2.4728	2.07e-12	1.49e-14	1
UBTD2	2.45399	2.1e-12	1.51e-14	1
LILRA1	2.48324	2.17e-12	1.57e-14	1
ICE2	2.47219	2.17e-12	1.57e-14	1
TXNDC9	2.46366	2.26e-12	1.65e-14	1
STX7	2.44918	2.37e-12	1.74e-14	1
APAF1	2.46366	2.42e-12	1.79e-14	1
RTN1	2.4919	2.45e-12	1.82e-14	1
JCHAIN	2.45038	2.53e-12	1.88e-14	1
HERC4	2.43962	2.7e-12	2.02e-14	1
RSBN1L	2.45098	2.78e-12	2.08e-14	1
CYB5A	2.46063	2.91e-12	2.2e-14	1
BTN3A2	2.48942	2.97e-12	2.25e-14	1
CARD8	2.46366	3.01e-12	2.29e-14	1
KIAA0040	2.42836	3.18e-12	2.42e-14	1
ZKSCAN1	2.44858	3.41e-12	2.61e-14	1
STAMBP	2.44918	3.42e-12	2.63e-14	1
DPH3	2.42777	3.43e-12	2.64e-14	1
PRDX3	2.44559	3.57e-12	2.76e-14	1
PIGF	2.4325	3.65e-12	2.84e-14	1
OMA1	2.43013	3.65e-12	2.83e-14	1
LPCAT2	2.41779	3.71e-12	2.9e-14	1
THOC2	2.43902	3.72e-12	2.91e-14	1
CLEC12A	2.41488	3.82e-12	3e-14	1
LMO2	2.42248	3.95e-12	3.11e-14	1
DCP1B	2.42483	4.17e-12	3.29e-14	1
TK2	2.40964	4.36e-12	3.45e-14	1
GOLPH3L	2.41779	4.47e-12	3.56e-14	1
OPHN1	2.43962	4.48e-12	3.56e-14	1
ZFP64	2.41429	4.65e-12	3.72e-14	1
LYRM7	2.39177	5.1e-12	4.12e-14	1
UGDH	2.42365	5.16e-12	4.19e-14	1
KCNE3	2.41255	5.18e-12	4.21e-14	1
ATP11C	2.43962	5.38e-12	4.39e-14	1
MITD1	2.42072	5.62e-12	4.6e-14	1
UMAD1	2.42483	5.92e-12	4.86e-14	1
HS2ST1	2.40558	6.07e-12	5.01e-14	1
OIP5-AS1	2.41313	6.24e-12	5.2e-14	1
ATG4C	2.41955	6.24e-12	5.17e-14	1
FCRL3	2.42836	6.25e-12	5.19e-14	1
LRRK2	2.3872	6.52e-12	5.45e-14	1
DDX58	2.39808	6.68e-12	5.6e-14	1
WLS	2.41138	6.78e-12	5.7e-14	1
SLC25A11	2.40558	6.83e-12	5.76e-14	1
ABCF2	2.38152	7.88e-12	6.66e-14	1
UTP14C	2.3855	8.89e-12	7.58e-14	1
COMMD8	2.40442	9.13e-12	7.81e-14	1
METTL18	2.37192	9.75e-12	8.36e-14	1
ALDH6A1	2.38892	1.1e-11	9.5e-14	1
CBX1	2.38892	1.1e-11	9.58e-14	1
ASF1A	2.35349	1.22e-11	1.06e-13	1
NRG1	2.34137	1.24e-11	1.08e-13	1
NAIP	2.38209	1.25e-11	1.09e-13	1
RNF170	2.37361	1.27e-11	1.12e-13	1
MRPS28	2.3663	1.31e-11	1.15e-13	1
ZC3H13	2.37135	1.33e-11	1.18e-13	1
MYCL	2.36798	1.34e-11	1.19e-13	1
KMO	2.36072	1.36e-11	1.21e-13	1
RPE	2.36407	1.39e-11	1.24e-13	1
IL27RA	2.37361	1.41e-11	1.27e-13	1
TNFRSF17	2.36742	1.41e-11	1.27e-13	1
IGKV1-17	2.39349	1.43e-11	1.3e-13	1
SCOC	2.36128	1.47e-11	1.34e-13	1
CALHM2	2.34247	1.53e-11	1.4e-13	1
KLHL8	2.36351	1.6e-11	1.46e-13	1
CREBL2	2.37304	1.62e-11	1.49e-13	1
ZNF260	2.35849	1.63e-11	1.49e-13	1
GTF2H1	2.35627	1.65e-11	1.53e-13	1
TLR5	2.35073	1.72e-11	1.6e-13	1
BCL11A	2.36855	1.75e-11	1.63e-13	1
LOC100505549	2.3663	1.75e-11	1.63e-13	1
PRDX4	2.35239	1.78e-11	1.67e-13	1
NME6	2.3359	1.89e-11	1.77e-13	1
RSAD2	2.43962	1.9e-11	1.79e-13	1
RAB27A	2.36295	1.98e-11	1.87e-13	1
COLCA1	2.35073	2.06e-11	1.96e-13	1
TMPO	2.3546	2.09e-11	1.99e-13	1
PDHB	2.34192	2.14e-11	2.05e-13	1
PSEN1	2.3359	2.18e-11	2.09e-13	1
BANF1	2.34192	2.29e-11	2.21e-13	1
SLC40A1	2.33699	2.29e-11	2.2e-13	1
NADK	2.34192	2.29e-11	2.21e-13	1
PPP2CB	2.32775	2.45e-11	2.37e-13	1
CDK2AP2	2.31696	2.63e-11	2.56e-13	1
DPY30	2.33699	2.63e-11	2.56e-13	1
APEH	2.33209	2.64e-11	2.56e-13	1
CLN5	2.32612	2.75e-11	2.71e-13	1
PHACTR2	2.2237	2.87e-11	2.82e-13	1
EVI5	2.33481	2.94e-11	2.91e-13	1
UCP2	2.33645	2.99e-11	2.96e-13	1
GPR171	2.331	3.12e-11	3.11e-13	1
DNAJC10	2.34192	3.13e-11	3.14e-13	1
ITPRIPL2	2.30415	3.17e-11	3.19e-13	1
POU2AF1	2.31803	3.52e-11	3.56e-13	1
RIOX2	2.31911	3.52e-11	3.55e-13	1
CRYZ	2.26244	3.64e-11	3.69e-13	1
CISD1	2.30787	3.69e-11	3.75e-13	1
TRIQK	2.32829	3.7e-11	3.77e-13	1
HNMT	2.32288	3.74e-11	3.82e-13	1
IFI35	2.36463	3.76e-11	3.85e-13	1
CCDC22	2.3116	3.77e-11	3.87e-13	1
FAM114A2	2.30787	4.09e-11	4.23e-13	1
SCRN3	2.30256	4.12e-11	4.26e-13	1
SMIM30	2.31428	4.26e-11	4.43e-13	1
SLC44A1	2.30097	4.28e-11	4.47e-13	1
ATP6V1A	2.31	4.33e-11	4.54e-13	1
LINC00324	2.30097	4.34e-11	4.54e-13	1
IFI16	2.30787	4.38e-11	4.6e-13	1
CMPK2	2.30362	4.4e-11	4.63e-13	1
ALDH1B1	2.31428	4.49e-11	4.73e-13	1
CYBRD1	2.30681	4.74e-11	5.04e-13	1
STIP1	2.3015	4.74e-11	5.05e-13	1
NIF3L1	2.29991	4.78e-11	5.1e-13	1
NDUFA8	2.30574	4.8e-11	5.13e-13	1
CD14	2.3116	5.16e-11	5.55e-13	1
NFYB	2.29148	5.25e-11	5.66e-13	1
COQ5	2.29305	5.58e-11	6.04e-13	1
RAD50	2.292	5.83e-11	6.36e-13	1
DHRS4-AS1	2.29463	5.94e-11	6.52e-13	1
NUDCD1	2.28781	6.41e-11	7.09e-13	1
SNHG29	2.18198	6.41e-11	7.08e-13	1
NEK4	2.28415	6.43e-11	7.13e-13	1
NMT1	2.27998	6.46e-11	7.18e-13	1
KIAA0930	2.28363	6.48e-11	7.21e-13	1
MCTP1	2.28938	6.83e-11	7.64e-13	1
ADA2	2.26655	7.24e-11	8.13e-13	1
TRMT1L	2.29938	7.33e-11	8.25e-13	1
RER1	2.28938	7.35e-11	8.29e-13	1
MGAT2	2.26655	7.56e-11	8.57e-13	1
C15orf40	2.27221	7.94e-11	9.04e-13	1
TRIM27	2.27118	7.95e-11	9.02e-13	1
OPN3	2.28363	7.99e-11	9.11e-13	1
MRPL51	2.26552	8.12e-11	9.29e-13	1
METTL21A	2.28363	8.29e-11	9.49e-13	1
LBH	2.27066	1e-10	1.16e-12	1
HPS3	2.27376	1.05e-10	1.22e-12	1
TAF4	2.26244	1.07e-10	1.26e-12	1
GLB1	2.24669	1.21e-10	1.44e-12	1
OXR1	2.25581	1.21e-10	1.43e-12	1
RPAP3	2.25479	1.22e-10	1.44e-12	1
MINPP1	2.25378	1.23e-10	1.47e-12	1
MAD1L1	2.26347	1.23e-10	1.47e-12	1
SRBD1	2.25225	1.27e-10	1.52e-12	1
SLC27A3	2.25276	1.28e-10	1.54e-12	1
SLC16A3	2.13904	1.29e-10	1.55e-12	1
MRS2	2.25785	1.33e-10	1.61e-12	1
PHF6	2.24719	1.34e-10	1.62e-12	1
ATL3	2.25632	1.39e-10	1.69e-12	1
CYFIP1	2.2553	1.49e-10	1.81e-12	1
TMEM19	2.25683	1.58e-10	1.93e-12	1
EXOC5	2.23614	1.63e-10	2e-12	1
VPREB3	2.24065	1.65e-10	2.03e-12	1
C1GALT1C1	2.23264	1.68e-10	2.07e-12	1
CFAP298	2.23514	1.69e-10	2.09e-12	1
RACGAP1	2.24517	1.7e-10	2.1e-12	1
PCYOX1	2.21926	1.75e-10	2.17e-12	1
POLR3K	2.24014	1.76e-10	2.18e-12	1
MRPS18C	2.23314	1.78e-10	2.22e-12	1
MS4A7	2.24014	1.87e-10	2.33e-12	1
ICAM2	2.23364	1.88e-10	2.36e-12	1
MCM3AP	2.2119	1.89e-10	2.37e-12	1
MAT2B	2.2242	1.91e-10	2.4e-12	1
GRSF1	2.23414	1.92e-10	2.43e-12	1
PPP1R21	2.22965	1.94e-10	2.46e-12	1
MRPL18	2.21828	1.99e-10	2.54e-12	1
APPBP2	2.19829	2.04e-10	2.62e-12	1
HIGD1A	2.22816	2.05e-10	2.64e-12	1
VPS45	2.24115	2.07e-10	2.67e-12	1
PIN4	2.23414	2.09e-10	2.7e-12	1
AIDA	2.22668	2.14e-10	2.78e-12	1
FAR2	2.22767	2.17e-10	2.83e-12	1
LEF1	2.21926	2.3e-10	3e-12	1
JKAMP	2.21043	2.42e-10	3.18e-12	1
PHF14	2.19829	2.43e-10	3.2e-12	1
IKZF2	2.14041	2.62e-10	3.48e-12	1
NLRP12	2.20313	3.03e-10	4.08e-12	1
CLCN3	2.20507	3.15e-10	4.25e-12	1
PUDP	2.20507	3.15e-10	4.26e-12	1
GRN	2.2007	3.19e-10	4.31e-12	1
TNFSF13B	2.21435	3.23e-10	4.38e-12	1
FCN1	2.2168	3.39e-10	4.62e-12	1
THYN1	2.20653	3.4e-10	4.62e-12	1
FZD1	2.20264	3.4e-10	4.61e-12	1
SIRPG	2.19732	3.41e-10	4.65e-12	1
GLRX	2.19974	3.46e-10	4.75e-12	1
HCK	2.20313	3.55e-10	4.88e-12	1
QSER1	2.19443	3.64e-10	5.01e-12	1
AASDHPPT	2.20556	3.71e-10	5.12e-12	1
DNAJC13	2.21828	3.73e-10	5.16e-12	1
SLAMF7	2.17297	3.97e-10	5.5e-12	1
LPAR6	2.19058	4.02e-10	5.6e-12	1
FEM1B	2.19298	4.09e-10	5.72e-12	1
OSGEPL1	2.14408	4.14e-10	5.82e-12	1
COX15	2.19491	4.16e-10	5.86e-12	1
OSTM1	2.19346	4.2e-10	5.93e-12	1
CALHM6	2.1245	4.52e-10	6.42e-12	1
IRF5	2.16732	4.74e-10	6.78e-12	1
CCR1	2.13721	4.75e-10	6.77e-12	1
CHCHD1	2.16873	4.77e-10	6.83e-12	1
NHSL2	2.18293	4.83e-10	6.92e-12	1
SYNCRIP	2.17865	4.89e-10	7.03e-12	1
DTX3L	2.20361	4.9e-10	7.03e-12	1
ARFRP1	2.18341	5.17e-10	7.44e-12	1
FLI1	2.1978	5.63e-10	8.14e-12	1
STEAP4	2.08768	5.64e-10	8.17e-12	1
PPID	2.1796	5.71e-10	8.28e-12	1
RCBTB2	2.18579	5.76e-10	8.36e-12	1
MRPS18B	2.17202	5.81e-10	8.47e-12	1
PAQR8	2.1692	5.82e-10	8.47e-12	1
BTN3A3	2.1796	5.87e-10	8.58e-12	1
IPO8	2.17533	5.87e-10	8.56e-12	1
SIRPB2	2.17155	6.02e-10	8.82e-12	1
ZNF528	2.19154	6.18e-10	9.1e-12	1
RMI1	2.17486	6.19e-10	9.1e-12	1
MRPS14	2.16357	6.55e-10	9.68e-12	1
DYNLL1	2.1725	6.78e-10	1e-11	1
VPS72	2.1725	6.85e-10	1.02e-11	1
RECK	2.16216	7.09e-10	1.06e-11	1
HHEX	2.15796	7.39e-10	1.1e-11	1
CENPBD1P	2.16169	7.75e-10	1.16e-11	1
CES2	2.15657	7.84e-10	1.18e-11	1
ZDHHC16	2.14869	7.97e-10	1.2e-11	1
MRPL13	2.16216	8.09e-10	1.22e-11	1
CALML4	2.16263	8.26e-10	1.25e-11	1
AGA	2.16544	8.3e-10	1.26e-11	1
TOR4A	2.15889	8.75e-10	1.33e-11	1
MARCKS	2.10305	9.02e-10	1.38e-11	1
TMCO1	2.15193	9.11e-10	1.4e-11	1
MX1	2.24618	9.49e-10	1.46e-11	1
MPLKIP	2.15378	9.6e-10	1.48e-11	1
FES	2.14961	9.63e-10	1.48e-11	1
CWC27	2.1645	1.02e-09	1.57e-11	1
PSMA5	2.13356	1.04e-09	1.61e-11	1
EMG1	2.16967	1.08e-09	1.68e-11	1
MFSD14B	2.15008	1.08e-09	1.67e-11	1
TSPAN13	2.151	1.11e-09	1.74e-11	1
MYC	2.14087	1.15e-09	1.8e-11	1
RPA2	2.13265	1.16e-09	1.81e-11	1
ALDH18A1	2.14777	1.16e-09	1.82e-11	1
IQGAP1	2.11506	1.17e-09	1.84e-11	1
PITPNC1	2.14408	1.18e-09	1.85e-11	1
SELPLG	2.14961	1.18e-09	1.86e-11	1
RALA	2.12857	1.22e-09	1.93e-11	1
COG5	2.15008	1.24e-09	1.97e-11	1
PTPN6	2.12811	1.24e-09	1.98e-11	1
ADH5	2.14087	1.27e-09	2.03e-11	1
FMC1	2.12947	1.27e-09	2.03e-11	1
STYX	2.14454	1.29e-09	2.07e-11	1
AP4E1	2.12224	1.41e-09	2.27e-11	1
DPYSL2	2.16591	1.44e-09	2.32e-11	1
MTO1	2.13584	1.46e-09	2.35e-11	1
LY75	2.12044	1.5e-09	2.43e-11	1
SHQ1	2.12902	1.5e-09	2.42e-11	1
CREB1	2.10926	1.57e-09	2.55e-11	1
MGC70870	2.13083	1.62e-09	2.63e-11	1
MOSPD2	2.11506	1.62e-09	2.64e-11	1
XRCC4	2.12766	1.65e-09	2.71e-11	1
ANKRD50	2.12811	1.7e-09	2.79e-11	1
ATP8B2	2.13447	1.72e-09	2.82e-11	1
TMEM106B	2.13083	1.73e-09	2.85e-11	1
BMT2	2.12269	1.78e-09	2.94e-11	1
COPS5	2.11551	1.81e-09	2.99e-11	1
ANTXR2	2.11506	1.89e-09	3.13e-11	1
TRAPPC12	2.13402	1.94e-09	3.23e-11	1
HRH2	2.1182	1.97e-09	3.28e-11	1
LCLAT1	2.12224	1.97e-09	3.28e-11	1
PLAC8	2.13675	2.08e-09	3.48e-11	1
PGM2	2.11416	2.09e-09	3.5e-11	1
HERC6	2.16591	2.22e-09	3.75e-11	1
DNAJC24	2.09952	2.25e-09	3.8e-11	1
GBE1	2.10926	2.29e-09	3.87e-11	1
FPGT	2.11104	2.34e-09	3.97e-11	1
FAM111A-DT	2.10526	2.36e-09	4.01e-11	1
ARMC1	2.11015	2.39e-09	4.06e-11	1
ME2	2.11909	2.44e-09	4.16e-11	1
CKLF	2.10172	2.79e-09	4.79e-11	1
LRRC25	2.09556	2.82e-09	4.86e-11	1
UBE2V2	2.09074	2.87e-09	4.94e-11	1
PARP1	2.10305	2.96e-09	5.12e-11	1
TDRD7	2.10084	2.96e-09	5.11e-11	1
MRPS12	2.09205	3.02e-09	5.24e-11	1
FCGR1B	2.10926	3.02e-09	5.25e-11	1
CARD6	2.08203	3.02e-09	5.24e-11	1
TASOR	2.10881	3.05e-09	5.32e-11	1
AIM2	2.11149	3.1e-09	5.42e-11	1
C2orf76	2.10349	3.12e-09	5.46e-11	1
ZMAT3	2.079	3.21e-09	5.62e-11	1
HLA-DRB4	1.65098	3.24e-09	5.69e-11	1
TCEAL8	2.08768	3.26e-09	5.72e-11	1
ORAI3	2.08768	3.32e-09	5.85e-11	1
SETDB2	2.10172	3.34e-09	5.89e-11	1
ANXA4	2.08899	3.38e-09	5.97e-11	1
SAMM50	2.09996	3.5e-09	6.19e-11	1
KRBOX4	2.08899	3.51e-09	6.21e-11	1
RBM47	2.06441	3.65e-09	6.5e-11	1
CTSB	2.0842	3.75e-09	6.7e-11	1
CARNMT1	2.0842	3.75e-09	6.68e-11	1
PARP9	2.11372	3.85e-09	6.89e-11	1
VTA1	2.0816	3.95e-09	7.11e-11	1
CSTF2T	2.07254	3.95e-09	7.11e-11	1
MTLN	2.0816	3.98e-09	7.18e-11	1
PIK3AP1	2.06569	3.99e-09	7.21e-11	1
ARHGAP30	2.08899	4.13e-09	7.47e-11	1
C6orf120	2.07641	4.26e-09	7.71e-11	1
PYHIN1	2.03459	4.3e-09	7.81e-11	1
CTNNA1	2.05255	4.4e-09	7.99e-11	1
RAB28	2.08594	4.44e-09	8.08e-11	1
HPF1	2.07598	4.5e-09	8.2e-11	1
ORMDL2	2.07383	4.53e-09	8.29e-11	1
ATF6	2.07987	4.59e-09	8.4e-11	1
IL32	2.06101	4.83e-09	8.85e-11	1
EPB41L3	2.03749	4.92e-09	9.04e-11	1
DTD2	2.07211	4.99e-09	9.17e-11	1
DOCK8	2.0816	5.09e-09	9.38e-11	1
WBP1L	2.09952	5.1e-09	9.43e-11	1
ARRB1	2.06654	5.13e-09	9.5e-11	1
PPP3CA	2.07727	5.14e-09	9.53e-11	1
AP1AR	2.07039	5.16e-09	9.58e-11	1
CD27	2.07383	5.34e-09	9.95e-11	1
NT5E	2.0517	5.53e-09	1.03e-10	1
MRPL15	2.06996	5.59e-09	1.04e-10	1
GTF2E1	2.04207	5.7e-09	1.07e-10	1
USO1	2.07082	5.71e-09	1.07e-10	1
HAUS1	2.05423	5.72e-09	1.07e-10	1
GSK3B	2.07168	5.72e-09	1.07e-10	1
KYNU	2.06228	5.88e-09	1.11e-10	1
MRPL19	2.0674	5.92e-09	1.12e-10	1
SLC8A1	2.07771	6.1e-09	1.15e-10	1
TMX1	2.05761	6.19e-09	1.17e-10	1
PREPL	2.06398	6.21e-09	1.18e-10	1
MSRB2	2.06654	6.27e-09	1.19e-10	1
METTL13	2.06398	6.37e-09	1.21e-10	1
PWWP2A	2.05592	6.38e-09	1.21e-10	1
FBXW2	2.06911	6.55e-09	1.25e-10	1
NUP37	2.05255	6.61e-09	1.26e-10	1
RNASE2	2.05255	6.9e-09	1.32e-10	1
WWP2	2.05634	7.04e-09	1.35e-10	1
RAC2	2.06228	7.04e-09	1.35e-10	1
HMGN4	2.06186	7.16e-09	1.38e-10	1
VCAN	2.07641	7.31e-09	1.41e-10	1
C5orf51	2.05044	7.31e-09	1.41e-10	1
CTSC	2.05465	7.4e-09	1.43e-10	1
RAD51C	2.05804	7.42e-09	1.44e-10	1
DARS1	2.0517	7.43e-09	1.44e-10	1
CD72	2.0517	7.5e-09	1.46e-10	1
ARSD	2.04499	7.63e-09	1.48e-10	1
KIAA1143	2.04207	7.91e-09	1.54e-10	1
SEPTIN10	2.06356	7.92e-09	1.55e-10	1
MX2	2.0903	7.92e-09	1.55e-10	1
TMOD3	2.06016	7.93e-09	1.55e-10	1
HOOK3	2.06101	8.22e-09	1.62e-10	1
AHSA1	2.05297	8.26e-09	1.63e-10	1
MRM2	2.04082	8.27e-09	1.63e-10	1
BRCC3	2.04583	8.29e-09	1.64e-10	1
BRD3OS	2.0517	8.43e-09	1.67e-10	1
GPR27	1.9558	8.59e-09	1.7e-10	1
TXLNA	2.0496	8.91e-09	1.77e-10	1
KRBOX5	2.04625	8.99e-09	1.79e-10	1
HVCN1	2.04457	9.01e-09	1.79e-10	1
COG6	2.00602	9.01e-09	1.79e-10	1
RUVBL1	2.05719	9.22e-09	1.84e-10	1
RNF13	2.06654	9.22e-09	1.84e-10	1
TTL	2.05592	9.24e-09	1.85e-10	1
AK2	2.04415	9.56e-09	1.92e-10	1
F2RL1	2.04792	9.63e-09	1.93e-10	1
CPOX	2.03542	1e-08	2.02e-10	1
PCTP	2.03211	1.03e-08	2.09e-10	1
AHCYL1	2.04332	1.03e-08	2.08e-10	1
CCDC126	2.03749	1.04e-08	2.11e-10	1
FARSA	2.03376	1.04e-08	2.12e-10	1
IGKV4-1	2.0247	1.04e-08	2.1e-10	1
PTER	2.04499	1.09e-08	2.21e-10	1
LYZ	1.78923	1.1e-08	2.24e-10	1
NUDT9	2.03211	1.11e-08	2.26e-10	1
LNPK	2.02799	1.12e-08	2.29e-10	1
ERCC4	2.0404	1.17e-08	2.4e-10	1
ERVK3-1	2.01248	1.21e-08	2.49e-10	1
LAMP2	2.01126	1.21e-08	2.49e-10	1
FZD2	2.03128	1.22e-08	2.52e-10	1
PSMB9	2.03998	1.36e-08	2.82e-10	1
NDUFB3	2.02224	1.42e-08	2.95e-10	1
CYBB	2.00562	1.45e-08	3.03e-10	1
RPP40	2.03004	1.46e-08	3.05e-10	1
TRPV2	2.02347	1.48e-08	3.08e-10	1
STAP1	2.01572	1.52e-08	3.18e-10	1
CCT5	2.0202	1.54e-08	3.24e-10	1
S100A11	2.01207	1.54e-08	3.23e-10	1
CDC42EP3	1.98886	1.66e-08	3.5e-10	1
EXOSC3	2.02184	1.66e-08	3.51e-10	1
PIGK	2.01572	1.67e-08	3.54e-10	1
GBP3	2.00884	1.71e-08	3.62e-10	1
PHAX	1.95274	1.73e-08	3.67e-10	1
DAXX	2.00682	1.74e-08	3.68e-10	1
SLC66A3	2.01613	1.74e-08	3.69e-10	1
GCSH	2.01167	1.79e-08	3.81e-10	1
EBNA1BP2	2.03542	1.8e-08	3.82e-10	1
USP28	1.98807	1.84e-08	3.92e-10	1
NAGA	2.01613	1.87e-08	3.99e-10	1
SLC25A43	2.02388	1.89e-08	4.05e-10	1
NAPSB	1.98334	1.9e-08	4.06e-10	1
SIGLEC10	1.98886	1.92e-08	4.11e-10	1
AGMAT	2	1.98e-08	4.26e-10	1
FRAT2	2.0016	1.99e-08	4.3e-10	1
COPZ1	2.00763	1.99e-08	4.3e-10	1
ECI2	2.00321	2.05e-08	4.44e-10	1
MDFIC	2.01369	2.06e-08	4.48e-10	1
UNC93B1	2.00521	2.12e-08	4.61e-10	1
GPALPP1	2.00602	2.12e-08	4.62e-10	1
PTCH1	1.96232	2.14e-08	4.67e-10	1
NEK7	1.9976	2.14e-08	4.68e-10	1
PYCARD	1.9992	2.16e-08	4.73e-10	1
ITGA4	2.00844	2.18e-08	4.77e-10	1
YWHAB	2.00562	2.22e-08	4.87e-10	1
CMTR2	1.9425	2.26e-08	4.97e-10	1
LILRB4	1.97941	2.27e-08	4.99e-10	1
BTBD7	1.9988	2.28e-08	5.02e-10	1
PRDX1	1.99362	2.39e-08	5.27e-10	1
OGFRL1	2.00441	2.46e-08	5.43e-10	1
CORO1A	2.00844	2.47e-08	5.46e-10	1
SMC2	2	2.47e-08	5.45e-10	1
RNF135	1.99521	2.48e-08	5.49e-10	1
FGD3	1.98926	2.53e-08	5.62e-10	1
ESYT1	2.00965	2.54e-08	5.65e-10	1
SPOP	1.97981	2.57e-08	5.72e-10	1
C11orf54	1.99164	2.57e-08	5.71e-10	1
ZNF148	1.98216	2.61e-08	5.82e-10	1
PSMD10	1.9857	2.68e-08	6e-10	1
ATP6V1B2	1.97941	2.68e-08	6e-10	1
ACOT13	1.99243	2.72e-08	6.1e-10	1
FAM98B	1.91791	2.73e-08	6.12e-10	1
SRD5A1	1.99601	2.76e-08	6.21e-10	1
ZNF512	2.0012	2.77e-08	6.22e-10	1
OSCAR	1.99005	2.83e-08	6.4e-10	1
ABRACL	1.98886	2.85e-08	6.44e-10	1
RASSF4	1.998	2.86e-08	6.47e-10	1
SNHG30	1.99481	3.11e-08	7.06e-10	1
MGME1	1.98965	3.12e-08	7.08e-10	1
UEVLD	1.9861	3.19e-08	7.28e-10	1
MS4A1	1.90585	3.19e-08	7.28e-10	1
ZNF490	1.98452	3.2e-08	7.32e-10	1
IL6R	1.98138	3.2e-08	7.33e-10	1
PDCD6IP	1.9988	3.23e-08	7.4e-10	1
SDHD	1.98098	3.27e-08	7.5e-10	1
JAML	1.97044	3.41e-08	7.85e-10	1
FANCF	1.98689	3.43e-08	7.89e-10	1
SLC25A20	1.98216	3.44e-08	7.94e-10	1
PREB	1.97628	3.5e-08	8.08e-10	1
CNPY2	1.9857	3.58e-08	8.3e-10	1
CRLS1	1.98177	3.58e-08	8.3e-10	1
ATMIN	1.98177	3.58e-08	8.31e-10	1
POP5	1.99124	3.59e-08	8.35e-10	1
GPBP1	1.96271	3.6e-08	8.37e-10	1
GPR34	1.96696	3.82e-08	8.89e-10	1
GOLGA5	1.97511	3.86e-08	9e-10	1
CARD16	1.98847	3.86e-08	9.02e-10	1
PPP1R11	1.97161	3.86e-08	9.02e-10	1
SMARCAL1	1.98334	3.94e-08	9.22e-10	1
IGKC	1.96309	4.05e-08	9.51e-10	1
SOAT1	1.99005	4.1e-08	9.64e-10	1
CDK4	1.9685	4.2e-08	9.89e-10	1
OGFOD1	1.97044	4.24e-08	9.99e-10	1
OPTN	1.99045	4.34e-08	1.02e-09	1
CD40	1.97278	4.38e-08	1.04e-09	1
CD163	1.96464	4.42e-08	1.05e-09	1
CEBPA	1.96618	4.62e-08	1.1e-09	1
NT5DC1	1.95886	4.7e-08	1.12e-09	1
CHST11	1.96232	4.76e-08	1.13e-09	1
CBR1	1.97511	4.81e-08	1.15e-09	1
POLD3	1.96155	4.82e-08	1.15e-09	1
KBTBD7	1.96502	4.98e-08	1.19e-09	1
NUP62	1.97044	5.03e-08	1.2e-09	1
TRIP4	1.95848	5.04e-08	1.21e-09	1
ANAPC10	1.9658	5.12e-08	1.23e-09	1
PRKD2	1.91388	5.16e-08	1.24e-09	1
HIBADH	1.96117	5.17e-08	1.25e-09	1
ATP23	1.96117	5.17e-08	1.25e-09	1
CSTF3	1.96541	5.39e-08	1.3e-09	1
PBRM1	1.9558	5.47e-08	1.32e-09	1
ZNF140	1.96464	5.5e-08	1.33e-09	1
ZNF106	1.95122	5.7e-08	1.38e-09	1
MRPL20	1.95733	5.77e-08	1.4e-09	1
DCAF10	1.95122	5.94e-08	1.45e-09	1
GNPDA1	1.95427	6.28e-08	1.53e-09	1
AATBC	1.94175	6.3e-08	1.54e-09	1
IGKV1OR2-108	1.9497	6.33e-08	1.55e-09	1
PVRIG	1.94856	6.48e-08	1.59e-09	1
TRDV3	1.87512	6.5e-08	1.6e-09	1
UFSP2	1.96078	6.55e-08	1.61e-09	1
RAB3D	1.94704	6.59e-08	1.62e-09	1
COA4	1.95351	6.64e-08	1.64e-09	1
ATP2B4	1.92641	6.66e-08	1.64e-09	1
ABAT	1.90006	6.67e-08	1.65e-09	1
CPNE3	1.94894	6.74e-08	1.67e-09	1
UBE2L6	1.95963	6.78e-08	1.68e-09	1
PSD4	1.95503	6.97e-08	1.74e-09	1
ITGB1BP1	1.95236	6.97e-08	1.73e-09	1
GCNT2	1.95122	7.01e-08	1.75e-09	1
TCFL5	1.92197	7.11e-08	1.78e-09	1
RPUSD3	1.95886	7.12e-08	1.78e-09	1
METTL5	1.96386	7.12e-08	1.78e-09	1
SLC25A24	1.95465	7.12e-08	1.78e-09	1
FIG4	1.95656	7.39e-08	1.85e-09	1
FASTKD1	1.94326	7.41e-08	1.86e-09	1
USP18	2.01248	7.5e-08	1.89e-09	1
WARS2-AS1	1.9516	7.65e-08	1.93e-09	1
DYNLRB1	1.93536	7.89e-08	1.99e-09	1
PAWR	1.93798	7.9e-08	1.99e-09	1
PDHX	1.95313	7.94e-08	2e-09	1
SCLT1	1.94515	8.03e-08	2.03e-09	1
GM2A	1.91755	8.59e-08	2.18e-09	1
TIMM8B	1.93311	8.75e-08	2.22e-09	1
ROCK2	1.93648	8.87e-08	2.26e-09	1
LCK	1.94401	9.12e-08	2.33e-09	1
XIAP	1.94932	9.51e-08	2.43e-09	1
RCBTB1	1.94894	9.51e-08	2.43e-09	1
GLRX3	1.90331	9.51e-08	2.44e-09	1
CLPX	1.93349	9.53e-08	2.44e-09	1
ZNF407-AS1	1.93013	9.6e-08	2.47e-09	1
TMEM209	1.91718	9.66e-08	2.49e-09	1
IGLV3-10	1.93237	9.89e-08	2.55e-09	1
TYMP	1.90658	9.94e-08	2.57e-09	1
SNAPIN	1.93424	1.02e-07	2.63e-09	1
HDAC1	1.92827	1.03e-07	2.67e-09	1
SPATS2L	1.9516	1.06e-07	2.77e-09	1
ARHGAP19	1.93424	1.06e-07	2.76e-09	1
PAK1	1.92345	1.06e-07	2.76e-09	1
PEX11B	1.93498	1.06e-07	2.77e-09	1
MICAL2	1.93798	1.08e-07	2.82e-09	1
CHST15	1.92271	1.08e-07	2.81e-09	1
INPP4B	1.88786	1.14e-07	2.98e-09	1
IL16	1.93611	1.17e-07	3.07e-09	1
ADAM10	1.91975	1.18e-07	3.1e-09	1
TMCO3	1.93013	1.18e-07	3.11e-09	1
CNOT1	1.92641	1.22e-07	3.23e-09	1
FBXO6	1.89143	1.23e-07	3.26e-09	1
SFT2D1	1.91902	1.23e-07	3.24e-09	1
SLC4A1AP	1.92012	1.25e-07	3.31e-09	1
PLSCR1	1.93761	1.26e-07	3.33e-09	1
NNT	1.91791	1.27e-07	3.38e-09	1
CHURC1	1.79791	1.27e-07	3.37e-09	1
SLC43A3	1.91131	1.28e-07	3.4e-09	1
HSDL2	1.90295	1.29e-07	3.44e-09	1
ANKRD46	1.91718	1.3e-07	3.48e-09	1
CTDSP2	1.91424	1.32e-07	3.55e-09	1
MCTS1	1.92419	1.32e-07	3.54e-09	1
NFE2	1.89717	1.32e-07	3.53e-09	1
MRFAP1L1	1.89897	1.33e-07	3.57e-09	1
TCAIM	1.92271	1.33e-07	3.56e-09	1
HSBP1	1.91718	1.34e-07	3.62e-09	1
CSK	1.91351	1.34e-07	3.6e-09	1
FCMR	1.91939	1.34e-07	3.61e-09	1
RIDA	1.92234	1.37e-07	3.7e-09	1
PCNA	1.90949	1.38e-07	3.73e-09	1
CDCA7L	1.88076	1.4e-07	3.78e-09	1
LILRA2	1.90621	1.41e-07	3.82e-09	1
NCAPD2	1.91791	1.41e-07	3.83e-09	1
CKMT2-AS1	1.89789	1.43e-07	3.88e-09	1
ADPRH	1.91902	1.43e-07	3.89e-09	1
TLR1	1.89861	1.45e-07	3.94e-09	1
C1orf162	1.91791	1.45e-07	3.95e-09	1
HSD17B12	1.91608	1.45e-07	3.95e-09	1
PAPOLG	1.90404	1.45e-07	3.94e-09	1
EFL1	1.91534	1.49e-07	4.08e-09	1
TRIM22	1.92901	1.52e-07	4.15e-09	1
RGS14	1.91168	1.53e-07	4.21e-09	1
BCL2	1.92678	1.54e-07	4.23e-09	1
MRPL1	1.91534	1.54e-07	4.23e-09	1
CREB5	1.83959	1.55e-07	4.25e-09	1
TMEM167A	1.90767	1.57e-07	4.31e-09	1
LIN37	1.90367	1.59e-07	4.37e-09	1
GGPS1	1.90803	1.61e-07	4.44e-09	1
NMI	1.91534	1.64e-07	4.53e-09	1
TNS3	1.90621	1.7e-07	4.7e-09	1
MVB12A	1.91058	1.7e-07	4.72e-09	1
ZMPSTE24	1.90658	1.71e-07	4.75e-09	1
ZNF75D	1.90876	1.71e-07	4.76e-09	1
NEXN	1.88005	1.74e-07	4.84e-09	1
STAT6	1.91022	1.74e-07	4.83e-09	1
LILRA3	1.89609	1.75e-07	4.87e-09	1
WDR3	1.89825	1.77e-07	4.96e-09	1
PRIM1	1.90658	1.77e-07	4.96e-09	1
MRPL27	1.90367	1.78e-07	4.99e-09	1
ARL5A	1.90985	1.8e-07	5.03e-09	1
DNAH3	1.86881	1.81e-07	5.07e-09	1
POP7	1.90512	1.81e-07	5.08e-09	1
LAPTM4B	1.87899	1.81e-07	5.07e-09	1
DAAM1	1.86672	1.83e-07	5.15e-09	1
FAM126A	1.89573	1.87e-07	5.27e-09	1
RAB7A	1.90476	1.89e-07	5.33e-09	1
SNTB2	1.88182	1.9e-07	5.36e-09	1
C3AR1	1.81028	1.92e-07	5.43e-09	1
KDM1B	1.9044	1.92e-07	5.43e-09	1
MED16	1.89573	1.92e-07	5.42e-09	1
RRP1B	1.9073	1.97e-07	5.58e-09	1
VBP1	1.89825	2.02e-07	5.74e-09	1
NIPSNAP3A	1.90621	2.08e-07	5.91e-09	1
FAM241A	1.89897	2.1e-07	5.99e-09	1
FH	1.91095	2.11e-07	6.02e-09	1
SLC24A4	1.90331	2.13e-07	6.1e-09	1
TTC1	1.89934	2.16e-07	6.2e-09	1
RXRA	1.9015	2.23e-07	6.42e-09	1
SF3B3	1.89179	2.23e-07	6.41e-09	1
HADH	1.90006	2.23e-07	6.42e-09	1
DNAJB6	1.89072	2.26e-07	6.52e-09	1
DCAF13	1.89394	2.29e-07	6.63e-09	1
TBC1D1	1.89358	2.31e-07	6.67e-09	1
TMEM60	1.89394	2.32e-07	6.73e-09	1
NCOR1	1.88929	2.32e-07	6.7e-09	1
HIPK3	1.88218	2.33e-07	6.77e-09	1
IGLV2-14	1.89251	2.34e-07	6.82e-09	1
HK3	1.89251	2.34e-07	6.81e-09	1
FGR	1.8843	2.42e-07	7.08e-09	1
KLHL6	1.83824	2.42e-07	7.06e-09	1
RPS6KA1	1.89286	2.42e-07	7.05e-09	1
FGD4	1.80083	2.47e-07	7.22e-09	1
GSPT2	1.88715	2.48e-07	7.25e-09	1
DGUOK	1.89789	2.5e-07	7.33e-09	1
ISOC1	1.89286	2.5e-07	7.32e-09	1
VPS33A	1.88857	2.57e-07	7.55e-09	1
TIMP2	1.88537	2.59e-07	7.6e-09	1
GEMIN6	1.8875	2.64e-07	7.78e-09	1
EIF4E2	1.8843	2.64e-07	7.76e-09	1
ATP6V0E1	1.89286	2.69e-07	7.94e-09	1
GEMIN5	1.88893	2.74e-07	8.08e-09	1
LFNG	1.88395	2.86e-07	8.47e-09	1
MYOM2	1.74611	2.88e-07	8.53e-09	1
PLA2G7	1.78795	2.9e-07	8.61e-09	1
UTP3	1.88573	3.14e-07	9.33e-09	1
IFI44L	1.65618	3.23e-07	9.62e-09	1
CD300A	1.89072	3.24e-07	9.67e-09	1
RTP4	1.89215	3.27e-07	9.77e-09	1
CNOT6	1.88466	3.29e-07	9.82e-09	1
NNT-AS1	1.87021	3.33e-07	9.96e-09	1
LILRB2	1.87864	3.34e-07	9.99e-09	1
SNAPC5	1.87196	3.34e-07	1e-08	1
ACYP1	1.88147	3.43e-07	1.03e-08	1
SFR1	1.87688	3.45e-07	1.04e-08	1
NOC3L	1.84706	3.65e-07	1.1e-08	1
SKP2	1.88005	3.66e-07	1.11e-08	1
CNDP2	1.88537	3.68e-07	1.11e-08	1
C3orf14	1.86916	3.72e-07	1.13e-08	1
KLHDC7B	1.87021	3.74e-07	1.13e-08	1
FAM217B	1.85632	3.84e-07	1.17e-08	1
SLC30A6	1.87021	3.92e-07	1.19e-08	1
SORD	1.88964	3.97e-07	1.21e-08	1
SLC7A7	1.86463	3.98e-07	1.21e-08	1
AP3M1	1.87091	4e-07	1.22e-08	1
PAX8-AS1	1.69549	4.14e-07	1.27e-08	1
WDR7	1.86498	4.17e-07	1.28e-08	1
SDAD1	1.86776	4.17e-07	1.28e-08	1
CFAP97	1.87477	4.17e-07	1.28e-08	1
SNX17	1.86741	4.25e-07	1.31e-08	1
EXT2	1.87266	4.26e-07	1.31e-08	1
ATP9B	1.86532	4.48e-07	1.38e-08	1
TNFAIP8	1.85563	4.53e-07	1.4e-08	1
ALG8	1.87477	4.55e-07	1.41e-08	1
UNG	1.85598	4.56e-07	1.41e-08	1
PDE6D	1.87582	4.62e-07	1.43e-08	1
HLA-DQA1	1.0322	4.67e-07	1.45e-08	1
CENPK	1.53894	4.68e-07	1.45e-08	1
BPNT1	1.86741	4.76e-07	1.48e-08	1
VPS50	1.87196	4.77e-07	1.48e-08	1
TMEM250	1.86081	4.77e-07	1.48e-08	1
NDUFC1	1.85529	4.92e-07	1.53e-08	1
LSM6	1.85598	4.92e-07	1.53e-08	1
SDHC	1.85874	4.97e-07	1.55e-08	1
ACLY	1.87336	5e-07	1.56e-08	1
STK3	1.86567	5.02e-07	1.57e-08	1
IGK	1.8457	5.02e-07	1.57e-08	1
RNASE4	1.84877	5.03e-07	1.57e-08	1
TET2	1.85839	5.03e-07	1.57e-08	1
IGLJ3	1.86428	5.07e-07	1.59e-08	1
KLHL9	1.86012	5.15e-07	1.62e-08	1
SLC46A3	1.85494	5.3e-07	1.67e-08	1
FOLR3	1.77274	5.38e-07	1.7e-08	1
NUP42	1.85943	5.41e-07	1.71e-08	1
RAB29	1.85254	5.43e-07	1.72e-08	1
ELP4	1.85357	5.45e-07	1.72e-08	1
PDE4DIP	1.85151	5.51e-07	1.74e-08	1
CBL	1.85151	5.52e-07	1.75e-08	1
PRMT6	1.84366	5.53e-07	1.75e-08	1
HLTF	1.82782	5.62e-07	1.79e-08	1
EMC2	1.84604	5.62e-07	1.79e-08	1
NUDT5	1.84638	5.62e-07	1.78e-08	1
COA6	1.85219	5.79e-07	1.85e-08	1
MAPK1	1.85805	5.79e-07	1.85e-08	1
TRAV23DV6	1.78476	5.83e-07	1.87e-08	1
SNUPN	1.85736	5.9e-07	1.89e-08	1
CTR9	1.8546	5.91e-07	1.9e-08	1
C12orf4	1.85529	5.98e-07	1.92e-08	1
FKBP15	1.85219	5.99e-07	1.92e-08	1
IMMP1L	1.84434	5.99e-07	1.92e-08	1
HDAC9	1.83688	6.1e-07	1.97e-08	1
AKAP7	1.85185	6.11e-07	1.97e-08	1
CACNA2D3	1.82116	6.14e-07	1.98e-08	1
GLE1	1.84672	6.14e-07	1.98e-08	1
RUVBL2	1.85254	6.15e-07	1.99e-08	1
OGDH	1.85529	6.26e-07	2.03e-08	1
DDX60L	1.84911	6.26e-07	2.02e-08	1
UBASH3B	1.8498	6.37e-07	2.07e-08	1
DPAGT1	1.86012	6.4e-07	2.08e-08	1
FBLN5	1.8423	6.55e-07	2.13e-08	1
CDIPT	1.84877	6.58e-07	2.14e-08	1
C1QBP	1.87652	6.61e-07	2.16e-08	1
HCP5	1.80799	6.61e-07	2.16e-08	1
ERCC6L2	1.80897	6.64e-07	2.17e-08	1
SEPHS2	1.84332	6.7e-07	2.19e-08	1
COQ9	1.84672	6.75e-07	2.21e-08	1
CD180	1.85117	6.78e-07	2.22e-08	1
CPM	1.85391	6.85e-07	2.24e-08	1
BRD8	1.83117	6.9e-07	2.26e-08	1
SREK1IP1	1.78955	6.97e-07	2.29e-08	1
BBS10	1.85839	6.99e-07	2.3e-08	1
NFAM1	1.84502	7.01e-07	2.31e-08	1
PMS1	1.81686	7.1e-07	2.34e-08	1
CPPED1	1.82782	7.13e-07	2.35e-08	1
ARHGAP27	1.84128	7.14e-07	2.36e-08	1
NSL1	1.83993	7.19e-07	2.37e-08	1
PILRA	1.81851	7.25e-07	2.4e-08	1
GBP4	1.87231	7.27e-07	2.41e-08	1
PHF23	1.8406	7.28e-07	2.41e-08	1
CRNKL1	1.8406	7.33e-07	2.43e-08	1
CTBP1-DT	1.79662	7.34e-07	2.43e-08	1
NPTN	1.85563	7.44e-07	2.47e-08	1
CALM2	1.83857	7.54e-07	2.51e-08	1
ARL1	1.83959	7.55e-07	2.52e-08	1
PTAFR	1.83385	7.69e-07	2.56e-08	1
ARL14EP	1.82715	7.92e-07	2.65e-08	1
NCF1	1.80832	8.01e-07	2.68e-08	1
SPIB	1.83688	8.03e-07	2.69e-08	1
RCAN1	1.83993	8.04e-07	2.69e-08	1
TM9SF2	1.83722	8.15e-07	2.73e-08	1
NUDT21	1.82548	8.17e-07	2.74e-08	1
GNS	1.82882	8.21e-07	2.76e-08	1
SLC31A1	1.83925	8.33e-07	2.8e-08	1
PSMB8	1.83857	8.35e-07	2.81e-08	1
GTF2A1	1.82983	8.36e-07	2.82e-08	1
CIAO2A	1.84706	8.44e-07	2.85e-08	1
TRIOBP	1.82415	8.48e-07	2.86e-08	1
DIAPH2	1.83959	8.51e-07	2.88e-08	1
TXNDC15	1.83621	8.52e-07	2.88e-08	1
MCMBP	1.83217	8.56e-07	2.9e-08	1
TTC27	1.83554	8.64e-07	2.93e-08	1
SEC63	1.82582	8.7e-07	2.95e-08	1
TRAPPC11	1.77054	8.7e-07	2.95e-08	1
MRPL48	1.844	8.81e-07	2.99e-08	1
C1RL	1.82149	9.05e-07	3.08e-08	1
HDHD5	1.83756	9.13e-07	3.11e-08	1
CLOCK	1.8379	9.38e-07	3.21e-08	1
FCGR2B	1.82183	9.61e-07	3.29e-08	1
TMEM33	1.83117	9.64e-07	3.3e-08	1
SNAPC3	1.83419	9.67e-07	3.31e-08	1
REEP5	1.84332	9.67e-07	3.31e-08	1
NCEH1	1.73853	9.82e-07	3.37e-08	1
MANEA	1.83993	9.83e-07	3.38e-08	1
TSNAX	1.83016	9.85e-07	3.39e-08	1
TMEM14C	1.78731	9.94e-07	3.42e-08	1
PCNX4	1.81488	9.97e-07	3.44e-08	1
TMEM229B	1.82682	1e-06	3.46e-08	1
VPS36	1.8044	1.01e-06	3.51e-08	1
VAMP8	1.82949	1.05e-06	3.63e-08	1
MOB1A	1.81984	1.07e-06	3.72e-08	1
ARL6IP6	1.82349	1.09e-06	3.78e-08	1
ALDH5A1	1.75871	1.1e-06	3.83e-08	1
AKR1C3	1.68663	1.1e-06	3.81e-08	1
KLHL12	1.8205	1.13e-06	3.94e-08	1
TMEM128	1.82415	1.14e-06	3.98e-08	1
EID2	1.83621	1.14e-06	3.98e-08	1
SHMT2	1.81521	1.15e-06	4.01e-08	1
MRPS23	1.82315	1.15e-06	4.03e-08	1
WASHC3	1.82615	1.16e-06	4.05e-08	1
UBA1	1.82282	1.16e-06	4.07e-08	1
MPDU1	1.81653	1.21e-06	4.27e-08	1
NIPAL3	1.81951	1.21e-06	4.26e-08	1
ANKRD17	1.81587	1.25e-06	4.42e-08	1
ABCD3	1.77936	1.28e-06	4.55e-08	1
ZC3H4	1.82315	1.29e-06	4.57e-08	1
TRAPPC1	1.81127	1.3e-06	4.61e-08	1
DNAJA3	1.82116	1.3e-06	4.61e-08	1
CHM	1.81094	1.31e-06	4.66e-08	1
FCRL1	1.74459	1.31e-06	4.67e-08	1
BAZ1A	1.78795	1.31e-06	4.65e-08	1
RALBP1	1.82548	1.34e-06	4.77e-08	1
TRAPPC6B	1.77557	1.35e-06	4.83e-08	1
FBN2	1.79986	1.36e-06	4.85e-08	1
VKORC1L1	1.82083	1.4e-06	5e-08	1
SARS1	1.81192	1.4e-06	5.01e-08	1
NUDT7	1.81984	1.44e-06	5.18e-08	1
C5orf22	1.81192	1.44e-06	5.18e-08	1
PYCR2	1.81752	1.45e-06	5.23e-08	1
TMEM107	1.81127	1.45e-06	5.21e-08	1
ALDH3A2	1.80799	1.46e-06	5.26e-08	1
KDELR2	1.81357	1.46e-06	5.28e-08	1
CCT7	1.81587	1.48e-06	5.37e-08	1
SECTM1	1.80799	1.49e-06	5.37e-08	1
B3GALNT2	1.80897	1.49e-06	5.4e-08	1
TRG-AS1	1.70853	1.49e-06	5.37e-08	1
LDLRAP1	1.81917	1.51e-06	5.46e-08	1
MLEC	1.81127	1.51e-06	5.46e-08	1
SORT1	1.8044	1.53e-06	5.56e-08	1
DNTTIP1	1.78667	1.55e-06	5.63e-08	1
PDCD2	1.81455	1.56e-06	5.69e-08	1
ACTR6	1.81258	1.57e-06	5.71e-08	1
SP1	1.81192	1.58e-06	5.76e-08	1
TIGIT	1.80963	1.58e-06	5.75e-08	1
SNX20	1.80375	1.6e-06	5.85e-08	1
CFP	1.80963	1.6e-06	5.86e-08	1
GMPS	1.80115	1.6e-06	5.86e-08	1
POU2F2	1.73641	1.6e-06	5.85e-08	1
TIAM1	1.81455	1.62e-06	5.95e-08	1
PRR5L	1.79469	1.63e-06	5.97e-08	1
TMX3	1.8005	1.66e-06	6.12e-08	1
ATE1	1.80766	1.67e-06	6.13e-08	1
ISG15	1.83217	1.68e-06	6.17e-08	1
KPNB1	1.77022	1.7e-06	6.28e-08	1
PSMB2	1.8031	1.7e-06	6.26e-08	1
AGPAT3	1.80408	1.75e-06	6.49e-08	1
EIF2S1	1.80213	1.76e-06	6.53e-08	1
PRRC1	1.78508	1.76e-06	6.53e-08	1
MRPL42	1.79565	1.81e-06	6.74e-08	1
NXPE3	1.80115	1.81e-06	6.72e-08	1
PIK3C3	1.79662	1.82e-06	6.77e-08	1
TMEM268	1.79662	1.82e-06	6.75e-08	1
DCPS	1.79824	1.84e-06	6.86e-08	1
CPED1	1.79953	1.84e-06	6.84e-08	1
IL10RB	1.79921	1.85e-06	6.88e-08	1
ACSL6	1.77778	1.87e-06	6.99e-08	1
TBL2	1.79856	1.87e-06	6.99e-08	1
TRUB1	1.78731	1.87e-06	6.99e-08	1
SLAMF6	1.78827	1.9e-06	7.1e-08	1
CPTP	1.82482	1.93e-06	7.23e-08	1
SSR1	1.78827	1.96e-06	7.35e-08	1
ATG5	1.80115	1.99e-06	7.46e-08	1
TMEM14A	1.7963	2.03e-06	7.64e-08	1
TSPAN31	1.78923	2.03e-06	7.63e-08	1
IGHD	1.72325	2.05e-06	7.73e-08	1
DHRS7B	1.79856	2.05e-06	7.71e-08	1
REEP3	1.80018	2.05e-06	7.71e-08	1
MRPL44	1.78508	2.06e-06	7.75e-08	1
EIF4ENIF1	1.80245	2.06e-06	7.79e-08	1
SQOR	1.80245	2.08e-06	7.87e-08	1
NKAPD1	1.79565	2.09e-06	7.87e-08	1
UBASH3A	1.78795	2.13e-06	8.04e-08	1
AKR1A1	1.79437	2.15e-06	8.15e-08	1
UBE3C	1.79211	2.15e-06	8.13e-08	1
ARHGEF3	1.79695	2.16e-06	8.2e-08	1
TOR1B	1.78667	2.28e-06	8.66e-08	1
ZNF33A	1.81061	2.32e-06	8.82e-08	1
MOCS2	1.78891	2.38e-06	9.1e-08	1
CCR5	1.7762	2.38e-06	9.08e-08	1
TMBIM6	1.78923	2.39e-06	9.15e-08	1
ARV1	1.79211	2.41e-06	9.23e-08	1
C12orf29	1.77651	2.43e-06	9.33e-08	1
RGS19	1.79019	2.47e-06	9.48e-08	1
THAP5	1.78476	2.47e-06	9.5e-08	1
TINF2	1.78508	2.5e-06	9.62e-08	1
CDC14B	1.67757	2.5e-06	9.6e-08	1
TRERF1	1.77746	2.53e-06	9.72e-08	1
CCT3	1.78955	2.55e-06	9.81e-08	1
ATP5MF	1.79244	2.58e-06	9.97e-08	1
TMEM50B	1.7838	2.6e-06	1.01e-07	1
IGLV3-25	1.7838	2.62e-06	1.01e-07	1
EHMT2	1.78348	2.63e-06	1.02e-07	1
RRAGA	1.78444	2.64e-06	1.02e-07	1
ERAP2	1.44509	2.67e-06	1.04e-07	1
IGH	1.76336	2.69e-06	1.04e-07	1
TRAFD1	1.78667	2.69e-06	1.04e-07	1
CD24	1.6889	2.71e-06	1.05e-07	1
C1orf21	1.75963	2.72e-06	1.06e-07	1
ABRAXAS1	1.75531	2.72e-06	1.06e-07	1
ENO1	1.7584	2.73e-06	1.06e-07	1
ALG14	1.79083	2.8e-06	1.09e-07	1
IER3IP1	1.78126	2.84e-06	1.11e-07	1
CYB561A3	1.77525	2.85e-06	1.11e-07	1
MSANTD4	1.76866	2.91e-06	1.14e-07	1
FPR3	1.79469	2.92e-06	1.14e-07	1
IPCEF1	1.78031	2.95e-06	1.16e-07	1
SP110	1.78412	2.99e-06	1.17e-07	1
FBXL16	1.76554	3.06e-06	1.2e-07	1
ZNF217	1.73702	3.07e-06	1.21e-07	1
MTCH2	1.78317	3.09e-06	1.22e-07	1
AURKAIP1	1.77778	3.11e-06	1.23e-07	1
MAN1A1	1.78508	3.13e-06	1.23e-07	1
YWHAG	1.7507	3.14e-06	1.24e-07	1
EXOSC1	1.77809	3.17e-06	1.25e-07	1
SH2D1B	1.65235	3.17e-06	1.25e-07	1
ZNF143	1.77873	3.22e-06	1.27e-07	1
HMOX2	1.77999	3.26e-06	1.29e-07	1
NME7	1.78063	3.3e-06	1.31e-07	1
PSMB10	1.77999	3.31e-06	1.31e-07	1
ZNF835	1.76585	3.36e-06	1.33e-07	1
SAMD3	1.72652	3.36e-06	1.33e-07	1
MDM1	1.75346	3.36e-06	1.33e-07	1
PARP11	1.78508	3.38e-06	1.34e-07	1
ASGR1	1.76274	3.39e-06	1.35e-07	1
PRCP	1.78221	3.41e-06	1.36e-07	1
CHMP5	1.77494	3.42e-06	1.36e-07	1
TCF4	1.75623	3.42e-06	1.36e-07	1
DIDO1	1.76647	3.44e-06	1.37e-07	1
TXNDC17	1.77022	3.44e-06	1.37e-07	1
GORASP2	1.77557	3.45e-06	1.38e-07	1
CDC23	1.77117	3.51e-06	1.4e-07	1
STARD3NL	1.76929	3.52e-06	1.41e-07	1
DLAT	1.77368	3.62e-06	1.45e-07	1
YIF1A	1.77557	3.63e-06	1.46e-07	1
SLC38A6	1.76523	3.64e-06	1.46e-07	1
SIGLEC7	1.76491	3.69e-06	1.49e-07	1
SCYL3	1.7671	3.76e-06	1.52e-07	1
LIG4	1.74246	3.84e-06	1.55e-07	1
TMEM218	1.76929	3.86e-06	1.56e-07	1
SLAMF8	1.77873	3.95e-06	1.6e-07	1
AGPS	1.76741	3.99e-06	1.62e-07	1
TEP1	1.75685	4.04e-06	1.64e-07	1
DNAL4	1.7854	4.05e-06	1.65e-07	1
APTX	1.76429	4.19e-06	1.71e-07	1
BTK	1.76616	4.25e-06	1.73e-07	1
GMPR2	1.75994	4.26e-06	1.74e-07	1
CLEC10A	1.75778	4.27e-06	1.75e-07	1
DMAC1	1.76118	4.44e-06	1.83e-07	1
BORCS8	1.76274	4.45e-06	1.83e-07	1
APPL1	1.76243	4.46e-06	1.83e-07	1
MRPL40	1.75932	4.54e-06	1.87e-07	1
GID4	1.76211	4.54e-06	1.87e-07	1
NLK	1.73611	4.59e-06	1.89e-07	1
PLXNC1	1.76211	4.6e-06	1.9e-07	1
SNX10	1.75809	4.63e-06	1.92e-07	1
FTO	1.76087	4.66e-06	1.93e-07	1
GTPBP2	1.76336	4.68e-06	1.94e-07	1
ACSL5	1.7646	4.72e-06	1.95e-07	1
MAPKAP1	1.74856	4.86e-06	2.02e-07	1
SRP72	1.76274	4.88e-06	2.03e-07	1
RSBN1	1.71468	4.89e-06	2.04e-07	1
DAPK1	1.75963	4.93e-06	2.05e-07	1
AASDH	1.75932	4.93e-06	2.06e-07	1
CR2	1.74978	4.98e-06	2.08e-07	1
HACD2	1.76056	4.98e-06	2.08e-07	1
ERLIN2	1.7584	4.98e-06	2.08e-07	1
PALLD	1.72087	5.01e-06	2.09e-07	1
NECAP2	1.75562	5.01e-06	2.09e-07	1
CORO1B	1.74703	5.07e-06	2.12e-07	1
CAP1	1.75963	5.12e-06	2.14e-07	1
SPOUT1	1.76305	5.16e-06	2.17e-07	1
ALAD	1.75932	5.18e-06	2.18e-07	1
TMBIM4	1.7584	5.2e-06	2.19e-07	1
TAF12	1.75685	5.24e-06	2.21e-07	1
EXOC2	1.76305	5.29e-06	2.23e-07	1
AGPAT5	1.70271	5.29e-06	2.23e-07	1
GPBAR1	1.74917	5.3e-06	2.24e-07	1
GMDS	1.76118	5.39e-06	2.28e-07	1
NMRAL1	1.75747	5.43e-06	2.3e-07	1
DNAAF10	1.74917	5.61e-06	2.38e-07	1
SRI	1.75901	5.63e-06	2.39e-07	1
TRAV13-1	1.74338	5.64e-06	2.4e-07	1
IRF7	1.76336	5.65e-06	2.4e-07	1
BST2	1.75963	5.7e-06	2.42e-07	1
QDPR	1.74216	5.72e-06	2.43e-07	1
HPS5	1.73762	5.72e-06	2.43e-07	1
C17orf80	1.75377	5.79e-06	2.47e-07	1
GADD45GIP1	1.74917	5.82e-06	2.48e-07	1
C4orf3	1.75654	5.84e-06	2.49e-07	1
CD8B	1.6975	5.94e-06	2.54e-07	1
EDEM3	1.72891	6.12e-06	2.62e-07	1
IL7R	1.68947	6.13e-06	2.62e-07	1
TMEM203	1.74368	6.2e-06	2.66e-07	1
STAT2	1.75009	6.56e-06	2.81e-07	1
MDH1	1.74551	6.57e-06	2.82e-07	1
CNP	1.74978	6.58e-06	2.83e-07	1
ZNRF2	1.74917	6.67e-06	2.87e-07	1
TRPS1	1.70068	6.7e-06	2.88e-07	1
ATIC	1.74277	6.72e-06	2.89e-07	1
MED8	1.74216	6.77e-06	2.92e-07	1
PRELID1	1.74581	6.88e-06	2.97e-07	1
SIDT2	1.74034	6.89e-06	2.98e-07	1
BLCAP	1.7507	6.9e-06	2.98e-07	1
SPAG16	1.73853	6.91e-06	2.98e-07	1
ATPAF1	1.74795	6.94e-06	3e-07	1
FAM200B	1.74795	6.96e-06	3.01e-07	1
TMEM248	1.74948	7.05e-06	3.05e-07	1
PCK2	1.74429	7.13e-06	3.09e-07	1
TRIM68	1.74064	7.17e-06	3.11e-07	1
FAIM	1.74125	7.18e-06	3.12e-07	1
CTSZ	1.67588	7.2e-06	3.13e-07	1
RAB22A	1.74095	7.43e-06	3.24e-07	1
RMND1	1.73702	7.46e-06	3.25e-07	1
N4BP2L1	1.72533	7.56e-06	3.3e-07	1
SNX6	1.73732	7.61e-06	3.32e-07	1
SERBP1	1.74246	7.61e-06	3.33e-07	1
FCRL2	1.72473	7.62e-06	3.33e-07	1
AFTPH	1.74125	7.62e-06	3.33e-07	1
TPGS2	1.7188	7.65e-06	3.35e-07	1
NSMCE4A	1.74429	7.65e-06	3.35e-07	1
PSMA4	1.74459	7.66e-06	3.36e-07	1
TET3	1.74459	7.81e-06	3.43e-07	1
CD300LF	1.7304	7.83e-06	3.44e-07	1
DFFB	1.71321	7.85e-06	3.45e-07	1
HAL	1.69062	7.92e-06	3.48e-07	1
UQCC2	1.74246	8.1e-06	3.57e-07	1
SACS	1.71057	8.11e-06	3.58e-07	1
MRPS6	1.73853	8.23e-06	3.63e-07	1
MRPL52	1.73762	8.27e-06	3.65e-07	1
BAG4	1.7334	8.32e-06	3.68e-07	1
FMO5	1.74095	8.45e-06	3.74e-07	1
PAPSS1	1.73461	8.49e-06	3.76e-07	1
NOL12	1.73641	8.49e-06	3.76e-07	1
TMEM260	1.62628	8.57e-06	3.81e-07	1
MAML3	1.7331	8.68e-06	3.86e-07	1
TBC1D31	1.72147	8.71e-06	3.87e-07	1
C21orf91	1.7135	8.74e-06	3.89e-07	1
UBR7	1.7322	8.76e-06	3.9e-07	1
EPPIN	1.74581	8.79e-06	3.92e-07	1
PAICS	1.70039	8.79e-06	3.92e-07	1
HMG20A	1.72265	8.85e-06	3.95e-07	1
TMEM241	1.71233	8.87e-06	3.96e-07	1
CHMP4A	1.74246	8.95e-06	4e-07	1
COMT	1.72325	8.97e-06	4.01e-07	1
WDSUB1	1.70648	9.01e-06	4.03e-07	1
BET1	1.731	9.02e-06	4.04e-07	1
AP1S2	1.7298	9.07e-06	4.06e-07	1
DNAJC14	1.7298	9.27e-06	4.16e-07	1
MSH6	1.72682	9.28e-06	4.16e-07	1
AGL	1.70532	9.44e-06	4.24e-07	1
GNG7	1.72682	9.46e-06	4.25e-07	1
WDR18	1.73671	9.52e-06	4.28e-07	1
SCYL2	1.7316	9.52e-06	4.28e-07	1
ARL6IP5	1.71939	9.61e-06	4.33e-07	1
SIGLEC1	1.82083	9.67e-06	4.36e-07	1
TM9SF4	1.72533	9.68e-06	4.37e-07	1
PM20D2	1.71204	9.69e-06	4.37e-07	1
SPECC1	1.7188	9.75e-06	4.4e-07	1
INTS8	1.72325	9.76e-06	4.41e-07	1
GSKIP	1.7135	1e-05	4.53e-07	1
NDUFS2	1.72354	1.01e-05	4.57e-07	1
HAT1	1.72236	1.01e-05	4.58e-07	1
IGHG1	1.72712	1.01e-05	4.55e-07	1
IARS2	1.73943	1.02e-05	4.61e-07	1
ARHGAP35	1.72384	1.03e-05	4.69e-07	1
PSME3	1.72354	1.03e-05	4.65e-07	1
SHISA5	1.72682	1.07e-05	4.88e-07	1
NID1	1.62893	1.09e-05	4.97e-07	1
GRK6	1.72533	1.1e-05	5.01e-07	1
SLC38A10	1.72741	1.1e-05	5.04e-07	1
RRAS	1.70853	1.11e-05	5.07e-07	1
LGALS3BP	1.70039	1.12e-05	5.13e-07	1
DEGS1	1.71615	1.13e-05	5.17e-07	1
MBLAC2	1.70155	1.14e-05	5.26e-07	1
POLR2D	1.71644	1.15e-05	5.29e-07	1
ZADH2	1.7191	1.16e-05	5.36e-07	1
ATG7	1.71969	1.16e-05	5.35e-07	1
FLJ32255	1.71585	1.16e-05	5.34e-07	1
CD2	1.71174	1.17e-05	5.4e-07	1
TAX1BP1	1.72652	1.18e-05	5.43e-07	1
TSPAN2	1.70503	1.18e-05	5.45e-07	1
RP2	1.71468	1.19e-05	5.48e-07	1
TBCEL	1.71086	1.19e-05	5.51e-07	1
ERI2	1.71792	1.2e-05	5.55e-07	1
CACYBP	1.71644	1.22e-05	5.65e-07	1
BANK1	1.68976	1.23e-05	5.73e-07	1
NOTCH2	1.72354	1.24e-05	5.76e-07	1
HCCS	1.68776	1.24e-05	5.77e-07	1
TBCE	1.72058	1.25e-05	5.82e-07	1
BMP2K	1.69176	1.27e-05	5.92e-07	1
RFC2	1.71792	1.28e-05	5.96e-07	1
TPPP3	1.71939	1.28e-05	5.97e-07	1
AP1M1	1.71057	1.29e-05	6.01e-07	1
MVP	1.72533	1.29e-05	6.01e-07	1
TRAC	1.69463	1.29e-05	6e-07	1
ZNF232	1.72652	1.31e-05	6.13e-07	1
TM9SF1	1.71851	1.32e-05	6.18e-07	1
PLCB1	1.69377	1.32e-05	6.17e-07	1
LMNB1	1.71145	1.32e-05	6.19e-07	1
TMEM65	1.70999	1.33e-05	6.21e-07	1
SPG11	1.70184	1.34e-05	6.3e-07	1
LARP1	1.71262	1.34e-05	6.29e-07	1
FCER1G	1.70242	1.35e-05	6.32e-07	1
MAN1C1	1.69463	1.35e-05	6.33e-07	1
PPP1CA	1.72087	1.36e-05	6.38e-07	1
UBL7	1.71644	1.36e-05	6.42e-07	1
DIS3L	1.70126	1.36e-05	6.37e-07	1
KLRD1	1.69463	1.37e-05	6.44e-07	1
FLOT2	1.70736	1.38e-05	6.5e-07	1
LINC00847	1.71028	1.39e-05	6.54e-07	1
YIPF4	1.72236	1.39e-05	6.57e-07	1
NFE2L3	1.71851	1.4e-05	6.61e-07	1
CIAPIN1	1.70969	1.41e-05	6.69e-07	1
SIGMAR1	1.71116	1.41e-05	6.69e-07	1
SERPINI1	1.71057	1.43e-05	6.76e-07	1
CBLL1	1.71174	1.44e-05	6.81e-07	1
SLC52A2	1.71762	1.44e-05	6.84e-07	1
RPS27L	1.71145	1.44e-05	6.85e-07	1
VARS1	1.7138	1.46e-05	6.93e-07	1
FKBP4	1.71321	1.46e-05	6.94e-07	1
C19orf25	1.70999	1.46e-05	6.91e-07	1
CPNE5	1.68464	1.47e-05	6.99e-07	1
FAM220A	1.70794	1.48e-05	7.06e-07	1
SERINC3	1.70532	1.5e-05	7.13e-07	1
VIPAS39	1.70619	1.51e-05	7.22e-07	1
NDUFV3	1.70648	1.53e-05	7.31e-07	1
NUP43	1.64853	1.58e-05	7.53e-07	1
PPP1R7	1.70853	1.58e-05	7.58e-07	1
ZFP62	1.68464	1.6e-05	7.64e-07	1
YIPF3	1.70503	1.62e-05	7.79e-07	1
POLR1G	1.70329	1.62e-05	7.78e-07	1
GBAP1	1.70329	1.63e-05	7.81e-07	1
ALOX5	1.68663	1.63e-05	7.84e-07	1
GOLPH3	1.69866	1.64e-05	7.9e-07	1
GPN3	1.71028	1.64e-05	7.92e-07	1
MED11	1.70532	1.64e-05	7.92e-07	1
SCP2	1.71674	1.66e-05	8e-07	1
ARF3	1.70648	1.66e-05	8.01e-07	1
FTSJ3	1.70532	1.68e-05	8.11e-07	1
NORAD	1.70184	1.68e-05	8.11e-07	1
CUL4B	1.71116	1.68e-05	8.1e-07	1
STAU2	1.68947	1.69e-05	8.17e-07	1
GIMAP2	1.70416	1.69e-05	8.17e-07	1
CSE1L	1.69837	1.69e-05	8.17e-07	1
TTLL12	1.70358	1.69e-05	8.2e-07	1
ZBTB8OS	1.70794	1.7e-05	8.24e-07	1
LRR1	1.70794	1.7e-05	8.26e-07	1
SAE1	1.6835	1.72e-05	8.33e-07	1
WARS1	1.68947	1.77e-05	8.6e-07	1
FRAT1	1.69808	1.79e-05	8.69e-07	1
CLCC1	1.69549	1.82e-05	8.88e-07	1
LAT2	1.69549	1.83e-05	8.94e-07	1
UGP2	1.70882	1.83e-05	8.95e-07	1
WSB2	1.69981	1.83e-05	8.9e-07	1
WDR41	1.70619	1.84e-05	8.99e-07	1
ACOX1	1.69233	1.84e-05	8.94e-07	1
SMIM20	1.69233	1.84e-05	8.99e-07	1
ARHGAP26	1.69952	1.85e-05	9.02e-07	1
IGLL3P	1.6818	1.86e-05	9.1e-07	1
IGF2BP3	1.69693	1.87e-05	9.15e-07	1
TMEM126B	1.70242	1.88e-05	9.22e-07	1
MRPS16	1.70213	1.91e-05	9.4e-07	1
INTS9	1.70736	1.91e-05	9.37e-07	1
SEC23B	1.68862	1.91e-05	9.35e-07	1
HDAC2	1.70184	1.91e-05	9.37e-07	1
ZSCAN29	1.68549	1.92e-05	9.4e-07	1
SLC30A5	1.67842	1.93e-05	9.49e-07	1
PACC1	1.69664	1.93e-05	9.48e-07	1
PTPRJ	1.70213	1.99e-05	9.81e-07	1
TTC33	1.66722	1.99e-05	9.79e-07	1
LRRC41	1.69837	1.99e-05	9.81e-07	1
PSMD1	1.69693	2.02e-05	9.98e-07	1
HPRT1	1.69463	2.02e-05	1e-06	1
ZNF765	1.69147	2.03e-05	1.01e-06	1
ORC5	1.69607	2.03e-05	1.01e-06	1
THEM4	1.66279	2.06e-05	1.02e-06	1
MAF	1.64285	2.08e-05	1.03e-06	1
TRIM44	1.7001	2.1e-05	1.04e-06	1
B3GALT6	1.70039	2.1e-05	1.04e-06	1
P4HB	1.66528	2.12e-05	1.05e-06	1
TRANK1	1.7001	2.14e-05	1.07e-06	1
OLIG1	1.62602	2.15e-05	1.07e-06	1
UTP6	1.69434	2.19e-05	1.09e-06	1
TMCO6	1.69291	2.21e-05	1.11e-06	1
PEX6	1.67616	2.21e-05	1.1e-06	1
TBXAS1	1.67645	2.22e-05	1.11e-06	1
KLHDC10	1.66917	2.33e-05	1.17e-06	1
SEC24D	1.68067	2.36e-05	1.18e-06	1
CEP63	1.68322	2.36e-05	1.19e-06	1
MRPL36	1.69405	2.37e-05	1.2e-06	1
KAT14	1.6742	2.37e-05	1.19e-06	1
ENTPD1	1.65508	2.37e-05	1.19e-06	1
MRPS33	1.68435	2.43e-05	1.23e-06	1
DFFA	1.69062	2.43e-05	1.23e-06	1
FNIP2	1.6728	2.44e-05	1.24e-06	1
DGCR2	1.68862	2.45e-05	1.24e-06	1
PNO1	1.65453	2.49e-05	1.26e-06	1
LY9	1.61499	2.51e-05	1.27e-06	1
CDC26	1.68833	2.51e-05	1.28e-06	1
CDKN2AIPNL	1.68776	2.52e-05	1.28e-06	1
EIF3J	1.68833	2.53e-05	1.28e-06	1
CPSF3	1.68407	2.53e-05	1.29e-06	1
CPNE2	1.69062	2.58e-05	1.31e-06	1
PSTPIP1	1.68067	2.61e-05	1.33e-06	1
SCAMP1	1.69119	2.63e-05	1.34e-06	1
FEZ2	1.6852	2.65e-05	1.36e-06	1
ENOX2	1.69033	2.66e-05	1.36e-06	1
CDC73	1.67336	2.7e-05	1.38e-06	1
BOP1	1.68294	2.71e-05	1.39e-06	1
INIP	1.68294	2.71e-05	1.39e-06	1
VRK3	1.6728	2.76e-05	1.42e-06	1
SLC31A2	1.69176	2.78e-05	1.43e-06	1
CCT4	1.68067	2.8e-05	1.44e-06	1
DECR1	1.69005	2.8e-05	1.44e-06	1
PRR14L	1.68067	2.8e-05	1.44e-06	1
MGST3	1.68464	2.82e-05	1.45e-06	1
ICMT	1.68095	2.83e-05	1.46e-06	1
CCDC97	1.67926	2.85e-05	1.47e-06	1
TMEM258	1.68209	2.86e-05	1.48e-06	1
DRAM1	1.66667	2.88e-05	1.48e-06	1
ADGRG5	1.67926	2.88e-05	1.48e-06	1
CKAP5	1.67673	2.9e-05	1.5e-06	1
PGM1	1.68152	2.92e-05	1.51e-06	1
C20orf27	1.68209	2.92e-05	1.51e-06	1
RWDD2B	1.67926	2.96e-05	1.53e-06	1
CLEC4A	1.67983	2.96e-05	1.53e-06	1
CHTF8	1.6787	3e-05	1.55e-06	1
PECAM1	1.66168	3.01e-05	1.56e-06	1
ABHD2	1.65536	3.03e-05	1.57e-06	1
GLIPR2	1.66945	3.04e-05	1.58e-06	1
DHTKD1	1.67364	3.04e-05	1.58e-06	1
PLXDC2	1.64609	3.08e-05	1.6e-06	1
TAF8	1.68095	3.09e-05	1.61e-06	1
RFT1	1.67364	3.13e-05	1.63e-06	1
ZHX1	1.67813	3.19e-05	1.67e-06	1
LACC1	1.59872	3.2e-05	1.67e-06	1
TMEM64	1.6728	3.2e-05	1.67e-06	1
PANK2	1.67813	3.21e-05	1.68e-06	1
MRPL4	1.66778	3.23e-05	1.69e-06	1
PARP4	1.66667	3.26e-05	1.71e-06	1
ZNF226	1.64123	3.28e-05	1.72e-06	1
ALKBH3	1.67504	3.3e-05	1.73e-06	1
PHB	1.68294	3.35e-05	1.76e-06	1
FKBP1A	1.64123	3.38e-05	1.78e-06	1
LAMTOR2	1.67532	3.38e-05	1.78e-06	1
NDUFB5	1.67308	3.38e-05	1.77e-06	1
LARP4B	1.65453	3.38e-05	1.78e-06	1
COPS7A	1.67504	3.38e-05	1.77e-06	1
CST3	1.65673	3.38e-05	1.78e-06	1
PLEKHB2	1.65508	3.38e-05	1.78e-06	1
RFC4	1.67364	3.42e-05	1.8e-06	1
GLIPR1	1.67588	3.44e-05	1.81e-06	1
KIAA2013	1.67729	3.46e-05	1.82e-06	1
SSR3	1.68095	3.46e-05	1.83e-06	1
CRLF3	1.66445	3.47e-05	1.84e-06	1
LSM2	1.665	3.49e-05	1.84e-06	1
HMGCR	1.64718	3.57e-05	1.89e-06	1
EIF4E3	1.67842	3.57e-05	1.89e-06	1
NSG1	1.64772	3.58e-05	1.9e-06	1
GAS7	1.66806	3.71e-05	1.97e-06	1
PRKCD	1.65948	3.72e-05	1.97e-06	1
BTLA	1.66583	3.76e-05	2e-06	1
PKP4	1.66973	3.8e-05	2.02e-06	1
HMGCL	1.67084	3.8e-05	2.02e-06	1
MRPL24	1.66806	3.83e-05	2.04e-06	1
PSMC2	1.66667	3.85e-05	2.05e-06	1
ANTKMT	1.66861	3.86e-05	2.06e-06	1
EFCAB14	1.67364	3.89e-05	2.08e-06	1
LOC283788	1.59974	3.9e-05	2.08e-06	1
DYNC1LI1	1.65289	3.94e-05	2.1e-06	1
GNPNAT1	1.67056	3.96e-05	2.12e-06	1
CIPC	1.66583	3.99e-05	2.14e-06	1
CISD2	1.6592	4e-05	2.14e-06	1
JRKL	1.65948	4e-05	2.14e-06	1
TMEM164	1.66722	4.04e-05	2.17e-06	1
TMEM204	1.62866	4.17e-05	2.24e-06	1
BCAP29	1.66058	4.17e-05	2.25e-06	1
CD33	1.65262	4.18e-05	2.25e-06	1
DDX23	1.66611	4.18e-05	2.25e-06	1
IFIT2	1.35483	4.24e-05	2.29e-06	1
MITF	1.66058	4.24e-05	2.29e-06	1
PLOD3	1.66556	4.24e-05	2.29e-06	1
MCM3	1.66472	4.25e-05	2.3e-06	1
HSPA1L	1.65673	4.39e-05	2.38e-06	1
CAT	1.64853	4.43e-05	2.4e-06	1
EPRS1	1.66694	4.45e-05	2.41e-06	1
TRAV13-2	1.64555	4.45e-05	2.42e-06	1
CXCL10	1.77778	4.45e-05	2.41e-06	1
DNAJC16	1.64853	4.52e-05	2.46e-06	1
ILK	1.66472	4.57e-05	2.48e-06	1
EID1	1.67252	4.6e-05	2.51e-06	1
MBP	1.65426	4.62e-05	2.52e-06	1
MED12	1.66251	4.65e-05	2.54e-06	1
SNRPD1	1.65399	4.69e-05	2.56e-06	1
FAM13A	1.5868	4.71e-05	2.57e-06	1
POLR3C	1.6592	4.75e-05	2.6e-06	1
JPT2	1.65426	4.78e-05	2.61e-06	1
MRPL3	1.65426	4.81e-05	2.63e-06	1
CLIC3	1.53116	4.95e-05	2.71e-06	1
IFTAP	1.66861	4.97e-05	2.72e-06	1
UBLCP1	1.6592	5e-05	2.74e-06	1
ADK	1.63639	5.01e-05	2.75e-06	1
PALM2AKAP2	1.63506	5.02e-05	2.75e-06	1
C11orf24	1.6603	5.05e-05	2.78e-06	1
NUDCD2	1.65344	5.06e-05	2.78e-06	1
PDK4	1.36407	5.12e-05	2.82e-06	1
PTGDR	1.49589	5.13e-05	2.83e-06	1
HDDC3	1.6559	5.15e-05	2.84e-06	1
BCAT1	1.54583	5.17e-05	2.85e-06	1
ZNF77	1.65563	5.17e-05	2.85e-06	1
BCL2L13	1.66334	5.19e-05	2.87e-06	1
PSMD14	1.65645	5.25e-05	2.9e-06	1
SLC35C2	1.66058	5.32e-05	2.94e-06	1
AGGF1	1.64908	5.33e-05	2.95e-06	1
UBTF	1.64989	5.37e-05	2.97e-06	1
NDUFB6	1.6518	5.4e-05	2.99e-06	1
DNAAF2	1.63399	5.42e-05	3.01e-06	1
CSTB	1.65044	5.44e-05	3.02e-06	1
TBCD	1.64528	5.45e-05	3.02e-06	1
NCF4	1.60385	5.45e-05	3.03e-06	1
MAP2K4	1.65289	5.51e-05	3.07e-06	1
GCDH	1.65508	5.51e-05	3.07e-06	1
STT3A	1.65017	5.51e-05	3.06e-06	1
MTM1	1.65071	5.52e-05	3.07e-06	1
ING1	1.65948	5.54e-05	3.09e-06	1
SERPING1	1.71292	5.55e-05	3.09e-06	1
ANKRD22	1.73491	5.55e-05	3.09e-06	1
ADGRE1	1.60539	5.57e-05	3.11e-06	1
PTPRN2	1.63079	5.61e-05	3.14e-06	1
GLCE	1.65344	5.61e-05	3.13e-06	1
TRIP11	1.6488	5.66e-05	3.17e-06	1
NCK1	1.64609	5.69e-05	3.19e-06	1
RNASEH2B	1.6559	5.69e-05	3.19e-06	1
MAGOHB	1.64908	5.7e-05	3.19e-06	1
VPS35L	1.64745	5.74e-05	3.22e-06	1
IGLV@	1.6442	5.77e-05	3.24e-06	1
MAVS	1.64853	5.8e-05	3.26e-06	1
TRAV9-2	1.62734	5.8e-05	3.26e-06	1
TRDC	1.55039	5.96e-05	3.36e-06	1
NAT1	1.64042	5.98e-05	3.37e-06	1
FOCAD	1.64718	6.01e-05	3.39e-06	1
ACO2	1.64582	6.06e-05	3.42e-06	1
GEMIN7	1.64609	6.09e-05	3.44e-06	1
PLRG1	1.64609	6.18e-05	3.5e-06	1
MTMR1	1.63345	6.19e-05	3.51e-06	1
CAB39	1.64123	6.23e-05	3.53e-06	1
TFEB	1.64258	6.23e-05	3.54e-06	1
TMEM176A	1.54536	6.25e-05	3.55e-06	1
ADCY7	1.63532	6.26e-05	3.56e-06	1
GRK3	1.63239	6.27e-05	3.57e-06	1
THAP1	1.64609	6.3e-05	3.59e-06	1
MGST1	1.62101	6.32e-05	3.6e-06	1
PELI3	1.64908	6.44e-05	3.68e-06	1
ADGRG1	1.54107	6.44e-05	3.67e-06	1
PDE3B	1.56055	6.44e-05	3.67e-06	1
GLG1	1.63052	6.56e-05	3.75e-06	1
SPART	1.64069	6.61e-05	3.78e-06	1
MRPL50	1.63159	6.72e-05	3.85e-06	1
STOM	1.63239	6.73e-05	3.86e-06	1
NINJ2-AS1	1.63106	6.86e-05	3.93e-06	1
RNASEH2C	1.64745	6.86e-05	3.94e-06	1
MOSMO	1.59515	6.88e-05	3.95e-06	1
GANAB	1.64339	6.9e-05	3.96e-06	1
SGPP1	1.63827	6.93e-05	3.98e-06	1
SIRPB1	1.56642	6.99e-05	4.03e-06	1
FAM204A	1.64935	7.04e-05	4.05e-06	1
ZNF320	1.64366	7.07e-05	4.08e-06	1
PAK2	1.6442	7.11e-05	4.1e-06	1
SMARCA2	1.63988	7.13e-05	4.12e-06	1
STYXL1	1.63586	7.27e-05	4.21e-06	1
IGKV1D-13	1.62813	7.28e-05	4.21e-06	1
MDH2	1.64204	7.28e-05	4.2e-06	1
TRIM56	1.58303	7.3e-05	4.23e-06	1
PNKP	1.64177	7.33e-05	4.25e-06	1
CHCHD7	1.63773	7.52e-05	4.37e-06	1
HADHA	1.62973	7.54e-05	4.38e-06	1
ZNF468	1.59693	7.54e-05	4.38e-06	1
UQCR10	1.64231	7.58e-05	4.41e-06	1
LXN	1.63747	7.62e-05	4.43e-06	1
EBAG9	1.64042	7.64e-05	4.45e-06	1
NDUFA12	1.64042	7.66e-05	4.46e-06	1
SWSAP1	1.63854	7.66e-05	4.46e-06	1
MGST2	1.64474	7.66e-05	4.46e-06	1
NUDT16	1.63586	7.69e-05	4.49e-06	1
FAM78A	1.64123	7.72e-05	4.51e-06	1
LSM10	1.64312	7.75e-05	4.52e-06	1
WDR12	1.63908	7.8e-05	4.56e-06	1
NDUFAF3	1.6372	7.82e-05	4.57e-06	1
ASPH	1.62048	7.86e-05	4.61e-06	1
PSMC4	1.63212	7.86e-05	4.6e-06	1
CLIC4	1.61891	7.86e-05	4.6e-06	1
NDUFC2	1.64069	7.87e-05	4.61e-06	1
MAD2L1	1.61421	7.88e-05	4.62e-06	1
CDK5	1.63827	7.95e-05	4.66e-06	1
CRYBG3	1.63506	7.95e-05	4.67e-06	1
TADA3	1.64069	7.98e-05	4.69e-06	1
PGBD2	1.63399	8.03e-05	4.72e-06	1
PDIA6	1.63827	8.17e-05	4.81e-06	1
DPP4	1.58579	8.18e-05	4.82e-06	1
CPVL	1.63479	8.25e-05	4.86e-06	1
LAMP3	1.69607	8.26e-05	4.87e-06	1
HENMT1	1.61865	8.42e-05	4.97e-06	1
SEMA3C	1.6239	8.45e-05	4.99e-06	1
SMARCA4	1.64069	8.53e-05	5.04e-06	1
VAMP5	1.63425	8.53e-05	5.04e-06	1
SULT1A1	1.62285	8.67e-05	5.13e-06	1
TRAPPC8	1.60333	8.68e-05	5.14e-06	1
LDAH	1.60128	8.86e-05	5.25e-06	1
CHCHD3	1.63452	8.95e-05	5.3e-06	1
HNRNPUL2	1.64366	9.03e-05	5.36e-06	1
MAGEF1	1.61812	9.1e-05	5.4e-06	1
PPIE	1.63773	9.1e-05	5.4e-06	1
RNASEH2A	1.62973	9.16e-05	5.44e-06	1
ZMYM1	1.62707	9.16e-05	5.44e-06	1
LIN7C	1.61708	9.21e-05	5.48e-06	1
C1QA	1.59566	9.22e-05	5.49e-06	1
HLA-DOB	1.63079	9.26e-05	5.52e-06	1
ATF7	1.6239	9.27e-05	5.52e-06	1
LZTFL1	1.61577	9.41e-05	5.61e-06	1
PPARA	1.62549	9.41e-05	5.61e-06	1
CDKN1C	1.61655	9.5e-05	5.67e-06	1
BICRAL	1.62602	9.57e-05	5.72e-06	1
RITA1	1.63159	9.65e-05	5.77e-06	1
ENDOG	1.63693	9.76e-05	5.84e-06	1
POLR3GL	1.6292	9.77e-05	5.85e-06	1
ADAP2	1.62681	9.77e-05	5.85e-06	1
PIBF1	1.59668	9.8e-05	5.88e-06	1
NAA38	1.63479	9.81e-05	5.88e-06	1
TMEM254	1.62575	9.82e-05	5.89e-06	1
LPAR5	1.60979	9.85e-05	5.91e-06	1
CD4	1.62364	9.86e-05	5.92e-06	1
SNX11	1.62575	9.95e-05	5.98e-06	1
HEBP1	1.6176	0.0001	6.01e-06	1
OGG1	1.61421	0.0001009	6.07e-06	1
GZMA	1.51149	0.0001012	6.09e-06	1
TRAK2	1.62655	0.0001028	6.2e-06	1
NEDD8	1.6292	0.0001032	6.22e-06	1
YIF1B	1.61917	0.0001036	6.25e-06	1
MFNG	1.59744	0.0001038	6.27e-06	1
UMPS	1.61342	0.0001048	6.33e-06	1
ZNF200	1.5753	0.0001052	6.36e-06	1
ZNF43	1.61681	0.0001052	6.36e-06	1
WASF2	1.62946	0.000106	6.42e-06	1
TGFBI	1.61057	0.0001061	6.42e-06	1
PPM1K	1.6116	0.0001069	6.48e-06	1
CARD9	1.61865	0.000107	6.49e-06	1
CTSO	1.63026	0.0001091	6.62e-06	1
PRPSAP1	1.63185	0.0001091	6.62e-06	1
TMEM80	1.62048	0.0001096	6.65e-06	1
PLBD1	1.60565	0.0001097	6.66e-06	1
IGHV3-47	1.62206	0.000111	6.75e-06	1
NXT2	1.62522	0.000111	6.75e-06	1
UBE2K	1.62311	0.0001114	6.78e-06	1
KDM5A	1.61551	0.0001117	6.8e-06	1
ATP8B4	1.62259	0.0001121	6.82e-06	1
SLC27A4	1.62602	0.0001121	6.83e-06	1
TAPBPL	1.61134	0.0001122	6.84e-06	1
PMM2	1.62338	0.0001125	6.86e-06	1
LOC105379362	1.60849	0.0001126	6.87e-06	1
SF3A1	1.61996	0.0001133	6.91e-06	1
ERAL1	1.62101	0.0001137	6.94e-06	1
MAN2B1	1.62206	0.0001152	7.04e-06	1
PPP6C	1.61996	0.0001157	7.08e-06	1
TIMM13	1.61865	0.0001172	7.18e-06	1
TSHZ1	1.57109	0.0001181	7.25e-06	1
STS	1.61943	0.0001187	7.29e-06	1
TRAV12-3	1.5949	0.0001191	7.33e-06	1
SCAMP1-AS1	1.61734	0.0001192	7.32e-06	1
RNF141	1.58806	0.0001196	7.36e-06	1
AP5M1	1.5569	0.0001197	7.37e-06	1
SDHAF4	1.6197	0.0001212	7.47e-06	1
MBTPS2	1.61525	0.0001231	7.59e-06	1
NEK9	1.62707	0.0001237	7.64e-06	1
ACYP2	1.60746	0.0001239	7.65e-06	1
PDLIM2	1.6072	0.000125	7.73e-06	1
PIGM	1.62206	0.0001252	7.74e-06	1
NTAQ1	1.61655	0.0001254	7.76e-06	1
KDELR1	1.61525	0.0001265	7.83e-06	1
ZNF585A	1.61655	0.0001273	7.88e-06	1
PTRH2	1.61525	0.0001289	7.99e-06	1
TTC37	1.58983	0.00013	8.06e-06	1
PPM1M	1.61238	0.0001302	8.08e-06	1
GALK2	1.62022	0.0001302	8.08e-06	1
ECHS1	1.61786	0.0001303	8.09e-06	1
P2RY12	1.24595	0.0001312	8.15e-06	1
SLAMF1	1.61655	0.0001315	8.17e-06	1
CLTA	1.61447	0.0001325	8.25e-06	1
AUH	1.59719	0.0001331	8.29e-06	1
DDX28	1.61865	0.0001333	8.31e-06	1
ZNF322	1.61525	0.0001334	8.32e-06	1
UBE2E2	1.60256	0.0001353	8.45e-06	1
LYPLAL1	1.58983	0.0001368	8.56e-06	1
FPR2	1.45666	0.0001377	8.62e-06	1
COMMD4	1.61525	0.0001377	8.63e-06	1
BMPR2	1.61108	0.0001388	8.71e-06	1
SRM	1.61316	0.0001388	8.7e-06	1
EOMES	1.50898	0.0001396	8.77e-06	1
TSEN15	1.61681	0.0001396	8.77e-06	1
FER	1.61603	0.00014	8.8e-06	1
SLC35A4	1.61264	0.0001403	8.83e-06	1
ASH2L	1.61108	0.0001404	8.84e-06	1
RBM42	1.60927	0.0001419	8.94e-06	1
BAZ1B	1.6176	0.0001423	8.97e-06	1
MRPL34	1.61082	0.0001424	8.98e-06	1
GOLM1	1.58103	0.0001427	9e-06	1
SP4	1.60668	0.0001428	9.01e-06	1
ELOVL7	1.20613	0.0001431	9.04e-06	1
SLC26A2	1.51012	0.0001445	9.13e-06	1
ZNF880	1.54799	0.0001456	9.2e-06	1
KLHL36	1.60282	0.0001466	9.27e-06	1
RAB4A	1.55885	0.0001469	9.31e-06	1
TREX1	1.60979	0.0001469	9.3e-06	1
LOC100129034	1.60385	0.000147	9.3e-06	1
MRPL46	1.60668	0.0001473	9.34e-06	1
RAP1A	1.60901	0.0001475	9.37e-06	1
HGF	1.61655	0.0001475	9.35e-06	1
SLFN12	1.60539	0.0001475	9.36e-06	1
PRPS2	1.61891	0.0001476	9.38e-06	1
NDUFB2	1.60823	0.000148	9.4e-06	1
BATF	1.61082	0.0001481	9.41e-06	1
MRPS27	1.59566	0.0001482	9.42e-06	1
DOK1	1.6116	0.0001483	9.44e-06	1
WDR36	1.55087	0.0001494	9.52e-06	1
LIAS	1.59974	0.0001495	9.53e-06	1
STK39	1.54297	0.0001503	9.58e-06	1
RANGRF	1.61238	0.0001505	9.6e-06	1
SCLY	1.61057	0.000151	9.63e-06	1
ACAT1	1.61264	0.0001516	9.67e-06	1
TMEM42	1.59668	0.0001517	9.69e-06	1
VRK2	1.60231	0.000153	9.77e-06	1
C11orf68	1.60694	0.0001546	9.88e-06	1
DZIP3	1.56961	0.0001573	1.01e-05	1
MFSD5	1.60875	0.0001574	1.01e-05	1
MCCC2	1.60875	0.0001582	1.01e-05	1
TRAV21	1.59363	0.000159	1.02e-05	1
EFNA4	1.61421	0.0001595	1.02e-05	1
OTULINL	1.61238	0.0001599	1.03e-05	1
SUGT1	1.59541	0.0001605	1.03e-05	1
PRORP	1.60875	0.0001608	1.03e-05	1
NELFB	1.60901	0.0001609	1.03e-05	1
BCS1L	1.60668	0.0001612	1.04e-05	1
SLC25A17	1.60823	0.0001613	1.04e-05	1
RFC3	1.59566	0.0001622	1.04e-05	1
ZNF101	1.59617	0.0001624	1.05e-05	1
PTBP3	1.60411	0.0001626	1.05e-05	1
PIP4P2	1.58781	0.0001626	1.05e-05	1
ACOX3	1.60282	0.0001647	1.06e-05	1
EMSY	1.59974	0.0001663	1.08e-05	1
CDK6	1.60488	0.00017	1.1e-05	1
CRTAM	1.58629	0.0001718	1.11e-05	1
FANCE	1.60256	0.0001743	1.13e-05	1
SEPTIN1	1.58881	0.0001743	1.13e-05	1
LOC93622	1.58403	0.0001752	1.14e-05	1
GCSAM	1.60179	0.0001754	1.14e-05	1
CRYZL1	1.59008	0.0001761	1.14e-05	1
UNC50	1.60772	0.0001767	1.15e-05	1
MACROD2	1.55715	0.0001768	1.15e-05	1
NCOA7	1.60591	0.0001777	1.16e-05	1
RTCB	1.60746	0.0001783	1.16e-05	1
PRPSAP2	1.59084	0.0001786	1.16e-05	1
IMP3	1.59185	0.000179	1.16e-05	1
FAM117A	1.60077	0.000181	1.18e-05	1
ANKFY1	1.59795	0.0001811	1.18e-05	1
NREP	1.59847	0.0001812	1.18e-05	1
PSAT1	1.61031	0.0001815	1.19e-05	1
FGD2	1.61082	0.0001815	1.18e-05	1
GET3	1.59821	0.0001819	1.19e-05	1
LARP4	1.58529	0.0001819	1.19e-05	1
ADAMTSL4	1.59439	0.0001824	1.19e-05	1
CCPG1	1.58353	0.0001832	1.2e-05	1
AGTRAP	1.59084	0.0001833	1.2e-05	1
COMMD2	1.5977	0.0001834	1.2e-05	1
RMDN2	1.60436	0.000186	1.22e-05	1
PIGV	1.60436	0.0001869	1.23e-05	1
GLMP	1.5868	0.0001871	1.23e-05	1
CRTAP	1.58303	0.0001877	1.23e-05	1
KIAA1671	1.56593	0.0001877	1.23e-05	1
IMPACT	1.60333	0.0001878	1.23e-05	1
TP53RK	1.58907	0.000188	1.24e-05	1
COMMD3	1.60231	0.0001886	1.24e-05	1
SULF2	1.54655	0.0001886	1.24e-05	1
MRPS35	1.59668	0.0001911	1.26e-05	1
CILK1	1.60077	0.0001915	1.26e-05	1
C7orf31	1.59312	0.0001918	1.26e-05	1
HLA-DMB	1.59719	0.0001941	1.28e-05	1
LRP10	1.58655	0.0001942	1.28e-05	1
SNX27	1.59566	0.0001944	1.28e-05	1
MAPKAPK3	1.59312	0.000195	1.29e-05	1
ISCA2	1.59821	0.0001965	1.3e-05	1
ADTRP	1.47798	0.0001965	1.3e-05	1
NTPCR	1.59261	0.0001975	1.31e-05	1
TRBV24-1	1.57233	0.0001976	1.31e-05	1
CCT6A	1.60256	0.0001985	1.31e-05	1
SPAST	1.5586	0.0001999	1.32e-05	1
PLEKHB1	1.57754	0.0002014	1.33e-05	1
MRPL58	1.59312	0.0002018	1.34e-05	1
SDF4	1.59058	0.0002027	1.34e-05	1
MYO9A	1.56666	0.0002034	1.35e-05	1
PNPO	1.59261	0.0002039	1.35e-05	1
TMEM273	1.55352	0.0002053	1.36e-05	1
PSMG1	1.59109	0.0002056	1.37e-05	1
AKR7A2	1.59821	0.0002068	1.38e-05	1
HAUS4	1.6	0.0002076	1.38e-05	1
MED4	1.46028	0.0002084	1.39e-05	1
DYNLT2B	1.58755	0.0002097	1.4e-05	1
BCKDK	1.59515	0.0002106	1.4e-05	1
CXCR2	1.34084	0.0002107	1.4e-05	1
MAP3K7	1.58755	0.0002112	1.41e-05	1
TIMM10	1.59363	0.0002127	1.42e-05	1
MRPS9	1.5706	0.0002127	1.42e-05	1
TRAPPC13	1.56079	0.0002132	1.42e-05	1
NDUFB1	1.59617	0.0002134	1.43e-05	1
LTA4H	1.5921	0.0002135	1.43e-05	1
CCDC34	1.60077	0.0002137	1.43e-05	1
CAPG	1.58028	0.0002137	1.43e-05	1
MCEE	1.5949	0.000216	1.45e-05	1
TMEM230	1.56642	0.0002161	1.45e-05	1
NUDT16L2P	1.60051	0.0002169	1.45e-05	1
ANKRD16	1.58881	0.0002178	1.46e-05	1
UBE2W	1.5873	0.000218	1.46e-05	1
SPINT1	1.59337	0.0002186	1.47e-05	1
CANT1	1.59312	0.0002198	1.48e-05	1
FAM111A	1.60077	0.0002199	1.48e-05	1
RHNO1	1.57356	0.0002199	1.48e-05	1
CDC16	1.59033	0.0002203	1.48e-05	1
TERF2	1.59668	0.0002218	1.49e-05	1
ERICH1	1.54178	0.0002235	1.51e-05	1
WWP1	1.56079	0.0002236	1.51e-05	1
NAPRT	1.55521	0.000224	1.51e-05	1
GRAMD4	1.59134	0.0002251	1.52e-05	1
CD101	1.59134	0.0002252	1.52e-05	1
DET1	1.5916	0.0002255	1.52e-05	1
SRFBP1	1.56961	0.0002255	1.52e-05	1
MICOS10	1.59185	0.0002258	1.53e-05	1
TATDN3	1.57505	0.0002262	1.53e-05	1
WDR77	1.58755	0.0002296	1.55e-05	1
PAGR1	1.59236	0.0002297	1.56e-05	1
ACD	1.58907	0.0002307	1.56e-05	1
SEC22B	1.55448	0.0002324	1.58e-05	1
MAL	1.55545	0.0002334	1.58e-05	1
CCNY	1.58378	0.0002334	1.58e-05	1
POGLUT3	1.58479	0.0002336	1.59e-05	1
B3GALT4	1.59008	0.0002337	1.59e-05	1
CNOT3	1.58604	0.0002354	1.6e-05	1
LPGAT1	1.59312	0.0002364	1.61e-05	1
IQCE	1.58705	0.0002386	1.62e-05	1
TST	1.57431	0.0002386	1.62e-05	1
TEX264	1.59693	0.0002387	1.62e-05	1
TBC1D2	1.57679	0.0002392	1.63e-05	1
PACRGL	1.57505	0.0002408	1.64e-05	1
RALB	1.58856	0.0002439	1.66e-05	1
NIT1	1.59084	0.0002442	1.67e-05	1
PUS7L	1.58228	0.0002452	1.67e-05	1
IKZF3	1.57903	0.0002457	1.68e-05	1
RRM2	1.58504	0.0002468	1.69e-05	1
TIFA	1.57978	0.0002471	1.69e-05	1
ETS1	1.53139	0.000249	1.71e-05	1
GPD2	1.56177	0.0002507	1.72e-05	1
ZFYVE21	1.59033	0.0002509	1.72e-05	1
UBE2D2	1.58983	0.000251	1.72e-05	1
POLH	1.58428	0.0002514	1.73e-05	1
PDHA1	1.58983	0.000253	1.74e-05	1
WASHC4	1.47623	0.0002554	1.76e-05	1
CAD	1.5873	0.0002588	1.78e-05	1
NHEJ1	1.5868	0.0002589	1.79e-05	1
LY6E	1.56519	0.0002589	1.79e-05	1
LIX1L	1.58228	0.000259	1.78e-05	1
TAFA1	1.57704	0.0002597	1.79e-05	1
RAB11A	1.58781	0.0002609	1.8e-05	1
RMDN1	1.58604	0.0002615	1.81e-05	1
CD79A	1.5444	0.0002616	1.81e-05	1
GPATCH11	1.47973	0.0002649	1.83e-05	1
EIF1AX	1.52602	0.0002654	1.84e-05	1
TPST2	1.57134	0.0002655	1.84e-05	1
PADI4	1.54321	0.0002675	1.85e-05	1
PRIMPOL	1.57853	0.0002683	1.86e-05	1
CEP104	1.57159	0.0002694	1.87e-05	1
OBI1	1.5425	0.0002701	1.88e-05	1
DNAAF5	1.58705	0.0002707	1.88e-05	1
ANKRD20A5P	1.58128	0.0002729	1.9e-05	1
KLHL42	1.54727	0.0002738	1.91e-05	1
NAP1L3	1.54871	0.0002745	1.91e-05	1
TOLLIP	1.58078	0.0002748	1.91e-05	1
SIPA1	1.58153	0.0002749	1.92e-05	1
TMEM154	1.53941	0.0002749	1.92e-05	1
MRPS17	1.58554	0.0002814	1.97e-05	1
PLD3	1.5758	0.0002826	1.98e-05	1
ADCY9	1.56323	0.0002826	1.98e-05	1
CASP7	1.57853	0.0002826	1.97e-05	1
GCNT1	1.57803	0.000283	1.98e-05	1
ATG3	1.58554	0.0002834	1.98e-05	1
RSPRY1	1.54583	0.0002835	1.98e-05	1
ZBTB38	1.56421	0.0002844	1.99e-05	1
UTP14A	1.58504	0.0002848	2e-05	1
ELP5	1.58353	0.0002868	2.01e-05	1
FAM89B	1.57828	0.0002877	2.02e-05	1
ARHGAP18	1.52812	0.0002906	2.04e-05	1
KIAA0319L	1.58153	0.0002924	2.06e-05	1
MAN1A2	1.57978	0.0002928	2.06e-05	1
MEN1	1.58303	0.0002973	2.09e-05	1
STING1	1.58228	0.0002986	2.1e-05	1
MED28	1.57307	0.0002988	2.11e-05	1
FBXL15	1.58403	0.0002989	2.1e-05	1
UNC119B	1.56397	0.0003011	2.12e-05	1
GHDC	1.5753	0.0003015	2.13e-05	1
RBMS1	1.57778	0.0003021	2.13e-05	1
SPATC1L	1.56838	0.0003028	2.14e-05	1
TBCB	1.58103	0.0003029	2.14e-05	1
PPCS	1.57878	0.000303	2.14e-05	1
TUBGCP3	1.55135	0.000303	2.14e-05	1
ATP13A1	1.57903	0.000303	2.14e-05	1
DPF2	1.57928	0.0003036	2.15e-05	1
MAST3	1.56372	0.0003047	2.16e-05	1
UCHL5	1.57555	0.0003048	2.16e-05	1
TIPRL	1.58053	0.0003051	2.16e-05	1
TBL3	1.57928	0.0003097	2.2e-05	1
RBM12	1.55328	0.000312	2.21e-05	1
LINC01192	1.57878	0.0003128	2.22e-05	1
LOC646214	1.58378	0.0003137	2.23e-05	1
SETD9	1.55958	0.000314	2.23e-05	1
SPNS3	1.57183	0.0003168	2.25e-05	1
CD1C	1.55159	0.0003178	2.26e-05	1
MFHAS1	1.54488	0.0003183	2.27e-05	1
PANX1	1.56274	0.0003184	2.27e-05	1
ETFA	1.57629	0.0003185	2.27e-05	1
DDX18	1.58078	0.000319	2.27e-05	1
SULT1A2	1.56814	0.0003213	2.29e-05	1
POLR2H	1.57356	0.0003214	2.29e-05	1
DBP	1.56446	0.0003234	2.31e-05	1
IL2RG	1.56128	0.000326	2.33e-05	1
LY96	1.53917	0.0003263	2.33e-05	1
MPND	1.57282	0.0003267	2.33e-05	1
PUS7	1.57035	0.0003274	2.34e-05	1
ITGB3	1.13379	0.0003278	2.35e-05	1
FCER2	1.57109	0.0003297	2.36e-05	1
DNAJC15	1.56128	0.0003298	2.36e-05	1
MTHFD1	1.57307	0.0003299	2.36e-05	1
COX10	1.56691	0.0003301	2.37e-05	1
PIAS4	1.57679	0.0003359	2.41e-05	1
MRPS30	1.54919	0.0003376	2.42e-05	1
SUCLG1	1.57803	0.0003376	2.42e-05	1
EDEM2	1.57679	0.0003384	2.43e-05	1
KLHDC3	1.57282	0.0003385	2.43e-05	1
AP2A2	1.57356	0.0003405	2.45e-05	1
UBA5	1.56495	0.0003489	2.51e-05	1
CAMK1	1.5625	0.000349	2.51e-05	1
METTL8	1.56568	0.0003518	2.54e-05	1
LCORL	1.53965	0.0003534	2.55e-05	1
ARHGEF10L	1.57431	0.0003534	2.55e-05	1
ANXA2	1.58253	0.0003535	2.55e-05	1
TECPR1	1.56887	0.000354	2.56e-05	1
NDUFAF4	1.56544	0.000354	2.56e-05	1
GPANK1	1.56617	0.0003542	2.56e-05	1
EMILIN2	1.54321	0.0003547	2.56e-05	1
APOBEC3G	1.54991	0.0003548	2.57e-05	1
TRMT112	1.57233	0.0003574	2.59e-05	1
PCCB	1.56961	0.0003584	2.6e-05	1
CASP10	1.57233	0.0003598	2.61e-05	1
NDUFAB1	1.57282	0.0003606	2.62e-05	1
PRXL2A	1.57878	0.0003606	2.62e-05	1
PML	1.57754	0.0003622	2.63e-05	1
ZNF623	1.56226	0.0003707	2.69e-05	1
APIP	1.57257	0.0003714	2.7e-05	1
PAPSS2	1.54036	0.0003729	2.72e-05	1
DYSF	1.53327	0.0003761	2.75e-05	1
ING4	1.56863	0.0003762	2.75e-05	1
PRMT7	1.57456	0.000377	2.75e-05	1
PSMF1	1.56863	0.0003793	2.77e-05	1
PRAM1	1.56055	0.0003794	2.77e-05	1
PIP4K2B	1.58053	0.0003838	2.81e-05	1
CPNE1	1.56079	0.0003842	2.81e-05	1
ITGB2	1.56519	0.0003873	2.84e-05	1
NQO2	1.49701	0.0003889	2.85e-05	1
PSMD4	1.56986	0.000393	2.88e-05	1
CDK8	1.53965	0.0003953	2.9e-05	1
LRRC47	1.56863	0.0003982	2.92e-05	1
AGK	1.54895	0.0004002	2.94e-05	1
DR1	1.56031	0.0004011	2.95e-05	1
CHCHD4	1.56642	0.000402	2.96e-05	1
TTC9C	1.56789	0.0004028	2.96e-05	1
CSNK1G1	1.54297	0.0004093	3.01e-05	1
ESD	1.56495	0.0004104	3.02e-05	1
TNFSF13	1.54895	0.0004116	3.03e-05	1
TIMM50	1.56838	0.0004138	3.05e-05	1
ORC4	1.56104	0.000414	3.05e-05	1
ARMCX2	1.56446	0.0004154	3.07e-05	1
SLC18B1	1.5706	0.0004182	3.09e-05	1
LTB4R	1.55958	0.0004226	3.12e-05	1
ARL3	1.55352	0.0004294	3.17e-05	1
TIGD2	1.5647	0.0004294	3.17e-05	1
MPP7	1.49611	0.000434	3.21e-05	1
LYRM2	1.55836	0.0004357	3.22e-05	1
AMN1	1.54967	0.0004361	3.23e-05	1
SIGIRR	1.55255	0.0004399	3.26e-05	1
TRMT12	1.56177	0.0004427	3.28e-05	1
NDRG3	1.55739	0.000444	3.29e-05	1
HS1BP3	1.55739	0.0004479	3.32e-05	1
DCXR	1.56006	0.0004497	3.34e-05	1
CD86	1.54036	0.0004512	3.35e-05	1
QPCT	1.50218	0.000453	3.37e-05	1
FAS	1.52625	0.0004544	3.38e-05	1
ZNF518B	1.55135	0.0004559	3.39e-05	1
SLC15A2	1.55159	0.0004602	3.43e-05	1
FAM174A	1.55207	0.0004603	3.43e-05	1
PLPP6	1.53586	0.0004603	3.43e-05	1
DHX33	1.56274	0.0004605	3.44e-05	1
DESI1	1.55111	0.0004606	3.44e-05	1
SMG8	1.55788	0.0004611	3.44e-05	1
SAP18	1.55715	0.0004623	3.45e-05	1
RETSAT	1.56446	0.0004624	3.46e-05	1
[truncated: 3,673 more rows]

## Sheet: E-MTAB-11415
Gene	FC	q.Value	p.Value	Direction
HLA-DRB1	2.14777	9.85e-26	4.44e-30	1
HLA-DRB5	2.20167	3.5e-19	3.15e-23	1
HBG1	1.32328	3.51e-15	6.33e-19	1
RBM43	1.49321	3.81e-15	5.16e-19	1
HBG2	1.25834	5.74e-15	1.29e-18	1
LILRA3	1.75377	6.85e-15	1.85e-18	1
TEP1	1.3887	2.66e-14	8.4e-18	1
RGS1	1.49925	1.63e-13	5.88e-17	1
CAMP	1.36351	4.47e-13	1.81e-16	1
CXCR4	1.46843	9.01e-13	4.06e-16	1
PBEF1	1.66362	1.65e-12	8.18e-16	1
CDKN2D	1.64258	1.97e-12	1.06e-15	1
ERAF	1.46071	2.32e-12	1.36e-15	1
LOC728358	1.33014	3.23e-11	2.18e-14	1
FAM118A	1.23747	3.24e-11	2.34e-14	1
TMEM176A	1.12537	1.02e-10	7.8e-14	1
HLA-DQB1	1.38332	1.2e-10	9.72e-14	1
HBD	1.39063	2.49e-10	2.13e-13	1
S100P	1.47645	4.64e-10	4.18e-13	1
C1QA	1.37855	5.17e-10	4.89e-13	1
ACTG1	1.31303	7.01e-10	7.27e-13	1
DUSP6	1.40213	1.28e-09	1.38e-12	1
C1QB	1.39978	2.82e-09	3.31e-12	1
COG5	1.52346	3.11e-09	3.93e-12	1
DPP7	1.41303	3.17e-09	3.85e-12	1
GSTT1	1.36556	4.34e-09	5.67e-12	1
IL8	1.22835	4.49e-09	6.08e-12	1
RASSF1	1.33618	5.23e-09	7.3e-12	1
DUSP2	1.37931	7.54e-09	1.09e-11	1
TRADD	1.39121	1.16e-08	1.73e-11	1
NFIC	1.2038	1.35e-08	2.2e-11	1
CRTAP	1.41743	1.36e-08	2.27e-11	1
METRNL	1.4828	1.39e-08	2.19e-11	1
CTSG	1.47907	1.65e-08	2.83e-11	1
DKFZp761E198	1.37665	1.78e-08	3.22e-11	1
MYL4	1.38485	1.81e-08	3.18e-11	1
MAT2B	1.41924	2.16e-08	4e-11	1
ARHGAP30	1.37231	3.78e-08	7.16e-11	1
ALDOA	1.34264	5.66e-08	1.1e-10	1
EPB41L4B	1.18948	5.76e-08	1.14e-10	1
AQP9	1.4652	6.15e-08	1.25e-10	1
FASTK	1.28899	7.88e-08	1.64e-10	1
VNN1	1.29668	1.11e-07	2.41e-10	1
LGALS3	1.38179	1.2e-07	2.65e-10	1
PROK2	1.44009	1.29e-07	2.91e-10	1
SCGB3A1	1.21729	1.37e-07	3.16e-10	1
LILRA5	1.5058	1.48e-07	3.46e-10	1
SAMHD1	1.44571	1.81e-07	4.32e-10	1
MATK	1.34318	2.08e-07	5.07e-10	1
TCIRG1	1.36968	2.09e-07	5.17e-10	1
FBXO32	1.31182	2.12e-07	5.36e-10	1
PICALM	1.31926	2.53e-07	6.5e-10	1
ANXA2	1.39704	2.77e-07	7.49e-10	1
HM13	1.37646	2.81e-07	7.49e-10	1
TNNT1	1.19918	3.04e-07	8.35e-10	1
SLC3A2	1.48368	3.65e-07	1.02e-09	1
USMG5	1.09697	4.18e-07	1.19e-09	1
LOC643576	1.37024	4.99e-07	1.49e-09	1
PCDHGA1	1.08826	6.2e-07	1.87e-09	1
LGALS2	1.22926	6.34e-07	1.97e-09	1
UBE2L6	1.3217	6.43e-07	1.97e-09	1
SLC25A20	1.28634	7.42e-07	2.34e-09	1
PSMC4	1.26374	8.22e-07	2.67e-09	1
C19orf6	1.20467	9.7e-07	3.19e-09	1
MMP9	1.24502	9.96e-07	3.32e-09	1
RASSF5	1.39198	1.2e-06	4.12e-09	1
KIAA1271	1.27324	1.26e-06	4.37e-09	1
SLC22A16	1.40568	1.5e-06	5.29e-09	1
ECGF1	1.27763	1.59e-06	5.67e-09	1
OKL38	1.38141	1.62e-06	5.82e-09	1
WDR1	1.32293	1.93e-06	7.03e-09	1
FOLR3	1.13443	2.53e-06	9.46e-09	1
ADM	1.39489	2.79e-06	1.07e-08	1
PDK4	1.1812	2.79e-06	1.06e-08	1
STOM	1.2663	2.84e-06	1.14e-08	1
GSTM3	1.1885	2.87e-06	1.14e-08	1
CLEC4D	1.31527	2.87e-06	1.13e-08	1
CD151	1.27616	2.87e-06	1.11e-08	1
PTPRE	1.41223	2.98e-06	1.21e-08	1
BPI	1.29702	3.02e-06	1.24e-08	1
FPR1	1.42694	3.3e-06	1.38e-08	1
EDG2	1.28866	3.45e-06	1.48e-08	1
ANPEP	1.29584	3.45e-06	1.46e-08	1
YWHAZ	1.20992	3.52e-06	1.52e-08	1
SON	1.34844	3.78e-06	1.69e-08	1
MYL9	1.04395	3.79e-06	1.71e-08	1
THOC4	1.27943	4.51e-06	2.05e-08	1
Gcom1	1.14064	4.88e-06	2.25e-08	1
COMT	1.37155	5.46e-06	2.54e-08	1
LOC201175	1.41123	6.22e-06	2.92e-08	1
TLR8	1.32205	6.47e-06	3.06e-08	1
CCR4	1.27421	6.74e-06	3.22e-08	1
SAMD14	1.23962	6.86e-06	3.31e-08	1
CD8A	1.167	7.07e-06	3.44e-08	1
CMTM2	1.35722	7.36e-06	3.72e-08	1
RNF125	1.21714	7.36e-06	3.65e-08	1
GPX1	1.36575	7.4e-06	3.71e-08	1
MCL1	1.32996	7.51e-06	3.82e-08	1
CDC42SE2	1.3598	8.61e-06	4.43e-08	1
VMO1	1.33976	9.04e-06	4.68e-08	1
CERKL	1.24938	9.49e-06	5.05e-08	1
ST3GAL1	1.37495	9.78e-06	5.25e-08	1
PDLIM7	1.19417	1.02e-05	5.49e-08	1
OSBP2	1.19904	1.03e-05	5.61e-08	1
RBPMS2	1.18638	1.18e-05	6.47e-08	1
NRG1	1.29016	1.21e-05	6.71e-08	1
HMBS	1.34066	1.29e-05	7.2e-08	1
CCT7	1.28932	1.33e-05	7.5e-08	1
SCAND1	1.32767	1.51e-05	8.77e-08	1
MGLL	1.21847	1.51e-05	8.85e-08	1
CTSL1	1.28766	1.52e-05	8.67e-08	1
SASH1	1.33815	1.52e-05	8.74e-08	1
CDKN1C	1.20584	1.52e-05	8.62e-08	1
IRX3	1.08249	1.55e-05	9.15e-08	1
ARHGAP6	1.07712	1.67e-05	9.99e-08	1
CHST13	1.30668	1.68e-05	9.98e-08	1
TSPO	1.35336	1.78e-05	1.07e-07	1
NUAK1	1.25188	1.94e-05	1.18e-07	1
FAM53B	1.29467	1.95e-05	1.19e-07	1
GLUL	1.33601	2.07e-05	1.28e-07	1
CLC	1.4573	2.18e-05	1.36e-07	1
DSC2	1.19332	2.25e-05	1.41e-07	1
PLA2G4C	1.09445	2.33e-05	1.47e-07	1
PGLYRP1	1.15194	2.43e-05	1.55e-07	1
HES4	1.25913	2.51e-05	1.63e-07	1
ALDH1A1	1.32258	2.52e-05	1.63e-07	1
ZMYND15	1.32784	2.55e-05	1.67e-07	1
P2RY13	1.2054	2.6e-05	1.71e-07	1
OSM	1.24254	2.75e-05	1.82e-07	1
PPIL3	1.21477	2.79e-05	1.86e-07	1
PARP10	1.10534	2.85e-05	1.91e-07	1
CXorf34	1.22264	2.91e-05	1.98e-07	1
HBQ1	1.1919	2.91e-05	2e-07	1
MMP25	1.30804	2.92e-05	2.07e-07	1
CTBP2	1.3282	2.93e-05	2.05e-07	1
PTGS1	1.25881	2.93e-05	2.06e-07	1
C16orf14	1.27226	2.94e-05	2.04e-07	1
KRBA2	1.22324	2.95e-05	2.04e-07	1
THBS1	1.22324	2.97e-05	2.11e-07	1
AGPAT2	1.30668	2.99e-05	2.14e-07	1
IFITM3	1.21462	2.99e-05	2.16e-07	1
SKIP	1.25298	3.06e-05	2.22e-07	1
VSTM1	1.25251	3.2e-05	2.34e-07	1
IL1R2	1.28238	3.24e-05	2.38e-07	1
AMD1	1.16077	3.28e-05	2.44e-07	1
DHX9	1.26183	3.28e-05	2.42e-07	1
NCF1	1.18807	3.3e-05	2.47e-07	1
C21orf56	1.25109	3.44e-05	2.6e-07	1
CSF3R	1.15567	3.44e-05	2.59e-07	1
LOC653994	1.39821	3.46e-05	2.64e-07	1
UBE2I	1.17564	3.46e-05	2.65e-07	1
CXCL5	1.13456	3.5e-05	2.7e-07	1
LOC399900	1.17398	3.52e-05	2.73e-07	1
NPDC1	1.25298	3.56e-05	2.78e-07	1
UNC93B1	1.24054	3.59e-05	2.83e-07	1
TUBB	1.25282	3.6e-05	2.82e-07	1
TPM3	1.29702	3.71e-05	2.94e-07	1
THRAP5	1.25	3.82e-05	3.05e-07	1
FAM13A1	1.37969	3.84e-05	3.08e-07	1
C9orf72	1.33601	3.85e-05	3.11e-07	1
PDE1A	1.15768	3.99e-05	3.24e-07	1
SMARCD3	1.38966	4.02e-05	3.28e-07	1
COP1	1.08921	4.23e-05	3.47e-07	1
BTBD1	1.18441	4.3e-05	3.55e-07	1
ATF4	1.25486	4.34e-05	3.6e-07	1
RPL8	1.28833	4.4e-05	3.67e-07	1
FPRL1	1.2387	4.4e-05	3.71e-07	1
ACCN5	1.07135	4.41e-05	3.7e-07	1
MAP2K3	1.27033	4.43e-05	3.75e-07	1
ANXA3	1.21065	4.55e-05	3.88e-07	1
PAPSS2	1.26968	4.73e-05	4.05e-07	1
KLF10	1.317	5.32e-05	4.58e-07	1
SDSL	1.31096	5.7e-05	4.93e-07	1
BTBD14A	1.35704	5.84e-05	5.08e-07	1
TSPAN18	1.10852	5.84e-05	5.11e-07	1
ZNF365	1.18399	6.46e-05	5.71e-07	1
CAMKK2	1.30993	6.93e-05	6.16e-07	1
DUSP4	1.27535	7.18e-05	6.44e-07	1
CDK10	1.25945	7.22e-05	6.44e-07	1
GK	1.36129	7.26e-05	6.58e-07	1
CYP27A1	1.35925	7.27e-05	6.56e-07	1
CDC42EP3	1.27845	7.89e-05	7.22e-07	1
ITGB1	1.25219	7.93e-05	7.3e-07	1
ATXN3	1.2276	8.11e-05	7.57e-07	1
CTBP1	1.23031	8.18e-05	7.71e-07	1
ACTB	1.20685	8.22e-05	7.7e-07	1
IGFBP3	1.26358	8.45e-05	8e-07	1
SLC39A3	1.21403	8.51e-05	8.09e-07	1
Kua-UEV	1.25565	8.59e-05	8.21e-07	1
RAB43	1.35943	8.84e-05	8.49e-07	1
FCGR2A	1.32855	9.64e-05	9.3e-07	1
USP4	1.26839	0.0001023	9.91e-07	1
ZNF80	1.29601	0.0001038	1.01e-06	1
MARCO	1.16198	0.0001092	1.07e-06	1
NBPF14	1.13314	0.0001104	1.08e-06	1
DMN	1.3009	0.0001116	1.1e-06	1
BRWD1	1.07991	0.0001122	1.11e-06	1
CCNDBP1	1.24471	0.000127	1.27e-06	1
JSRP1	1.27502	0.0001275	1.28e-06	1
CHMP6	1.35483	0.0001313	1.33e-06	1
ME3	1.24642	0.0001372	1.4e-06	1
C14orf153	1.12221	0.0001418	1.45e-06	1
PVRL2	1.29333	0.0001435	1.48e-06	1
CENTB5	1.01513	0.0001452	1.5e-06	1
VASH1	1.27146	0.000147	1.52e-06	1
TA-NFKBH	1.22294	0.0001485	1.55e-06	1
FAF1	1.21714	0.0001539	1.61e-06	1
MAEA	1.24425	0.0001565	1.64e-06	1
MYEOV	1.13546	0.0001584	1.67e-06	1
SBNO1	1.29467	0.0001675	1.78e-06	1
GIYD2	1.24642	0.0001734	1.85e-06	1
CLEC7A	1.22474	0.0001776	1.91e-06	1
CRISPLD2	1.30141	0.0001782	1.91e-06	1
CPA5	1.16836	0.0001814	1.96e-06	1
UBTD1	1.32591	0.000191	2.08e-06	1
TGFBR2	1.09182	0.0001917	2.1e-06	1
2001-03-01	1.24378	0.0002028	2.23e-06	1
MDFIC	1.20482	0.000206	2.28e-06	1
CDC14B	1.2216	0.0002084	2.33e-06	1
HDC	1.12145	0.0002093	2.35e-06	1
PLEC1	1.15888	0.0002208	2.51e-06	1
OTUD7B	1.21242	0.0002235	2.56e-06	1
PLEKHB2	1.25266	0.0002243	2.56e-06	1
SPOCD1	1.13507	0.000232	2.67e-06	1
VWF	1.12435	0.0002374	2.74e-06	1
CYP1B1	1.17123	0.0002432	2.82e-06	1
FLJ39501	1.19446	0.0002465	2.87e-06	1
LIMS1	1.01031	0.0002494	2.92e-06	1
MGAT4B	1.16266	0.0002495	2.91e-06	1
GPR34	1.21862	0.0002698	3.19e-06	1
ELA2	1.21124	0.00027	3.2e-06	1
SIGIRR	1.21256	0.0002747	3.28e-06	1
TAP2	1.19589	0.0002753	3.28e-06	1
PRR5	1.2054	0.0002797	3.35e-06	1
GRINL1A	1.24378	0.0002797	3.37e-06	1
ST8SIA4	1.27894	0.0002816	3.4e-06	1
TSRC1	1.25597	0.0002835	3.44e-06	1
NLRC5	1.06929	0.0002864	3.53e-06	1
LOC729264	1.05697	0.0002872	3.52e-06	1
LOC399744	1.04482	0.0002875	3.51e-06	1
LOC441193	1.04613	0.0002884	3.51e-06	1
S100A12	1.09469	0.0002885	3.56e-06	1
TRPM4	1.24131	0.0003012	3.73e-06	1
TP53I3	1.26295	0.0003042	3.78e-06	1
CDC2L1	1.19005	0.000313	3.92e-06	1
CNN2	1.22699	0.0003136	3.92e-06	1
MPO	1.23594	0.0003258	4.1e-06	1
LOC89944	1.16673	0.0003279	4.14e-06	1
CDK5RAP3	1.06045	0.000328	4.17e-06	1
CADM1	1.1722	0.000328	4.18e-06	1
ANG	1.31648	0.0003593	4.6e-06	1
SLC1A7	1.04504	0.0003606	4.65e-06	1
CCNC	1.16306	0.0003615	4.64e-06	1
PDE4B	1.14247	0.0003776	4.92e-06	1
IIP45	1.13327	0.0003784	4.91e-06	1
CYP4F3	1.15929	0.0003793	4.91e-06	1
RAB20	1.27178	0.000386	5.05e-06	1
UBL7	1.26582	0.0003923	5.15e-06	1
LOC153561	1.20322	0.0004156	5.47e-06	1
TXNDC5	1.23411	0.0004227	5.58e-06	1
ARHGAP26	1.27324	0.0004256	5.64e-06	1
CFP	1.29584	0.0004313	5.74e-06	1
LSP1	1.16891	0.0004351	5.81e-06	1
SNX5	1.23365	0.0004394	5.88e-06	1
DOK2	1.15447	0.0004988	6.72e-06	1
PI16	1.153	0.0005	6.76e-06	1
RAE1	1.317	0.000501	6.82e-06	1
HSPA6	1.21951	0.0005013	6.8e-06	1
EPB42	1.25471	0.000503	6.89e-06	1
RBMS2	1.27486	0.0005037	6.93e-06	1
COL18A1	1.07342	0.0005043	6.89e-06	1
C4orf18	1.21743	0.0005236	7.22e-06	1
RETN	1.213	0.0005581	7.72e-06	1
ISG15	1.18624	0.0005654	7.85e-06	1
EIF5	1.21862	0.0005899	8.22e-06	1
QPCT	1.18022	0.0005903	8.3e-06	1
BPNT1	1.20062	0.0005907	8.33e-06	1
CLOCK	1.20963	0.0005917	8.38e-06	1
RNASE4	1.1722	0.0005922	8.3e-06	1
AMY2B	1.08507	0.0005922	8.28e-06	1
RAB11FIP5	1.21492	0.0005947	8.44e-06	1
KIF1B	1.23198	0.0005959	8.49e-06	1
TDRD9	1.22941	0.0006143	8.78e-06	1
CLN8	1.06033	0.0006352	9.11e-06	1
HLA-C	1.07147	0.0006401	9.2e-06	1
LOC401233	1.07193	0.0006707	9.68e-06	1
CITED4	1.14758	0.0006937	1.01e-05	1
CABP5	1.16482	0.0007042	1.03e-05	1
LSM12	1.25266	0.0007163	1.05e-05	1
PANX2	1.27828	0.0007174	1.05e-05	1
CPEB4	1.16713	0.000718	1.05e-05	1
EGR1	1.03648	0.0007275	1.07e-05	1
CD8B1	1.09926	0.0007359	1.09e-05	1
APOBEC3A	1.0784	0.0007606	1.13e-05	1
GOLPH2	1.21212	0.0007835	1.17e-05	1
REEP1	1.17813	0.0008154	1.22e-05	1
ITGA2B	1.17675	0.0008157	1.22e-05	1
NANOS1	1.23579	0.0008163	1.23e-05	1
CLSTN3	1.14495	0.0008211	1.24e-05	1
FCGR3B	1.22384	0.0008391	1.28e-05	1
TMEM127	1.29769	0.0008404	1.27e-05	1
SIGLEC5	1.10534	0.0008437	1.29e-05	1
MGC20983	1.1805	0.0008705	1.34e-05	1
FAM21C	1.16986	0.0008723	1.34e-05	1
GZMH	1.11757	0.0008818	1.37e-05	1
HP	1.13186	0.0008825	1.37e-05	1
TIMP2	1.16877	0.0008856	1.39e-05	1
SERTAD3	1.29921	0.0008872	1.38e-05	1
RBM12	1.20569	0.000903	1.42e-05	1
DDIT4	1.15354	0.0009157	1.44e-05	1
RPLP0	1.19204	0.0009236	1.46e-05	1
BTN3A3	1.24177	0.0009627	1.52e-05	1
CNNM2	1.27943	0.0009942	1.58e-05	1
ERCC1	1.20948	0.0009942	1.59e-05	1
SLC25A24	1.17151	0.0009975	1.6e-05	1
PILRA	1.22745	0.001005	1.61e-05	1
PHKB	1.21153	0.001048	1.69e-05	1
GNG10	1.25913	0.001112	1.8e-05	1
TCN2	1.21139	0.00112	1.81e-05	1
AP1S1	1.22654	0.00112	1.82e-05	1
TSPAN9	1.13263	0.001151	1.87e-05	1
VPS16	1.22684	0.001157	1.89e-05	1
PPP3R1	1.17952	0.001159	1.89e-05	1
PSMB8	1.16891	0.00116	1.9e-05	1
EMR3	1.27535	0.001184	1.95e-05	1
JUP	1.12701	0.001221	2.01e-05	1
TNNC2	1.11458	0.001238	2.05e-05	1
ZNF345	1.15327	0.001262	2.09e-05	1
MSL3L1	1.09902	0.001263	2.1e-05	1
PPP2R2D	1.18329	0.001285	2.14e-05	1
UBE2L3	1.20351	0.001286	2.15e-05	1
EYA3	1.1396	0.001287	2.16e-05	1
PIM3	1.16564	0.001291	2.17e-05	1
RSU1	1.13366	0.001314	2.22e-05	1
PROS1	1.11161	0.001319	2.23e-05	1
NLRP12	1.20019	0.001342	2.27e-05	1
NINJ2	1.28386	0.001399	2.38e-05	1
CDC20	1.18147	0.001413	2.41e-05	1
CCT6A	1.14469	0.001421	2.43e-05	1
C14orf124	1.22745	0.001428	2.45e-05	1
NFIL3	1.24008	0.001449	2.49e-05	1
SMYD2	1.16659	0.001452	2.5e-05	1
SAMD4A	1.24254	0.001511	2.61e-05	1
SFTPD	1.12994	0.001517	2.63e-05	1
MINK1	1.03907	0.001526	2.65e-05	1
CD82	1.1976	0.001535	2.67e-05	1
GNAZ	1.16252	0.001538	2.68e-05	1
MGC14376	1.25976	0.001554	2.72e-05	1
RASGRP4	1.23213	0.001559	2.73e-05	1
GGA1	1.22339	0.001582	2.78e-05	1
SERPINA1	1.21818	0.001595	2.81e-05	1
GPR177	1.21951	0.001598	2.84e-05	1
CLK3	1.20135	0.001599	2.83e-05	1
CD14	1.30753	0.001599	2.83e-05	1
C3orf60	1.1566	0.001616	2.88e-05	1
C9orf16	1.18835	0.001667	2.98e-05	1
RABL2A	1.17869	0.001677	3.01e-05	1
TIAM1	1.1919	0.00168	3.03e-05	1
PID1	1.05563	0.001682	3.04e-05	1
OR9A4	1.27097	0.001696	3.07e-05	1
C6orf25	1.20729	0.001701	3.09e-05	1
AGPAT3	1.21714	0.001733	3.16e-05	1
C15orf26	1.09087	0.001743	3.18e-05	1
TREM1	1.18315	0.001746	3.2e-05	1
RBMS1	1.1655	0.001777	3.26e-05	1
KLK10	1.19289	0.001784	3.28e-05	1
DTYMK	1.2207	0.001786	3.29e-05	1
HOMER3	1.22354	0.001871	3.46e-05	1
RPS6KA2	1.1443	0.001872	3.48e-05	1
CD83	1.10803	0.001913	3.58e-05	1
ABCC1	1.24813	0.001914	3.56e-05	1
NR4A2	1.02208	0.001915	3.57e-05	1
TAGLN2	1.11932	0.001962	3.7e-05	1
FAM20C	1.23153	0.001978	3.74e-05	1
KCNV2	1.16374	0.002037	3.86e-05	1
ANKRD33	1.19904	0.00205	3.9e-05	1
DOK3	1.20613	0.002051	3.91e-05	1
RAB6B	1.07701	0.002055	3.9e-05	1
F8A1	1.26263	0.002058	3.93e-05	1
RNASE2	1.1202	0.002112	4.06e-05	1
15E1.2	1.24177	0.00212	4.08e-05	1
SNF1LK	1.07793	0.002122	4.1e-05	1
CUGBP1	1.27812	0.002131	4.12e-05	1
C5orf35	1.19918	0.002135	4.15e-05	1
RPS6KB2	1.22669	0.002167	4.22e-05	1
LOC391157	1.12108	0.00217	4.24e-05	1
GLB1L	1.25739	0.002198	4.3e-05	1
CCL3	1.0755	0.002244	4.41e-05	1
TNFSF8	1.18737	0.002247	4.43e-05	1
CGI-96	1.23259	0.002247	4.41e-05	1
MAD2L1BP	1.10241	0.002247	4.44e-05	1
ETFB	1.26263	0.002271	4.5e-05	1
PRPF6	1.24922	0.002295	4.55e-05	1
C14orf118	1.24208	0.002345	4.66e-05	1
EIF4EBP1	1.28966	0.002353	4.69e-05	1
ACSBG1	1.0653	0.002454	4.91e-05	1
KIAA1875	1.11882	0.002468	4.95e-05	1
FLJ37538	1.04723	0.002515	5.06e-05	1
MUC20	1.13058	0.002523	5.08e-05	1
STK17B	1.16673	0.002534	5.14e-05	1
SLC19A1	1.28403	0.002538	5.14e-05	1
NNT	1.01092	0.002539	5.13e-05	1
HBA1	1.16932	0.00255	5.19e-05	1
ATP6V0D1	1.27796	0.002581	5.26e-05	1
C19orf59	1.21877	0.002597	5.3e-05	1
RASIP1	1.21242	0.002634	5.39e-05	1
TCF20	1.21536	0.002688	5.51e-05	1
SIVA1	1.24719	0.00271	5.6e-05	1
IMPA2	1.25345	0.002738	5.67e-05	1
FGD4	1.29735	0.002744	5.72e-05	1
ZNF385	1.15808	0.002746	5.71e-05	1
CLSTN1	1.20308	0.002751	5.7e-05	1
SLC24A3	1.06247	0.002784	5.81e-05	1
CD302	1.14692	0.002794	5.84e-05	1
S100A9	1.2213	0.002831	5.96e-05	1
PEX11G	1.22579	0.002835	5.96e-05	1
FYN	1.17564	0.002842	6.01e-05	1
NOLA1	1.13173	0.002846	6.01e-05	1
ZMAT5	1.22654	0.002868	6.09e-05	1
SLC2A9	1.24208	0.002977	6.33e-05	1
FLJ31818	1.21183	0.002984	6.36e-05	1
TSC22D3	1.17952	0.002998	6.41e-05	1
NLRP2	1.0457	0.003082	6.6e-05	1
MATR3	1.25251	0.003125	6.7e-05	1
CACYBP	1.20178	0.003272	7.04e-05	1
CAPS	1.00402	0.003296	7.1e-05	1
AHNAK	1.23762	0.003309	7.15e-05	1
SH3BP2	1.23289	0.003335	7.22e-05	1
MRPL43	1.08378	0.003373	7.31e-05	1
CHURC1	1.07898	0.00339	7.4e-05	1
CECR6	1.19875	0.003392	7.37e-05	1
DENND1A	1.21832	0.003394	7.39e-05	1
HOXB2	1.13327	0.003483	7.63e-05	1
FBN2	1.14155	0.003608	7.94e-05	1
GRN	1.1805	0.003611	7.93e-05	1
MUC1	1.2285	0.003661	8.07e-05	1
GALNACT-2	1.16604	0.003673	8.13e-05	1
CD163	1.21477	0.003676	8.12e-05	1
VNN2	1.06451	0.003679	8.16e-05	1
HSPC159	1.10816	0.003689	8.2e-05	1
C1QC	1.19104	0.00372	8.29e-05	1
ZDHHC1	1.16455	0.003725	8.31e-05	1
IL6R	1.18708	0.003836	8.58e-05	1
LRRC25	1.25723	0.003867	8.7e-05	1
GNB4	1.09075	0.003869	8.67e-05	1
ANAPC2	1.08507	0.003871	8.69e-05	1
KISS1R	1.14705	0.003901	8.79e-05	1
EMP1	1.03993	0.003911	8.83e-05	1
LOC51136	1.17619	0.00398	9.01e-05	1
CECR1	1.21862	0.004001	9.07e-05	1
CTSZ	1.02145	0.004046	9.21e-05	1
SSR3	1.18133	0.004134	9.43e-05	1
UNC119	1.17827	0.004154	9.51e-05	1
KLKB1	1.17938	0.004161	9.51e-05	1
CALML4	1.17536	0.004185	9.6e-05	1
DRD3	1.07596	0.004216	9.69e-05	1
DPAGT1	1.17869	0.004307	9.94e-05	1
CDC42EP2	1.05219	0.004311	9.93e-05	1
OPLAH	1.2655	0.004411	0.0001022	1
GCH1	1.2288	0.004418	0.0001026	1
CD300C	1.12562	0.004458	0.0001039	1
C21orf59	1.15835	0.004465	0.0001039	1
CDA	1.2273	0.004548	0.0001062	1
CLEC12A	1.03659	0.004555	0.0001068	1
IHPK2	1.18147	0.004556	0.0001066	1
BCR	1.17288	0.00465	0.0001096	1
MMRN1	1.08213	0.004665	0.0001102	1
QSCN6	1.2332	0.004668	0.0001105	1
MAFB	1.17357	0.004743	0.0001124	1
SLC43A2	1.27081	0.004773	0.0001134	1
C14orf80	1.2025	0.004794	0.0001141	1
TMEM158	1.03029	0.004858	0.0001158	1
KLRA1	1.14995	0.004877	0.000117	1
ID1	1.27926	0.004877	0.0001167	1
OR10G8	1.05197	0.004996	0.0001203	1
TNFRSF12A	1.14508	0.005018	0.0001212	1
TBC1D17	1.00766	0.005025	0.0001212	1
ELMO1	1.11123	0.005054	0.0001228	1
ELMO2	1.16863	0.005066	0.0001226	1
CKB	1.10583	0.005071	0.0001234	1
LCN2	1.10546	0.005074	0.000124	1
NUMA1	1.0798	0.005082	0.0001239	1
LOC126147	1.14155	0.005086	0.0001245	1
AKT1S1	1.20279	0.005111	0.0001253	1
SYNGR1	1.13999	0.005134	0.0001264	1
ZNF655	1.20236	0.005139	0.0001263	1
CYFIP1	1.17925	0.005209	0.0001291	1
OLIG1	1.16591	0.005214	0.000129	1
IL1RN	1.1744	0.005233	0.00013	1
PCDHAC2	1.22564	0.005287	0.0001315	1
NEDD9	1.15168	0.005299	0.0001321	1
AFMID	1.22519	0.005357	0.0001338	1
MAF1	1.207	0.005373	0.0001344	1
LOC441168	1.24301	0.005409	0.0001356	1
TREML1	1.15902	0.005424	0.0001362	1
DMXL2	1.20584	0.005562	0.0001399	1
D4S234E	1.10558	0.005563	0.0001402	1
SLC44A1	1.25929	0.005569	0.0001406	1
RBM4	1.13817	0.005613	0.0001419	1
APOBEC3F	1.17137	0.005705	0.0001445	1
ATP1B3	1.2213	0.00582	0.0001477	1
TPM1	1.08413	0.005912	0.0001506	1
SLC2A8	1.18161	0.005951	0.0001518	1
GP5	1.11086	0.005997	0.0001533	1
FGF18	1.09902	0.006012	0.0001539	1
FBXL8	1.10668	0.006041	0.0001549	1
STYXL1	1.20005	0.006065	0.0001561	1
OLFM1	1.06918	0.006102	0.0001573	1
TRIM58	1.11222	0.006104	0.0001577	1
CPM	1.20048	0.00611	0.0001581	1
SLC27A6	1.08719	0.006149	0.0001594	1
FEN1	1.22459	0.006158	0.0001599	1
TLR2	1.17633	0.006217	0.0001617	1
ENTPD1	1.25992	0.006307	0.0001643	1
ROCK1	1.11907	0.006314	0.0001648	1
HMOX1	1.20934	0.006335	0.0001656	1
HIATL2	1.13225	0.006353	0.0001664	1
C10orf26	1.23548	0.006417	0.0001683	1
ZDHHC16	1.0983	0.006423	0.0001688	1
GRHL1	1.0144	0.006529	0.0001719	1
GLT25D2	1.01854	0.00666	0.0001756	1
FAM98B	1.1443	0.006709	0.0001778	1
DHRS9	1.11049	0.006718	0.0001775	1
PAEP	1.0929	0.006719	0.0001778	1
AP1GBP1	1.21374	0.006883	0.0001831	1
HSD17B11	1.07677	0.006891	0.0001836	1
B3GAT1	1.18864	0.006958	0.0001857	1
CGI-38	1.01112	0.007003	0.0001872	1
SNCB	1.1374	0.00709	0.0001899	1
NUDT16P	1.17055	0.00712	0.0001913	1
VNN3	1.15607	0.007121	0.000191	1
C17orf55	1.10644	0.007131	0.0001919	1
ARSB	1.23001	0.007136	0.0001924	1
DUSP1	1.10939	0.007158	0.0001936	1
GLIPR1	1.19232	0.00716	0.0001933	1
TSCOT	1.24363	0.007187	0.0001947	1
TTLL3	1.19133	0.007209	0.0001956	1
EFNA3	1.1773	0.007235	0.0001967	1
TPST2	1.19546	0.007395	0.0002017	1
ATP2A3	1.03381	0.00749	0.0002046	1
DUSP22	1.20963	0.007545	0.0002065	1
C3AR1	1.15075	0.007557	0.0002071	1
TSPAN33	1.16482	0.007734	0.0002127	1
ASGR1	1.26167	0.007777	0.0002142	1
HLA-DRB4	1.10779	0.007801	0.0002152	1
GRINA	1.13688	0.007816	0.000216	1
LMNA	1.16387	0.007837	0.0002173	1
MDM4	1.04015	0.007838	0.0002169	1
ZFX	1.16158	0.007871	0.0002186	1
TRIB1	1.24797	0.007927	0.0002205	1
IBRDC3	1.09661	0.008033	0.0002252	1
IFT122	1.16741	0.008039	0.0002258	1
WWP2	1.24254	0.008042	0.0002251	1
SNRPN	1.11037	0.008049	0.000225	1
HES6	1.07319	0.008055	0.0002273	1
PHLDB3	1.11732	0.008065	0.0002247	1
RB1	1.1632	0.008076	0.0002283	1
GPAA1	1.09926	0.008105	0.0002298	1
KYNU	1.19175	0.008125	0.0002311	1
BLVRB	1.11086	0.00813	0.0002309	1
TNFAIP6	1.10632	0.0082	0.0002336	1
ISY1	1.11957	0.008214	0.0002344	1
ABCD1	1.03821	0.008262	0.0002361	1
PRKDC	1.10387	0.008266	0.0002366	1
TNRC6C	1.17675	0.008284	0.0002375	1
RP2	1.13148	0.008312	0.0002387	1
FBXL5	1.23747	0.008457	0.0002436	1
NR2F6	1.20351	0.008507	0.0002454	1
FAM129B	1.24549	0.008531	0.0002465	1
TOM1L2	1.17883	0.008545	0.0002477	1
SCARB1	1.16877	0.008556	0.0002476	1
PLAUR	1.21095	0.008567	0.0002491	1
TMEM144	1.10791	0.008575	0.0002497	1
MKNK2	1.13469	0.008577	0.000249	1
CTDSPL	1.12423	0.008713	0.0002541	1
PIGA	1.19403	0.008888	0.00026	1
SGSH	1.1755	0.009119	0.0002672	1
DEFA4	1.2387	0.009167	0.000269	1
RCN3	1.18666	0.009201	0.0002704	1
AXUD1	1.24363	0.009205	0.0002714	1
IRAK3	1.23289	0.00921	0.0002711	1
PIGQ	1.19076	0.009473	0.0002801	1
PDGFRB	1.07365	0.009636	0.0002858	1
RENBP	1.20934	0.009856	0.0002937	1
SELP	1.03875	0.009985	0.000298	1
C6orf21	1.05219	0.01018	0.0003052	1
MOSC1	1.13186	0.01022	0.0003069	1
SH3KBP1	1.0408	0.01027	0.0003117	1
CEACAM8	1.04362	0.01027	0.0003112	1
FAM55C	1.06998	0.01027	0.0003088	1
HAS3	1.21907	0.01027	0.0003091	1
C1orf38	1.11123	0.01027	0.0003096	1
GZMM	1.06428	0.01028	0.0003105	1
LRP1	1.20351	0.01028	0.0003124	1
ENSA	1.16496	0.01029	0.0003111	1
BAT3	1.20569	0.01036	0.0003151	1
GSTM4	1.06304	0.01037	0.000316	1
HNRPK	1.16618	0.01044	0.000319	1
ASGR2	1.21109	0.01053	0.0003229	1
CD79A	1.03423	0.01055	0.0003239	1
KLF6	1.1274	0.01059	0.0003257	1
PLXND1	1.14613	0.01079	0.0003322	1
AKAP10	1.18526	0.0108	0.0003329	1
MDN1	1.19048	0.01085	0.0003366	1
FLJ37396	1.07262	0.01086	0.0003364	1
HADHA	1.24316	0.01087	0.000336	1
SERPINB8	1.17841	0.01088	0.0003359	1
NFKBIB	1.14181	0.01097	0.0003413	1
CUEDC1	1.18301	0.01119	0.0003486	1
GABARAP	1.1162	0.01128	0.0003517	1
PPM1A	1.19861	0.01135	0.0003546	1
TMOD1	1.09397	0.01135	0.0003557	1
TOP1MT	1.15367	0.01136	0.0003553	1
F5	1.19646	0.01155	0.0003624	1
PFKFB4	1.25992	0.01164	0.0003669	1
ZNF784	1.15487	0.01164	0.0003674	1
CCDC106	1.10387	0.01164	0.0003678	1
TIMM10	1.10011	0.01165	0.0003667	1
CLMN	1.22234	0.01166	0.0003665	1
LY9	1.23962	0.01166	0.0003696	1
GP9	1.14469	0.01171	0.0003716	1
RAB27A	1.22249	0.01174	0.0003732	1
TAPBPL	1.19104	0.01178	0.0003749	1
FOLR2	1.19646	0.01183	0.0003769	1
TLR6	1.25188	0.01196	0.0003823	1
RDH8	1.17925	0.01197	0.0003822	1
TNF	1.08073	0.01205	0.0003857	1
NAT8B	1.07204	0.01228	0.0003936	1
C20orf55	1.2444	0.01231	0.0003957	1
LYZ	1.09254	0.01232	0.0003955	1
PTS	1.24254	0.01232	0.0003971	1
ING3	1.18694	0.01247	0.0004024	1
HEXDC	1.0686	0.01247	0.0004036	1
WDR68	1.20904	0.01248	0.0004033	1
MGC50811	1.21892	0.01256	0.000407	1
CCRN4L	1.15554	0.01267	0.0004117	1
AZU1	1.21374	0.01274	0.0004151	1
C5AR1	1.21344	0.01274	0.0004145	1
DYSF	1.13353	0.01275	0.0004165	1
LOC728689	1.14574	0.01297	0.000425	1
C8orf55	1.17952	0.01308	0.0004299	1
THOC5	1.16918	0.01309	0.0004306	1
GUCY1A3	1.08096	0.01309	0.0004312	1
GLYATL2	1.1202	0.01313	0.0004334	1
HIST1H2AC	1.001	0.01315	0.0004345	1
DKFZp434N035	1.19104	0.01316	0.0004355	1
SETD3	1.207	0.01317	0.0004363	1
IL12RB1	1.15234	0.01324	0.0004392	1
CRTC1	1.0304	0.01329	0.0004416	1
FLJ22531	1.11173	0.01329	0.0004423	1
TMEM93	1.19303	0.01331	0.0004433	1
FLJ33790	1.11025	0.01331	0.0004441	1
ZNF394	1.18036	0.01333	0.0004453	1
AP3S1	1.21448	0.01334	0.0004462	1
SSBP4	1.14797	0.01337	0.0004478	1
SLC29A1	1.17938	0.01347	0.0004518	1
PHC2	1.15996	0.01351	0.0004538	1
GNA15	1.25992	0.01372	0.0004612	1
SLC24A4	1.178	0.01372	0.0004621	1
INSIG1	1.15942	0.01374	0.0004638	1
RASSF4	1.20149	0.01374	0.0004646	1
CSTA	1.17869	0.01381	0.0004675	1
RNASE3	1.18878	0.01383	0.0004694	1
CCDC17	1.16795	0.01384	0.0004703	1
SORT1	1.19318	0.0139	0.0004732	1
TBC1D3	1.00492	0.01398	0.0004778	1
TLR4	1.15794	0.01399	0.0004774	1
POLA	1.13212	0.014	0.0004773	1
DYNLL2	1.1966	0.01402	0.0004816	1
EDG3	1.09397	0.01404	0.0004815	1
TELO2	1.12246	0.01405	0.0004805	1
TBC1D5	1.10681	0.01409	0.0004845	1
PHACS	1.00908	0.01436	0.0004944	1
MFSD7	1.14299	0.01453	0.0005018	1
SLC39A6	1.08425	0.01454	0.0005015	1
LOC124220	1.18779	0.01466	0.0005068	1
C3orf40	1.23062	0.01478	0.0005115	1
RAB32	1.18991	0.01489	0.000518	1
ABCA1	1.1562	0.0149	0.0005178	1
NCF4	1.22624	0.0149	0.0005172	1
VENTX	1.06338	0.01492	0.0005171	1
SLC31A2	1.17619	0.01498	0.0005228	1
ADAM10	1.14666	0.01499	0.0005224	1
EIF2AK1	1.1711	0.01499	0.0005239	1
ANKRD57	1.0618	0.01499	0.0005242	1
TPCN2	1.18343	0.01504	0.0005266	1
GM632	1.06952	0.01507	0.0005285	1
TNFAIP3	1.14312	0.01513	0.000532	1
ZNF777	1.15274	0.01514	0.0005318	1
DGCR6L	1.20265	0.0153	0.0005401	1
MRPS18A	1.21832	0.01539	0.0005454	1
FYTTD1	1.14377	0.01544	0.0005479	1
TARBP2	1.19332	0.01548	0.0005498	1
MGC70863	1.02838	0.01554	0.0005534	1
BST1	1.0805	0.01555	0.0005532	1
ACTR3B	1.19617	0.01557	0.0005553	1
TNFSF4	1.10963	0.01573	0.0005629	1
PER1	1.10632	0.01574	0.0005627	1
RNASE6	1.1632	0.016	0.0005742	1
USP36	1.17647	0.01602	0.000574	1
HERC3	1.14824	0.01609	0.0005781	1
SNCA	1.09745	0.01611	0.0005794	1
GNLY	1.06428	0.01617	0.0005823	1
ADAMTSL4	1.18779	0.01672	0.0006051	1
PRKAR2A	1.23198	0.01672	0.0006045	1
ALPL	1.14626	0.01685	0.0006108	1
PDPK1	1.19847	0.01686	0.0006117	1
ZNF467	1.24332	0.01691	0.0006144	1
SLC25A29	1.1241	0.01703	0.0006197	1
ARRDC2	1.21256	0.01704	0.0006207	1
TOP1	1.19674	0.01707	0.0006234	1
CDH23	1.23503	0.01708	0.0006244	1
TNRC5	1.14956	0.01714	0.0006273	1
CLEC5A	1.11495	0.01722	0.0006309	1
ARL2	1.19503	0.01723	0.0006321	1
IHPK1	1.21818	0.01735	0.0006383	1
EDARADD	1.06803	0.01735	0.0006391	1
DAPK1	1.19403	0.01735	0.0006398	1
ANKMY1	1.11807	0.01735	0.0006406	1
LOC645676	1.207	0.01738	0.0006423	1
LYPLA1	1.13688	0.01743	0.0006468	1
TNNI2	1.21566	0.01744	0.0006463	1
ALDH3B1	1.20019	0.01745	0.0006482	1
SLC26A11	1.15554	0.01751	0.0006512	1
WDR86	1.03498	0.01755	0.0006536	1
CDC42EP4	1.23213	0.01755	0.0006541	1
LAG3	1.0805	0.01758	0.0006563	1
HOMER2	1.08495	0.01762	0.0006592	1
MGST1	1.1334	0.01763	0.000659	1
SIPA1L1	1.13327	0.01764	0.0006606	1
PLCB1	1.13314	0.01784	0.0006693	1
MX2	1.11421	0.01791	0.0006732	1
ACTRT1	1.12587	0.01793	0.0006732	1
TMUB2	1.12765	0.01798	0.0006777	1
MC1R	1.10632	0.01799	0.0006773	1
CRK	1.21344	0.01804	0.0006807	1
MAP3K10	1.19147	0.01809	0.0006842	1
PACS1	1.14351	0.0181	0.0006835	1
ITSN1	1.19119	0.01817	0.0006887	1
CNTNAP5	1.1534	0.01818	0.0006883	1
KIR2DS5	1.01256	0.01833	0.0006965	1
ICA1	1.21389	0.01834	0.000696	1
SYTL4	1.08826	0.01836	0.0006985	1
KIR2DL4	1.03961	0.01839	0.0007003	1
LOC728744	1.15287	0.01839	0.000703	1
IER3	1.09902	0.0184	0.0007018	1
FUSIP1	1.19246	0.0184	0.0007024	1
KIAA1324L	1.10156	0.01854	0.0007096	1
LRG1	1.19275	0.01854	0.0007105	1
CA1	1.07181	0.01863	0.0007148	1
SMPDL3A	1.16645	0.01867	0.0007179	1
PCDHGB6	1.18189	0.01868	0.000719	1
PIK3C2A	1.04015	0.01869	0.0007176	1
C14orf58	1.23548	0.01869	0.0007205	1
GBGT1	1.21462	0.01876	0.0007249	1
TMPIT	1.23213	0.01885	0.0007289	1
RBM3	1.11982	0.01889	0.0007315	1
MAPK14	1.14587	0.0189	0.0007326	1
C21orf57	1.07423	0.01917	0.0007467	1
FADS3	1.04613	0.01938	0.0007556	1
SOD2	1.22459	0.01944	0.0007588	1
NLRP3	1.23107	0.01944	0.00076	1
ATG7	1.24549	0.01944	0.0007607	1
SLCO3A1	1.23153	0.01952	0.0007645	1
RABL2B	1.11334	0.01971	0.000773	1
ABL2	1.12108	0.01987	0.0007829	1
GAB2	1.20467	0.01988	0.0007816	1
AIFM3	1.23946	0.01995	0.0007869	1
LGR6	1.07828	0.01996	0.000788	1
MORC3	1.09027	0.02009	0.0007944	1
SPAG9	1.18273	0.0201	0.0007955	1
KCNJ16	1.17165	0.02017	0.0007994	1
KIAA0319L	1.17014	0.02019	0.0008008	1
NBL1	1.17606	0.02023	0.0008035	1
MAX	1.12918	0.02024	0.0008048	1
CLEC10A	1.15848	0.02028	0.0008071	1
TYMS	1.06975	0.02038	0.000812	1
GPR162	1.1956	0.02041	0.0008142	1
SOCS1	1.02512	0.02046	0.0008199	1
EMR1	1.18315	0.02047	0.0008176	1
KCNJ4	1.17028	0.02048	0.0008197	1
B3GNT2	1.13585	0.02049	0.0008238	1
RFC2	1.11607	0.0205	0.0008195	1
THEM4	1.03939	0.0205	0.0008224	1
TAGLN	1.06067	0.02051	0.0008237	1
NAPRT1	1.17481	0.02055	0.0008292	1
SLC25A19	1.17398	0.02055	0.0008282	1
CD74	1.0022	0.02059	0.0008316	1
KHSRP	1.19861	0.02076	0.0008395	1
LOC729049	1.21907	0.02078	0.0008428	1
ANK3	1.18259	0.02079	0.0008416	1
NSF	1.19746	0.02079	0.0008424	1
ST3GAL2	1.23503	0.02091	0.0008503	1
ST6GALNAC2	1.16198	0.02092	0.0008498	1
ING4	1.04341	0.021	0.000855	1
C15orf38	1.20265	0.02101	0.0008562	1
NOMO3	1.17938	0.02113	0.0008622	1
HIF1A	1.1197	0.02113	0.0008631	1
SNFT	1.18751	0.02127	0.0008696	1
ACSS2	1.20077	0.02132	0.0008725	1
GTPBP1	1.1162	0.02133	0.0008749	1
CD9	1.10717	0.02135	0.0008747	1
EMILIN2	1.22594	0.02138	0.0008779	1
SERPINB9	1.15513	0.02144	0.0008813	1
SPRYD5	1.04102	0.02155	0.0008871	1
SPATA2L	1.2025	0.02159	0.0008896	1
CTSD	1.23655	0.02169	0.0008946	1
TLE3	1.21743	0.02171	0.0008974	1
NT5M	1.09051	0.02173	0.0008972	1
FCF1	1.16727	0.02192	0.0009069	1
ZGPAT	1.05419	0.02194	0.0009089	1
TMEM25	1.15168	0.0221	0.0009206	1
PLK3	1.1443	0.02212	0.0009203	1
MAD1L1	1.13237	0.02213	0.0009199	1
SIL1	1.21847	0.02238	0.0009332	1
CXCL16	1.19389	0.02267	0.0009473	1
ATOX1	1.21168	0.02267	0.0009485	1
FXYD6	1.15955	0.02275	0.0009528	1
VRK3	1.15075	0.02304	0.000967	1
SSFA2	1.1805	0.02306	0.0009687	1
H1FX	1.13122	0.02313	0.0009727	1
UTRN	1.1538	0.02313	0.0009738	1
DGCR8	1.10988	0.02321	0.0009783	1
MTMR3	1.18133	0.0234	0.0009872	1
LTBR	1.16036	0.02378	0.001004	1
ZNF3	1.05865	0.02383	0.001008	1
NEDD1	1.14797	0.02386	0.001011	1
ZAK	1.16591	0.02387	0.00101	1
DMKN	1.08331	0.0241	0.001022	1
CENTA1	1.11136	0.02426	0.00103	1
MBNL1	1.1892	0.02439	0.001037	1
ZNF358	1.19546	0.02448	0.001044	1
DGAT2	1.21153	0.02468	0.001055	1
FHL3	1.17288	0.02486	0.001063	1
CTSF	1.16632	0.02495	0.001069	1
CHN2	1.22489	0.02495	0.001068	1
CAPG	1.16104	0.02498	0.001072	1
FAM14A	1.03659	0.0252	0.001084	1
KLF1	1.20453	0.02527	0.001088	1
LRRC6	1.13882	0.02555	0.001102	1
CACNG6	1.19303	0.02556	0.001102	1
FZD1	1.07089	0.02571	0.00111	1
ENTPD4	1.03896	0.02584	0.001117	1
GLDC	1.06667	0.02609	0.001129	1
FAM101B	1.08354	0.02612	0.001131	1
MT2A	1.17606	0.02628	0.001141	1
CCM2	1.20322	0.02647	0.00115	1
PPP1CA	1.15022	0.02652	0.00116	1
PNKD	1.153	0.02653	0.001154	1
TST	1.22085	0.02654	0.001162	1
C5orf32	1.10816	0.02654	0.001159	1
CRAT	1.19732	0.02655	0.001156	1
SIPA1	1.19546	0.02656	0.001159	1
CTNNB1	1.15433	0.02656	0.001158	1
PTPRM	1.01307	0.02674	0.001172	1
ACOT7	1.23107	0.02695	0.001184	1
TRPV4	1.18008	0.02696	0.001184	1
TMEM65	1.21462	0.02698	0.001183	1
USP19	1.12537	0.02706	0.001192	1
RRAS	1.19847	0.02711	0.001195	1
DIABLO	1.16455	0.02748	0.001214	1
OSCAR	1.17786	0.02749	0.001213	1
TJP3	1.15861	0.02756	0.001219	1
RARRES2	1.04603	0.02767	0.001226	1
ICAM4	1.14732	0.0277	0.001229	1
GRASP	1.07527	0.02784	0.001236	1
PPP2R3B	1.13199	0.02785	0.001238	1
GLT8D1	1.12435	0.02893	0.001291	1
MEF2A	1.07319	0.02895	0.001293	1
CPT1A	1.1989	0.0293	0.001312	1
MS4A3	1.04833	0.02977	0.001335	1
WNT5B	1.17952	0.02979	0.001343	1
TCF7	1.06022	0.02981	0.001343	1
RNF126	1.13546	0.02983	0.001342	1
PAQR4	1.21803	0.02989	0.001349	1
TRIM4	1.12057	0.0299	0.00135	1
TRIM9	1.18864	0.03029	0.001374	1
FAM91A1	1.05597	0.03032	0.001374	1
UNQ501	1.21996	0.03035	0.001372	1
C9orf79	1.13611	0.03041	0.001381	1
TKTL1	1.0609	0.03044	0.001383	1
ERCC2	1.18807	0.03046	0.001387	1
CDKAL1	1.16713	0.03057	0.001393	1
PIK3CB	1.15035	0.0306	0.001396	1
LGALS9	1.10877	0.03065	0.001401	1
MICAL2	1.14207	0.03066	0.001403	1
NRXN3	1.10865	0.0307	0.001409	1
PGD	1.20366	0.03072	0.001407	1
CCDC124	1.07701	0.03072	0.001408	1
SH2B1	1.10023	0.03083	0.001416	1
TTBK2	1.18357	0.03086	0.001419	1
KCNH3	1.05977	0.03087	0.001421	1
TMEM63C	1.17523	0.03093	0.001428	1
JAK1	1.05419	0.03096	0.001428	1
STK24	1.19332	0.03108	0.001436	1
PLA2G4A	1.10156	0.03149	0.001458	1
CMTM1	1.1288	0.03153	0.001464	1
UBOX5	1.19147	0.03176	0.001476	1
GGT1	1.1542	0.03189	0.001484	1
BCAT1	1.09457	0.03192	0.001486	1
ZFAND6	1.09397	0.03205	0.001494	1
AIFM1	1.17883	0.03219	0.001502	1
BLR1	1.21803	0.03239	0.001513	1
SPAG1	1.15754	0.0326	0.001524	1
SERPING1	1.04965	0.03262	0.001526	1
POLR2J	1.14416	0.03265	0.001529	1
KIAA2010	1.08944	0.03265	0.001532	1
RIN2	1.12765	0.03266	0.001531	1
NFE2	1.18175	0.03275	0.001538	1
IVNS1ABP	1.16104	0.03295	0.001549	1
CLIC1	1.07573	0.03339	0.001571	1
MAGED2	1.15207	0.03347	0.001577	1
GTF2H3	1.08873	0.03387	0.001598	1
PARVB	1.0469	0.03389	0.001601	1
RAP1A	1.0381	0.03394	0.001605	1
LAMB2	1.16414	0.03405	0.001613	1
ZRANB1	1.12867	0.03422	0.001624	1
GRK6	1.14995	0.03423	0.001623	1
KIF13A	1.18064	0.03444	0.001636	1
GNL1	1.17261	0.0348	0.001657	1
MGC72104	1.15247	0.03486	0.001664	1
PPAPDC3	1.21847	0.03489	0.001664	1
SLC26A6	1.16158	0.0349	0.001667	1
COPG2	1.07043	0.03491	0.001663	1
SLC2A6	1.16131	0.03521	0.001684	1
TSPAN3	1.0305	0.03527	0.001688	1
E2F2	1.17509	0.03553	0.001703	1
C16orf74	1.14025	0.03571	0.001713	1
RAB11FIP1	1.17883	0.03585	0.001721	1
CLTCL1	1.20019	0.0359	0.001725	1
AYTL1	1.05285	0.03603	0.001733	1
PCK2	1.17495	0.03668	0.001766	1
CHRNB3	1.16387	0.0367	0.001772	1
C7orf10	1.02407	0.03673	0.001775	1
AZIN1	1.1121	0.03675	0.001771	1
CUTL1	1.11669	0.0368	0.00178	1
DNASE1L1	1.15407	0.0369	0.001786	1
TAGAP	1.1485	0.03695	0.001792	1
FKBP1A	1.09457	0.03704	0.001798	1
DCD	1.17938	0.03705	0.0018	1
RAB34	1.13869	0.03718	0.001808	1
ACPP	1.14312	0.0374	0.001821	1
DAGLA	1.12347	0.0374	0.001822	1
SNRP70	1.13302	0.03744	0.001826	1
ITGB4	1.21743	0.03783	0.001847	1
CMTM4	1.18694	0.03813	0.001863	1
ITGB5	1.0502	0.0382	0.001868	1
FHL5	1.16401	0.03823	0.001872	1
WDR47	1.17	0.03835	0.001881	1
MCTP1	1.04921	0.03837	0.00188	1
LIN52	1.19332	0.03859	0.001895	1
TMEM38B	1.16482	0.0386	0.001898	1
CD86	1.19646	0.03861	0.001897	1
TUBA1A	1.15888	0.03896	0.001918	1
NR1H3	1.1489	0.03918	0.001932	1
BANF1	1.10363	0.03921	0.001932	1
OASL	1.08096	0.03949	0.001949	1
RXRB	1.06056	0.03997	0.001975	1
LBH	1.16795	0.04006	0.001981	1
BRI3BP	1.10461	0.04012	0.001986	1
CD300LB	1.1946	0.04015	0.001989	1
CCDC85B	1.17	0.04027	0.001997	1
UBE2J2	1.10939	0.04041	0.002007	1
C18orf10	1.09601	0.04076	0.002027	1
HIRIP3	1.13135	0.0408	0.00203	1
HPCAL1	1.21507	0.04092	0.002038	1
TOM1	1.06247	0.04099	0.002046	1
LRFN3	1.04395	0.04099	0.002047	1
CD79B	1.05452	0.041	0.002052	1
FAM119B	1.18511	0.04101	0.002054	1
POMT1	1.0353	0.04102	0.002045	1
DNAJC3	1.15768	0.04104	0.002052	1
TCN1	1.25676	0.04114	0.002062	1
GPBAR1	1.16279	0.04127	0.002071	1
ATP2A2	1.16904	0.04143	0.002082	1
FCAR	1.00675	0.04143	0.002084	1
TIMM8B	1.06735	0.04147	0.002082	1
DHRS13	1.11495	0.0416	0.002094	1
ATP6V0C	1.13921	0.04171	0.002104	1
PATZ1	1.15141	0.04171	0.002102	1
FLJ40113	1.00847	0.04172	0.002106	1
IMPDH1	1.16904	0.04207	0.002128	1
GAS2L1	1.03875	0.04245	0.002155	1
ZNF289	1.17014	0.04248	0.002154	1
CLEC4A	1.15009	0.04251	0.002159	1
TBXAS1	1.21344	0.04251	0.002161	1
SRXN1	1.12918	0.04282	0.002179	1
ITGAD	1.05197	0.04283	0.002182	1
IRS2	1.14929	0.0429	0.002187	1
MERTK	1.13856	0.0429	0.002195	1
CMTM5	1.04515	0.04292	0.002192	1
KCNK12	1.10047	0.04293	0.002198	1
JMY	1.12943	0.04293	0.002195	1
CCR1	1.10509	0.04294	0.002191	1
SQSTM1	1.09373	0.04308	0.002208	1
GALNT4	1.17925	0.04333	0.002225	1
TMCC3	1.12473	0.04337	0.002225	1
AVPI1	1.1558	0.04348	0.002234	1
TAF15	1.01513	0.04366	0.002246	1
SLC4A1	1.17716	0.04382	0.002256	1
UBB	1.12499	0.04391	0.002266	1
GRHL3	1.15942	0.04454	0.002301	1
SVIL	1.03295	0.04462	0.002307	1
B3GALTL	1.13276	0.0447	0.002315	1
C6orf64	1.14916	0.04472	0.002314	1
PRSSL1	1.02701	0.04501	0.002333	1
GLS2	1.16063	0.04502	0.002338	1
TADA3L	1.09769	0.04505	0.002337	1
SULT1A1	1.08237	0.04516	0.002349	1
GRB10	1.153	0.04548	0.002372	1
GFPT2	1.0898	0.04563	0.002384	1
MAGEB1	1.08307	0.04596	0.002408	1
HOXD3	1.15314	0.04597	0.00241	1
PDE4D	1.10668	0.04632	0.00243	1
NHP2L1	1.18036	0.04659	0.002447	1
CASZ1	1.17398	0.04692	0.002466	1
BAD	1.1999	0.04692	0.002468	1
HNMT	1.14495	0.04709	0.002479	1
MSH5	1.18022	0.04719	0.002487	1
L1TD1	1.12296	0.04765	0.002513	1
RTEL1	1.01698	0.04782	0.002527	1
RASSF2	1.18441	0.04784	0.002525	1
TP53I13	1.1279	0.04791	0.002535	1
LY6E	1.03455	0.04792	0.002534	1
SPCS3	1.07055	0.04795	0.002542	1
IGF1R	1.19019	0.04796	0.00254	1
FLJ22662	1.07504	0.04812	0.002553	1
PDCL	1.14456	0.04848	0.002577	1
SLC4A7	1.10011	0.04852	0.002576	1
JTB	1.11173	0.04886	0.002603	1
C6orf211	1.07365	0.0489	0.002612	1
C1orf80	1.03552	0.04891	0.002608	1
TSPAN1	1.14574	0.04892	0.002611	1
SLC11A1	1.06101	0.04917	0.002631	1
DDX39	1.02987	0.04924	0.002637	1
C11orf75	1.19818	0.04937	0.002646	1
ERMAP	1.22699	0.04963	0.002667	1
ACTA2	1.07354	0.04963	0.002669	1
TM6SF1	1.10387	0.04964	0.002665	1
ABTB1	1.17028	0.04965	0.002672	1
ZNF579	1.02543	0.04968	0.002665	1
PIK3AP1	0.999001	0.0348	0.001655	1
RPS4Y1	0.548546	2.81e-19	2.53e-23	-1
EIF1AY	0.591716	4.48e-19	2.02e-23	-1
JARID1D	0.64433	1.18e-18	1.6e-22	-1
CYorf15A	0.698324	1.02e-17	1.84e-21	-1
CNTNAP2	0.547645	1.47e-17	3.32e-21	-1
PRKY	0.720981	1.57e-17	4.25e-21	-1
CYorf15B	0.712251	6.17e-17	1.95e-20	-1
CCNT1	0.547645	2.25e-14	8.12e-18	-1
USP9Y	0.733138	2.04e-13	8.27e-17	-1
SPATA13	0.62383	8.74e-13	3.94e-16	-1
TAOK1	0.584795	2.31e-12	1.15e-15	-1
ZNF121	0.661376	4.1e-12	2.22e-15	-1
CLEC4F	0.687285	6.43e-12	3.77e-15	-1
TMSB4Y	0.831255	1.63e-11	1.1e-14	-1
DDX3Y	0.734754	1.67e-11	1.06e-14	-1
LOC400566	0.849618	3.89e-11	2.98e-14	-1
YTHDC1	0.722543	3.99e-11	2.87e-14	-1
C21orf81	0.666667	5.8e-11	4.71e-14	-1
GOLGA8A	0.604595	5.95e-11	5.1e-14	-1
POLR3G	0.673854	3.84e-10	3.63e-13	-1
UTY	0.795545	3.99e-10	3.6e-13	-1
AKAP7	0.628141	4.83e-10	4.79e-13	-1
MYOM2	0.985222	1.96e-09	2.03e-12	-1
ZNF679	0.826446	1.65e-08	2.01e-11	-1
ZNF785	0.676133	1.66e-08	1.88e-11	-1
KRT72	0.779423	1.67e-08	1.95e-11	-1
NFATC3	0.658328	2.89e-08	3.65e-11	-1
C20orf94	0.711744	3.07e-08	4.15e-11	-1
C6orf204	0.718907	3.09e-08	4.04e-11	-1
IL4R	0.728863	3.19e-08	4.6e-11	-1
YIPF5	0.734214	3.2e-08	4.47e-11	-1
PDK1	0.659631	4.42e-08	6.58e-11	-1
DKFZp686K16132	0.734214	4.74e-08	7.27e-11	-1
KIAA1604	0.673854	6.45e-08	1.02e-10	-1
C1GALT1	0.673401	6.52e-08	1.06e-10	-1
C17orf75	0.747384	6.82e-08	1.17e-10	-1
EEF1B2	0.734214	7.45e-08	1.31e-10	-1
CLEC2D	0.761035	7.87e-08	1.45e-10	-1
ELOVL7	0.723589	7.99e-08	1.44e-10	-1
PTPRC	0.818331	8.3e-08	1.57e-10	-1
ERGIC2	0.672043	9.23e-08	1.79e-10	-1
FLJ11292	0.69735	1.43e-07	3.03e-10	-1
ELA1	0.696379	1.44e-07	2.99e-10	-1
LRAP	0.753012	1.49e-07	3.23e-10	-1
MAPK8IP1	0.914913	1.83e-07	4.03e-10	-1
LOC731809	0.747384	2.55e-07	5.97e-10	-1
GBP3	0.729927	2.57e-07	6.27e-10	-1
GOLGA8B	0.748503	2.58e-07	5.93e-10	-1
DDX17	0.752445	2.6e-07	5.86e-10	-1
CENPK	0.779423	2.61e-07	6.23e-10	-1
PEX6	0.754148	2.64e-07	6.53e-10	-1
BCOR	0.705219	2.86e-07	7.34e-10	-1
PERQ1	0.771605	2.89e-07	7.55e-10	-1
GGTLA4	0.69979	4.77e-07	1.27e-09	-1
NSUN5B	0.70922	5.25e-07	1.42e-09	-1
FOXP1	0.749064	5.54e-07	1.52e-09	-1
SF1	0.812348	6.08e-07	1.7e-09	-1
POMZP3	0.75188	6.98e-07	1.98e-09	-1
GSTM1	0.952381	7.33e-07	2.12e-09	-1
C5orf28	0.713267	8.43e-07	2.55e-09	-1
FBXW7	0.773395	8.48e-07	2.52e-09	-1
NR1D2	0.761035	8.52e-07	2.5e-09	-1
PVALB	0.856898	8.85e-07	2.75e-09	-1
DNTTIP2	0.791766	8.9e-07	2.89e-09	-1
PTER	0.792393	9.11e-07	2.87e-09	-1
KIR2DL1	0.971817	9.6e-07	3.16e-09	-1
KLRC3	0.788644	1.22e-06	4.06e-09	-1
RPL10A	0.706215	1.39e-06	4.69e-09	-1
DMXL1	0.750751	1.52e-06	5.28e-09	-1
AMMECR1	0.771605	1.53e-06	5.23e-09	-1
RSAD2	0.763942	1.93e-06	6.96e-09	-1
PTGS2	0.841751	1.93e-06	6.87e-09	-1
KIAA0564	0.705219	1.95e-06	6.87e-09	-1
ZBTB11	0.726216	2.1e-06	7.67e-09	-1
LOC400986	0.876424	2.36e-06	8.82e-09	-1
OR1Q1	0.840336	2.36e-06	8.94e-09	-1
ZNF181	0.733676	2.88e-06	1.11e-08	-1
PHF20L1	0.742942	2.89e-06	1.12e-08	-1
GLRX2	0.766284	2.94e-06	1.15e-08	-1
FRMD3	0.759301	3.25e-06	1.29e-08	-1
ZNF684	0.727273	3.26e-06	1.31e-08	-1
PDZK1IP1	0.86881	3.28e-06	1.33e-08	-1
ADAM28	0.710732	3.4e-06	1.4e-08	-1
PTGDS	0.766284	4.36e-06	1.83e-08	-1
LOC389834	0.794281	4.59e-06	1.94e-08	-1
KCNJ2	0.865052	4.62e-06	1.98e-08	-1
ZNF641	0.74239	4.65e-06	2.01e-08	-1
ZNF543	0.745156	4.77e-06	2.09e-08	-1
KLRF1	0.721501	4.82e-06	2.13e-08	-1
PF4V1	0.884173	4.96e-06	2.24e-08	-1
CSTF3	0.721501	5e-06	2.28e-08	-1
YWHAE	0.744048	5.01e-06	2.24e-08	-1
CD248	0.773395	5.54e-06	2.55e-08	-1
FOS	0.888889	5.78e-06	2.71e-08	-1
CA2	0.793021	6.67e-06	3.16e-08	-1
MOBK1B	0.776398	6.76e-06	3.23e-08	-1
C3orf28	0.761615	6.8e-06	3.28e-08	-1
ZNF415	0.719942	6.83e-06	3.33e-08	-1
ZFP30	0.714796	7.34e-06	3.61e-08	-1
PPP1R15B	0.81367	7.46e-06	3.7e-08	-1
C9orf85	0.725163	7.77e-06	3.89e-08	-1
HBS1L	0.77101	7.99e-06	4.03e-08	-1
AKAP1	0.712758	8.01e-06	4.08e-08	-1
MGC11102	0.747384	8.39e-06	4.31e-08	-1
HIST1H4H	0.846024	8.46e-06	4.39e-08	-1
BMP2K	0.816993	8.92e-06	4.75e-08	-1
EGR2	0.908265	8.96e-06	4.73e-08	-1
C8orf13	0.76746	9.92e-06	5.37e-08	-1
CAMK2B	0.798085	1.02e-05	5.54e-08	-1
IFI44L	0.879507	1.08e-05	5.96e-08	-1
FOSB	0.931099	1.14e-05	6.3e-08	-1
TXNL1	0.732064	1.19e-05	6.64e-08	-1
SFRS11	0.725163	1.21e-05	6.81e-08	-1
RANBP2	0.733138	1.31e-05	7.54e-08	-1
SLC2A5	0.768049	1.31e-05	7.52e-08	-1
ZNF404	0.76746	1.32e-05	7.51e-08	-1
ZBTB41	0.762195	1.48e-05	8.58e-08	-1
C22orf34	0.755287	1.5e-05	8.86e-08	-1
TRIM13	0.754148	1.55e-05	9.2e-08	-1
ZNF502	0.759878	1.71e-05	1.02e-07	-1
ARHGAP18	0.813008	1.82e-05	1.1e-07	-1
KCNG1	0.803859	2.01e-05	1.23e-07	-1
ABCA2	0.772798	2.02e-05	1.24e-07	-1
LRRN3	0.766871	2.11e-05	1.33e-07	-1
RAB33B	0.770416	2.11e-05	1.32e-07	-1
LOC401622	0.728332	2.12e-05	1.32e-07	-1
ATRX	0.782473	2.13e-05	1.32e-07	-1
ENPP5	0.793651	2.27e-05	1.46e-07	-1
DAPP1	0.740741	2.29e-05	1.45e-07	-1
ESCO1	0.742942	2.59e-05	1.67e-07	-1
SMARCC2	0.845309	2.77e-05	1.82e-07	-1
ZNF75A	0.763942	2.78e-05	1.8e-07	-1
KLHL28	0.731529	2.84e-05	1.88e-07	-1
METTL2A	0.711744	2.87e-05	1.91e-07	-1
PILRB	0.985222	2.87e-05	1.93e-07	-1
DPYSL4	0.998004	2.9e-05	1.99e-07	-1
METTL7A	0.801925	2.9e-05	1.98e-07	-1
WNT10B	0.776398	2.91e-05	1.97e-07	-1
Sep-07	0.755858	2.92e-05	2.02e-07	-1
NUP43	0.886525	2.93e-05	2.02e-07	-1
FBXO11	0.736377	3.09e-05	2.16e-07	-1
ATN1	0.784929	3.11e-05	2.19e-07	-1
FSTL1	0.925069	3.56e-05	2.53e-07	-1
NRCAM	0.759301	3.56e-05	2.52e-07	-1
ID3	0.799361	3.57e-05	2.56e-07	-1
FASLG	0.803213	3.6e-05	2.6e-07	-1
SPPL2B	0.76746	3.61e-05	2.63e-07	-1
HIST1H2BH	0.789266	3.61e-05	2.62e-07	-1
NFAT5	0.85034	3.69e-05	2.73e-07	-1
FAM100A	0.84674	3.71e-05	2.72e-07	-1
FBXO4	0.776398	3.93e-05	2.92e-07	-1
FAM122B	0.726216	4.01e-05	3e-07	-1
USP6	0.778816	4.05e-05	3.07e-07	-1
FCHO2	0.87184	4.06e-05	3.06e-07	-1
C1orf9	0.87108	4.41e-05	3.38e-07	-1
PDDC1	0.75643	4.43e-05	3.38e-07	-1
CNN3	0.753012	4.5e-05	3.47e-07	-1
BBS10	0.783085	4.7e-05	3.65e-07	-1
OXTR	0.830565	4.79e-05	3.74e-07	-1
PTPN2	0.888099	4.95e-05	3.88e-07	-1
NOTCH2NL	0.747943	4.97e-05	3.92e-07	-1
HIST1H4E	0.796178	5.37e-05	4.26e-07	-1
TCL1A	0.831947	5.53e-05	4.42e-07	-1
LOC401623	0.738552	5.73e-05	4.6e-07	-1
DACT1	0.994036	6.48e-05	5.28e-07	-1
CD3D	0.815661	6.54e-05	5.37e-07	-1
ZMAT1	0.754717	6.6e-05	5.44e-07	-1
SLC16A11	0.769823	6.81e-05	5.65e-07	-1
RPL14	0.792393	7.09e-05	5.91e-07	-1
IL1RAP	0.796813	7.28e-05	6.1e-07	-1
ZNF420	0.821693	7.39e-05	6.26e-07	-1
C7orf36	0.733676	7.41e-05	6.25e-07	-1
OTOF	0.911577	7.52e-05	6.4e-07	-1
LOC729853	0.834725	7.59e-05	6.5e-07	-1
MOBKL1A	0.799361	7.8e-05	6.71e-07	-1
SFMBT2	0.878735	8.3e-05	7.18e-07	-1
SRPK2	0.788022	8.58e-05	7.47e-07	-1
PMS2L2	0.823045	8.7e-05	7.65e-07	-1
CR2	0.763942	8.74e-05	7.64e-07	-1
KRT73	0.873362	8.78e-05	7.75e-07	-1
HRB	0.759878	9.56e-05	8.53e-07	-1
RBM12B	0.789266	9.57e-05	8.5e-07	-1
LAIR2	0.899281	9.69e-05	8.69e-07	-1
REV3L	0.757002	0.0001001	9.02e-07	-1
SLC40A1	0.835422	0.0001037	9.39e-07	-1
ATHL1	0.848176	0.0001037	9.44e-07	-1
DNHD1	0.765111	0.000104	9.52e-07	-1
ZNF813	0.742942	0.000104	9.57e-07	-1
LSM6	0.826446	0.0001129	1.04e-06	-1
C20orf149	0.863558	0.0001159	1.08e-06	-1
SSPN	0.76746	0.0001163	1.08e-06	-1
MYLK	0.831255	0.0001227	1.15e-06	-1
WDSOF1	0.791139	0.0001233	1.16e-06	-1
DLAT	0.788022	0.0001292	1.22e-06	-1
RHPN1	0.829876	0.0001338	1.28e-06	-1
CHD3	0.771605	0.0001342	1.29e-06	-1
CXorf53	0.825083	0.0001342	1.28e-06	-1
VAPA	0.763359	0.000137	1.33e-06	-1
SLTM	0.857633	0.0001375	1.33e-06	-1
ETAA1	0.773395	0.0001387	1.35e-06	-1
MGC12965	0.84317	0.0001387	1.36e-06	-1
SCAND2	0.798085	0.0001596	1.57e-06	-1
PTPRK	0.762195	0.0001773	1.76e-06	-1
CD164	0.800641	0.0001774	1.77e-06	-1
PIK3CA	0.775194	0.0001776	1.78e-06	-1
NBEA	0.78125	0.0001781	1.76e-06	-1
HIST1H2BE	0.855432	0.0001808	1.82e-06	-1
OR1F1	0.802568	0.0001816	1.83e-06	-1
RMI1	0.775194	0.0001817	1.84e-06	-1
RPSA	0.865052	0.0001926	1.96e-06	-1
SIRT4	0.740192	0.0001947	1.99e-06	-1
TMEM107	0.792393	0.0001948	2e-06	-1
ARL13B	0.801925	0.0001965	2.03e-06	-1
GP6	0.877193	0.0001974	2.05e-06	-1
MYST4	0.784314	0.0002031	2.12e-06	-1
LRRFIP1	0.910747	0.0002065	2.17e-06	-1
OBSCN	0.841043	0.0002088	2.2e-06	-1
DCUN1D4	0.845309	0.0002358	2.5e-06	-1
TMEM16H	0.805153	0.0002411	2.57e-06	-1
PHOSPHO2	0.794913	0.0002421	2.59e-06	-1
C13orf7	0.758725	0.0002434	2.61e-06	-1
TMEM16J	0.883392	0.0002481	2.67e-06	-1
CACHD1	0.786782	0.0002587	2.81e-06	-1
MFAP3L	0.8285	0.0002589	2.8e-06	-1
SPIN1	0.793021	0.0002651	2.89e-06	-1
NT5C3	0.801282	0.0002745	3.01e-06	-1
TP53	0.846024	0.0002798	3.08e-06	-1
MLL3	0.804505	0.000294	3.25e-06	-1
HIST1H2AG	0.884956	0.0002946	3.27e-06	-1
MLH3	0.801925	0.0003002	3.34e-06	-1
LY75	0.861326	0.0003213	3.59e-06	-1
C11orf35	0.901713	0.0003239	3.64e-06	-1
TRNT1	0.774593	0.0003271	3.69e-06	-1
RPL7	0.766284	0.0003299	3.73e-06	-1
AEBP1	0.749625	0.0003303	3.77e-06	-1
ZNF230	0.778816	0.0003335	3.82e-06	-1
FAM43A	0.830565	0.0003356	3.87e-06	-1
TDRD1	0.792393	0.0003366	3.87e-06	-1
LRBA	0.813008	0.000342	3.99e-06	-1
C1orf82	0.789889	0.0003422	3.98e-06	-1
C19orf33	0.985222	0.0003432	3.98e-06	-1
KIAA1033	0.809061	0.0003477	4.08e-06	-1
C20orf59	0.85034	0.000348	4.1e-06	-1
BCL2L1	0.97371	0.0003535	4.21e-06	-1
TSN	0.863558	0.0003568	4.28e-06	-1
HRASLS	0.901713	0.0003575	4.27e-06	-1
CCL28	0.746269	0.0003605	4.34e-06	-1
NARG2	0.801282	0.000361	4.36e-06	-1
FMO2	0.843882	0.0003644	4.42e-06	-1
PTMA	0.789266	0.0003702	4.51e-06	-1
CXCR7	0.754717	0.0003776	4.63e-06	-1
IL12RB2	0.820345	0.0003778	4.62e-06	-1
LENG8	0.854701	0.0004026	4.96e-06	-1
LMNB1	0.919963	0.0004033	4.98e-06	-1
CHD7	0.788644	0.0004081	5.06e-06	-1
TAS2R10	0.76864	0.0004105	5.11e-06	-1
ZNF642	0.78125	0.0004231	5.28e-06	-1
C1orf56	0.811688	0.0004239	5.31e-06	-1
PMS1	0.78064	0.0004259	5.38e-06	-1
TMEM45B	0.832639	0.0004261	5.36e-06	-1
ITGB1BP1	0.834028	0.0004266	5.42e-06	-1
PURA	0.757576	0.0004273	5.41e-06	-1
FKBP3	0.788022	0.0004276	5.48e-06	-1
KCNK17	0.793651	0.0004281	5.5e-06	-1
ZNF683	0.935454	0.0004535	5.87e-06	-1
CAST	0.863558	0.0004537	5.89e-06	-1
ZNF491	0.759301	0.000454	5.91e-06	-1
CEP57	0.774593	0.0004547	5.94e-06	-1
GRM2	0.815661	0.0004568	6.01e-06	-1
COL4A3	0.788644	0.0004583	6.01e-06	-1
DNMT3A	0.88574	0.0004708	6.22e-06	-1
RGS17	0.766284	0.0004735	6.28e-06	-1
CDC2L2	0.922509	0.0004805	6.39e-06	-1
SPAG16	0.762777	0.0005064	6.76e-06	-1
DCHS1	0.78125	0.0005088	6.81e-06	-1
FLJ36208	0.87184	0.000514	6.9e-06	-1
RAB18	0.831255	0.0005211	7.02e-06	-1
USH1G	0.898473	0.0005254	7.11e-06	-1
IRF5	0.943396	0.0005254	7.13e-06	-1
NFIB	0.95057	0.000534	7.37e-06	-1
MEIS1	0.812348	0.0005356	7.36e-06	-1
AFF3	0.770416	0.0005358	7.3e-06	-1
NUAK2	0.830565	0.0005362	7.35e-06	-1
UQCRH	0.780031	0.0005376	7.34e-06	-1
MCMDC1	0.789889	0.0005397	7.47e-06	-1
ZNF658	0.843882	0.0005419	7.52e-06	-1
NOG	0.816327	0.000555	7.78e-06	-1
IFIT1	0.881834	0.0005565	7.78e-06	-1
CISH	0.827815	0.0005587	7.86e-06	-1
CEL	0.882613	0.0005588	7.88e-06	-1
CCNL1	0.8	0.0005644	7.99e-06	-1
TMEM51	0.87108	0.0005736	8.15e-06	-1
FBLN2	0.816993	0.0005864	8.38e-06	-1
FLJ12331	0.788022	0.0005872	8.37e-06	-1
POT1	0.840336	0.0005935	8.54e-06	-1
UGCG	0.805153	0.0005936	8.56e-06	-1
TAPT1	0.784314	0.0005947	8.53e-06	-1
TSPYL2	0.865801	0.0005963	8.66e-06	-1
AHI1	0.771605	0.000598	8.65e-06	-1
ZNF135	0.766284	0.0006108	8.89e-06	-1
LARP2	0.76746	0.0006533	9.54e-06	-1
SURB7	0.863558	0.0006546	9.59e-06	-1
FGD2	0.94518	0.0006625	9.74e-06	-1
LMBRD1	0.829187	0.0006891	1.02e-05	-1
FAM63A	0.862813	0.0007028	1.05e-05	-1
RBBP6	0.783085	0.0007156	1.07e-05	-1
FLJ38973	0.831255	0.0007191	1.08e-05	-1
MAPK8IP3	0.806452	0.0007316	1.1e-05	-1
RG9MTD1	0.781861	0.0007621	1.15e-05	-1
YEATS4	0.784929	0.0007966	1.2e-05	-1
ZNF708	0.845309	0.0008076	1.22e-05	-1
LMOD3	0.861326	0.0008135	1.24e-05	-1
LDB2	0.819672	0.0008482	1.29e-05	-1
C2orf16	0.87184	0.0008719	1.33e-05	-1
MAP3K7IP2	0.812348	0.0008988	1.38e-05	-1
CTDSPL2	0.775795	0.0008997	1.38e-05	-1
TPM2	0.868056	0.0009047	1.4e-05	-1
CENTG2	0.822368	0.0009062	1.41e-05	-1
ZFP1	0.833333	0.0009225	1.44e-05	-1
CASP6	0.800641	0.000924	1.44e-05	-1
NEK1	0.794913	0.000924	1.45e-05	-1
EIF1AX	0.809061	0.0009285	1.46e-05	-1
GTF2H1	0.834028	0.000929	1.47e-05	-1
ZNF659	0.914913	0.0009297	1.46e-05	-1
KRT1	0.912409	0.0009534	1.52e-05	-1
LCMT2	0.773994	0.0009546	1.52e-05	-1
CYP51A1	0.862813	0.0009613	1.53e-05	-1
LARGE	0.821693	0.000969	1.56e-05	-1
CXorf20	0.878735	0.0009692	1.55e-05	-1
GAL3ST4	0.786164	0.0009917	1.6e-05	-1
SPON2	0.797448	0.0009969	1.61e-05	-1
HIST2H3C	0.917431	0.001002	1.62e-05	-1
TAF5L	0.825083	0.001019	1.65e-05	-1
AKAP9	0.84246	0.001038	1.69e-05	-1
C6orf27	0.854701	0.001058	1.73e-05	-1
JARID1C	0.934579	0.001071	1.75e-05	-1
LTK	0.84317	0.001083	1.78e-05	-1
ZNF616	0.810373	0.001093	1.8e-05	-1
TCEAL1	0.788022	0.001096	1.81e-05	-1
CLK4	0.788644	0.001096	1.84e-05	-1
OR2A1	0.874891	0.001099	1.83e-05	-1
KIR3DL2	0.877963	0.001099	1.83e-05	-1
GNPNAT1	0.78064	0.001137	1.92e-05	-1
ARL17P1	0.887311	0.001139	1.92e-05	-1
ZNF644	0.782473	0.001147	1.95e-05	-1
FLCN	0.911577	0.001154	1.96e-05	-1
GSTM2	0.8726	0.001155	1.97e-05	-1
IL7R	0.787402	0.001155	1.97e-05	-1
ZNF222	0.807103	0.001214	2.09e-05	-1
2003-03-01	0.77101	0.001242	2.14e-05	-1
YES1	0.77821	0.001256	2.17e-05	-1
DNHD2	0.900901	0.001266	2.19e-05	-1
ETNK1	0.81103	0.001289	2.24e-05	-1
ZNF791	0.776398	0.001289	2.25e-05	-1
ZNF669	0.810373	0.001315	2.3e-05	-1
CRIPAK	0.8	0.001362	2.39e-05	-1
CAPZA1	0.86881	0.001367	2.41e-05	-1
AHSA2	0.749064	0.001369	2.41e-05	-1
AKTIP	0.753012	0.00138	2.44e-05	-1
MGRN1	0.922509	0.001404	2.51e-05	-1
RTN3	0.903342	0.001407	2.49e-05	-1
FLJ39531	0.834725	0.001407	2.51e-05	-1
HIST1H2BD	0.90009	0.00141	2.5e-05	-1
RPS6KA3	0.987167	0.00141	2.53e-05	-1
THUMPD1	0.794913	0.001428	2.58e-05	-1
RAI14	0.792393	0.001429	2.57e-05	-1
MGC40405	0.806452	0.001451	2.63e-05	-1
AHDC1	0.851064	0.001453	2.63e-05	-1
MDS1	0.858369	0.001454	2.64e-05	-1
PERP	0.867303	0.001455	2.66e-05	-1
CUTL2	0.775194	0.001458	2.66e-05	-1
RHOBTB3	0.821693	0.001523	2.79e-05	-1
FLJ20273	0.915751	0.001525	2.8e-05	-1
KCTD21	0.839631	0.001555	2.86e-05	-1
DUSP8	0.78064	0.001564	2.88e-05	-1
COCH	0.813008	0.00158	2.92e-05	-1
OSGEPL1	0.75643	0.001596	2.96e-05	-1
UBE2V1	0.798722	0.001606	2.98e-05	-1
RPL27A	0.929368	0.001614	3e-05	-1
C1orf41	0.840336	0.001656	3.1e-05	-1
MIB1	0.817661	0.001678	3.15e-05	-1
TMTC2	0.809061	0.001716	3.23e-05	-1
MGC52282	0.923361	0.001735	3.27e-05	-1
EBF1	0.804505	0.00174	3.29e-05	-1
ENTPD5	0.786164	0.001757	3.33e-05	-1
NPR2	0.780031	0.001775	3.38e-05	-1
ZNF561	0.839631	0.001798	3.44e-05	-1
SLC35D3	0.83682	0.001799	3.43e-05	-1
RPL26	0.779423	0.001836	3.53e-05	-1
LOC731950	0.808407	0.001836	3.52e-05	-1
BCAS2	0.862813	0.00184	3.53e-05	-1
IDUA	0.891266	0.00187	3.61e-05	-1
KIAA1799	0.803213	0.001899	3.67e-05	-1
FAM98A	0.789889	0.001907	3.71e-05	-1
GRIPAP1	0.761035	0.001909	3.7e-05	-1
SLC16A10	0.788022	0.001927	3.75e-05	-1
ANXA4	0.891266	0.001955	3.82e-05	-1
HTR3B	0.860585	0.001973	3.86e-05	-1
RBM7	0.82713	0.001974	3.87e-05	-1
AFTPH	0.849618	0.001983	3.9e-05	-1
DPCR1	0.824402	0.001986	3.91e-05	-1
BIRC3	0.968054	0.001988	3.93e-05	-1
MANEA	0.869565	0.00199	3.94e-05	-1
KLHDC1	0.787402	0.001992	3.95e-05	-1
C9orf77	0.791766	0.001994	3.96e-05	-1
C21orf7	0.801925	0.001994	3.97e-05	-1
KIAA1530	0.790514	0.002019	4.03e-05	-1
CCL8	0.883392	0.002021	4.05e-05	-1
ATP2C1	0.843882	0.002026	4.07e-05	-1
FLJ39653	0.780031	0.002027	4.08e-05	-1
ZNF580	0.896057	0.002032	4.11e-05	-1
PABPC3	0.84317	0.002034	4.11e-05	-1
UBE1DC1	0.798722	0.002053	4.16e-05	-1
KCTD13	0.84246	0.002112	4.29e-05	-1
CD22	0.816993	0.002127	4.33e-05	-1
ZNF12	0.794281	0.002144	4.38e-05	-1
EDAR	0.791139	0.002148	4.4e-05	-1
COL25A1	0.831255	0.002173	4.46e-05	-1
HOXB6	0.806452	0.002179	4.49e-05	-1
DHX57	0.817661	0.002192	4.53e-05	-1
DIS3	0.811688	0.002192	4.54e-05	-1
CENTD1	0.865052	0.002195	4.55e-05	-1
C12orf23	0.837521	0.002195	4.56e-05	-1
INSIG2	0.792393	0.002261	4.71e-05	-1
USP25	0.859845	0.002269	4.75e-05	-1
NKAP	0.851064	0.00227	4.74e-05	-1
FANCB	0.794913	0.002282	4.8e-05	-1
BRDG1	0.800641	0.002284	4.79e-05	-1
ZNF439	0.772798	0.002284	4.8e-05	-1
FIGNL1	0.855432	0.002321	4.9e-05	-1
RPL23	0.798722	0.002327	4.93e-05	-1
NELL2	0.790514	0.002332	4.93e-05	-1
ATP5G2	0.84317	0.002363	5.02e-05	-1
SYNJ2	0.782473	0.002382	5.07e-05	-1
SERPINF1	0.908265	0.00239	5.11e-05	-1
CCDC132	0.794281	0.002394	5.1e-05	-1
ACY1L2	0.788644	0.002404	5.15e-05	-1
TFPI	0.862069	0.00246	5.28e-05	-1
NMUR1	0.803213	0.00249	5.35e-05	-1
RALGPS2	0.810373	0.002531	5.45e-05	-1
DLL1	0.817661	0.002541	5.49e-05	-1
APEG1	0.866551	0.002571	5.6e-05	-1
EPB41	0.891266	0.002573	5.59e-05	-1
PPARD	0.839631	0.002578	5.63e-05	-1
Sep-06	0.833333	0.002595	5.67e-05	-1
ACTR3	0.801282	0.002597	5.69e-05	-1
OFD1	0.792393	0.002602	5.71e-05	-1
LYPD2	0.983284	0.002609	5.74e-05	-1
ASTE1	0.798722	0.002627	5.8e-05	-1
ACP5	0.838926	0.002627	5.79e-05	-1
ANKDD1A	0.90009	0.002634	5.83e-05	-1
ADAL	0.775795	0.002644	5.89e-05	-1
NALP1	0.882613	0.002648	5.89e-05	-1
MAS1	0.858369	0.002663	5.94e-05	-1
GUSBL1	0.813008	0.002664	5.97e-05	-1
ASPM	0.857633	0.002664	5.96e-05	-1
SLC5A8	0.831255	0.00267	5.99e-05	-1
PDE7A	0.808407	0.002693	6.08e-05	-1
BZRAP1	0.801925	0.002694	6.07e-05	-1
ZNF239	0.776398	0.002801	6.34e-05	-1
SCML1	0.813008	0.002805	6.37e-05	-1
SPARC	0.914077	0.002807	6.39e-05	-1
ARHGEF1	0.90009	0.00281	6.37e-05	-1
LAMC1	0.886525	0.002814	6.42e-05	-1
HS2ST1	0.862069	0.002815	6.43e-05	-1
RTN4	0.838223	0.002818	6.45e-05	-1
KLHL7	0.831947	0.002819	6.47e-05	-1
NFIA	0.86881	0.002834	6.51e-05	-1
HSPA1B	0.917431	0.002879	6.63e-05	-1
BACH2	0.772798	0.002887	6.68e-05	-1
MGC24975	0.803213	0.002891	6.67e-05	-1
SLFN5	0.831947	0.002893	6.7e-05	-1
ZNF700	0.788644	0.002899	6.73e-05	-1
SH2D3A	0.81367	0.002975	6.92e-05	-1
GPRASP2	0.773994	0.002989	6.97e-05	-1
FAM73A	0.789889	0.00299	6.98e-05	-1
HSN2	0.892061	0.003001	7.02e-05	-1
KIAA0408	0.943396	0.003003	7.04e-05	-1
ANKRD15	0.980392	0.003057	7.18e-05	-1
SACS	0.845309	0.003092	7.27e-05	-1
TCF7L2	0.874126	0.003098	7.3e-05	-1
KIAA1279	0.783699	0.003109	7.35e-05	-1
DCUN1D1	0.953289	0.003138	7.43e-05	-1
HIST1H2AE	0.943396	0.00314	7.45e-05	-1
TXNL6	0.809061	0.003151	7.48e-05	-1
FASTKD3	0.834725	0.003155	7.54e-05	-1
GPRASP1	0.796178	0.003157	7.53e-05	-1
JOSD2	0.982318	0.003161	7.52e-05	-1
ZNF549	0.801925	0.003162	7.57e-05	-1
TBC1D23	0.925069	0.003179	7.62e-05	-1
MGC35402	0.824402	0.00318	7.64e-05	-1
SNX22	0.835422	0.003255	7.87e-05	-1
STK38L	0.859107	0.003256	7.85e-05	-1
FLJ36492	0.832639	0.00334	8.1e-05	-1
ZC3H12B	0.781861	0.003341	8.12e-05	-1
VSIG1	0.81367	0.003362	8.18e-05	-1
PACAP	0.859107	0.003365	8.21e-05	-1
SYNC1	0.829187	0.003408	8.33e-05	-1
SDK2	0.809061	0.003411	8.35e-05	-1
SLC16A3	0.865801	0.003417	8.38e-05	-1
CXCR6	0.919118	0.003431	8.43e-05	-1
GMNN	0.834725	0.003456	8.51e-05	-1
IL1B	0.927644	0.003496	8.62e-05	-1
CDIPT	0.844595	0.003496	8.64e-05	-1
BMP6	0.88968	0.003529	8.73e-05	-1
CMTM8	0.802568	0.003559	8.84e-05	-1
HIST2H2BE	0.875657	0.00356	8.83e-05	-1
RNPC3	0.917431	0.003573	8.89e-05	-1
NARG1L	0.892061	0.003589	8.95e-05	-1
TMEM1	0.848176	0.003643	9.12e-05	-1
FLJ39822	0.884173	0.003643	9.1e-05	-1
TBXA2R	0.816993	0.003657	9.17e-05	-1
UBE2H	0.927644	0.00366	9.19e-05	-1
CDC14A	0.812348	0.003671	9.23e-05	-1
ZBTB2	0.846024	0.003679	9.27e-05	-1
IRAK1BP1	0.798722	0.00369	9.31e-05	-1
HEATR3	0.860585	0.00371	9.38e-05	-1
PPM1B	0.804505	0.003713	9.41e-05	-1
GKAP1	0.87184	0.00374	9.49e-05	-1
EDN1	0.78125	0.003759	9.56e-05	-1
HLA-G	0.88574	0.003797	9.69e-05	-1
APBA2	0.825083	0.003798	9.67e-05	-1
TAF9	0.880282	0.003798	9.71e-05	-1
ATM	0.784314	0.003801	9.73e-05	-1
ZNF444	0.851789	0.003821	9.8e-05	-1
SERPINE2	0.869565	0.003884	0.0001007	-1
PLEKHK1	0.855432	0.00389	0.0001007	-1
PCGF5	0.846024	0.003893	0.0001006	-1
DTX3	0.818331	0.003893	0.0001018	-1
SIRPG	0.878735	0.003897	0.0001017	-1
LOC492311	0.81103	0.003901	0.0001016	-1
ZNF124	0.893655	0.003949	0.0001036	-1
CLDN15	0.821693	0.003952	0.000104	-1
PLAG1	0.788644	0.003958	0.000104	-1
MPL	0.968054	0.003992	0.0001055	-1
SDPR	0.862069	0.003994	0.0001053	-1
NUCKS1	0.881057	0.004003	0.0001061	-1
NGFRAP1	0.892061	0.004003	0.0001063	-1
FHIT	0.86881	0.004008	0.0001061	-1
MED8	0.859107	0.004087	0.0001087	-1
MKL2	0.846024	0.004092	0.000109	-1
ZNF563	0.831947	0.004193	0.0001121	-1
MACF1	0.969932	0.004196	0.000112	-1
ZNF772	0.840336	0.004242	0.0001138	-1
ZNF816A	0.821018	0.004249	0.0001138	-1
PPWD1	0.840336	0.004295	0.0001154	-1
CEACAM6	0.943396	0.00431	0.000116	-1
LOC442535	0.922509	0.004316	0.0001164	-1
BRD4	0.859107	0.004331	0.000117	-1
CHTF18	0.862813	0.004351	0.0001177	-1
C18orf45	0.893655	0.00436	0.0001181	-1
TNFRSF17	0.929368	0.004414	0.0001198	-1
C14orf173	0.864304	0.004427	0.0001203	-1
CAV2	0.860585	0.004428	0.0001206	-1
TTRAP	0.851789	0.004457	0.0001216	-1
RNASEH2B	0.834028	0.004484	0.0001227	-1
TUBE1	0.798722	0.004491	0.0001227	-1
WASF3	0.927644	0.004548	0.0001246	-1
TMEM167	0.856164	0.004726	0.00013	-1
HSPA4	0.84674	0.004727	0.0001298	-1
TTK	0.808407	0.004835	0.0001334	-1
MFAP3	0.865052	0.004841	0.0001338	-1
ACAD8	0.817661	0.004857	0.0001344	-1
B3GALT2	0.815661	0.004859	0.0001347	-1
NFIX	0.95511	0.004899	0.0001363	-1
CRTAM	0.834725	0.004998	0.0001397	-1
FHL2	0.848176	0.004999	0.0001395	-1
STAU1	0.832639	0.004999	0.0001399	-1
UTP11L	0.878735	0.005003	0.0001403	-1
CALD1	0.97371	0.005015	0.0001408	-1
C14orf130	0.805153	0.005029	0.0001417	-1
PPIL1	0.899281	0.005048	0.0001424	-1
LAMA5	0.862069	0.005081	0.0001436	-1
ZNF91	0.855432	0.005158	0.0001463	-1
DGKG	0.873362	0.00516	0.0001461	-1
CEPT1	0.918274	0.005225	0.0001484	-1
IFT74	0.81103	0.005277	0.0001501	-1
FCER1A	0.897666	0.005329	0.0001523	-1
OTEX	0.793021	0.005331	0.0001521	-1
PLOD2	0.978474	0.005333	0.0001519	-1
FOXC2	0.820345	0.005348	0.0001533	-1
CRYZ	0.837521	0.005349	0.0001541	-1
MS4A1	0.912409	0.005353	0.0001532	-1
FAM29A	0.862813	0.005354	0.000154	-1
FEZ1	0.858369	0.005535	0.0001612	-1
LOC730422	0.923361	0.005538	0.0001598	-1
ABCA5	0.835422	0.00554	0.0001608	-1
MTHFD2L	0.832639	0.005541	0.0001611	-1
TPM4	0.890472	0.005544	0.0001607	-1
CHI3L2	0.84674	0.005545	0.0001617	-1
C21orf66	0.860585	0.00555	0.0001606	-1
TM2D2	0.81367	0.005552	0.0001604	-1
FLJ31438	0.892857	0.005568	0.0001627	-1
RABGAP1L	0.853242	0.005686	0.0001666	-1
GGTL3	0.796178	0.005767	0.0001692	-1
ALOX12	0.904159	0.00578	0.0001702	-1
NT5E	0.877193	0.005788	0.0001701	-1
C11orf31	0.794913	0.005817	0.0001723	-1
SCML4	0.837521	0.005818	0.0001715	-1
BUB3	0.804505	0.005818	0.0001718	-1
IER3IP1	0.870322	0.005867	0.000174	-1
GPR18	0.816327	0.005901	0.0001756	-1
RHBDD3	0.834028	0.005904	0.0001754	-1
TPST1	0.806452	0.005913	0.0001765	-1
TNRC6A	0.827815	0.005943	0.0001776	-1
CD69	0.990099	0.00596	0.0001784	-1
RLN2	0.859107	0.005964	0.0001788	-1
AVP	0.875657	0.005974	0.0001796	-1
C8orf16	0.881057	0.006027	0.0001815	-1
GPC2	0.816993	0.006052	0.0001825	-1
LOC442582	0.851789	0.006091	0.0001839	-1
ZDHHC20	0.877963	0.006095	0.0001844	-1
CCAR1	0.851789	0.006171	0.0001869	-1
NRGN	0.954198	0.006175	0.0001876	-1
SFRS12	0.84317	0.006178	0.0001883	-1
2'-PDE	0.874126	0.006205	0.0001894	-1
KLRB1	0.87184	0.006218	0.0001906	-1
LOC400464	0.814996	0.006226	0.0001906	-1
C6orf105	0.877963	0.006232	0.0001905	-1
DNAJB4	0.831255	0.006238	0.0001923	-1
ZNF654	0.895255	0.00624	0.0001918	-1
EGF	0.903342	0.006241	0.0001927	-1
C3orf18	0.815661	0.006242	0.0001916	-1
L3MBTL	0.8	0.006246	0.0001931	-1
CCDC41	0.823045	0.006246	0.0001923	-1
CBY1	0.801282	0.006383	0.0001982	-1
CXorf39	0.848896	0.006384	0.0001985	-1
UBXD6	0.838223	0.006385	0.000198	-1
WDR27	0.815661	0.006505	0.0002026	-1
DPP4	0.821018	0.00664	0.0002074	-1
ELOVL4	0.893655	0.006649	0.0002074	-1
SPHAR	0.923361	0.006659	0.0002083	-1
SALL2	0.822368	0.00667	0.000209	-1
PKD1	0.87184	0.007014	0.0002204	-1
ZNF140	0.848896	0.007016	0.0002207	-1
ADCY7	0.83682	0.007023	0.0002213	-1
EDG1	0.838926	0.007066	0.000223	-1
GBP1	0.864304	0.007135	0.0002258	-1
CGI-09	0.881057	0.007205	0.0002283	-1
LBR	0.990099	0.007283	0.0002311	-1
TUBD1	0.823045	0.007314	0.0002324	-1
SLC25A22	0.875657	0.007384	0.000235	-1
PLVAP	0.923361	0.00742	0.0002365	-1
MRS2L	0.845309	0.007438	0.0002374	-1
C1orf156	0.862813	0.007463	0.0002385	-1
PPIG	0.815661	0.007607	0.0002435	-1
LOC201725	0.854701	0.007652	0.0002452	-1
OSBPL10	0.823723	0.007653	0.0002456	-1
TRIM52	0.833333	0.007782	0.0002505	-1
SEMA3C	0.88574	0.007792	0.0002515	-1
SHFM1	0.853242	0.007838	0.0002533	-1
NIPBL	0.823723	0.007873	0.0002552	-1
SLC25A45	0.798085	0.007877	0.000256	-1
RLTPR	0.849618	0.007884	0.0002559	-1
CRYZL1	0.789889	0.007964	0.0002592	-1
DOLK	0.848176	0.007983	0.0002602	-1
FLJ35429	0.843882	0.008042	0.0002625	-1
CDC42	0.952381	0.008066	0.0002636	-1
SNX16	0.853242	0.008223	0.0002691	-1
MTMR12	0.865801	0.008315	0.0002732	-1
CTRC	0.915751	0.008316	0.0002737	-1
NCR3	0.924214	0.008318	0.000273	-1
KPNA5	0.88574	0.008329	0.0002729	-1
MGC26718	0.816993	0.008357	0.0002754	-1
ACBD4	0.846024	0.008432	0.0002782	-1
ZNF567	0.839631	0.008475	0.0002816	-1
NIPA1	0.826446	0.008477	0.0002809	-1
TRIM46	0.892061	0.00848	0.0002806	-1
CEP70	0.823723	0.008482	0.0002814	-1
PPIE	0.862813	0.008487	0.0002804	-1
KLHL9	0.816993	0.008495	0.0002826	-1
ACCN2	0.858369	0.008688	0.0002894	-1
AS3MT	0.83682	0.008715	0.0002907	-1
PSMD11	0.851064	0.008783	0.0002934	-1
C7orf43	0.88574	0.00879	0.0002944	-1
IDS	0.880282	0.008793	0.0002941	-1
YRDC	0.849618	0.008807	0.0002954	-1
MXRA7	0.97371	0.008933	0.0003	-1
EMB	0.899281	0.008942	0.0003015	-1
TATDN1	0.825083	0.008944	0.0003012	-1
C6orf150	0.86881	0.008994	0.0003037	-1
PKIA	0.832639	0.009026	0.0003052	-1
NPIP	0.849618	0.009046	0.0003063	-1
SMN1	0.908265	0.009209	0.000313	-1
YWHAG	0.852515	0.00921	0.0003122	-1
FLJ42957	0.852515	0.009218	0.0003129	-1
CCDC34	0.860585	0.009252	0.0003149	-1
FNDC3A	0.84674	0.009334	0.0003181	-1
NUCB2	0.807103	0.009404	0.0003209	-1
PCTK3	0.846024	0.00942	0.0003223	-1
FLJ34969	0.810373	0.009431	0.0003223	-1
BCL2A1	0.984252	0.009462	0.0003241	-1
OSBPL8	0.834028	0.009485	0.0003254	-1
ZFP14	0.824402	0.009565	0.0003285	-1
STX2	0.915751	0.009566	0.000329	-1
MSTO1	0.870322	0.00963	0.0003316	-1
INPP5E	0.851064	0.009705	0.0003347	-1
HMGN3	0.877193	0.009745	0.0003365	-1
CYP2E1	0.888099	0.00979	0.0003385	-1
CRIP2	0.979432	0.009811	0.0003397	-1
LINGO2	0.880282	0.01003	0.0003477	-1
TMEM63A	0.882613	0.01004	0.0003485	-1
ZNF254	0.835422	0.01005	0.0003497	-1
TAOK2	0.884956	0.01005	0.0003505	-1
IFP38	0.829187	0.01005	0.0003501	-1
SUMO2	0.817661	0.01006	0.0003495	-1
LOC340156	0.82713	0.01013	0.0003542	-1
HIST1H3F	0.922509	0.01016	0.0003557	-1
SFPQ	0.835422	0.01025	0.0003593	-1
SORBS3	0.909091	0.01026	0.0003603	-1
DENND4A	0.809061	0.01031	0.0003633	-1
TMEM106A	0.838223	0.01032	0.0003632	-1
FXN	0.800641	0.01032	0.0003641	-1
RBM11	0.816327	0.01044	0.000369	-1
SBDS	0.837521	0.01056	0.0003736	-1
GPR180	0.870322	0.01062	0.0003763	-1
FAM80B	0.81103	0.01063	0.0003771	-1
ZC3H10	0.855432	0.01067	0.0003791	-1
LTBP3	0.958773	0.01078	0.000384	-1
CKAP2	0.865801	0.01079	0.0003837	-1
ARMCX4	0.827815	0.01081	0.0003855	-1
MSH2	0.843882	0.01085	0.0003874	-1
CUL5	0.819672	0.0109	0.0003896	-1
CRTC2	0.825764	0.01093	0.0003913	-1
GPRIN3	0.86881	0.01108	0.0003971	-1
CLDN23	0.928505	0.0111	0.0003982	-1
LOC221442	0.814996	0.01117	0.0004015	-1
FLJ14397	0.862813	0.01119	0.000403	-1
PFTK1	0.857633	0.0112	0.0004044	-1
SLC23A3	0.892061	0.01121	0.0004053	-1
HIST1H3H	0.981354	0.01121	0.0004044	-1
PAK2	0.869565	0.01126	0.0004075	-1
CLIC3	0.919963	0.01132	0.0004103	-1
RBM39	0.918274	0.01135	0.0004117	-1
PTGES3	0.845309	0.01135	0.0004122	-1
C5orf33	0.841043	0.01143	0.0004159	-1
BTAF1	0.796813	0.01144	0.0004167	-1
ZFP91	0.935454	0.01148	0.0004185	-1
FLJ31951	0.829187	0.0116	0.0004242	-1
LOC440993	0.95511	0.01165	0.0004263	-1
AIM2	0.851789	0.01167	0.0004277	-1
ZNF285A	0.81103	0.01176	0.000433	-1
PRPF39	0.883392	0.01176	0.0004324	-1
HPCAL4	0.867303	0.01178	0.000435	-1
LOC284757	0.831947	0.01183	0.0004378	-1
RPS6KA5	0.841043	0.01183	0.0004374	-1
SAR1A	0.858369	0.01185	0.0004391	-1
ZNF354A	0.890472	0.0119	0.0004432	-1
TEAD2	0.87108	0.0119	0.0004437	-1
SCYL1BP1	0.8285	0.01191	0.0004429	-1
ATF1	0.877193	0.01192	0.0004451	-1
RNF207	0.931966	0.01192	0.0004454	-1
ZFY	0.93985	0.01218	0.0004563	-1
FBXL3	0.865801	0.01222	0.0004583	-1
SLC2A14	0.997009	0.01247	0.0004683	-1
EFHC2	0.81367	0.01269	0.0004771	-1
KLHL14	0.834725	0.01286	0.0004842	-1
TXNDC9	0.845309	0.0131	0.0004949	-1
MOBKL2B	0.874891	0.0131	0.0004937	-1
FCRL1	0.865801	0.01311	0.0004957	-1
C15orf5	0.887311	0.01312	0.0004969	-1
ZNF167	0.824402	0.01314	0.000498	-1
ZNF493	0.821018	0.01315	0.0004991	-1
NAP1L1	0.848896	0.01326	0.0005044	-1
ZNF545	0.881057	0.01327	0.0005054	-1
RNF19	0.874126	0.01333	0.0005082	-1
MMP23A	0.914077	0.01338	0.0005108	-1
XK	0.898473	0.01343	0.0005152	-1
FBXO42	0.844595	0.01343	0.0005146	-1
SMA4	0.912409	0.01345	0.0005165	-1
CLIC4	0.903342	0.01348	0.0005183	-1
TRIM38	0.788022	0.01366	0.0005264	-1
CD3E	0.913242	0.01366	0.0005273	-1
C6orf120	0.856164	0.01371	0.0005297	-1
FLJ46020	0.837521	0.01371	0.0005335	-1
UBE2D2	0.94518	0.01372	0.0005319	-1
METTL5	0.814332	0.01372	0.0005314	-1
DDX52	0.82713	0.01373	0.0005311	-1
LEFTY1	0.857633	0.01373	0.0005334	-1
UAP1L1	0.896861	0.01376	0.0005358	-1
DNAJC19	0.857633	0.01387	0.0005415	-1
ANP32C	0.922509	0.01388	0.0005413	-1
TRAPPC2	0.869565	0.01391	0.0005436	-1
DMWD	0.938086	0.01426	0.000558	-1
C11orf58	0.914077	0.01429	0.00056	-1
KCNMB1	0.826446	0.01429	0.0005605	-1
FBXO2	0.858369	0.01429	0.0005609	-1
NSD1	0.821693	0.01431	0.0005625	-1
C7orf28B	0.846024	0.01438	0.0005666	-1
SYT15	0.852515	0.01439	0.0005663	-1
C17orf69	0.867303	0.01447	0.0005707	-1
FBXL16	0.877193	0.01454	0.0005762	-1
PNMA3	0.966184	0.01454	0.0005748	-1
ZNF573	0.804505	0.01455	0.0005759	-1
LEF1	0.804505	0.01455	0.0005746	-1
XBP1	0.83682	0.01458	0.0005792	-1
PTPN12	0.864304	0.01459	0.0005786	-1
IVD	0.841043	0.01461	0.0005808	-1
C14orf151	0.848896	0.01468	0.0005844	-1
MECR	0.859845	0.01473	0.0005877	-1
C4orf16	0.848176	0.01501	0.0005993	-1
CLEC4C	0.92081	0.01502	0.0006007	-1
SFRS16	0.859107	0.01503	0.0006017	-1
IFNG	0.898473	0.01503	0.000603	-1
PMS2	0.873362	0.01504	0.0006026	-1
ADAMTS1	0.852515	0.01517	0.0006094	-1
MAPK1	0.956023	0.01538	0.0006191	-1
CTR9	0.809061	0.01542	0.0006228	-1
HNRPH2	0.87184	0.01542	0.000622	-1
CSNK1A1	0.896861	0.01544	0.0006242	-1
UTS2	0.960615	0.01546	0.0006256	-1
LOC91431	0.913242	0.01549	0.0006277	-1
PRIM2A	0.931099	0.01561	0.0006333	-1
PGM2L1	0.840336	0.01566	0.0006361	-1
RBM13	0.819001	0.01572	0.0006392	-1
SCAMP5	0.838926	0.01609	0.0006558	-1
FCGR2B	0.93633	0.01623	0.0006629	-1
DYRK1B	0.929368	0.01623	0.0006634	-1
IGJ	0.946074	0.0163	0.0006678	-1
ARMCX2	0.802568	0.01631	0.0006677	-1
HAT1	0.849618	0.01632	0.0006693	-1
BTBD15	0.87184	0.01637	0.0006732	-1
DNAJC1	0.88574	0.01639	0.0006731	-1
NEUROG3	0.925926	0.01649	0.0006796	-1
C15orf29	0.811688	0.01654	0.0006823	-1
ABCB6	0.831947	0.01663	0.0006868	-1
ZNF551	0.807103	0.017	0.0007034	-1
RAB14	0.832639	0.01702	0.0007057	-1
PLCXD1	0.824402	0.01702	0.0007051	-1
MBNL2	0.8726	0.01706	0.0007085	-1
CCDC117	0.830565	0.01709	0.0007103	-1
DCAL1	0.888099	0.01715	0.0007145	-1
TAS2R45	0.949668	0.01728	0.0007206	-1
BCL3	0.972763	0.0173	0.0007238	-1
SUMO4	0.832639	0.01731	0.0007226	-1
IFIT2	0.925069	0.01731	0.0007233	-1
SACM1L	0.83612	0.01737	0.0007274	-1
MRPL2	0.841751	0.01746	0.000732	-1
TAF1C	0.893655	0.01755	0.0007364	-1
THAP6	0.846024	0.01759	0.0007389	-1
FZD6	0.874126	0.01775	0.0007482	-1
PSCDBP	0.831947	0.01782	0.0007518	-1
ZNF611	0.862813	0.01789	0.0007557	-1
ASF1A	0.864304	0.01802	0.0007627	-1
LOC401620	0.957854	0.01803	0.0007625	-1
RBMXL1	0.870322	0.01813	0.0007683	-1
RRN3	0.845309	0.01815	0.0007723	-1
PAQR8	0.825083	0.01815	0.0007699	-1
GNB5	0.922509	0.01817	0.0007741	-1
RKHD2	0.848896	0.01832	0.000783	-1
HMG1L1	0.864304	0.01832	0.0007839	-1
CCDC95	0.927644	0.01834	0.0007828	-1
ZNF202	0.831947	0.01849	0.000792	-1
ZFP36L1	0.841043	0.01851	0.0007936	-1
PREPL	0.831255	0.01856	0.0007965	-1
TMEPAI	0.866551	0.01876	0.0008069	-1
TSPAN13	0.877193	0.01891	0.0008139	-1
TCF3	0.827815	0.01913	0.0008245	-1
SP4	0.833333	0.01939	0.0008372	-1
CUZD1	0.849618	0.01941	0.0008392	-1
ACRBP	0.892061	0.01965	0.0008505	-1
KPNA3	0.847458	0.01975	0.0008565	-1
TNFRSF21	0.912409	0.01976	0.0008558	-1
COL5A2	0.792393	0.01979	0.0008592	-1
RHPN2	0.847458	0.01984	0.0008622	-1
VPS37A	0.867303	0.0199	0.0008667	-1
TLR10	0.84317	0.01995	0.0008705	-1
ZNF331	0.82713	0.02002	0.0008745	-1
KIF27	0.838223	0.02008	0.0008781	-1
KLRC1	0.953289	0.02009	0.0008801	-1
LOC155060	0.897666	0.02009	0.0008795	-1
RAB15	0.887311	0.02018	0.0008852	-1
TRIM35	0.880282	0.02032	0.0008923	-1
SH3BP1	0.886525	0.02056	0.0009036	-1
INTU	0.867303	0.02075	0.000913	-1
VPS35	0.849618	0.02089	0.0009208	-1
LOC729416	0.935454	0.0209	0.0009205	-1
C1orf21	0.947867	0.02093	0.0009236	-1
ZNF675	0.864304	0.02116	0.0009346	-1
C20orf19	0.843882	0.02117	0.0009361	-1
ZNF43	0.86881	0.02141	0.0009476	-1
DPYD	0.914077	0.0215	0.0009528	-1
COBLL1	0.874891	0.02155	0.0009568	-1
BPTF	0.862069	0.02156	0.0009581	-1
FLJ39575	0.84674	0.02166	0.0009647	-1
CPNE5	0.962464	0.02174	0.0009691	-1
CBX3	0.838223	0.02178	0.0009718	-1
CUBN	0.862813	0.02179	0.0009735	-1
ZNF714	0.874891	0.0218	0.0009747	-1
DNAJC10	0.90009	0.02194	0.0009821	-1
ZNF83	0.81367	0.022	0.0009857	-1
FCER2	0.924214	0.02209	0.0009917	-1
CROP	0.808407	0.0221	0.0009931	-1
RPL41	0.877963	0.02212	0.0009953	-1
OAS3	0.890472	0.02227	0.001004	-1
C17orf80	0.888889	0.02229	0.001006	-1
TMEM55A	0.921659	0.02234	0.001011	-1
LOC92270	0.856898	0.02235	0.00101	-1
C1orf63	0.83612	0.02235	0.00101	-1
CKS2	0.943396	0.02244	0.001018	-1
CCDC16	0.845309	0.02246	0.001018	-1
SRI	0.881057	0.02251	0.001022	-1
UTP14C	0.85034	0.02272	0.001033	-1
ZNF425	0.829876	0.02272	0.001033	-1
ZNF195	0.808407	0.02292	0.001044	-1
AMMECR1L	0.87184	0.02295	0.001048	-1
CLK1	0.932836	0.02296	0.001046	-1
KLRG1	0.869565	0.02302	0.001052	-1
CLDND2	0.925069	0.02306	0.001055	-1
GPAM	0.818331	0.02309	0.001058	-1
LNX2	0.834725	0.0231	0.001059	-1
ANXA11	0.829187	0.02311	0.001064	-1
IBTK	0.831255	0.02311	0.00106	-1
GFI1B	0.905797	0.02312	0.001062	-1
STAG3	0.856898	0.02312	0.001063	-1
TAPBP	0.837521	0.02328	0.001073	-1
DEADC1	0.829187	0.02332	0.001076	-1
SYTL1	0.96432	0.02333	0.001076	-1
RPL7A	0.851789	0.02347	0.001084	-1
ZXDA	0.859107	0.02357	0.001092	-1
GGCX	0.884173	0.02357	0.001093	-1
ZNF687	0.891266	0.02358	0.001092	-1
CDK5RAP2	0.923361	0.02359	0.001098	-1
LOC96610	0.917431	0.02359	0.001091	-1
MRPL50	0.840336	0.02361	0.001097	-1
CD2AP	0.907441	0.02361	0.001101	-1
C1orf43	0.995025	0.02362	0.001097	-1
GPR160	0.978474	0.02362	0.0011	-1
SUPT7L	0.809061	0.02364	0.001103	-1
ABCA7	0.977517	0.02378	0.001111	-1
TMEM50B	0.878735	0.02391	0.001119	-1
RUNDC2A	0.904159	0.02405	0.001127	-1
KPNA2	0.878735	0.0241	0.00113	-1
LARS2	0.845309	0.02415	0.001133	-1
USP1	0.91659	0.02416	0.001135	-1
HIST2H4A	0.930233	0.02418	0.001139	-1
ZNF177	0.827815	0.0242	0.001139	-1
LRFN4	0.865801	0.02422	0.001139	-1
AK5	0.868056	0.02434	0.001151	-1
ZNF85	0.925069	0.02435	0.001153	-1
KIR2DL5A	0.884956	0.02435	0.001149	-1
F2RL1	0.95511	0.02437	0.001149	-1
RGS18	0.901713	0.02438	0.001155	-1
DPH4	0.844595	0.02447	0.001162	-1
PRICKLE1	0.886525	0.0246	0.001169	-1
ROBO3	0.904159	0.02462	0.001172	-1
SLAMF7	0.873362	0.02464	0.001174	-1
C21orf6	0.866551	0.02467	0.001176	-1
CARS	0.846024	0.02518	0.001203	-1
ANKFY1	0.803213	0.0252	0.001205	-1
LOC653604	0.938086	0.02534	0.001213	-1
ZNF605	0.841751	0.02541	0.001219	-1
LOC644972	0.839631	0.02545	0.001222	-1
WDR23	0.84674	0.02558	0.001229	-1
EXPH5	0.834028	0.0256	0.001231	-1
CDC5L	0.855432	0.02571	0.001239	-1
C10orf88	0.84246	0.02571	0.001238	-1
[truncated: 241 more rows]
