# Supplementary material for: In Silico Analysis Highlights Potential Predictive Indicators Associated with Secondary Progressive Multiple Sclerosis
Source: Int J Mol Sci. 2024 Mar 16;25(6):3374. doi: 10.3390/ijms25063374 (PMC10970138; doi:10.3390/ijms25063374)
Supplement: Supplementary file 1 [file ijms-25-03374-s001.zip › Supplementary Table S5.xlsx]

## Sheet: Layer 1
Supplementary Table S5. SPMS specific Biological Processes based on comparison of DEGs in CLUp specific for SPMS vs DEGs shared with RRMS
Term	Overlap	p-value	q-value	Genes
Receptor Internalization (GO:0031623)	2/51	1.18E-03	3.89E-02	CXCL8; CXCR2
Negative Regulation Of Innate Immune Response (GO:0045824)	2/52	1.22E-03	3.89E-02	SLAMF8; CGAS
Positive Regulation Of Apoptotic Process (GO:0043065)	3/270	2.34E-03	4.17E-02	CTSL; CTLA4; CLU
Regulation Of Innate Immune Response (GO:0045088)	2/78	2.73E-03	4.17E-02	GBP5; CGAS
Dendritic Cell Chemotaxis (GO:0002407)	2/15	9.90E-05	1.15E-02	CXCR2; CLU
Embryonic Organ Development (GO:0048568)	2/77	2.66E-03	4.17E-02	COL18A1; CXCL8
Calcium-Mediated Signaling Using Intracellular Calcium Source (GO:0035584)	2/20	1.79E-04	1.18E-02	SELP; CLU
Regulation Of Peptidase Activity (GO:0052547)	2/27	3.28E-04	1.63E-02	CTSL; CST7
Calcium-Mediated Signaling (GO:0019722)	3/85	8.02E-05	1.15E-02	SELP; CXCL8; CLU
Positive Regulation Of Cellular Metabolic Process (GO:0031325)	2/56	1.42E-03	4.03E-02	CXCL8; CGAS
Neutrophil Activation (GO:0042119)	2/18	1.44E-04	1.15E-02	CXCL8; CXCR2
Positive Regulation Of Programmed Cell Death (GO:0043068)	3/245	1.77E-03	4.17E-02	GBP5; CTLA4; CLU
Protein Tetramerization (GO:0051262)	2/73	2.39E-03	4.17E-02	GBP5; CLU
Granulocyte Chemotaxis (GO:0071621)	2/73	2.39E-03	4.17E-02	CXCL8; CXCR2
Neutrophil Chemotaxis (GO:0030593)	2/70	2.20E-03	4.17E-02	CXCL8; CXCR2
Response To Molecule Of Bacterial Origin (GO:0002237)	2/69	2.14E-03	4.17E-02	SELP; CXCL8
Neutrophil Migration (GO:1990266)	2/77	2.66E-03	4.17E-02	CXCL8; CXCR2
Protein Homotetramerization (GO:0051289)	2/53	1.27E-03	3.89E-02	GBP5; CLU
Receptor-Mediated Endocytosis (GO:0006898)	3/122	2.34E-04	1.33E-02	CXCL8; CTSL; CXCR2
Positive Regulation Of Apoptotic Signaling Pathway (GO:2001235)	2/62	1.73E-03	4.17E-02	WWOX; CTSL
Dendritic Cell Migration (GO:0036336)	2/18	1.44E-04	1.15E-02	CXCR2; CLU
Regulation Of Defense Response To Virus By Host (GO:0050691)	2/37	6.20E-04	2.74E-02	CGAS; MICB
In this Supplementary Table, we report the Biological Processes (BPs) significantly enriched from CLUp DEGs that were not identified as RRMS DEGs. From the list of BPs, we filtered out the processes significantly enriched from CLUp DEGs with the same expression pattern observed in SPMS and RRMS.

## Sheet: Layer 2
Supplementary Table S5. SPMS specific Biological Processes based on comparison of DEGs in RuLu specific for SPMS vs DEGs shared with RRMS.
Term	Overlap	p-value	q-value	Genes
Receptor Internalization (GO:0031623)	3/51	6.67E-04	4.74E-02	CXCL8; CXCR2; DRD3
Regulation Of calcineurin-NFAT Signaling Cascade (GO:0070884)	3/34	2.00E-04	3.04E-02	HOMER2; FHL2; HOMER3
Negative Regulation Of Calcineurin-Mediated Signaling (GO:0106057)	3/11	5.82E-06	2.21E-03	HOMER2; FHL2; HOMER3
Regulation Of Leukocyte Tethering Or Rolling (GO:1903236)	2/11	5.96E-04	4.74E-02	SELP; ST3GAL4
Positive Regulation Of Leukocyte Tethering Or Rolling (GO:1903238)	2/6	1.64E-04	3.04E-02	SELP; ST3GAL4
Negative Regulation Of calcineurin-NFAT Signaling Cascade (GO:0070885)	3/11	5.82E-06	2.21E-03	HOMER2; FHL2; HOMER3
G Protein-Coupled Glutamate Receptor Signaling Pathway (GO:0007216)	2/12	7.14E-04	4.74E-02	HOMER2; HOMER3
Regulation Of Store-Operated Calcium Entry (GO:2001256)	2/9	3.92E-04	4.26E-02	HOMER2; HOMER3
Protein Homotetramerization (GO:0051289)	3/53	7.47E-04	4.74E-02	GBP5; SHMT1; CLU
Positive Regulation Of Programmed Cell Death (GO:0043068)	6/245	1.70E-04	3.04E-02	GBP5; FLCN; CTLA4; SEPTIN4; CLU; HTATIP2
Regulation Of Defense Response To Virus By Host (GO:0050691)	3/37	2.57E-04	3.26E-02	CGAS; TARBP2; MICB
Granulocyte Activation (GO:0036230)	2/12	7.14E-04	4.74E-02	CXCL8; CXCR2
In this Supplementary Table, we report the Biological Processes (BPs) significantly enriched from RuLu DEGs that were not identified as RRMS DEGs. From the list of BPs, we filtered out the processes significantly enriched from RuLu DEGs with the same expression pattern observed in SPMS and RRMS.

## Sheet: Layer 3
Supplementary Table S5. SPMS specific Biological Processes based on comparison of DEGs having different expression behavior between SPMS and RRMS vs DEGs with the same behavior in SPMS and RRMS.
Term	Overlap	p-value	q-value	Genes
Negative Regulation Of calcineurin-NFAT Signaling Cascade (GO:0070885)	3/11	5.32E-05	3.51E-02	HOMER2; FHL2; HOMER3
Negative Regulation Of Calcineurin-Mediated Signaling (GO:0106057)	3/11	5.32E-05	3.51E-02	HOMER2; FHL2; HOMER3
Regulation Of Defense Response To Virus By Host (GO:0050691)	4/37	1.27E-04	4.19E-02	DHX9; CGAS; TARBP2; MICB
In this Supplementary Table, we report the Biological Processes (BP) significantly enriched from the genes with different expression pattern observed in SPMS and RRMS. From the list of BPs we filtered out the processes significantly enriched from the genes with the same expression pattern observed in SPMS and RRMS .
